# Supplementary material for: The metabolome of Mexican cavefish shows a convergent signature highlighting sugar, antioxidant, and Ageing-Related metabolites
Source: eLife. 2022 Jun 15;11:e74539. doi: 10.7554/eLife.74539 (PMC9200406; doi:10.7554/eLife.74539)
Supplement: Supplementary file 1. — Columns represent different population and feeding condition combinations. [file elife-74539-supp1.xlsx]

## Sheet: primary-crosspop
		Pachon vs. Surface									Tinaja vs. Surface									Pachon vs. Tinaja
		Brain			Muscle			Liver			Brain			Muscle			Liver			Brain			Muscle			Liver
		30d	4d	Ref	30d	4d	Ref	30d	4d	Ref	30d	4d	Ref	30d	4d	Ref	30d	4d	Ref	30d	4d	Ref	30d	4d	Ref	30d	4d	Ref
Amino acids	2-ketoadipic acid							↓														↓				↓		↑
	2-ketoisocaproic acid				↓	↓	↓						↓	↓	↓	↓			↑									↓
	3-aminoisobutyric acid																		↑								↓	↓
	4-aminobutyric acid	↓		↓		↑																		↑
	N-acetylaspartic acid				↓		↓				↓	↓		↓		↓						↑				↑
	N-acetylputrescine				↓		↓							↓			↓		↓							↑		↑
	N-carbamoylaspartate									↓																		↓
	N-carbamylglutamate																			↓
	alanine													↓				↑			↑
	alpha-aminoadipic acid	↑			↓	↓	↓					↓	↓	↓	↓	↓				↑	↑	↑					↓
	aminomalonate								↑															↑	↑		↑
	aspartic acid		↓	↓		↓	↓	↑			↓				↓		↓	↓	↓		↓	↓				↑	↑	↑
	beta-alanine				↓	↓				↑					↓												↑	↑
	citrulline													↓		↓
	creatinine	↑					↓				↑		↑	↓	↓	↓					↑	↓		↑
	cysteine		↓				↓							↓	↓	↓	↑				↓	↓
	glutamic acid					↓	↓	↑		↑					↓	↓	↑											↑
	glutamine						↓								↓	↓			↑					↑				↓
	glycine								↑															↑
	histidine					↓							↑		↓	↓			↓			↓						↑
	isoleucine		↓			↓	↓								↓	↓	↓	↓	↓							↑	↑	↑
	leucine		↓				↓								↓	↓	↓	↓	↓				↑			↑	↑	↑
	lysine						↓		↓						↓	↓		↓	↓									↑
	methionine sulfoxide	↑											↑			↓	↓	↓		↑						↑
	noradrenaline							↑			↑					↓			↓	↓						↑
	ornithine				↓	↓	↓							↓	↓	↓			↓			↓						↑
	oxoproline							↑		↑			↓		↓	↓	↑					↑			↑			↑
	phenylalanine					↓	↓		↓						↓	↓	↓	↓	↓					↑				↑
	proline	↓		↓			↓	↑								↓	↑							↑
	serine	↑		↑		↓	↓							↓	↓	↓	↓	↓	↓	↑			↑	↑	↑	↑	↑	↑
	shikimic acid											↑			↓
	threonine							↑			↓			↓	↓	↓			↓	↑			↑	↑	↑	↑		↑
	trans-4-hydroxyproline							↑					↓		↓	↓	↑					↑						↑
	tryptophan			↓	↓	↓	↓				↓	↓		↓	↓	↓			↓		↑		↑					↑
	tyrosine				↓	↓	↓							↓	↓	↓			↓									↑
	valine		↓	↓		↓	↓					↓			↓	↓	↓	↓	↓				↑			↑		↑
Carbohydrates / CCM	1,5-anhydroglucitol				↑	↑	↑		↑	↑	↑	↑		↑	↑	↑			↑	↓	↓		↑		↑		↑
	1-kestose	↑		↑					↑	↑	↑	↑	↑					↑		↓	↓
	3-phosphoglycerate				↑	↑					↓									↑	↑
	4-hydroxybutyric acid			↑	↓	↓	↓						↓	↓	↓	↓			↑			↑						↓
	alpha-ketoglutarate			↑				↑			↑						↑	↑	↑	↓		↑	↓
	arabitol				↓				↑	↑				↓		↓			↑								↑
	citric acid				↓	↓					↑			↓	↓	↓		↑										↓
	digalacturonic acid				↓				↑									↑	↑
	dihydroxyacetone			↑	↓					↓				↓			↓	↓
	fructose	↑		↑				↑	↑	↑			↑			↓						↓				↑	↑	↑
	fructose-1-phosphate							↑	↑	↑			↑		↓	↓	↑	↑				↓			↑
	fructose-6-phosphate	↑		↑				↑	↑	↑	↑	↑	↑				↑	↑	↑			↓
	fumaric acid	↓			↓	↓				↓	↓			↓	↓	↓								↓
	galactinol						↑		↑		↓			↓				↑		↑	↑		↑		↑
	galactitol			↑	↓	↓								↓	↓	↓							↑		↑
	galactose-6-phosphate							↑	↑		↑		↑				↑	↑	↑	↓								↓
	glucoheptulose			↑															↑					↑				↓
	gluconic acid	↑		↑			↑	↓	↓	↓			↑				↓	↓	↓						↑			↑
	gluconic acid lactone	↑	↑	↑	↑		↑				↑		↑											↓	↑			↑
	glucose	↑	↑	↑					↑	↑	↑	↑	↑								↓	↓			↑	↑	↑	↑
	glucose-1-phosphate							↑	↑	↑	↑		↑				↑	↑	↑	↓	↓	↓						↓
	glucose-6-phosphate	↑		↑				↑	↑	↑	↑		↑				↑	↑	↑			↓
	glucuronic acid				↓	↓		↓	↓	↓	↓		↑	↓	↓	↓	↓	↓	↓	↑						↑	↑	↑
	glyceraldehyde-3-phosphate	↑		↑	↓				↑	↑		↑	↑	↓			↑		↑
	glyceric acid	↑	↑	↑	↓			↓		↑	↓		↑	↓	↓	↓	↓		↓	↑	↑		↑			↑	↑	↑
	glycerol									↓				↓			↓		↓
	inositol-4-monophosphate						↑												↑						↑
	isomaltose	↑	↑	↑				↑		↑	↓		↑							↑	↑							↑
	lactic acid	↓																	↑			↑						↓
	lactose			↑							↑	↑	↑															↓
	lyxitol			↑		↓	↓	↓							↓		↓					↑
	malic acid				↓	↓	↓			↓	↓	↓	↓	↓	↓	↓					↑	↑
	maltose	↑	↑	↑	↓	↓				↑			↑		↓			↑		↑		↓						↑
	maltotriose	↑		↑					↑	↑	↑	↑	↑					↑		↓								↑
	mannose	↑	↑						↑	↑	↑	↑	↑		↑			↓	↓			↓				↑	↑	↑
	melezitose			↑						↑	↑	↑	↑							↓	↓							↑
	myo-inositol	↑	↑	↑	↑		↑	↑	↑	↑				↑			↑		↓	↑	↑	↑			↑	↑	↑	↑
	phosphoenolpyruvate														↓	↓	↓	↓						↑
	phosphogluconic acid				↑		↑		↑	↑															↑		↑
	pyruvic acid					↑	↑											↑										↓
	raffinose	↑		↑					↑	↑	↑							↑		↓
	ribitol				↓	↓	↓				↓				↓			↓				↑	↓
	ribonic acid	↑	↑	↑							↓		↑							↑	↑	↑
	ribose		↑	↑		↓	↓					↑	↑		↓	↓	↓	↓	↓							↑	↑	↑
	ribose-5-phosphate						↑	↑	↑		↑	↑				↑	↑	↑	↑	↓								↓
	ribulose-5-phosphate							↑	↑	↑				↓	↓		↑	↑	↑	↓	↓					↓	↓	↓
	saccharic acid																		↑									↓
	sophorose		↑	↑							↓		↑				↓				↑							↑
	sorbitol					↓	↓						↑	↓	↓	↓	↓						↑	↑	↑
	succinic acid																	↑	↑									↓
	sucrose		↑															↑
	threitol			↓		↓					↓			↓	↓					↑								↓
	threonic acid	↑		↑					↑	↑		↓								↑	↑						↑
	xylitol					↓		↓	↓	↓				↓	↓					↑		↓	↑			↓	↓	↓
	xylose												↑							↑		↓
	xylulose				↓	↓		↓			↓			↓	↓	↓	↓	↓	↓	↑						↑	↑	↑
Fatty acids	2,4-hexadienedioic acid					↓									↓
	2-hydroxybutanoic acid		↓					↑	↓	↓	↓	↓	↑		↓							↓				↑		↓
	adipic acid							↓		↓							↓	↓								↑		↓
	arachidic acid			↑											↑							↑
	arachidonic acid	↓															↓									↑
	azelaic acid									↓																↑	↑	↓
	behenic acid										↓			↓		↑						↑					↑
	caprylic acid												↓					↓				↑				↑	↑	↓
	dodecanol	↓												↓				↓								↑	↑	↓
	glutaric acid			↑		↓													↓			↑
	lauric acid										↓			↓			↓	↓	↓								↑
	lignoceric acid						↑											↓								↑
	linoleic acid														↑
	myristic acid			↑				↑		↓								↓	↑							↑	↑	↓
	oleamide					↓		↑								↓										↑
	oleic acid				↑			↑		↑										↑						↑	↑
	palmitic acid							↑		↓				↓	↑			↓				↑		↓		↑	↑	↓
	palmitoleic acid				↑			↑										↓								↑	↑
	pentadecanoic acid			↑						↑			↑					↓								↑	↑	↑
	retinal																		↑			↑
	stearic acid							↑		↓		↑	↓	↓				↓	↑			↑				↑	↑	↓
	succinate semialdehyde				↓	↓	↓							↓	↓	↓			↑						↑			↓
Misc	1,2,4-benzenetriol			↑			↓
	2-aminobutyric acid	↓	↓	↓		↓	↓	↑			↓	↓	↓	↓	↓	↓		↓
	2-hydroxyglutaric acid	↑	↑	↑	↓	↓	↑	↓	↓	↓	↓		↓	↓	↓			↓	↓	↑	↑	↑			↑	↓
	3-(4-hydroxyphenyl)propionic acid													↓					↑									↓
	4-hydroxybenzoate											↑	↓	↓							↓		↑			↑		↓
	6-deoxyglucose			↑		↓			↑								↑		↑	↓			↓
	anabasine					↓	↓								↓	↓
	ascorbic acid				↑	↑	↑			↑	↑	↑		↑	↑	↑	↓	↓	↓	↓	↓						↑	↑
	benzoic acid				↓	↓					↓		↑	↓	↓		↓	↓		↑		↓					↑
	beta-glycerolphosphate			↑				↑	↑			↑	↑		↓			↑
	cholesterol	↑										↑
	ciliatine	↑	↑					↑			↑	↑	↑		↓		↑	↑								↓
	dehydroascorbic acid	↑	↑	↑	↑	↑	↑	↑		↑	↑	↑		↑	↑	↑	↑			↓
	erythritol	↓	↓			↓	↓		↑	↑						↓			↑
	ethanolamine		↑					↓	↓	↓							↓	↓	↓				↑					↑
	glutathione	↑			↓	↓		↑						↓			↑
	glycerol-3-galactoside		↑	↑				↑	↑	↑	↓		↑			↓	↑	↑	↑	↑	↑
	glycerol-alpha-phosphate	↑		↑	↓	↓	↓	↑			↑	↑	↑	↓	↓	↓	↑	↑								↓
	glycolic acid				↓							↓		↓							↑						↑
	hydroquinone													↓						↓		↑	↑			↑		↓
	isothreonic acid	↑		↑	↓			↑	↑											↑	↑	↑		↓		↑	↑
	maleimide					↓				↓									↓
	pantothenic acid							↓									↓	↓	↓								↑
	parabanic acid																	↓								↑
	phenol					↓								↓	↓			↓								↑	↑
	phenylethylamine							↑
	phosphate					↑
	phosphoethanolamine					↓		↑	↑	↑							↑	↑							↑	↑		↑
	pinitol									↓				↑	↑	↑		↑			↓			↓	↓			↓
	putrescine	↑				↓			↓		↑			↓	↓	↓									↑		↓
	pyrophosphate					↑	↑	↑	↑	↑	↑		↓		↑	↑	↑	↑	↑	↓	↑							↓
	salicylaldehyde					↓									↓			↓								↑	↑
	sulfuric acid		↑		↓	↓				↑		↑	↑	↓	↓				↑			↓
	taurine									↑							↑	↑	↑			↓					↓	↓
	terephthalic acid			↑			↓	↑							↓			↓				↑				↑	↑
	urea	↓	↓	↓		↓																↓	↓
	xanthurenic acid				↓					↓			↓													↑	↑	↓
Nucleotides	UDP-N-acetylglucosamine						↑								↓
	UDP-glucuronic acid													↓			↑	↑	↑	↑			↑				↓	↓
	adenine							↑						↓		↓							↑			↑
	adenosine		↓					↑		↑																		↑
	adenosine-5-monophosphate							↑						↑			↑	↑	↑								↓	↓
	cytidine-5-monophosphate							↑					↓									↑
	cytosine					↓							↓		↓					↓		↑
	guanine				↓	↓								↓	↓	↓		↓	↓			↓		↑	↑
	guanosine			↑		↓							↑	↓	↓			↓	↓			↓	↑		↑		↑	↑
	hypoxanthine						↑			↑	↓	↓					↓								↑	↑		↑
	inosine	↑		↑		↓				↑			↑		↓	↓	↓	↓	↓								↑	↑
	inosine-5'-monophosphate				↓	↓	↓	↑						↓	↓	↓	↑	↑	↑							↓	↓
	nicotinamide	↓	↓	↓		↓	↓		↑	↑	↓	↓	↓		↓	↓		↑										↑
	nicotinic acid							↓	↓						↓		↓	↓	↓
	orotic acid	↓								↓			↓						↓									↓
	pyridoxal-5-phosphate										↑								↑	↓
	thymidine		↑								↑	↑	↑					↓	↓		↓	↓			↑		↑	↑
	thymidine-5-phosphate
	thymine					↓			↓						↓			↓	↓
	uracil	↓					↑		↓		↓		↓		↓			↓	↓				↑		↑
	uric acid	↑			↓	↓	↓		↑					↓	↓	↓						↑					↑	↓
	uridine		↑	↑			↑		↓					↓	↓			↓	↓				↑		↑	↑	↑	↑
	xanthine	↓	↓		↓	↓	↓			↑	↓	↓	↓	↓	↓	↓				↑	↑	↑			↑			↑
