# Supplementary material for: The metabolome of Mexican cavefish shows a convergent signature highlighting sugar, antioxidant, and Ageing-Related metabolites
Source: eLife. 2022 Jun 15;11:e74539. doi: 10.7554/eLife.74539 (PMC9200406; doi:10.7554/eLife.74539)
Supplement: Supplementary file 2. [file elife-74539-supp2.csv]

MOLNG-order	Comparision	DE	GO Type	ID	Description	GeneRatio	BgRatio	pvalue	p.adjust	qvalue	Count	ExpCount	Observed_VS_ExpCount	geneID	geneName
MOLNG-2800	pachon_lab_vs_surface_lab	UP	Cellular Components	GO:0016528	sarcoplasm	3/235	11/8458	0.002961866661782	0.2920905966014956	0.2809933937330526	3	0.31	3/0.31	ENSAMXG00000034750/ENSAMXG00000008578/ENSAMXG00000004490	mtmr12/ryr1a/jph3
MOLNG-2800	pachon_lab_vs_surface_lab	UP	Cellular Components	GO:0034703	cation channel complex	3/235	12/8458	0.0038687496238608	0.2920905966014956	0.2809933937330526	3	0.33	3/0.33	ENSAMXG00000012714/ENSAMXG00000013243/ENSAMXG00000021379	cacna1bb/cacnb2b/scn5lab
MOLNG-2800	pachon_lab_vs_surface_lab	UP	Cellular Components	GO:0098590	plasma membrane region	8/235	104/8458	0.0082175201263217	0.4136151796915263	0.397900974537683	8	2.89	8/2.89	ENSAMXG00000003683/ENSAMXG00000042053/ENSAMXG00000012634/ENSAMXG00000036289/ENSAMXG00000031554/ENSAMXG00000021569/ENSAMXG00000020944/ENSAMXG00000002953	bbs2/cavin2a/slc4a2a/cltcl1//chrm4a/vldlr/AP2A2
MOLNG-2800	pachon_lab_vs_surface_lab	UP	Cellular Components	GO:0042995	cell projection	12/235	220/8458	0.0195872241166032	0.4803422963536916	0.4620929724420316	12	6.11	12/6.11	ENSAMXG00000016321/ENSAMXG00000005975/ENSAMXG00000003683/ENSAMXG00000035867/ENSAMXG00000031554/ENSAMXG00000013152/ENSAMXG00000004937/ENSAMXG00000016359/ENSAMXG00000031189/ENSAMXG00000003249/ENSAMXG00000002938/ENSAMXG00000007246	bcr/TENM2/bbs2///si:dkey-33c9.6/dnah9l/sh3pxd2b/ccdc103/kif17/alcamb/CARMIL1
MOLNG-2800	pachon_lab_vs_surface_lab	UP	Cellular Components	GO:0005905	clathrin-coated pit	3/235	22/8458	0.02208144904828	0.4803422963536916	0.4620929724420316	3	0.61	3/0.61	ENSAMXG00000036289/ENSAMXG00000020944/ENSAMXG00000002953	cltcl1/vldlr/AP2A2
MOLNG-2800	pachon_lab_vs_surface_lab	UP	Cellular Components	GO:0005765	lysosomal membrane	4/235	45/8458	0.0355743084880206	0.4803422963536916	0.4620929724420316	4	1.25	4/1.25	ENSAMXG00000040472/ENSAMXG00000032593/ENSAMXG00000013961/ENSAMXG00000034120	gba/si:ch211-212k18.7/abcb9/slc29a3
MOLNG-2800	pachon_lab_vs_surface_lab	UP	Cellular Components	GO:0098852	lytic vacuole membrane	4/235	45/8458	0.0355743084880206	0.4803422963536916	0.4620929724420316	4	1.25	4/1.25	ENSAMXG00000040472/ENSAMXG00000032593/ENSAMXG00000013961/ENSAMXG00000034120	gba/si:ch211-212k18.7/abcb9/slc29a3
MOLNG-2800	pachon_lab_vs_surface_lab	UP	Cellular Components	GO:0030125	clathrin vesicle coat	2/235	11/8458	0.0358392931883042	0.4803422963536916	0.4620929724420316	2	0.31	2/0.31	ENSAMXG00000036289/ENSAMXG00000002953	cltcl1/AP2A2
MOLNG-2800	pachon_lab_vs_surface_lab	UP	Cellular Components	GO:0030120	vesicle coat	3/235	27/8458	0.0379139515156637	0.4803422963536916	0.4620929724420316	3	0.75	3/0.75	ENSAMXG00000011030/ENSAMXG00000036289/ENSAMXG00000002953	si:dkey-9k7.3/cltcl1/AP2A2
MOLNG-2800	pachon_lab_vs_surface_lab	UP	Cellular Components	GO:0036477	somatodendritic compartment	3/235	27/8458	0.0379139515156637	0.4803422963536916	0.4620929724420316	3	0.75	3/0.75	ENSAMXG00000016321/ENSAMXG00000004485/ENSAMXG00000013152	bcr/galn/si:dkey-33c9.6
MOLNG-2800	pachon_lab_vs_surface_lab	UP	Cellular Components	GO:0030658	transport vesicle membrane	3/235	28/8458	0.041618873914609	0.4803422963536916	0.4620929724420316	3	0.78	3/0.78	ENSAMXG00000011030/ENSAMXG00000036289/ENSAMXG00000011074	si:dkey-9k7.3/cltcl1/syt2a
MOLNG-2800	pachon_lab_vs_surface_lab	UP	Cellular Components	GO:0034702	ion channel complex	3/235	28/8458	0.041618873914609	0.4803422963536916	0.4620929724420316	3	0.78	3/0.78	ENSAMXG00000012714/ENSAMXG00000013243/ENSAMXG00000021379	cacna1bb/cacnb2b/scn5lab
MOLNG-2800	pachon_lab_vs_surface_lab	UP	Cellular Components	GO:0030424	axon	3/235	29/8458	0.045498984814981	0.4803422963536916	0.4620929724420316	3	0.81	3/0.81	ENSAMXG00000016321/ENSAMXG00000013152/ENSAMXG00000002938	bcr/si:dkey-33c9.6/alcamb
MOLNG-2800	pachon_lab_vs_surface_lab	UP	Biological Process	GO:0015074	DNA integration	16/277	58/9643	3.778387664107368e-12	3.5403492412686035e-09	3.5403492412686035e-09	16	1.67	16/1.67	ENSAMXG00000033138/ENSAMXG00000036506/ENSAMXG00000039114/ENSAMXG00000038483/ENSAMXG00000040613/ENSAMXG00000031305/ENSAMXG00000040932/ENSAMXG00000043821/ENSAMXG00000038578/ENSAMXG00000041546/ENSAMXG00000035494/ENSAMXG00000032571/ENSAMXG00000037931/ENSAMXG00000030747/ENSAMXG00000037673/ENSAMXG00000035834	///////////////
MOLNG-2800	pachon_lab_vs_surface_lab	UP	Biological Process	GO:0006278	RNA-dependent DNA biosynthetic process	7/277	20/9643	8.41721801123334e-07	0.000394346663826282	0.000394346663826282	7	0.57	7/0.57	ENSAMXG00000039114/ENSAMXG00000031305/ENSAMXG00000038578/ENSAMXG00000032571/ENSAMXG00000030747/ENSAMXG00000037673/ENSAMXG00000042832	//////tert
MOLNG-2800	pachon_lab_vs_surface_lab	UP	Biological Process	GO:0006259	DNA metabolic process	22/277	289/9643	2.8864634383079525e-05	0.0090153874723151	0.0090153874723151	22	8.3	22/8.3	ENSAMXG00000033138/ENSAMXG00000036506/ENSAMXG00000039114/ENSAMXG00000038483/ENSAMXG00000040613/ENSAMXG00000031305/ENSAMXG00000040932/ENSAMXG00000043821/ENSAMXG00000038708/ENSAMXG00000038578/ENSAMXG00000041546/ENSAMXG00000013672/ENSAMXG00000015192/ENSAMXG00000035494/ENSAMXG00000032571/ENSAMXG00000035975/ENSAMXG00000037931/ENSAMXG00000012564/ENSAMXG00000030747/ENSAMXG00000037673/ENSAMXG00000035834/…	///////////rad51/parp3/////stn1////tert
MOLNG-2800	pachon_lab_vs_surface_lab	UP	Biological Process	GO:0071897	DNA biosynthetic process	7/277	39/9643	0.00010457055265448643	0.0244956519593134	0.0244956519593134	7	1.12	7/1.12	ENSAMXG00000039114/ENSAMXG00000031305/ENSAMXG00000038578/ENSAMXG00000032571/ENSAMXG00000030747/ENSAMXG00000037673/ENSAMXG00000042832	//////tert
MOLNG-2800	pachon_lab_vs_surface_lab	UP	Biological Process	GO:0000723	telomere maintenance	4/277	20/9643	0.0022440132679497	0.350440072011488	0.350440072011488	4	0.57	4/0.57	ENSAMXG00000038708/ENSAMXG00000035975/ENSAMXG00000012564/ENSAMXG00000042832	//stn1/tert
MOLNG-2800	pachon_lab_vs_surface_lab	UP	Biological Process	GO:0032200	telomere organization	4/277	20/9643	0.0022440132679497	0.350440072011488	0.350440072011488	4	0.57	4/0.57	ENSAMXG00000038708/ENSAMXG00000035975/ENSAMXG00000012564/ENSAMXG00000042832	//stn1/tert
MOLNG-2800	pachon_lab_vs_surface_lab	UP	Biological Process	GO:0007601	visual perception	4/277	22/9643	0.003238508363799	0.4334974766971072	0.4334974766971071	4	0.63	4/0.63	ENSAMXG00000035630/ENSAMXG00000000107/ENSAMXG00000035849/ENSAMXG00000032621	cnga3a/cngb3.2/pdca/pde6gb
MOLNG-2800	pachon_lab_vs_surface_lab	UP	Biological Process	GO:0050953	sensory perception of light stimulus	4/277	23/9643	0.0038329522210986	0.442985013913344	0.442985013913344	4	0.66	4/0.66	ENSAMXG00000035630/ENSAMXG00000000107/ENSAMXG00000035849/ENSAMXG00000032621	cnga3a/cngb3.2/pdca/pde6gb
MOLNG-2800	pachon_lab_vs_surface_lab	UP	Biological Process	GO:0006471	protein ADP-ribosylation	3/277	12/9643	0.0042549254271292	0.442985013913344	0.442985013913344	3	0.34	3/0.34	ENSAMXG00000015192/ENSAMXG00000043556/ENSAMXG00000032972	parp3//
MOLNG-2800	pachon_lab_vs_surface_lab	UP	Biological Process	GO:0034220	ion transmembrane transport	16/277	288/9643	0.0088831882218832	0.7591532675234408	0.7591532675234408	16	8.27	16/8.27	ENSAMXG00000035630/ENSAMXG00000014532/ENSAMXG00000014880/ENSAMXG00000000107/ENSAMXG00000012714/ENSAMXG00000004376/ENSAMXG00000012634/ENSAMXG00000013243/ENSAMXG00000029077/ENSAMXG00000004858/ENSAMXG00000033104/ENSAMXG00000039836/ENSAMXG00000009418/ENSAMXG00000008578/ENSAMXG00000021379/ENSAMXG00000014290	cnga3a/slc25a13/kcnk10b/cngb3.2/cacna1bb/trpv4/slc4a2a/cacnb2b/cox4i1l/atp6v0a1b/si:dkey-49c17.4/kcnh1b/atp2b1b/ryr1a/scn5lab/atp1a3a
MOLNG-2800	pachon_lab_vs_surface_lab	UP	Biological Process	GO:0006897	endocytosis	10/277	145/9643	0.0089121514864011	0.7591532675234408	0.7591532675234408	10	4.17	10/4.17	ENSAMXG00000035034/ENSAMXG00000002156/ENSAMXG00000012779/ENSAMXG00000034797/ENSAMXG00000018839/ENSAMXG00000039229/ENSAMXG00000016596/ENSAMXG00000020944/ENSAMXG00000002953/ENSAMXG00000036531	/pla2r1/dnm3a/zgc:112492/LRP8//si:ch73-127m5.1/vldlr/AP2A2/
MOLNG-2800	pachon_lab_vs_surface_lab	UP	Biological Process	GO:0006811	ion transport	23/277	483/9643	0.0118281072923915	0.9235780444142382	0.9235780444142382	23	13.87	23/13.87	ENSAMXG00000035630/ENSAMXG00000014532/ENSAMXG00000014880/ENSAMXG00000001709/ENSAMXG00000000107/ENSAMXG00000012714/ENSAMXG00000004376/ENSAMXG00000000590/ENSAMXG00000012634/ENSAMXG00000013243/ENSAMXG00000029077/ENSAMXG00000003998/ENSAMXG00000004858/ENSAMXG00000033104/ENSAMXG00000039836/ENSAMXG00000009418/ENSAMXG00000008578/ENSAMXG00000021379/ENSAMXG00000014290/ENSAMXG00000002268/ENSAMXG00000001413/…	cnga3a/slc25a13/kcnk10b/slc13a4/cngb3.2/cacna1bb/trpv4/atp8b4/slc4a2a/cacnb2b/cox4i1l/proca1/atp6v0a1b/si:dkey-49c17.4/kcnh1b/atp2b1b/ryr1a/scn5lab/atp1a3a/zgc:172271/ATP11B//slc11a2
MOLNG-2800	pachon_lab_vs_surface_lab	UP	Biological Process	GO:0030001	metal ion transport	11/277	183/9643	0.0164319247631654	0.9340156717488396	0.9340156717488396	11	5.26	11/5.26	ENSAMXG00000014880/ENSAMXG00000001709/ENSAMXG00000012714/ENSAMXG00000013243/ENSAMXG00000039836/ENSAMXG00000009418/ENSAMXG00000008578/ENSAMXG00000021379/ENSAMXG00000014290/ENSAMXG00000033597/ENSAMXG00000024713	kcnk10b/slc13a4/cacna1bb/cacnb2b/kcnh1b/atp2b1b/ryr1a/scn5lab/atp1a3a//slc11a2
MOLNG-2800	pachon_lab_vs_surface_lab	UP	Biological Process	GO:0098655	cation transmembrane transport	12/277	211/9643	0.0186191554502948	0.9340156717488396	0.9340156717488396	12	6.06	12/6.06	ENSAMXG00000035630/ENSAMXG00000014880/ENSAMXG00000000107/ENSAMXG00000012714/ENSAMXG00000013243/ENSAMXG00000029077/ENSAMXG00000004858/ENSAMXG00000039836/ENSAMXG00000009418/ENSAMXG00000008578/ENSAMXG00000021379/ENSAMXG00000014290	cnga3a/kcnk10b/cngb3.2/cacna1bb/cacnb2b/cox4i1l/atp6v0a1b/kcnh1b/atp2b1b/ryr1a/scn5lab/atp1a3a
MOLNG-2800	pachon_lab_vs_surface_lab	UP	Biological Process	GO:0007600	sensory perception	5/277	54/9643	0.0189542243765667	0.9340156717488396	0.9340156717488396	5	1.55	5/1.55	ENSAMXG00000035630/ENSAMXG00000000107/ENSAMXG00000003217/ENSAMXG00000035849/ENSAMXG00000032621	cnga3a/cngb3.2//pdca/pde6gb
MOLNG-2800	pachon_lab_vs_surface_lab	UP	Biological Process	GO:0006812	cation transport	15/277	291/9643	0.0206666589611558	0.9340156717488396	0.9340156717488396	15	8.36	15/8.36	ENSAMXG00000035630/ENSAMXG00000014880/ENSAMXG00000001709/ENSAMXG00000000107/ENSAMXG00000012714/ENSAMXG00000013243/ENSAMXG00000029077/ENSAMXG00000004858/ENSAMXG00000039836/ENSAMXG00000009418/ENSAMXG00000008578/ENSAMXG00000021379/ENSAMXG00000014290/ENSAMXG00000033597/ENSAMXG00000024713	cnga3a/kcnk10b/slc13a4/cngb3.2/cacna1bb/cacnb2b/cox4i1l/atp6v0a1b/kcnh1b/atp2b1b/ryr1a/scn5lab/atp1a3a//slc11a2
MOLNG-2800	pachon_lab_vs_surface_lab	UP	Biological Process	GO:0008203	cholesterol metabolic process	3/277	22/9643	0.0241112979662782	0.9340156717488396	0.9340156717488396	3	0.63	3/0.63	ENSAMXG00000040472/ENSAMXG00000044043/ENSAMXG00000020944	gba/tm7sf2/vldlr
MOLNG-2800	pachon_lab_vs_surface_lab	UP	Biological Process	GO:0003341	cilium movement	3/277	23/9643	0.0271530498280552	0.9340156717488396	0.9340156717488396	3	0.66	3/0.66	ENSAMXG00000004937/ENSAMXG00000031189/ENSAMXG00000029380	dnah9l/ccdc103/glis2b
MOLNG-2800	pachon_lab_vs_surface_lab	UP	Biological Process	GO:0090305	nucleic acid phosphodiester bond hydrolysis	7/277	103/9643	0.0285929240099569	0.9340156717488396	0.9340156717488396	7	2.96	7/2.96	ENSAMXG00000001736/ENSAMXG00000038483/ENSAMXG00000040932/ENSAMXG00000043957/ENSAMXG00000032571/ENSAMXG00000030747/ENSAMXG00000017465	zc3h12a//////helz2
MOLNG-2800	pachon_lab_vs_surface_lab	UP	Biological Process	GO:0071696	ectodermal placode development	2/277	10/9643	0.0317742336886441	0.9340156717488396	0.9340156717488396	2	0.29	2/0.29	ENSAMXG00000015192/ENSAMXG00000037252	parp3/gata3
MOLNG-2800	pachon_lab_vs_surface_lab	UP	Biological Process	GO:0007018	microtubule-based movement	6/277	84/9643	0.0335036752781646	0.9340156717488396	0.9340156717488396	6	2.41	6/2.41	ENSAMXG00000005950/ENSAMXG00000011281/ENSAMXG00000004937/ENSAMXG00000031189/ENSAMXG00000003249/ENSAMXG00000029380	kif1ab/kif11/dnah9l/ccdc103/kif17/glis2b
MOLNG-2800	pachon_lab_vs_surface_lab	UP	Biological Process	GO:0016125	sterol metabolic process	3/277	25/9643	0.0338198171699933	0.9340156717488396	0.9340156717488396	3	0.72	3/0.72	ENSAMXG00000040472/ENSAMXG00000044043/ENSAMXG00000020944	gba/tm7sf2/vldlr
MOLNG-2800	pachon_lab_vs_surface_lab	UP	Biological Process	GO:0070588	calcium ion transmembrane transport	4/277	43/9643	0.0342069189661998	0.9340156717488396	0.9340156717488396	4	1.24	4/1.24	ENSAMXG00000012714/ENSAMXG00000013243/ENSAMXG00000009418/ENSAMXG00000008578	cacna1bb/cacnb2b/atp2b1b/ryr1a
MOLNG-2800	pachon_lab_vs_surface_lab	UP	Biological Process	GO:0098662	inorganic cation transmembrane transport	10/277	181/9643	0.0358616525317837	0.9340156717488396	0.9340156717488396	10	5.2	10/5.2	ENSAMXG00000014880/ENSAMXG00000012714/ENSAMXG00000013243/ENSAMXG00000029077/ENSAMXG00000004858/ENSAMXG00000039836/ENSAMXG00000009418/ENSAMXG00000008578/ENSAMXG00000021379/ENSAMXG00000014290	kcnk10b/cacna1bb/cacnb2b/cox4i1l/atp6v0a1b/kcnh1b/atp2b1b/ryr1a/scn5lab/atp1a3a
MOLNG-2800	pachon_lab_vs_surface_lab	UP	Biological Process	GO:0008202	steroid metabolic process	4/277	44/9643	0.0368076998333691	0.9340156717488396	0.9340156717488396	4	1.26	4/1.26	ENSAMXG00000040472/ENSAMXG00000037805/ENSAMXG00000044043/ENSAMXG00000020944	gba/hsd17b3/tm7sf2/vldlr
MOLNG-2800	pachon_lab_vs_surface_lab	UP	Biological Process	GO:0055072	iron ion homeostasis	3/277	26/9643	0.0374420903479154	0.9340156717488396	0.9340156717488396	3	0.75	3/0.75	ENSAMXG00000002268/ENSAMXG00000033597/ENSAMXG00000035265	zgc:172271//steap3
MOLNG-2800	pachon_lab_vs_surface_lab	UP	Biological Process	GO:1902652	secondary alcohol metabolic process	3/277	26/9643	0.0374420903479154	0.9340156717488396	0.9340156717488396	3	0.75	3/0.75	ENSAMXG00000040472/ENSAMXG00000044043/ENSAMXG00000020944	gba/tm7sf2/vldlr
MOLNG-2800	pachon_lab_vs_surface_lab	UP	Biological Process	GO:0006310	DNA recombination	4/277	46/9643	0.0423421579481991	0.9340156717488396	0.9340156717488396	4	1.32	4/1.32	ENSAMXG00000038708/ENSAMXG00000013672/ENSAMXG00000035494/ENSAMXG00000035975	/rad51//
MOLNG-2800	pachon_lab_vs_surface_lab	UP	Biological Process	GO:0003351	epithelial cilium movement involved in extracellular fluid movement	2/277	12/9643	0.0448819147739077	0.9340156717488396	0.9340156717488396	2	0.34	2/0.34	ENSAMXG00000004937/ENSAMXG00000031189	dnah9l/ccdc103
MOLNG-2800	pachon_lab_vs_surface_lab	UP	Biological Process	GO:0006858	extracellular transport	2/277	12/9643	0.0448819147739077	0.9340156717488396	0.9340156717488396	2	0.34	2/0.34	ENSAMXG00000004937/ENSAMXG00000031189	dnah9l/ccdc103
MOLNG-2800	pachon_lab_vs_surface_lab	UP	Biological Process	GO:0030335	positive regulation of cell migration	2/277	12/9643	0.0448819147739077	0.9340156717488396	0.9340156717488396	2	0.34	2/0.34	ENSAMXG00000037252/ENSAMXG00000007246	gata3/CARMIL1
MOLNG-2800	pachon_lab_vs_surface_lab	UP	Biological Process	GO:0048702	embryonic neurocranium morphogenesis	2/277	12/9643	0.0448819147739077	0.9340156717488396	0.9340156717488396	2	0.34	2/0.34	ENSAMXG00000040572/ENSAMXG00000037252	rbm24a/gata3
MOLNG-2800	pachon_lab_vs_surface_lab	UP	Biological Process	GO:0051272	positive regulation of cellular component movement	2/277	12/9643	0.0448819147739077	0.9340156717488396	0.9340156717488396	2	0.34	2/0.34	ENSAMXG00000037252/ENSAMXG00000007246	gata3/CARMIL1
MOLNG-2800	pachon_lab_vs_surface_lab	UP	Biological Process	GO:2000147	positive regulation of cell motility	2/277	12/9643	0.0448819147739077	0.9340156717488396	0.9340156717488396	2	0.34	2/0.34	ENSAMXG00000037252/ENSAMXG00000007246	gata3/CARMIL1
MOLNG-2800	pachon_lab_vs_surface_lab	UP	Biological Process	GO:0060249	anatomical structure homeostasis	5/277	68/9643	0.0453677656396268	0.9340156717488396	0.9340156717488396	5	1.95	5/1.95	ENSAMXG00000038708/ENSAMXG00000035975/ENSAMXG00000012564/ENSAMXG00000040472/ENSAMXG00000042832	//stn1/gba/tert
MOLNG-2800	pachon_lab_vs_surface_lab	UP	Biological Process	GO:0060562	epithelial tube morphogenesis	7/277	114/9643	0.0457214663282062	0.9340156717488396	0.9340156717488396	7	3.27	7/3.27	ENSAMXG00000040115/ENSAMXG00000037017/ENSAMXG00000021379/ENSAMXG00000040572/ENSAMXG00000037252/ENSAMXG00000031189/ENSAMXG00000029380	ponzr1/mdka/scn5lab/rbm24a/gata3/ccdc103/glis2b
MOLNG-2800	pachon_lab_vs_surface_lab	UP	Biological Process	GO:0034765	regulation of ion transmembrane transport	3/277	29/9643	0.0494393369569219	0.9340156717488396	0.9340156717488396	3	0.83	3/0.83	ENSAMXG00000012714/ENSAMXG00000039836/ENSAMXG00000021379	cacna1bb/kcnh1b/scn5lab
MOLNG-2800	pachon_lab_vs_surface_lab	UP	Molecular Functions	GO:0003964	RNA-directed DNA polymerase activity	7/321	16/11006	1.5347371443060702e-07	4.696295661576575e-05	4.1518678535437904e-05	7	0.47	7/0.47	ENSAMXG00000039114/ENSAMXG00000031305/ENSAMXG00000038578/ENSAMXG00000032571/ENSAMXG00000030747/ENSAMXG00000037673/ENSAMXG00000042832	//////tert
MOLNG-2800	pachon_lab_vs_surface_lab	UP	Molecular Functions	GO:0034061	DNA polymerase activity	7/321	26/11006	6.860385513458567e-06	0.0010496389835591	0.0009279574089257116	7	0.76	7/0.76	ENSAMXG00000039114/ENSAMXG00000031305/ENSAMXG00000038578/ENSAMXG00000032571/ENSAMXG00000030747/ENSAMXG00000037673/ENSAMXG00000042832	//////tert
MOLNG-2800	pachon_lab_vs_surface_lab	UP	Molecular Functions	GO:0005261	cation channel activity	8/321	73/11006	0.0012403789782064	0.0785302462123084	0.0694264646596603	8	2.13	8/2.13	ENSAMXG00000035630/ENSAMXG00000014880/ENSAMXG00000000107/ENSAMXG00000012714/ENSAMXG00000013243/ENSAMXG00000039836/ENSAMXG00000008578/ENSAMXG00000021379	cnga3a/kcnk10b/cngb3.2/cacna1bb/cacnb2b/kcnh1b/ryr1a/scn5lab
MOLNG-2800	pachon_lab_vs_surface_lab	UP	Molecular Functions	GO:0140097	catalytic activity, acting on DNA	10/321	111/11006	0.0014738523447866	0.0785302462123084	0.0694264646596603	10	3.24	10/3.24	ENSAMXG00000039114/ENSAMXG00000031305/ENSAMXG00000038708/ENSAMXG00000038578/ENSAMXG00000013672/ENSAMXG00000032571/ENSAMXG00000035975/ENSAMXG00000030747/ENSAMXG00000037673/ENSAMXG00000042832	////rad51/////tert
MOLNG-2800	pachon_lab_vs_surface_lab	UP	Molecular Functions	GO:0015318	inorganic molecular entity transmembrane transporter activity	18/321	283/11006	0.001610882409378	0.0785302462123084	0.0694264646596603	18	8.25	18/8.25	ENSAMXG00000016875/ENSAMXG00000035630/ENSAMXG00000014532/ENSAMXG00000014880/ENSAMXG00000000107/ENSAMXG00000012714/ENSAMXG00000004376/ENSAMXG00000012634/ENSAMXG00000013243/ENSAMXG00000029077/ENSAMXG00000004858/ENSAMXG00000033104/ENSAMXG00000039836/ENSAMXG00000009418/ENSAMXG00000008578/ENSAMXG00000021379/ENSAMXG00000014290/ENSAMXG00000024713	slc28a1/cnga3a/slc25a13/kcnk10b/cngb3.2/cacna1bb/trpv4/slc4a2a/cacnb2b/cox4i1l/atp6v0a1b/si:dkey-49c17.4/kcnh1b/atp2b1b/ryr1a/scn5lab/atp1a3a/slc11a2
MOLNG-2800	pachon_lab_vs_surface_lab	UP	Molecular Functions	GO:0046873	metal ion transmembrane transporter activity	10/321	113/11006	0.0016870519561168	0.0785302462123084	0.0694264646596603	10	3.3	10/3.3	ENSAMXG00000016875/ENSAMXG00000014880/ENSAMXG00000012714/ENSAMXG00000013243/ENSAMXG00000039836/ENSAMXG00000009418/ENSAMXG00000008578/ENSAMXG00000021379/ENSAMXG00000014290/ENSAMXG00000024713	slc28a1/kcnk10b/cacna1bb/cacnb2b/kcnh1b/atp2b1b/ryr1a/scn5lab/atp1a3a/slc11a2
MOLNG-2800	pachon_lab_vs_surface_lab	UP	Molecular Functions	GO:0022890	inorganic cation transmembrane transporter activity	14/321	198/11006	0.0019830217608496	0.0785302462123084	0.0694264646596603	14	5.77	14/5.77	ENSAMXG00000016875/ENSAMXG00000035630/ENSAMXG00000014880/ENSAMXG00000000107/ENSAMXG00000012714/ENSAMXG00000013243/ENSAMXG00000029077/ENSAMXG00000004858/ENSAMXG00000039836/ENSAMXG00000009418/ENSAMXG00000008578/ENSAMXG00000021379/ENSAMXG00000014290/ENSAMXG00000024713	slc28a1/cnga3a/kcnk10b/cngb3.2/cacna1bb/cacnb2b/cox4i1l/atp6v0a1b/kcnh1b/atp2b1b/ryr1a/scn5lab/atp1a3a/slc11a2
MOLNG-2800	pachon_lab_vs_surface_lab	UP	Molecular Functions	GO:0005216	ion channel activity	10/321	116/11006	0.0020530783323479	0.0785302462123084	0.0694264646596603	10	3.38	10/3.38	ENSAMXG00000035630/ENSAMXG00000014880/ENSAMXG00000000107/ENSAMXG00000012714/ENSAMXG00000004376/ENSAMXG00000013243/ENSAMXG00000033104/ENSAMXG00000039836/ENSAMXG00000008578/ENSAMXG00000021379	cnga3a/kcnk10b/cngb3.2/cacna1bb/trpv4/cacnb2b/si:dkey-49c17.4/kcnh1b/ryr1a/scn5lab
MOLNG-2800	pachon_lab_vs_surface_lab	UP	Molecular Functions	GO:0016779	nucleotidyltransferase activity	9/321	99/11006	0.0023629136102498	0.0798203792244158	0.0705670363284309	9	2.89	9/2.89	ENSAMXG00000039114/ENSAMXG00000031305/ENSAMXG00000040932/ENSAMXG00000038578/ENSAMXG00000032571/ENSAMXG00000030747/ENSAMXG00000017691/ENSAMXG00000037673/ENSAMXG00000042832	//////tent4a//tert
MOLNG-2800	pachon_lab_vs_surface_lab	UP	Molecular Functions	GO:0022836	gated channel activity	8/321	82/11006	0.0026241051008128	0.0798203792244158	0.0705670363284309	8	2.39	8/2.39	ENSAMXG00000035630/ENSAMXG00000000107/ENSAMXG00000012714/ENSAMXG00000013243/ENSAMXG00000033104/ENSAMXG00000039836/ENSAMXG00000008578/ENSAMXG00000021379	cnga3a/cngb3.2/cacna1bb/cacnb2b/si:dkey-49c17.4/kcnh1b/ryr1a/scn5lab
MOLNG-2800	pachon_lab_vs_surface_lab	UP	Molecular Functions	GO:0005088	Ras guanyl-nucleotide exchange factor activity	4/321	21/11006	0.002869360037479	0.0798203792244158	0.0705670363284309	4	0.61	4/0.61	ENSAMXG00000007413/ENSAMXG00000020463/ENSAMXG00000036204/ENSAMXG00000016687	arhgef12b/trioa/arhgef25b/rgl1
MOLNG-2800	pachon_lab_vs_surface_lab	UP	Molecular Functions	GO:0008324	cation transmembrane transporter activity	14/321	213/11006	0.003861593467522	0.0971693336646592	0.0859047772680337	14	6.21	14/6.21	ENSAMXG00000016875/ENSAMXG00000035630/ENSAMXG00000014880/ENSAMXG00000000107/ENSAMXG00000012714/ENSAMXG00000013243/ENSAMXG00000029077/ENSAMXG00000004858/ENSAMXG00000039836/ENSAMXG00000009418/ENSAMXG00000008578/ENSAMXG00000021379/ENSAMXG00000014290/ENSAMXG00000024713	slc28a1/cnga3a/kcnk10b/cngb3.2/cacna1bb/cacnb2b/cox4i1l/atp6v0a1b/kcnh1b/atp2b1b/ryr1a/scn5lab/atp1a3a/slc11a2
MOLNG-2800	pachon_lab_vs_surface_lab	UP	Molecular Functions	GO:0005089	Rho guanyl-nucleotide exchange factor activity	3/321	12/11006	0.0044456557885791	0.0971693336646592	0.0859047772680337	3	0.35	3/0.35	ENSAMXG00000007413/ENSAMXG00000020463/ENSAMXG00000036204	arhgef12b/trioa/arhgef25b
MOLNG-2800	pachon_lab_vs_surface_lab	UP	Molecular Functions	GO:0005217	intracellular ligand-gated ion channel activity	3/321	12/11006	0.0044456557885791	0.0971693336646592	0.0859047772680337	3	0.35	3/0.35	ENSAMXG00000035630/ENSAMXG00000000107/ENSAMXG00000008578	cnga3a/cngb3.2/ryr1a
MOLNG-2800	pachon_lab_vs_surface_lab	UP	Molecular Functions	GO:0015075	ion transmembrane transporter activity	19/321	340/11006	0.0051173564640289	0.104394071866191	0.0922919727196804	19	9.92	19/9.92	ENSAMXG00000016875/ENSAMXG00000035630/ENSAMXG00000014532/ENSAMXG00000014880/ENSAMXG00000000107/ENSAMXG00000012714/ENSAMXG00000004376/ENSAMXG00000012634/ENSAMXG00000013243/ENSAMXG00000029077/ENSAMXG00000004858/ENSAMXG00000033104/ENSAMXG00000039836/ENSAMXG00000009418/ENSAMXG00000008578/ENSAMXG00000021379/ENSAMXG00000016140/ENSAMXG00000014290/ENSAMXG00000024713	slc28a1/cnga3a/slc25a13/kcnk10b/cngb3.2/cacna1bb/trpv4/slc4a2a/cacnb2b/cox4i1l/atp6v0a1b/si:dkey-49c17.4/kcnh1b/atp2b1b/ryr1a/scn5lab/slc25a22a/atp1a3a/slc11a2
MOLNG-2800	pachon_lab_vs_surface_lab	UP	Molecular Functions	GO:0015267	channel activity	10/321	136/11006	0.0064315935431654	0.1157686837769789	0.1023479591698782	10	3.97	10/3.97	ENSAMXG00000035630/ENSAMXG00000014880/ENSAMXG00000000107/ENSAMXG00000012714/ENSAMXG00000004376/ENSAMXG00000013243/ENSAMXG00000033104/ENSAMXG00000039836/ENSAMXG00000008578/ENSAMXG00000021379	cnga3a/kcnk10b/cngb3.2/cacna1bb/trpv4/cacnb2b/si:dkey-49c17.4/kcnh1b/ryr1a/scn5lab
MOLNG-2800	pachon_lab_vs_surface_lab	UP	Molecular Functions	GO:0022803	passive transmembrane transporter activity	10/321	136/11006	0.0064315935431654	0.1157686837769789	0.1023479591698782	10	3.97	10/3.97	ENSAMXG00000035630/ENSAMXG00000014880/ENSAMXG00000000107/ENSAMXG00000012714/ENSAMXG00000004376/ENSAMXG00000013243/ENSAMXG00000033104/ENSAMXG00000039836/ENSAMXG00000008578/ENSAMXG00000021379	cnga3a/kcnk10b/cngb3.2/cacna1bb/trpv4/cacnb2b/si:dkey-49c17.4/kcnh1b/ryr1a/scn5lab
MOLNG-2800	pachon_lab_vs_surface_lab	UP	Molecular Functions	GO:0038024	cargo receptor activity	6/321	59/11006	0.0072209055864262	0.1227553949692468	0.1085247213866407	6	1.72	6/1.72	ENSAMXG00000035034/ENSAMXG00000034797/ENSAMXG00000039229/ENSAMXG00000016596/ENSAMXG00000020944/ENSAMXG00000036531	/zgc:112492//si:ch73-127m5.1/vldlr/
MOLNG-2800	pachon_lab_vs_surface_lab	UP	Molecular Functions	GO:0015085	calcium ion transmembrane transporter activity	4/321	30/11006	0.0106970600687116	0.1722789674224085	0.1523071710614345	4	0.87	4/0.87	ENSAMXG00000012714/ENSAMXG00000013243/ENSAMXG00000009418/ENSAMXG00000008578	cacna1bb/cacnb2b/atp2b1b/ryr1a
MOLNG-2800	pachon_lab_vs_surface_lab	UP	Molecular Functions	GO:0004620	phospholipase activity	5/321	50/11006	0.0148221826325392	0.1982142820378988	0.1752358805770209	5	1.46	5/1.46	ENSAMXG00000044082/ENSAMXG00000006275/ENSAMXG00000003998/ENSAMXG00000017456/ENSAMXG00000032795	plcd3b/plcd3b/proca1/PLAAT4/plcd4a
MOLNG-2800	pachon_lab_vs_surface_lab	UP	Molecular Functions	GO:0015276	ligand-gated ion channel activity	4/321	33/11006	0.0149210288816771	0.1982142820378988	0.1752358805770209	4	0.96	4/0.96	ENSAMXG00000035630/ENSAMXG00000000107/ENSAMXG00000033104/ENSAMXG00000008578	cnga3a/cngb3.2/si:dkey-49c17.4/ryr1a
MOLNG-2800	pachon_lab_vs_surface_lab	UP	Molecular Functions	GO:0022834	ligand-gated channel activity	4/321	33/11006	0.0149210288816771	0.1982142820378988	0.1752358805770209	4	0.96	4/0.96	ENSAMXG00000035630/ENSAMXG00000000107/ENSAMXG00000033104/ENSAMXG00000008578	cnga3a/cngb3.2/si:dkey-49c17.4/ryr1a
MOLNG-2800	pachon_lab_vs_surface_lab	UP	Molecular Functions	GO:0005044	scavenger receptor activity	5/321	51/11006	0.0160524797059085	0.1982142820378988	0.1752358805770209	5	1.49	5/1.49	ENSAMXG00000035034/ENSAMXG00000034797/ENSAMXG00000039229/ENSAMXG00000016596/ENSAMXG00000036531	/zgc:112492//si:ch73-127m5.1/
MOLNG-2800	pachon_lab_vs_surface_lab	UP	Molecular Functions	GO:0004435	phosphatidylinositol phospholipase C activity	3/321	19/11006	0.0168417363823051	0.1982142820378988	0.1752358805770209	3	0.55	3/0.55	ENSAMXG00000044082/ENSAMXG00000006275/ENSAMXG00000032795	plcd3b/plcd3b/plcd4a
MOLNG-2800	pachon_lab_vs_surface_lab	UP	Molecular Functions	GO:0004629	phospholipase C activity	3/321	19/11006	0.0168417363823051	0.1982142820378988	0.1752358805770209	3	0.55	3/0.55	ENSAMXG00000044082/ENSAMXG00000006275/ENSAMXG00000032795	plcd3b/plcd3b/plcd4a
MOLNG-2800	pachon_lab_vs_surface_lab	UP	Molecular Functions	GO:0099094	ligand-gated cation channel activity	3/321	19/11006	0.0168417363823051	0.1982142820378988	0.1752358805770209	3	0.55	3/0.55	ENSAMXG00000035630/ENSAMXG00000000107/ENSAMXG00000008578	cnga3a/cngb3.2/ryr1a
MOLNG-2800	pachon_lab_vs_surface_lab	UP	Molecular Functions	GO:0003777	microtubule motor activity	4/321	36/11006	0.0200697393425104	0.2274570458817854	0.2010886164142375	4	1.05	4/1.05	ENSAMXG00000005950/ENSAMXG00000011281/ENSAMXG00000004937/ENSAMXG00000003249	kif1ab/kif11/dnah9l/kif17
MOLNG-2800	pachon_lab_vs_surface_lab	UP	Molecular Functions	GO:0030276	clathrin binding	3/321	21/11006	0.0221485471848172	0.2420519799483604	0.2139916024999264	3	0.61	3/0.61	ENSAMXG00000008811/ENSAMXG00000036289/ENSAMXG00000002953	snap91a/cltcl1/AP2A2
MOLNG-2800	pachon_lab_vs_surface_lab	UP	Molecular Functions	GO:0005262	calcium channel activity	3/321	23/11006	0.0282619274891232	0.2882716603890567	0.2548531706913918	3	0.67	3/0.67	ENSAMXG00000012714/ENSAMXG00000013243/ENSAMXG00000008578	cacna1bb/cacnb2b/ryr1a
MOLNG-2800	pachon_lab_vs_surface_lab	UP	Molecular Functions	GO:0022843	voltage-gated cation channel activity	3/321	23/11006	0.0282619274891232	0.2882716603890567	0.2548531706913918	3	0.67	3/0.67	ENSAMXG00000012714/ENSAMXG00000013243/ENSAMXG00000039836	cacna1bb/cacnb2b/kcnh1b
MOLNG-2800	pachon_lab_vs_surface_lab	UP	Molecular Functions	GO:0016788	hydrolase activity, acting on ester bonds	22/321	490/11006	0.0295006644933458	0.2905676949973439	0.25688303272899	22	14.29	22/14.29	ENSAMXG00000001736/ENSAMXG00000044082/ENSAMXG00000038483/ENSAMXG00000040932/ENSAMXG00000006275/ENSAMXG00000018847/ENSAMXG00000035124/ENSAMXG00000000789/ENSAMXG00000004263/ENSAMXG00000032571/ENSAMXG00000003998/ENSAMXG00000001046/ENSAMXG00000033189/ENSAMXG00000017456/ENSAMXG00000009144/ENSAMXG00000030747/ENSAMXG00000032795/ENSAMXG00000017465/ENSAMXG00000020349/ENSAMXG00000003130/ENSAMXG00000032621/…	zc3h12a/plcd3b///plcd3b/sts/inpp5jb/ptpro/zgc:77752//proca1/pfkfb2a/dusp22b/PLAAT4/pfkfb4a//plcd4a/helz2/ppm1na/acot8/pde6gb/PTPN14
MOLNG-2800	pachon_lab_vs_surface_lab	UP	Molecular Functions	GO:0016757	transferase activity, transferring glycosyl groups	12/321	223/11006	0.0303861641827287	0.2905676949973439	0.25688303272899	12	6.5	12/6.5	ENSAMXG00000000341/ENSAMXG00000029919/ENSAMXG00000015192/ENSAMXG00000025187/ENSAMXG00000043556/ENSAMXG00000032972/ENSAMXG00000009657/ENSAMXG00000029221/ENSAMXG00000014461/ENSAMXG00000040472/ENSAMXG00000043259/ENSAMXG00000010369	st6gal2a/b3gnt3.4/parp3/gig2p///tymp/b4galnt1a/ogt.1/gba/st3gal5/ext1c
MOLNG-2800	pachon_lab_vs_surface_lab	UP	Molecular Functions	GO:0016229	steroid dehydrogenase activity	2/321	10/11006	0.0326906195012307	0.297780435639323	0.263259621463041	2	0.29	2/0.29	ENSAMXG00000030610/ENSAMXG00000037805	hsd20b2/hsd17b3
MOLNG-2800	pachon_lab_vs_surface_lab	UP	Molecular Functions	GO:0005509	calcium ion binding	18/321	385/11006	0.0330867150710358	0.297780435639323	0.263259621463041	18	11.23	18/11.23	ENSAMXG00000014532/ENSAMXG00000044082/ENSAMXG00000006275/ENSAMXG00000012714/ENSAMXG00000021348/ENSAMXG00000031306/ENSAMXG00000043828/ENSAMXG00000029311/ENSAMXG00000005018/ENSAMXG00000042100/ENSAMXG00000008578/ENSAMXG00000029656/ENSAMXG00000032795/ENSAMXG00000020719/ENSAMXG00000018839/ENSAMXG00000011146/ENSAMXG00000018273/ENSAMXG00000020944	slc25a13/plcd3b/plcd3b/cacna1bb/nid1b/pvalb9//pvalb5/svep1//ryr1a/epdl2/plcd4a/pvalb8/LRP8/pcdh11/scube1/vldlr
MOLNG-2800	pachon_lab_vs_surface_lab	UP	Molecular Functions	GO:0005244	voltage-gated ion channel activity	4/321	44/11006	0.0386391078451093	0.3004562598158981	0.2656252451760778	4	1.28	4/1.28	ENSAMXG00000012714/ENSAMXG00000013243/ENSAMXG00000039836/ENSAMXG00000021379	cacna1bb/cacnb2b/kcnh1b/scn5lab
MOLNG-2800	pachon_lab_vs_surface_lab	UP	Molecular Functions	GO:0016712	oxidoreductase activity, acting on paired donors, with incorporation or reduction of molecular oxygen, reduced flavin or flavoprotein as one donor, and incorporation of one atom of oxygen	3/321	26/11006	0.0389316743593266	0.3004562598158981	0.2656252451760778	3	0.76	3/0.76	ENSAMXG00000043827/ENSAMXG00000035565/ENSAMXG00000020784	/cyp3a65/cyp1a
MOLNG-2800	pachon_lab_vs_surface_lab	UP	Molecular Functions	GO:0004623	phospholipase A2 activity	2/321	11/11006	0.0391980347102621	0.3004562598158981	0.2656252451760778	2	0.32	2/0.32	ENSAMXG00000003998/ENSAMXG00000017456	proca1/PLAAT4
MOLNG-2800	pachon_lab_vs_surface_lab	UP	Molecular Functions	GO:0003774	motor activity	6/321	86/11006	0.0394635652360398	0.3004562598158981	0.2656252451760778	6	2.51	6/2.51	ENSAMXG00000033131/ENSAMXG00000005950/ENSAMXG00000017247/ENSAMXG00000011281/ENSAMXG00000004937/ENSAMXG00000003249	/kif1ab/myo5ab/kif11/dnah9l/kif17
MOLNG-2800	pachon_lab_vs_surface_lab	UP	Molecular Functions	GO:0016298	lipase activity	5/321	65/11006	0.0407370492201059	0.3004562598158981	0.2656252451760778	5	1.9	5/1.9	ENSAMXG00000044082/ENSAMXG00000006275/ENSAMXG00000003998/ENSAMXG00000017456/ENSAMXG00000032795	plcd3b/plcd3b/proca1/PLAAT4/plcd4a
MOLNG-2800	pachon_lab_vs_surface_lab	UP	Molecular Functions	GO:0005506	iron ion binding	8/321	133/11006	0.0407717753082614	0.3004562598158981	0.2656252451760778	8	3.88	8/3.88	ENSAMXG00000043827/ENSAMXG00000037990/ENSAMXG00000003540/ENSAMXG00000006114/ENSAMXG00000035565/ENSAMXG00000020784/ENSAMXG00000033841/ENSAMXG00000033597	//p3h1/bcs1l/cyp3a65/cyp1a//
MOLNG-2800	pachon_lab_vs_surface_lab	UP	Molecular Functions	GO:0030546	signaling receptor activator activity	8/321	135/11006	0.0438906145258292	0.3004562598158981	0.2656252451760778	8	3.94	8/3.94	ENSAMXG00000043622/ENSAMXG00000040690/ENSAMXG00000004485/ENSAMXG00000029840/ENSAMXG00000037017/ENSAMXG00000033973/ENSAMXG00000013556/ENSAMXG00000033055	/calca/galn/mstna/mdka//pdgfaa/
MOLNG-2800	pachon_lab_vs_surface_lab	UP	Molecular Functions	GO:0048018	receptor ligand activity	8/321	135/11006	0.0438906145258292	0.3004562598158981	0.2656252451760778	8	3.94	8/3.94	ENSAMXG00000043622/ENSAMXG00000040690/ENSAMXG00000004485/ENSAMXG00000029840/ENSAMXG00000037017/ENSAMXG00000033973/ENSAMXG00000013556/ENSAMXG00000033055	/calca/galn/mstna/mdka//pdgfaa/
MOLNG-2800	pachon_lab_vs_surface_lab	UP	Molecular Functions	GO:0005102	signaling receptor binding	13/321	263/11006	0.0446121702966179	0.3004562598158981	0.2656252451760778	13	7.67	13/7.67	ENSAMXG00000005024/ENSAMXG00000043622/ENSAMXG00000041835/ENSAMXG00000011006/ENSAMXG00000040690/ENSAMXG00000004485/ENSAMXG00000029840/ENSAMXG00000037017/ENSAMXG00000033973/ENSAMXG00000012321/ENSAMXG00000013556/ENSAMXG00000033055/ENSAMXG00000030262	nisch//nrg3b/tgfbi/calca/galn/mstna/mdka//NPFFR2/pdgfaa//SEMA4D
MOLNG-2800	pachon_lab_vs_surface_lab	UP	Molecular Functions	GO:0030545	receptor regulator activity	8/321	136/11006	0.0455074794378027	0.3004562598158981	0.2656252451760778	8	3.97	8/3.97	ENSAMXG00000043622/ENSAMXG00000040690/ENSAMXG00000004485/ENSAMXG00000029840/ENSAMXG00000037017/ENSAMXG00000033973/ENSAMXG00000013556/ENSAMXG00000033055	/calca/galn/mstna/mdka//pdgfaa/
MOLNG-2800	pachon_lab_vs_surface_lab	UP	Molecular Functions	GO:0019203	carbohydrate phosphatase activity	2/321	12/11006	0.0461485104945987	0.3004562598158981	0.2656252451760778	2	0.35	2/0.35	ENSAMXG00000001046/ENSAMXG00000009144	pfkfb2a/pfkfb4a
MOLNG-2800	pachon_lab_vs_surface_lab	UP	Molecular Functions	GO:0050308	sugar-phosphatase activity	2/321	12/11006	0.0461485104945987	0.3004562598158981	0.2656252451760778	2	0.35	2/0.35	ENSAMXG00000001046/ENSAMXG00000009144	pfkfb2a/pfkfb4a
MOLNG-2800	pachon_lab_vs_surface_lab	UP	Molecular Functions	GO:0140326	ATPase-coupled intramembrane lipid transporter activity	2/321	12/11006	0.0461485104945987	0.3004562598158981	0.2656252451760778	2	0.35	2/0.35	ENSAMXG00000000590/ENSAMXG00000001413	atp8b4/ATP11B
MOLNG-2800	pachon_lab_vs_surface_lab	UP	Molecular Functions	GO:0022832	voltage-gated channel activity	4/321	47/11006	0.0474780269015266	0.3026724214972326	0.2675844937213236	4	1.37	4/1.37	ENSAMXG00000012714/ENSAMXG00000013243/ENSAMXG00000039836/ENSAMXG00000021379	cacna1bb/cacnb2b/kcnh1b/scn5lab
MOLNG-2800	pachon_lab_vs_surface_lab	UP	Molecular Functions	GO:0004497	monooxygenase activity	6/321	91/11006	0.0497012169948446	0.3103790285800499	0.2743976964054793	6	2.65	6/2.65	ENSAMXG00000043827/ENSAMXG00000001280/ENSAMXG00000006114/ENSAMXG00000035565/ENSAMXG00000020784/ENSAMXG00000033841	/mical1/bcs1l/cyp3a65/cyp1a/
MOLNG-2800	pachon_lab_vs_surface_lab	Down	Cellular Components	GO:0030496	midbody	2/143	17/8458	0.0326994380931671	0.8080753572364374	0.8080753572364374	2	0.29	2/0.29	ENSAMXG00000042072/ENSAMXG00000010675	ccdc124/rab11fip4a
MOLNG-2800	pachon_lab_vs_surface_lab	Down	Cellular Components	GO:0005615	extracellular space	6/143	155/8458	0.0474204720697081	0.8080753572364374	0.8080753572364374	6	2.62	6/2.62	ENSAMXG00000038575/ENSAMXG00000032975/ENSAMXG00000017350/ENSAMXG00000012304/ENSAMXG00000032754/ENSAMXG00000041972	cfd//ggh/lipca//ggh
MOLNG-2800	pachon_lab_vs_surface_lab	Down	Biological Process	GO:0032102	negative regulation of response to external stimulus	3/148	19/9643	0.0028663474826085	0.8356156394602242	0.8356156394602243	3	0.29	3/0.29	ENSAMXG00000039589/ENSAMXG00000011351/ENSAMXG00000009492	f7i/irak3/pros1
MOLNG-2800	pachon_lab_vs_surface_lab	Down	Biological Process	GO:0009605	response to external stimulus	13/148	397/9643	0.0079683540560666	0.8356156394602242	0.8356156394602243	13	6.09	13/6.09	ENSAMXG00000004525/ENSAMXG00000029859/ENSAMXG00000039589/ENSAMXG00000040073/ENSAMXG00000038575/ENSAMXG00000032975/ENSAMXG00000012305/ENSAMXG00000011351/ENSAMXG00000032754/ENSAMXG00000009464/ENSAMXG00000007167/ENSAMXG00000004298/ENSAMXG00000009492	alpl//f7i//cfd//nrp1b/irak3//nexn//mcm4/pros1
MOLNG-2800	pachon_lab_vs_surface_lab	Down	Biological Process	GO:0050818	regulation of coagulation	2/148	10/9643	0.0097119615646551	0.8356156394602242	0.8356156394602243	2	0.15	2/0.15	ENSAMXG00000039589/ENSAMXG00000009492	f7i/pros1
MOLNG-2800	pachon_lab_vs_surface_lab	Down	Biological Process	GO:0018298	protein-chromophore linkage	2/148	11/9643	0.0117514947756658	0.8356156394602242	0.8356156394602243	2	0.17	2/0.17	ENSAMXG00000029859/ENSAMXG00000003688	/si:ch1073-390k14.1
MOLNG-2800	pachon_lab_vs_surface_lab	Down	Biological Process	GO:0061041	regulation of wound healing	2/148	11/9643	0.0117514947756658	0.8356156394602242	0.8356156394602243	2	0.17	2/0.17	ENSAMXG00000039589/ENSAMXG00000009492	f7i/pros1
MOLNG-2800	pachon_lab_vs_surface_lab	Down	Biological Process	GO:0016042	lipid catabolic process	5/148	92/9643	0.0134536774352201	0.8356156394602242	0.8356156394602243	5	1.41	5/1.41	ENSAMXG00000042587/ENSAMXG00000017880/ENSAMXG00000002021/ENSAMXG00000012304/ENSAMXG00000002005	enpp6/plcd3a//lipca/PNLIPRP2
MOLNG-2800	pachon_lab_vs_surface_lab	Down	Biological Process	GO:0009112	nucleobase metabolic process	2/148	15/9643	0.0215535033252238	0.8356156394602242	0.8356156394602243	2	0.23	2/0.23	ENSAMXG00000040373/ENSAMXG00000036900	urahb/dhodh
MOLNG-2800	pachon_lab_vs_surface_lab	Down	Biological Process	GO:1903510	mucopolysaccharide metabolic process	2/148	16/9643	0.024387819732555	0.8356156394602242	0.8356156394602243	2	0.25	2/0.25	ENSAMXG00000031428/ENSAMXG00000007241	/
MOLNG-2800	pachon_lab_vs_surface_lab	Down	Biological Process	GO:0007155	cell adhesion	8/148	234/9643	0.0276112127657882	0.8356156394602242	0.8356156394602243	8	3.59	8/3.59	ENSAMXG00000039099/ENSAMXG00000021055/ENSAMXG00000032608/ENSAMXG00000009464/ENSAMXG00000006089/ENSAMXG00000008293/ENSAMXG00000037102/ENSAMXG00000042323	/nedd4a//nexn/pkp3b/itga10//
MOLNG-2800	pachon_lab_vs_surface_lab	Down	Biological Process	GO:0022610	biological adhesion	8/148	234/9643	0.0276112127657882	0.8356156394602242	0.8356156394602243	8	3.59	8/3.59	ENSAMXG00000039099/ENSAMXG00000021055/ENSAMXG00000032608/ENSAMXG00000009464/ENSAMXG00000006089/ENSAMXG00000008293/ENSAMXG00000037102/ENSAMXG00000042323	/nedd4a//nexn/pkp3b/itga10//
MOLNG-2800	pachon_lab_vs_surface_lab	Down	Biological Process	GO:1903034	regulation of response to wounding	2/148	19/9643	0.0337295239495582	0.8356156394602242	0.8356156394602243	2	0.29	2/0.29	ENSAMXG00000039589/ENSAMXG00000009492	f7i/pros1
MOLNG-2800	pachon_lab_vs_surface_lab	Down	Biological Process	GO:0048585	negative regulation of response to stimulus	6/148	163/9643	0.0394445391962932	0.8356156394602242	0.8356156394602243	6	2.5	6/2.5	ENSAMXG00000006320/ENSAMXG00000039589/ENSAMXG00000011351/ENSAMXG00000021055/ENSAMXG00000041177/ENSAMXG00000009492	rgs11/f7i/irak3/nedd4a/cishb/pros1
MOLNG-2800	pachon_lab_vs_surface_lab	Down	Biological Process	GO:0030162	regulation of proteolysis	4/148	86/9643	0.0430151627977538	0.8356156394602242	0.8356156394602243	4	1.32	4/1.32	ENSAMXG00000031428/ENSAMXG00000015362/ENSAMXG00000007241/ENSAMXG00000031481	///psmc2
MOLNG-2800	pachon_lab_vs_surface_lab	Down	Biological Process	GO:0007596	blood coagulation	3/148	53/9643	0.0475446715306014	0.8356156394602242	0.8356156394602243	3	0.81	3/0.81	ENSAMXG00000039589/ENSAMXG00000015362/ENSAMXG00000009492	f7i//pros1
MOLNG-2800	pachon_lab_vs_surface_lab	Down	Biological Process	GO:0007599	hemostasis	3/148	54/9643	0.0497943173956974	0.8356156394602242	0.8356156394602243	3	0.83	3/0.83	ENSAMXG00000039589/ENSAMXG00000015362/ENSAMXG00000009492	f7i//pros1
MOLNG-2800	pachon_lab_vs_surface_lab	Down	Molecular Functions	GO:0015291	secondary active transmembrane transporter activity	7/199	89/11006	0.0011202904959236	0.0790013277925591	0.0762596131300272	7	1.61	7/1.61	ENSAMXG00000039813/ENSAMXG00000032301/ENSAMXG00000007976/ENSAMXG00000000553/ENSAMXG00000030625/ENSAMXG00000002330/ENSAMXG00000031619	slc6a15/slc6a15/slc4a7/slc6a16a/slc6a15/slc6a22.1/slc8b1
MOLNG-2800	pachon_lab_vs_surface_lab	Down	Molecular Functions	GO:0015293	symporter activity	5/199	51/11006	0.0021985474706941	0.0790013277925591	0.0762596131300272	5	0.92	5/0.92	ENSAMXG00000039813/ENSAMXG00000032301/ENSAMXG00000000553/ENSAMXG00000030625/ENSAMXG00000002330	slc6a15/slc6a15/slc6a16a/slc6a15/slc6a22.1
MOLNG-2800	pachon_lab_vs_surface_lab	Down	Molecular Functions	GO:0001883	purine nucleoside binding	16/199	403/11006	0.0026464836570658	0.0790013277925591	0.0762596131300272	16	7.29	16/7.29	ENSAMXG00000037759/ENSAMXG00000042552/ENSAMXG00000035326/ENSAMXG00000033387/ENSAMXG00000038732/ENSAMXG00000034919/ENSAMXG00000036169/ENSAMXG00000026465/ENSAMXG00000026503/ENSAMXG00000024926/ENSAMXG00000042848/ENSAMXG00000030683/ENSAMXG00000032381/ENSAMXG00000039378/ENSAMXG00000036435/ENSAMXG00000018092	/////////arl4cb//arl8ba////mocs1
MOLNG-2800	pachon_lab_vs_surface_lab	Down	Molecular Functions	GO:0005525	GTP binding	16/199	403/11006	0.0026464836570658	0.0790013277925591	0.0762596131300272	16	7.29	16/7.29	ENSAMXG00000037759/ENSAMXG00000042552/ENSAMXG00000035326/ENSAMXG00000033387/ENSAMXG00000038732/ENSAMXG00000034919/ENSAMXG00000036169/ENSAMXG00000026465/ENSAMXG00000026503/ENSAMXG00000024926/ENSAMXG00000042848/ENSAMXG00000030683/ENSAMXG00000032381/ENSAMXG00000039378/ENSAMXG00000036435/ENSAMXG00000018092	/////////arl4cb//arl8ba////mocs1
MOLNG-2800	pachon_lab_vs_surface_lab	Down	Molecular Functions	GO:0032550	purine ribonucleoside binding	16/199	403/11006	0.0026464836570658	0.0790013277925591	0.0762596131300272	16	7.29	16/7.29	ENSAMXG00000037759/ENSAMXG00000042552/ENSAMXG00000035326/ENSAMXG00000033387/ENSAMXG00000038732/ENSAMXG00000034919/ENSAMXG00000036169/ENSAMXG00000026465/ENSAMXG00000026503/ENSAMXG00000024926/ENSAMXG00000042848/ENSAMXG00000030683/ENSAMXG00000032381/ENSAMXG00000039378/ENSAMXG00000036435/ENSAMXG00000018092	/////////arl4cb//arl8ba////mocs1
MOLNG-2800	pachon_lab_vs_surface_lab	Down	Molecular Functions	GO:0001882	nucleoside binding	16/199	406/11006	0.0028483017790044	0.0790013277925591	0.0762596131300272	16	7.34	16/7.34	ENSAMXG00000037759/ENSAMXG00000042552/ENSAMXG00000035326/ENSAMXG00000033387/ENSAMXG00000038732/ENSAMXG00000034919/ENSAMXG00000036169/ENSAMXG00000026465/ENSAMXG00000026503/ENSAMXG00000024926/ENSAMXG00000042848/ENSAMXG00000030683/ENSAMXG00000032381/ENSAMXG00000039378/ENSAMXG00000036435/ENSAMXG00000018092	/////////arl4cb//arl8ba////mocs1
MOLNG-2800	pachon_lab_vs_surface_lab	Down	Molecular Functions	GO:0032549	ribonucleoside binding	16/199	406/11006	0.0028483017790044	0.0790013277925591	0.0762596131300272	16	7.34	16/7.34	ENSAMXG00000037759/ENSAMXG00000042552/ENSAMXG00000035326/ENSAMXG00000033387/ENSAMXG00000038732/ENSAMXG00000034919/ENSAMXG00000036169/ENSAMXG00000026465/ENSAMXG00000026503/ENSAMXG00000024926/ENSAMXG00000042848/ENSAMXG00000030683/ENSAMXG00000032381/ENSAMXG00000039378/ENSAMXG00000036435/ENSAMXG00000018092	/////////arl4cb//arl8ba////mocs1
MOLNG-2800	pachon_lab_vs_surface_lab	Down	Molecular Functions	GO:0032561	guanyl ribonucleotide binding	16/199	407/11006	0.0029183515694072	0.0790013277925591	0.0762596131300272	16	7.36	16/7.36	ENSAMXG00000037759/ENSAMXG00000042552/ENSAMXG00000035326/ENSAMXG00000033387/ENSAMXG00000038732/ENSAMXG00000034919/ENSAMXG00000036169/ENSAMXG00000026465/ENSAMXG00000026503/ENSAMXG00000024926/ENSAMXG00000042848/ENSAMXG00000030683/ENSAMXG00000032381/ENSAMXG00000039378/ENSAMXG00000036435/ENSAMXG00000018092	/////////arl4cb//arl8ba////mocs1
MOLNG-2800	pachon_lab_vs_surface_lab	Down	Molecular Functions	GO:0020037	heme binding	7/199	107/11006	0.0032302276939079	0.0790013277925591	0.0762596131300272	7	1.93	7/1.93	ENSAMXG00000006960/ENSAMXG00000032562/ENSAMXG00000031551/ENSAMXG00000037683/ENSAMXG00000041113/ENSAMXG00000006024/ENSAMXG00000006994	//cyp1a//cyb5b/cyp4v7/
MOLNG-2800	pachon_lab_vs_surface_lab	Down	Molecular Functions	GO:0019001	guanyl nucleotide binding	16/199	414/11006	0.0034498396415964	0.0790013277925591	0.0762596131300272	16	7.49	16/7.49	ENSAMXG00000037759/ENSAMXG00000042552/ENSAMXG00000035326/ENSAMXG00000033387/ENSAMXG00000038732/ENSAMXG00000034919/ENSAMXG00000036169/ENSAMXG00000026465/ENSAMXG00000026503/ENSAMXG00000024926/ENSAMXG00000042848/ENSAMXG00000030683/ENSAMXG00000032381/ENSAMXG00000039378/ENSAMXG00000036435/ENSAMXG00000018092	/////////arl4cb//arl8ba////mocs1
MOLNG-2800	pachon_lab_vs_surface_lab	Down	Molecular Functions	GO:0046906	tetrapyrrole binding	7/199	111/11006	0.003961278511041	0.0824666162753095	0.0796046399347966	7	2.01	7/2.01	ENSAMXG00000006960/ENSAMXG00000032562/ENSAMXG00000031551/ENSAMXG00000037683/ENSAMXG00000041113/ENSAMXG00000006024/ENSAMXG00000006994	//cyp1a//cyb5b/cyp4v7/
MOLNG-2800	pachon_lab_vs_surface_lab	Down	Molecular Functions	GO:0005506	iron ion binding	7/199	133/11006	0.0104278687890414	0.1963347691329949	0.1895210366257362	7	2.4	7/2.4	ENSAMXG00000006960/ENSAMXG00000032562/ENSAMXG00000003957/ENSAMXG00000031551/ENSAMXG00000037683/ENSAMXG00000006024/ENSAMXG00000006994	//miox/cyp1a//cyp4v7/
MOLNG-2800	pachon_lab_vs_surface_lab	Down	Molecular Functions	GO:0016712	oxidoreductase activity, acting on paired donors, with incorporation or reduction of molecular oxygen, reduced flavin or flavoprotein as one donor, and incorporation of one atom of oxygen	3/199	26/11006	0.0111456419158468	0.1963347691329949	0.1895210366257362	3	0.47	3/0.47	ENSAMXG00000031551/ENSAMXG00000037683/ENSAMXG00000006994	cyp1a//
MOLNG-2800	pachon_lab_vs_surface_lab	Down	Molecular Functions	GO:0008242	omega peptidase activity	2/199	11/11006	0.0160695959574553	0.262852676732663	0.2537304624861375	2	0.2	2/0.2	ENSAMXG00000017350/ENSAMXG00000041972	ggh/ggh
MOLNG-2800	pachon_lab_vs_surface_lab	Down	Molecular Functions	GO:0004497	monooxygenase activity	5/199	91/11006	0.0244525002842204	0.3672700018986247	0.3545240192999825	5	1.65	5/1.65	ENSAMXG00000032562/ENSAMXG00000031551/ENSAMXG00000037683/ENSAMXG00000006024/ENSAMXG00000006994	/cyp1a//cyp4v7/
MOLNG-2800	pachon_lab_vs_surface_lab	Down	Molecular Functions	GO:0004806	triglyceride lipase activity	2/199	14/11006	0.0256607861588558	0.3672700018986247	0.3545240192999825	2	0.25	2/0.25	ENSAMXG00000012304/ENSAMXG00000002005	lipca/PNLIPRP2
MOLNG-2800	pachon_lab_vs_surface_lab	Down	Molecular Functions	GO:0022804	active transmembrane transporter activity	7/199	164/11006	0.0293726386403298	0.3930888052123771	0.3794467896786909	7	2.97	7/2.97	ENSAMXG00000039813/ENSAMXG00000032301/ENSAMXG00000007976/ENSAMXG00000000553/ENSAMXG00000030625/ENSAMXG00000002330/ENSAMXG00000031619	slc6a15/slc6a15/slc4a7/slc6a16a/slc6a15/slc6a22.1/slc8b1
MOLNG-2800	pachon_lab_vs_surface_lab	Down	Molecular Functions	GO:0004867	serine-type endopeptidase inhibitor activity	3/199	38/11006	0.0308978100166933	0.3930888052123771	0.3794467896786909	3	0.69	3/0.69	ENSAMXG00000031428/ENSAMXG00000015362/ENSAMXG00000007241	//
MOLNG-2800	pachon_lab_vs_surface_lab	Down	Molecular Functions	GO:0016705	oxidoreductase activity, acting on paired donors, with incorporation or reduction of molecular oxygen	6/199	133/11006	0.0336016573280966	0.4049883962175861	0.3909334093573572	6	2.4	6/2.4	ENSAMXG00000006960/ENSAMXG00000032562/ENSAMXG00000031551/ENSAMXG00000037683/ENSAMXG00000006024/ENSAMXG00000006994	//cyp1a//cyp4v7/
MOLNG-2800	pachon_wild_vs_surface_wild	UP	Cellular Components	GO:0005840	ribosome	83/639	156/8458	1.307943485788461e-52	2.7989990595873065e-50	2.7948687117374485e-50	83	11.79	83/11.79	ENSAMXG00000037393/ENSAMXG00000001717/ENSAMXG00000038704/ENSAMXG00000041019/ENSAMXG00000004832/ENSAMXG00000007371/ENSAMXG00000032680/ENSAMXG00000033866/ENSAMXG00000043706/ENSAMXG00000035416/ENSAMXG00000037850/ENSAMXG00000019225/ENSAMXG00000006495/ENSAMXG00000039330/ENSAMXG00000037411/ENSAMXG00000001082/ENSAMXG00000029412/ENSAMXG00000013268/ENSAMXG00000018919/ENSAMXG00000013642/ENSAMXG00000021566/…	/rps19//rps7/rpl5b/rps17/si:dkey-151g10.6/rps16/rpl8/rpl34/uba52/rps14/rpl13/rpl27/rpl31/rpl17/rplp2/rps4x/rpl18/rps3/rpl36/rplp0/rpl10/rps15/RPL19/rps24//zgc:171772/si:dkey-159f12.2/rpl15/rpl21/rpsa/rps18/rps13/rps2/rpl7a/rpl6/rpl29/rps25//rpl32/RPL27A/rplp1/rpl13a/rpl12/rps8a/rps3a/rpl35/rpl38/rps27a/rpl14/rps21/rps10/rpl37/rpl18a/rpl23a/rpl7/faua/rpl39/rpl10a/rpl28//rps28/rps6/rpl22/rpl36a/rpl…
MOLNG-2800	pachon_wild_vs_surface_wild	UP	Cellular Components	GO:0044391	ribosomal subunit	19/639	36/8458	9.515552037870468e-13	1.01816406805214e-10	1.0166616124672134e-10	19	2.72	19/2.72	ENSAMXG00000043706/ENSAMXG00000001082/ENSAMXG00000029412/ENSAMXG00000013642/ENSAMXG00000019062/ENSAMXG00000032184/ENSAMXG00000033451/ENSAMXG00000037370/ENSAMXG00000012525/ENSAMXG00000033532/ENSAMXG00000008499/ENSAMXG00000032692/ENSAMXG00000020569/ENSAMXG00000010402/ENSAMXG00000031758/ENSAMXG00000035093/ENSAMXG00000029764/ENSAMXG00000033872/ENSAMXG00000037627	rpl8/rpl17/rplp2/rps3/rps15/RPL19/rpsa/rps2/rpl7a/rpl13a/rpl7/rpl10a//rps9/rpl26/rps23/rps5/rplp2l/rpl30
MOLNG-2800	pachon_wild_vs_surface_wild	UP	Cellular Components	GO:0005852	eukaryotic translation initiation factor 3 complex	10/639	16/8458	2.985662498784866e-08	2.013490768292777e-06	2.010519557124613e-06	10	1.21	10/1.21	ENSAMXG00000014287/ENSAMXG00000039638/ENSAMXG00000040781/ENSAMXG00000031139/ENSAMXG00000040417/ENSAMXG00000016937/ENSAMXG00000009773/ENSAMXG00000005260/ENSAMXG00000003073/ENSAMXG00000017547	eif3m/eif3k/eif3f/eif3g/eif3ea/eif3ha/eif3ba/eif3s10/eif3s6ip/eif3d
MOLNG-2800	pachon_wild_vs_surface_wild	UP	Cellular Components	GO:0015934	large ribosomal subunit	11/639	20/8458	3.76353414634164e-08	2.013490768292777e-06	2.010519557124613e-06	11	1.51	11/1.51	ENSAMXG00000043706/ENSAMXG00000001082/ENSAMXG00000029412/ENSAMXG00000032184/ENSAMXG00000012525/ENSAMXG00000033532/ENSAMXG00000008499/ENSAMXG00000032692/ENSAMXG00000031758/ENSAMXG00000033872/ENSAMXG00000037627	rpl8/rpl17/rplp2/RPL19/rpl7a/rpl13a/rpl7/rpl10a/rpl26/rplp2l/rpl30
MOLNG-2800	pachon_wild_vs_surface_wild	UP	Cellular Components	GO:0015935	small ribosomal subunit	8/639	16/8458	7.583039906276561e-06	0.0003245541079886368	0.00032407517915245096	8	1.21	8/1.21	ENSAMXG00000013642/ENSAMXG00000019062/ENSAMXG00000033451/ENSAMXG00000037370/ENSAMXG00000020569/ENSAMXG00000010402/ENSAMXG00000035093/ENSAMXG00000029764	rps3/rps15/rpsa/rps2//rps9/rps23/rps5
MOLNG-2800	pachon_wild_vs_surface_wild	UP	Cellular Components	GO:1990904	ribonucleoprotein complex	21/639	124/8458	0.00035931733015497026	0.0128156514421939	0.0127967400037647	21	9.37	21/9.37	ENSAMXG00000043706/ENSAMXG00000001082/ENSAMXG00000029412/ENSAMXG00000013642/ENSAMXG00000019062/ENSAMXG00000032184/ENSAMXG00000008146/ENSAMXG00000033451/ENSAMXG00000037370/ENSAMXG00000012525/ENSAMXG00000029387/ENSAMXG00000033532/ENSAMXG00000008499/ENSAMXG00000032692/ENSAMXG00000020569/ENSAMXG00000010402/ENSAMXG00000031758/ENSAMXG00000035093/ENSAMXG00000029764/ENSAMXG00000033872/ENSAMXG00000037627	rpl8/rpl17/rplp2/rps3/rps15/RPL19/rbm5/rpsa/rps2/rpl7a/larp6a/rpl13a/rpl7/rpl10a//rps9/rpl26/rps23/rps5/rplp2l/rpl30
MOLNG-2800	pachon_wild_vs_surface_wild	UP	Cellular Components	GO:0005615	extracellular space	22/639	155/8458	0.0029215412534632	0.0893156897487349	0.0891838908951952	22	11.71	22/11.71	ENSAMXG00000009469/ENSAMXG00000032164/ENSAMXG00000043622/ENSAMXG00000011343/ENSAMXG00000033309/ENSAMXG00000024348/ENSAMXG00000029777/ENSAMXG00000008063/ENSAMXG00000037904/ENSAMXG00000039279/ENSAMXG00000029241/ENSAMXG00000035037/ENSAMXG00000041699/ENSAMXG00000015397/ENSAMXG00000041972/ENSAMXG00000033055/ENSAMXG00000042620/ENSAMXG00000012314/ENSAMXG00000019072/ENSAMXG00000030125/ENSAMXG00000006926/…	///bmp15//serpinf1//fetub//creg1/serpini1//serpinb1l3/vwa2/ggh//tnfsf10/gc/ecm1b//serpina10a/lipca
MOLNG-2800	pachon_wild_vs_surface_wild	UP	Cellular Components	GO:0045121	membrane raft	5/639	25/8458	0.0363432347279105	0.7777452231772862	0.7765975420806155	5	1.89	5/1.89	ENSAMXG00000039880/ENSAMXG00000042053/ENSAMXG00000003825/ENSAMXG00000013549/ENSAMXG00000009583	vdac1/cavin2a/park7/dpp4/lipea
MOLNG-2800	pachon_wild_vs_surface_wild	UP	Cellular Components	GO:0098589	membrane region	5/639	25/8458	0.0363432347279105	0.7777452231772862	0.7765975420806155	5	1.89	5/1.89	ENSAMXG00000039880/ENSAMXG00000042053/ENSAMXG00000003825/ENSAMXG00000013549/ENSAMXG00000009583	vdac1/cavin2a/park7/dpp4/lipea
MOLNG-2800	pachon_wild_vs_surface_wild	UP	Cellular Components	GO:0098857	membrane microdomain	5/639	25/8458	0.0363432347279105	0.7777452231772862	0.7765975420806155	5	1.89	5/1.89	ENSAMXG00000039880/ENSAMXG00000042053/ENSAMXG00000003825/ENSAMXG00000013549/ENSAMXG00000009583	vdac1/cavin2a/park7/dpp4/lipea
MOLNG-2800	pachon_wild_vs_surface_wild	UP	Cellular Components	GO:0045202	synapse	12/639	94/8458	0.0498796360802729	0.9443431719917664	0.9429496503410162	12	7.1	12/7.1	ENSAMXG00000016321/ENSAMXG00000002098/ENSAMXG00000011074/ENSAMXG00000036598/ENSAMXG00000010342/ENSAMXG00000008210/ENSAMXG00000044072/ENSAMXG00000018861/ENSAMXG00000007933/ENSAMXG00000043478/ENSAMXG00000007004/ENSAMXG00000037597	bcr/ptprnb/syt2a/atp6v0cb/slc6a4a/homer1b/chrm2a/nlgn4xa/gabrr3b//olfm1b/nrxn2a
MOLNG-2800	pachon_wild_vs_surface_wild	UP	Molecular Functions	GO:0003735	structural constituent of ribosome	79/875	140/11006	1.4590339928940565e-50	5.996629710794572e-48	5.3446718897592795e-48	79	11.13	79/11.13	ENSAMXG00000037393/ENSAMXG00000001717/ENSAMXG00000038704/ENSAMXG00000041019/ENSAMXG00000004832/ENSAMXG00000007371/ENSAMXG00000032680/ENSAMXG00000033866/ENSAMXG00000043706/ENSAMXG00000035416/ENSAMXG00000037850/ENSAMXG00000019225/ENSAMXG00000006495/ENSAMXG00000039330/ENSAMXG00000037411/ENSAMXG00000001082/ENSAMXG00000029412/ENSAMXG00000013268/ENSAMXG00000018919/ENSAMXG00000013642/ENSAMXG00000021566/…	/rps19//rps7/rpl5b/rps17/si:dkey-151g10.6/rps16/rpl8/rpl34/uba52/rps14/rpl13/rpl27/rpl31/rpl17/rplp2/rps4x/rpl18/rps3/rpl36/rpl10/rps15/RPL19/rps24//zgc:171772/si:dkey-159f12.2/rpl15/rpl21/rpsa/rps18/rps13/rps2/rpl6/rpl29//rpl32/RPL27A/rplp1/rpl13a/rpl12/rps8a/rps3a/rpl35/rpl38/rps27a/rpl14/rps21/rpl37/rpl18a/rpl23a/rpl7/faua/rpl39/rpl10a/rpl28//rps28/rps6/rpl22/rpl36a/rpl11/rpl37/rpl4/rps12/rpl3…
MOLNG-2800	pachon_wild_vs_surface_wild	UP	Molecular Functions	GO:0005198	structural molecule activity	85/875	247/11006	2.3398073628611717e-33	4.8083041306797075e-31	4.285541906714145e-31	85	19.64	85/19.64	ENSAMXG00000036289/ENSAMXG00000037393/ENSAMXG00000001717/ENSAMXG00000038704/ENSAMXG00000041019/ENSAMXG00000004832/ENSAMXG00000021263/ENSAMXG00000041340/ENSAMXG00000007371/ENSAMXG00000032680/ENSAMXG00000033866/ENSAMXG00000043706/ENSAMXG00000035416/ENSAMXG00000037850/ENSAMXG00000019225/ENSAMXG00000006495/ENSAMXG00000039330/ENSAMXG00000037411/ENSAMXG00000001082/ENSAMXG00000016455/ENSAMXG00000029412/…	cltcl1//rps19//rps7/rpl5b/sptbn4b/krt96/rps17/si:dkey-151g10.6/rps16/rpl8/rpl34/uba52/rps14/rpl13/rpl27/rpl31/rpl17//rplp2/rps4x/rpl18/rps3/rpl36/rpl10/rps15/RPL19/cldn5a/rps24//zgc:171772/si:dkey-159f12.2/rpl15/rpl21/rpsa/rps18/rps13/rps2/rpl6/rpl29//rpl32/RPL27A/rplp1/rpl13a/rpl12/rps8a/rps3a/rpl35/rpl38/rps27a/rpl14/rps21/rpl37/rpl18a/rpl23a/rpl7/faua/rpl39/rpl10a/rpl28//rps28/rps6/rpl22/rpl36…
MOLNG-2800	pachon_wild_vs_surface_wild	UP	Molecular Functions	GO:0004364	glutathione transferase activity	8/875	14/11006	3.0121311045001947e-06	0.0004126619613165267	0.0003677970611810764	8	1.11	8/1.11	ENSAMXG00000035085/ENSAMXG00000029864/ENSAMXG00000014181/ENSAMXG00000041157/ENSAMXG00000041315/ENSAMXG00000036318/ENSAMXG00000039582/ENSAMXG00000033673	gstt1b/mgst1.2/gstt1b/gstr//gsta.1//gstt1b
MOLNG-2800	pachon_wild_vs_surface_wild	UP	Molecular Functions	GO:0008135	translation factor activity, RNA binding	17/875	63/11006	5.321979143160214e-06	0.0005468333569597119	0.00048738124784730377	17	5.01	17/5.01	ENSAMXG00000014287/ENSAMXG00000039638/ENSAMXG00000040781/ENSAMXG00000031139/ENSAMXG00000042563/ENSAMXG00000043611/ENSAMXG00000040417/ENSAMXG00000020662/ENSAMXG00000016937/ENSAMXG00000009773/ENSAMXG00000040220/ENSAMXG00000039778/ENSAMXG00000034687/ENSAMXG00000029743/ENSAMXG00000033877/ENSAMXG00000003073/ENSAMXG00000017547	eif3m/eif3k/eif3f/eif3g/eef1db/eef1da/eif3ea/eif2s3/eif3ha/eif3ba/eef1g/eif5a/eif2s1b//eif1b/eif3s6ip/eif3d
MOLNG-2800	pachon_wild_vs_surface_wild	UP	Molecular Functions	GO:0090079	translation regulator activity, nucleic acid binding	17/875	65/11006	8.432890180065714e-06	0.0006931835728014017	0.0006178201647711302	17	5.17	17/5.17	ENSAMXG00000014287/ENSAMXG00000039638/ENSAMXG00000040781/ENSAMXG00000031139/ENSAMXG00000042563/ENSAMXG00000043611/ENSAMXG00000040417/ENSAMXG00000020662/ENSAMXG00000016937/ENSAMXG00000009773/ENSAMXG00000040220/ENSAMXG00000039778/ENSAMXG00000034687/ENSAMXG00000029743/ENSAMXG00000033877/ENSAMXG00000003073/ENSAMXG00000017547	eif3m/eif3k/eif3f/eif3g/eef1db/eef1da/eif3ea/eif2s3/eif3ha/eif3ba/eef1g/eif5a/eif2s1b//eif1b/eif3s6ip/eif3d
MOLNG-2800	pachon_wild_vs_surface_wild	UP	Molecular Functions	GO:0019843	rRNA binding	8/875	16/11006	1.1173122398591087e-05	0.0007653588843034895	0.0006821485253876664	8	1.27	8/1.27	ENSAMXG00000004832/ENSAMXG00000013268/ENSAMXG00000042366/ENSAMXG00000041598/ENSAMXG00000014690/ENSAMXG00000041237/ENSAMXG00000010402/ENSAMXG00000006688	rpl5b/rps4x/si:dkey-159f12.2/rpl23a/rpl37/rpl9/rps9/rpl5a
MOLNG-2800	pachon_wild_vs_surface_wild	UP	Molecular Functions	GO:0045182	translation regulator activity	18/875	74/11006	1.380240831144871e-05	0.0008103985451436313	0.000722291442463782	18	5.88	18/5.88	ENSAMXG00000014287/ENSAMXG00000039638/ENSAMXG00000040781/ENSAMXG00000031139/ENSAMXG00000042563/ENSAMXG00000043611/ENSAMXG00000040417/ENSAMXG00000020662/ENSAMXG00000016937/ENSAMXG00000009773/ENSAMXG00000040220/ENSAMXG00000030047/ENSAMXG00000039778/ENSAMXG00000034687/ENSAMXG00000029743/ENSAMXG00000033877/ENSAMXG00000003073/ENSAMXG00000017547	eif3m/eif3k/eif3f/eif3g/eef1db/eef1da/eif3ea/eif2s3/eif3ha/eif3ba/eef1g/rpl10/eif5a/eif2s1b//eif1b/eif3s6ip/eif3d
MOLNG-2800	pachon_wild_vs_surface_wild	UP	Molecular Functions	GO:0030170	pyridoxal phosphate binding	11/875	36/11006	7.097312747002897e-05	0.0032411061544646	0.0028887308022888	11	2.86	11/2.86	ENSAMXG00000017574/ENSAMXG00000036798/ENSAMXG00000008119/ENSAMXG00000036404/ENSAMXG00000012538/ENSAMXG00000020893/ENSAMXG00000024715/ENSAMXG00000012558/ENSAMXG00000014048/ENSAMXG00000010173/ENSAMXG00000019455	accs/got2a/agxt2/shmt2/kyat3/gcat/alas1/kyat1/si:ch211-217a12.1/shmt1/ddc
MOLNG-2800	pachon_wild_vs_surface_wild	UP	Molecular Functions	GO:0070279	vitamin B6 binding	11/875	36/11006	7.097312747002897e-05	0.0032411061544646	0.0028887308022888	11	2.86	11/2.86	ENSAMXG00000017574/ENSAMXG00000036798/ENSAMXG00000008119/ENSAMXG00000036404/ENSAMXG00000012538/ENSAMXG00000020893/ENSAMXG00000024715/ENSAMXG00000012558/ENSAMXG00000014048/ENSAMXG00000010173/ENSAMXG00000019455	accs/got2a/agxt2/shmt2/kyat3/gcat/alas1/kyat1/si:ch211-217a12.1/shmt1/ddc
MOLNG-2800	pachon_wild_vs_surface_wild	UP	Molecular Functions	GO:0019842	vitamin binding	16/875	71/11006	0.00011045864690527711	0.0045398503878068	0.0040462746445301	16	5.64	16/5.64	ENSAMXG00000017574/ENSAMXG00000036798/ENSAMXG00000008119/ENSAMXG00000036404/ENSAMXG00000012538/ENSAMXG00000042237/ENSAMXG00000020893/ENSAMXG00000003540/ENSAMXG00000024715/ENSAMXG00000012558/ENSAMXG00000014048/ENSAMXG00000032567/ENSAMXG00000010173/ENSAMXG00000012314/ENSAMXG00000012140/ENSAMXG00000019455	accs/got2a/agxt2/shmt2/kyat3/tpk1/gcat/p3h1/alas1/kyat1/si:ch211-217a12.1/rbp4/shmt1/gc/zgc:153901/ddc
MOLNG-2800	pachon_wild_vs_surface_wild	UP	Molecular Functions	GO:0003743	translation initiation factor activity	12/875	45/11006	0.0001454749564705856	0.0054354733735827	0.0048445248661974	12	3.58	12/3.58	ENSAMXG00000014287/ENSAMXG00000039638/ENSAMXG00000040781/ENSAMXG00000031139/ENSAMXG00000040417/ENSAMXG00000020662/ENSAMXG00000016937/ENSAMXG00000009773/ENSAMXG00000034687/ENSAMXG00000033877/ENSAMXG00000003073/ENSAMXG00000017547	eif3m/eif3k/eif3f/eif3g/eif3ea/eif2s3/eif3ha/eif3ba/eif2s1b/eif1b/eif3s6ip/eif3d
MOLNG-2800	pachon_wild_vs_surface_wild	UP	Molecular Functions	GO:0015318	inorganic molecular entity transmembrane transporter activity	40/875	283/11006	0.0002457652399449449	0.0084174594681143	0.0075023073246351	40	22.5	40/22.5	ENSAMXG00000035630/ENSAMXG00000014880/ENSAMXG00000014532/ENSAMXG00000000107/ENSAMXG00000034391/ENSAMXG00000001543/ENSAMXG00000021060/ENSAMXG00000030429/ENSAMXG00000031866/ENSAMXG00000029555/ENSAMXG00000039880/ENSAMXG00000001272/ENSAMXG00000008578/ENSAMXG00000013051/ENSAMXG00000012506/ENSAMXG00000005734/ENSAMXG00000036598/ENSAMXG00000021168/ENSAMXG00000010342/ENSAMXG00000012433/ENSAMXG00000003723/…	cnga3a/kcnk10b/slc25a13/cngb3.2/cox8b/vdac2/BEST3/cox4i2/atp5mc3b/COX7A2L/vdac1/PIEZO2/ryr1a/vdac3/SLC12A2/slc23a1/atp6v0cb/hrc/slc6a4a//cox5b2/si:dkey-49c17.4/mcoln1b/COX7A2/slc16a7/slc39a13/clic5b/rbp4/scn5lab//atp2b1b/atp1a3a/gabrr3b/slc10a2///RYR2/slc39a8/ATP4A/atp1a1a.3
MOLNG-2800	pachon_wild_vs_surface_wild	UP	Molecular Functions	GO:0005506	iron ion binding	22/875	133/11006	0.0007588786085169749	0.023992239084652	0.0213837858918143	22	10.57	22/10.57	ENSAMXG00000043827/ENSAMXG00000018913/ENSAMXG00000009950/ENSAMXG00000019396/ENSAMXG00000033841/ENSAMXG00000020784/ENSAMXG00000003540/ENSAMXG00000036461/ENSAMXG00000031596/ENSAMXG00000033597/ENSAMXG00000010249/ENSAMXG00000037990/ENSAMXG00000038610/ENSAMXG00000005371/ENSAMXG00000006152/ENSAMXG00000009778/ENSAMXG00000042507/ENSAMXG00000044017/ENSAMXG00000043575/ENSAMXG00000015666/ENSAMXG00000003468/…	///cygb1//cyp1a/p3h1////cyp2u1//si:ch211-113j14.1//cyp7a1//zgc:56095//cyp26b1/PPEF2/si:dkey-91i10.3/ISCU
MOLNG-2800	pachon_wild_vs_surface_wild	UP	Molecular Functions	GO:0015075	ion transmembrane transporter activity	44/875	340/11006	0.0008550741238600382	0.0248278755687533	0.0221285713866721	44	27.03	44/27.03	ENSAMXG00000035630/ENSAMXG00000014880/ENSAMXG00000014532/ENSAMXG00000000107/ENSAMXG00000034391/ENSAMXG00000001543/ENSAMXG00000021060/ENSAMXG00000030429/ENSAMXG00000031866/ENSAMXG00000029555/ENSAMXG00000039880/ENSAMXG00000001272/ENSAMXG00000008578/ENSAMXG00000013051/ENSAMXG00000012506/ENSAMXG00000005734/ENSAMXG00000036598/ENSAMXG00000021168/ENSAMXG00000010342/ENSAMXG00000012433/ENSAMXG00000003723/…	cnga3a/kcnk10b/slc25a13/cngb3.2/cox8b/vdac2/BEST3/cox4i2/atp5mc3b/COX7A2L/vdac1/PIEZO2/ryr1a/vdac3/SLC12A2/slc23a1/atp6v0cb/hrc/slc6a4a//cox5b2/si:dkey-49c17.4//mcoln1b//COX7A2/slc16a7/slc39a13/clic5b/scn5lab//atp2b1b/sfxn2/atp1a3a/gabrr3b/slc10a2///RYR2/slc39a8/SLC41A3/ATP4A//atp1a1a.3
MOLNG-2800	pachon_wild_vs_surface_wild	UP	Molecular Functions	GO:0022890	inorganic cation transmembrane transporter activity	29/875	198/11006	0.0009550739086713044	0.0248278755687533	0.0221285713866721	29	15.74	29/15.74	ENSAMXG00000035630/ENSAMXG00000014880/ENSAMXG00000000107/ENSAMXG00000034391/ENSAMXG00000030429/ENSAMXG00000031866/ENSAMXG00000029555/ENSAMXG00000008578/ENSAMXG00000012506/ENSAMXG00000005734/ENSAMXG00000036598/ENSAMXG00000021168/ENSAMXG00000010342/ENSAMXG00000012433/ENSAMXG00000003723/ENSAMXG00000015134/ENSAMXG00000033504/ENSAMXG00000034037/ENSAMXG00000021379/ENSAMXG00000040194/ENSAMXG00000009418/…	cnga3a/kcnk10b/cngb3.2/cox8b/cox4i2/atp5mc3b/COX7A2L/ryr1a/SLC12A2/slc23a1/atp6v0cb/hrc/slc6a4a//cox5b2/mcoln1b/COX7A2/slc39a13/scn5lab//atp2b1b/atp1a3a/slc10a2///RYR2/slc39a8/ATP4A/atp1a1a.3
MOLNG-2800	pachon_wild_vs_surface_wild	UP	Molecular Functions	GO:0003746	translation elongation factor activity	5/875	11/11006	0.0009665353019466008	0.0248278755687533	0.0221285713866721	5	0.87	5/0.87	ENSAMXG00000042563/ENSAMXG00000043611/ENSAMXG00000040220/ENSAMXG00000039778/ENSAMXG00000029743	eef1db/eef1da/eef1g/eif5a/
MOLNG-2800	pachon_wild_vs_surface_wild	UP	Molecular Functions	GO:0008324	cation transmembrane transporter activity	30/875	213/11006	0.0014887787879111	0.0359934165783224	0.0320801868850204	30	16.93	30/16.93	ENSAMXG00000035630/ENSAMXG00000014880/ENSAMXG00000000107/ENSAMXG00000034391/ENSAMXG00000030429/ENSAMXG00000031866/ENSAMXG00000029555/ENSAMXG00000008578/ENSAMXG00000012506/ENSAMXG00000005734/ENSAMXG00000036598/ENSAMXG00000021168/ENSAMXG00000010342/ENSAMXG00000012433/ENSAMXG00000003723/ENSAMXG00000015134/ENSAMXG00000033504/ENSAMXG00000034037/ENSAMXG00000021379/ENSAMXG00000040194/ENSAMXG00000009418/…	cnga3a/kcnk10b/cngb3.2/cox8b/cox4i2/atp5mc3b/COX7A2L/ryr1a/SLC12A2/slc23a1/atp6v0cb/hrc/slc6a4a//cox5b2/mcoln1b/COX7A2/slc39a13/scn5lab//atp2b1b/atp1a3a/slc10a2///RYR2/slc39a8/SLC41A3/ATP4A/atp1a1a.3
MOLNG-2800	pachon_wild_vs_surface_wild	UP	Molecular Functions	GO:0020037	heme binding	18/875	107/11006	0.0018229461758263	0.0391048340528828	0.0348533288523581	18	8.51	18/8.51	ENSAMXG00000043827/ENSAMXG00000018913/ENSAMXG00000009950/ENSAMXG00000015199/ENSAMXG00000019396/ENSAMXG00000033841/ENSAMXG00000020784/ENSAMXG00000039501/ENSAMXG00000036461/ENSAMXG00000031596/ENSAMXG00000010249/ENSAMXG00000038610/ENSAMXG00000005371/ENSAMXG00000006152/ENSAMXG00000009778/ENSAMXG00000044017/ENSAMXG00000043575/ENSAMXG00000003468	///tdo2b/cygb1//cyp1a/ido1///cyp2u1/si:ch211-113j14.1//cyp7a1///cyp26b1/si:dkey-91i10.3
MOLNG-2800	pachon_wild_vs_surface_wild	UP	Molecular Functions	GO:0022836	gated channel activity	15/875	82/11006	0.0018264142706425	0.0391048340528828	0.0348533288523581	15	6.52	15/6.52	ENSAMXG00000035630/ENSAMXG00000000107/ENSAMXG00000001543/ENSAMXG00000039880/ENSAMXG00000001272/ENSAMXG00000008578/ENSAMXG00000013051/ENSAMXG00000036598/ENSAMXG00000021168/ENSAMXG00000033104/ENSAMXG00000021379/ENSAMXG00000007933/ENSAMXG00000043324/ENSAMXG00000043478/ENSAMXG00000042327	cnga3a/cngb3.2/vdac2/vdac1/PIEZO2/ryr1a/vdac3/atp6v0cb/hrc/si:dkey-49c17.4/scn5lab/gabrr3b///RYR2
MOLNG-2800	pachon_wild_vs_surface_wild	UP	Molecular Functions	GO:0005216	ion channel activity	19/875	116/11006	0.0019029116327436	0.0391048340528828	0.0348533288523581	19	9.22	19/9.22	ENSAMXG00000035630/ENSAMXG00000014880/ENSAMXG00000000107/ENSAMXG00000001543/ENSAMXG00000021060/ENSAMXG00000039880/ENSAMXG00000001272/ENSAMXG00000008578/ENSAMXG00000013051/ENSAMXG00000036598/ENSAMXG00000021168/ENSAMXG00000033104/ENSAMXG00000015134/ENSAMXG00000035157/ENSAMXG00000021379/ENSAMXG00000007933/ENSAMXG00000043324/ENSAMXG00000043478/ENSAMXG00000042327	cnga3a/kcnk10b/cngb3.2/vdac2/BEST3/vdac1/PIEZO2/ryr1a/vdac3/atp6v0cb/hrc/si:dkey-49c17.4/mcoln1b/clic5b/scn5lab/gabrr3b///RYR2
MOLNG-2800	pachon_wild_vs_surface_wild	UP	Molecular Functions	GO:0004497	monooxygenase activity	16/875	91/11006	0.0020066045843902	0.0392721182944953	0.0350024258329731	16	7.23	16/7.23	ENSAMXG00000043827/ENSAMXG00000018913/ENSAMXG00000033841/ENSAMXG00000020784/ENSAMXG00000036461/ENSAMXG00000031596/ENSAMXG00000010249/ENSAMXG00000011187/ENSAMXG00000038610/ENSAMXG00000005371/ENSAMXG00000006152/ENSAMXG00000009778/ENSAMXG00000044017/ENSAMXG00000043575/ENSAMXG00000011762/ENSAMXG00000003468	///cyp1a///cyp2u1//si:ch211-113j14.1//cyp7a1///cyp26b1/zgc:77439/si:dkey-91i10.3
MOLNG-2800	pachon_wild_vs_surface_wild	UP	Molecular Functions	GO:0015267	channel activity	21/875	136/11006	0.0023985219532297	0.0428605444685831	0.0382007157768394	21	10.81	21/10.81	ENSAMXG00000035630/ENSAMXG00000014880/ENSAMXG00000000107/ENSAMXG00000001543/ENSAMXG00000021060/ENSAMXG00000039880/ENSAMXG00000001272/ENSAMXG00000008578/ENSAMXG00000037390/ENSAMXG00000013051/ENSAMXG00000036598/ENSAMXG00000021168/ENSAMXG00000033104/ENSAMXG00000015134/ENSAMXG00000035157/ENSAMXG00000021379/ENSAMXG00000034583/ENSAMXG00000007933/ENSAMXG00000043324/ENSAMXG00000043478/ENSAMXG00000042327	cnga3a/kcnk10b/cngb3.2/vdac2/BEST3/vdac1/PIEZO2/ryr1a//vdac3/atp6v0cb/hrc/si:dkey-49c17.4/mcoln1b/clic5b/scn5lab/AQP11/gabrr3b///RYR2
MOLNG-2800	pachon_wild_vs_surface_wild	UP	Molecular Functions	GO:0022803	passive transmembrane transporter activity	21/875	136/11006	0.0023985219532297	0.0428605444685831	0.0382007157768394	21	10.81	21/10.81	ENSAMXG00000035630/ENSAMXG00000014880/ENSAMXG00000000107/ENSAMXG00000001543/ENSAMXG00000021060/ENSAMXG00000039880/ENSAMXG00000001272/ENSAMXG00000008578/ENSAMXG00000037390/ENSAMXG00000013051/ENSAMXG00000036598/ENSAMXG00000021168/ENSAMXG00000033104/ENSAMXG00000015134/ENSAMXG00000035157/ENSAMXG00000021379/ENSAMXG00000034583/ENSAMXG00000007933/ENSAMXG00000043324/ENSAMXG00000043478/ENSAMXG00000042327	cnga3a/kcnk10b/cngb3.2/vdac2/BEST3/vdac1/PIEZO2/ryr1a//vdac3/atp6v0cb/hrc/si:dkey-49c17.4/mcoln1b/clic5b/scn5lab/AQP11/gabrr3b///RYR2
MOLNG-2800	pachon_wild_vs_surface_wild	UP	Molecular Functions	GO:0046906	tetrapyrrole binding	18/875	111/11006	0.0027697380117154	0.0474317634506274	0.0422749485998677	18	8.82	18/8.82	ENSAMXG00000043827/ENSAMXG00000018913/ENSAMXG00000009950/ENSAMXG00000015199/ENSAMXG00000019396/ENSAMXG00000033841/ENSAMXG00000020784/ENSAMXG00000039501/ENSAMXG00000036461/ENSAMXG00000031596/ENSAMXG00000010249/ENSAMXG00000038610/ENSAMXG00000005371/ENSAMXG00000006152/ENSAMXG00000009778/ENSAMXG00000044017/ENSAMXG00000043575/ENSAMXG00000003468	///tdo2b/cygb1//cyp1a/ido1///cyp2u1/si:ch211-113j14.1//cyp7a1///cyp26b1/si:dkey-91i10.3
MOLNG-2800	pachon_wild_vs_surface_wild	UP	Molecular Functions	GO:0015077	monovalent inorganic cation transmembrane transporter activity	19/875	121/11006	0.0031184120165239	0.0512666935516532	0.0456929423894872	19	9.62	19/9.62	ENSAMXG00000014880/ENSAMXG00000034391/ENSAMXG00000030429/ENSAMXG00000031866/ENSAMXG00000029555/ENSAMXG00000005734/ENSAMXG00000036598/ENSAMXG00000010342/ENSAMXG00000012433/ENSAMXG00000003723/ENSAMXG00000033504/ENSAMXG00000021379/ENSAMXG00000040194/ENSAMXG00000014290/ENSAMXG00000014586/ENSAMXG00000043324/ENSAMXG00000043478/ENSAMXG00000016585/ENSAMXG00000012162	kcnk10b/cox8b/cox4i2/atp5mc3b/COX7A2L/slc23a1/atp6v0cb/slc6a4a//cox5b2/COX7A2/scn5lab//atp1a3a/slc10a2///ATP4A/atp1a1a.3
MOLNG-2800	pachon_wild_vs_surface_wild	UP	Molecular Functions	GO:0048037	cofactor binding	42/875	344/11006	0.0033691830538294	0.0532590090432274	0.0474686519324962	42	27.35	42/27.35	ENSAMXG00000017574/ENSAMXG00000043827/ENSAMXG00000018913/ENSAMXG00000009950/ENSAMXG00000015199/ENSAMXG00000019396/ENSAMXG00000033841/ENSAMXG00000029462/ENSAMXG00000016122/ENSAMXG00000036798/ENSAMXG00000020784/ENSAMXG00000039501/ENSAMXG00000008628/ENSAMXG00000000539/ENSAMXG00000001375/ENSAMXG00000008119/ENSAMXG00000036404/ENSAMXG00000012538/ENSAMXG00000020893/ENSAMXG00000003540/ENSAMXG00000036461/…	accs////tdo2b/cygb1//zgc:110843/acbd7/got2a/cyp1a/ido1/aifm4/aspdh//agxt2/shmt2/kyat3/gcat/p3h1//pora//cyp2u1/ivd/alas1/kyat1//si:ch211-113j14.1//si:ch211-217a12.1/cyp7a1//cdkal1/shmt1//idh1/cyp26b1/zgc:77439/si:dkey-91i10.3/ISCU/ddc
MOLNG-2800	pachon_wild_vs_surface_wild	UP	Molecular Functions	GO:0016705	oxidoreductase activity, acting on paired donors, with incorporation or reduction of molecular oxygen	20/875	133/11006	0.0041045042265603	0.0624796754487522	0.0556868409685383	20	10.57	20/10.57	ENSAMXG00000043827/ENSAMXG00000018913/ENSAMXG00000009950/ENSAMXG00000033841/ENSAMXG00000020784/ENSAMXG00000003540/ENSAMXG00000036461/ENSAMXG00000031596/ENSAMXG00000010249/ENSAMXG00000034191/ENSAMXG00000011187/ENSAMXG00000038610/ENSAMXG00000005371/ENSAMXG00000006152/ENSAMXG00000009778/ENSAMXG00000024395/ENSAMXG00000044017/ENSAMXG00000043575/ENSAMXG00000011762/ENSAMXG00000003468	////cyp1a/p3h1///cyp2u1/hmox2a//si:ch211-113j14.1//cyp7a1//tyw5//cyp26b1/zgc:77439/si:dkey-91i10.3
MOLNG-2800	pachon_wild_vs_surface_wild	UP	Molecular Functions	GO:0016684	oxidoreductase activity, acting on peroxide as acceptor	6/875	22/11006	0.0061208100106879	0.0898447469425981	0.0800767625458423	6	1.75	6/1.75	ENSAMXG00000015995/ENSAMXG00000041315/ENSAMXG00000041988/ENSAMXG00000039988/ENSAMXG00000005051/ENSAMXG00000037570	gpx4a//gpx4b/si:ch211-175m2.5/prdx6/prdx4
MOLNG-2800	pachon_wild_vs_surface_wild	UP	Molecular Functions	GO:0016209	antioxidant activity	8/875	37/11006	0.0074959290765393	0.1062354086364711	0.0946854199141809	8	2.94	8/2.94	ENSAMXG00000015995/ENSAMXG00000041315/ENSAMXG00000041988/ENSAMXG00000008618/ENSAMXG00000025411/ENSAMXG00000039988/ENSAMXG00000005051/ENSAMXG00000037570	gpx4a//gpx4b/sod1/sod3b/si:ch211-175m2.5/prdx6/prdx4
MOLNG-2800	pachon_wild_vs_surface_wild	UP	Molecular Functions	GO:0008242	omega peptidase activity	4/875	11/11006	0.0083197344718506	0.1139803622643539	0.1015883367089132	4	0.87	4/0.87	ENSAMXG00000032306/ENSAMXG00000020614/ENSAMXG00000041972/ENSAMXG00000030125	si:dkey-103j14.5//ggh/
MOLNG-2800	pachon_wild_vs_surface_wild	UP	Molecular Functions	GO:0052689	carboxylic ester hydrolase activity	11/875	63/11006	0.0101282440327115	0.1342809128207887	0.1196817970588666	11	5.01	11/5.01	ENSAMXG00000002796/ENSAMXG00000003998/ENSAMXG00000032114/ENSAMXG00000007738/ENSAMXG00000038629/ENSAMXG00000034266/ENSAMXG00000040135/ENSAMXG00000008227/ENSAMXG00000036265/ENSAMXG00000009583/ENSAMXG00000012304	LPL/proca1/rgn/lipf/pon1/ptrhd1/pla2g12b/aadacl4/iars1/lipea/lipca
MOLNG-2800	pachon_wild_vs_surface_wild	UP	Molecular Functions	GO:0008483	transaminase activity	5/875	18/11006	0.0112248303005651	0.1441689141728833	0.1284947679143639	5	1.43	5/1.43	ENSAMXG00000036798/ENSAMXG00000008119/ENSAMXG00000012538/ENSAMXG00000012558/ENSAMXG00000004368	got2a/agxt2/kyat3/kyat1/agxta
MOLNG-2800	pachon_wild_vs_surface_wild	UP	Molecular Functions	GO:0005217	intracellular ligand-gated ion channel activity	4/875	12/11006	0.0117050818295636	0.1442042115728428	0.1285262277560489	4	0.95	4/0.95	ENSAMXG00000035630/ENSAMXG00000000107/ENSAMXG00000008578/ENSAMXG00000042327	cnga3a/cngb3.2/ryr1a/RYR2
MOLNG-2800	pachon_wild_vs_surface_wild	UP	Molecular Functions	GO:0016298	lipase activity	11/875	65/11006	0.012743552754768	0.1442042115728428	0.1285262277560489	11	5.17	11/5.17	ENSAMXG00000044082/ENSAMXG00000002796/ENSAMXG00000006275/ENSAMXG00000003998/ENSAMXG00000007738/ENSAMXG00000040135/ENSAMXG00000014239/ENSAMXG00000006086/ENSAMXG00000009583/ENSAMXG00000032795/ENSAMXG00000012304	plcd3b/LPL/plcd3b/proca1/lipf/pla2g12b/plch2a/PLCB4/lipea/plcd4a/lipca
MOLNG-2800	pachon_wild_vs_surface_wild	UP	Molecular Functions	GO:0015276	ligand-gated ion channel activity	7/875	33/11006	0.0134458942968325	0.1442042115728428	0.1285262277560489	7	2.62	7/2.62	ENSAMXG00000035630/ENSAMXG00000000107/ENSAMXG00000008578/ENSAMXG00000033104/ENSAMXG00000007933/ENSAMXG00000043324/ENSAMXG00000042327	cnga3a/cngb3.2/ryr1a/si:dkey-49c17.4/gabrr3b//RYR2
MOLNG-2800	pachon_wild_vs_surface_wild	UP	Molecular Functions	GO:0022834	ligand-gated channel activity	7/875	33/11006	0.0134458942968325	0.1442042115728428	0.1285262277560489	7	2.62	7/2.62	ENSAMXG00000035630/ENSAMXG00000000107/ENSAMXG00000008578/ENSAMXG00000033104/ENSAMXG00000007933/ENSAMXG00000043324/ENSAMXG00000042327	cnga3a/cngb3.2/ryr1a/si:dkey-49c17.4/gabrr3b//RYR2
MOLNG-2800	pachon_wild_vs_surface_wild	UP	Molecular Functions	GO:0004435	phosphatidylinositol phospholipase C activity	5/875	19/11006	0.0142573962014803	0.1442042115728428	0.1285262277560489	5	1.51	5/1.51	ENSAMXG00000044082/ENSAMXG00000006275/ENSAMXG00000014239/ENSAMXG00000006086/ENSAMXG00000032795	plcd3b/plcd3b/plch2a/PLCB4/plcd4a
MOLNG-2800	pachon_wild_vs_surface_wild	UP	Molecular Functions	GO:0004629	phospholipase C activity	5/875	19/11006	0.0142573962014803	0.1442042115728428	0.1285262277560489	5	1.51	5/1.51	ENSAMXG00000044082/ENSAMXG00000006275/ENSAMXG00000014239/ENSAMXG00000006086/ENSAMXG00000032795	plcd3b/plcd3b/plch2a/PLCB4/plcd4a
MOLNG-2800	pachon_wild_vs_surface_wild	UP	Molecular Functions	GO:0016769	transferase activity, transferring nitrogenous groups	5/875	19/11006	0.0142573962014803	0.1442042115728428	0.1285262277560489	5	1.51	5/1.51	ENSAMXG00000036798/ENSAMXG00000008119/ENSAMXG00000012538/ENSAMXG00000012558/ENSAMXG00000004368	got2a/agxt2/kyat3/kyat1/agxta
MOLNG-2800	pachon_wild_vs_surface_wild	UP	Molecular Functions	GO:0099094	ligand-gated cation channel activity	5/875	19/11006	0.0142573962014803	0.1442042115728428	0.1285262277560489	5	1.51	5/1.51	ENSAMXG00000035630/ENSAMXG00000000107/ENSAMXG00000008578/ENSAMXG00000043324/ENSAMXG00000042327	cnga3a/cngb3.2/ryr1a//RYR2
MOLNG-2800	pachon_wild_vs_surface_wild	UP	Molecular Functions	GO:0016712	oxidoreductase activity, acting on paired donors, with incorporation or reduction of molecular oxygen, reduced flavin or flavoprotein as one donor, and incorporation of one atom of oxygen	6/875	26/11006	0.0143853349744198	0.1442042115728428	0.1285262277560489	6	2.07	6/2.07	ENSAMXG00000043827/ENSAMXG00000018913/ENSAMXG00000020784/ENSAMXG00000036461/ENSAMXG00000010249/ENSAMXG00000005371	//cyp1a//cyp2u1/
MOLNG-2800	pachon_wild_vs_surface_wild	UP	Molecular Functions	GO:0005319	lipid transporter activity	9/875	50/11006	0.0158170846548325	0.1547814712651475	0.137953520297788	9	3.98	9/3.98	ENSAMXG00000000590/ENSAMXG00000032567/ENSAMXG00000017475/ENSAMXG00000017461/ENSAMXG00000038452/ENSAMXG00000017117/ENSAMXG00000014586/ENSAMXG00000036364/ENSAMXG00000035001	atp8b4/rbp4////vtg3/slc10a2//si:ch73-269m23.5
MOLNG-2800	pachon_wild_vs_surface_wild	UP	Molecular Functions	GO:0046873	metal ion transmembrane transporter activity	16/875	113/11006	0.0166891793188042	0.1595175046518261	0.1421746487868754	16	8.98	16/8.98	ENSAMXG00000014880/ENSAMXG00000008578/ENSAMXG00000005734/ENSAMXG00000036598/ENSAMXG00000010342/ENSAMXG00000034037/ENSAMXG00000021379/ENSAMXG00000009418/ENSAMXG00000014290/ENSAMXG00000014586/ENSAMXG00000043324/ENSAMXG00000043478/ENSAMXG00000042327/ENSAMXG00000017115/ENSAMXG00000016585/ENSAMXG00000012162	kcnk10b/ryr1a/slc23a1/atp6v0cb/slc6a4a/slc39a13/scn5lab/atp2b1b/atp1a3a/slc10a2///RYR2/slc39a8/ATP4A/atp1a1a.3
MOLNG-2800	pachon_wild_vs_surface_wild	UP	Molecular Functions	GO:0016620	oxidoreductase activity, acting on the aldehyde or oxo group of donors, NAD or NADP as acceptor	5/875	20/11006	0.017794478906323	0.1662166097840632	0.1481454224736944	5	1.59	5/1.59	ENSAMXG00000035370/ENSAMXG00000016233/ENSAMXG00000009212/ENSAMXG00000042818/ENSAMXG00000012847	aldh2.2/aldh1l1/aldh3a1/aldh4a1/aldh7a1
MOLNG-2800	pachon_wild_vs_surface_wild	UP	Molecular Functions	GO:0016765	transferase activity, transferring alkyl or aryl (other than methyl) groups	8/875	43/11006	0.0184841661910017	0.168822051211149	0.1504675984671016	8	3.42	8/3.42	ENSAMXG00000035085/ENSAMXG00000029864/ENSAMXG00000014181/ENSAMXG00000041157/ENSAMXG00000041315/ENSAMXG00000036318/ENSAMXG00000039582/ENSAMXG00000033673	gstt1b/mgst1.2/gstt1b/gstr//gsta.1//gstt1b
MOLNG-2800	pachon_wild_vs_surface_wild	UP	Molecular Functions	GO:0008238	exopeptidase activity	11/875	69/11006	0.0194731755840917	0.1728231114841694	0.1540336606389831	11	5.49	11/5.49	ENSAMXG00000032306/ENSAMXG00000020614/ENSAMXG00000020653/ENSAMXG00000000206/ENSAMXG00000019847/ENSAMXG00000007879/ENSAMXG00000010769/ENSAMXG00000041972/ENSAMXG00000033119/ENSAMXG00000030125/ENSAMXG00000031678	si:dkey-103j14.5//anpepa/CPQ/cpdb/zgc:114181/cpxm1a/ggh/metap1//cpxm1b
MOLNG-2800	pachon_wild_vs_surface_wild	UP	Molecular Functions	GO:0005253	anion channel activity	6/875	28/11006	0.0205604241677286	0.1728231114841694	0.1540336606389831	6	2.23	6/2.23	ENSAMXG00000001543/ENSAMXG00000021060/ENSAMXG00000039880/ENSAMXG00000013051/ENSAMXG00000035157/ENSAMXG00000007933	vdac2/BEST3/vdac1/vdac3/clic5b/gabrr3b
MOLNG-2800	pachon_wild_vs_surface_wild	UP	Molecular Functions	GO:0004129	cytochrome-c oxidase activity	5/875	21/11006	0.0218656978033499	0.1728231114841694	0.1540336606389831	5	1.67	5/1.67	ENSAMXG00000034391/ENSAMXG00000030429/ENSAMXG00000029555/ENSAMXG00000003723/ENSAMXG00000033504	cox8b/cox4i2/COX7A2L/cox5b2/COX7A2
MOLNG-2800	pachon_wild_vs_surface_wild	UP	Molecular Functions	GO:0004601	peroxidase activity	5/875	21/11006	0.0218656978033499	0.1728231114841694	0.1540336606389831	5	1.67	5/1.67	ENSAMXG00000015995/ENSAMXG00000041315/ENSAMXG00000041988/ENSAMXG00000005051/ENSAMXG00000037570	gpx4a//gpx4b/prdx6/prdx4
MOLNG-2800	pachon_wild_vs_surface_wild	UP	Molecular Functions	GO:0015002	heme-copper terminal oxidase activity	5/875	21/11006	0.0218656978033499	0.1728231114841694	0.1540336606389831	5	1.67	5/1.67	ENSAMXG00000034391/ENSAMXG00000030429/ENSAMXG00000029555/ENSAMXG00000003723/ENSAMXG00000033504	cox8b/cox4i2/COX7A2L/cox5b2/COX7A2
MOLNG-2800	pachon_wild_vs_surface_wild	UP	Molecular Functions	GO:0016675	oxidoreductase activity, acting on a heme group of donors	5/875	21/11006	0.0218656978033499	0.1728231114841694	0.1540336606389831	5	1.67	5/1.67	ENSAMXG00000034391/ENSAMXG00000030429/ENSAMXG00000029555/ENSAMXG00000003723/ENSAMXG00000033504	cox8b/cox4i2/COX7A2L/cox5b2/COX7A2
MOLNG-2800	pachon_wild_vs_surface_wild	UP	Molecular Functions	GO:0016676	oxidoreductase activity, acting on a heme group of donors, oxygen as acceptor	5/875	21/11006	0.0218656978033499	0.1728231114841694	0.1540336606389831	5	1.67	5/1.67	ENSAMXG00000034391/ENSAMXG00000030429/ENSAMXG00000029555/ENSAMXG00000003723/ENSAMXG00000033504	cox8b/cox4i2/COX7A2L/cox5b2/COX7A2
MOLNG-2800	pachon_wild_vs_surface_wild	UP	Molecular Functions	GO:0015294	solute:cation symporter activity	4/875	15/11006	0.0266662577903873	0.2029598509601702	0.1808939124961948	4	1.19	4/1.19	ENSAMXG00000012506/ENSAMXG00000005734/ENSAMXG00000010342/ENSAMXG00000014586	SLC12A2/slc23a1/slc6a4a/slc10a2
MOLNG-2800	pachon_wild_vs_surface_wild	UP	Molecular Functions	GO:0015662	ion transmembrane transporter activity, phosphorylative mechanism	4/875	15/11006	0.0266662577903873	0.2029598509601702	0.1808939124961948	4	1.19	4/1.19	ENSAMXG00000009418/ENSAMXG00000014290/ENSAMXG00000016585/ENSAMXG00000012162	atp2b1b/atp1a3a/ATP4A/atp1a1a.3
MOLNG-2800	pachon_wild_vs_surface_wild	UP	Molecular Functions	GO:0005261	cation channel activity	11/875	73/11006	0.0285261569255355	0.2131681908435471	0.1899923944514135	11	5.8	11/5.8	ENSAMXG00000035630/ENSAMXG00000014880/ENSAMXG00000000107/ENSAMXG00000008578/ENSAMXG00000036598/ENSAMXG00000021168/ENSAMXG00000015134/ENSAMXG00000021379/ENSAMXG00000043324/ENSAMXG00000043478/ENSAMXG00000042327	cnga3a/kcnk10b/cngb3.2/ryr1a/atp6v0cb/hrc/mcoln1b/scn5lab///RYR2
MOLNG-2800	pachon_wild_vs_surface_wild	UP	Molecular Functions	GO:0003964	RNA-directed DNA polymerase activity	4/875	16/11006	0.033376285414126	0.2449580947358179	0.2183260775209748	4	1.27	4/1.27	ENSAMXG00000039114/ENSAMXG00000031305/ENSAMXG00000038578/ENSAMXG00000037673	///
MOLNG-2800	pachon_wild_vs_surface_wild	UP	Molecular Functions	GO:0015370	solute:sodium symporter activity	3/875	10/11006	0.0393638497329467	0.2742125803430699	0.2443999947736927	3	0.8	3/0.8	ENSAMXG00000005734/ENSAMXG00000010342/ENSAMXG00000014586	slc23a1/slc6a4a/slc10a2
MOLNG-2800	pachon_wild_vs_surface_wild	UP	Molecular Functions	GO:0016247	channel regulator activity	3/875	10/11006	0.0393638497329467	0.2742125803430699	0.2443999947736927	3	0.8	3/0.8	ENSAMXG00000040771/ENSAMXG00000039460/ENSAMXG00000042225	hpcal4//fxyd6l
MOLNG-2800	pachon_wild_vs_surface_wild	UP	Molecular Functions	GO:0099106	ion channel regulator activity	3/875	10/11006	0.0393638497329467	0.2742125803430699	0.2443999947736927	3	0.8	3/0.8	ENSAMXG00000040771/ENSAMXG00000039460/ENSAMXG00000042225	hpcal4//fxyd6l
MOLNG-2800	pachon_wild_vs_surface_wild	UP	Molecular Functions	GO:0004620	phospholipase activity	8/875	50/11006	0.042082012454372	0.2882617853124484	0.256921760247745	8	3.98	8/3.98	ENSAMXG00000044082/ENSAMXG00000006275/ENSAMXG00000003998/ENSAMXG00000040135/ENSAMXG00000014239/ENSAMXG00000006086/ENSAMXG00000032795/ENSAMXG00000012304	plcd3b/plcd3b/proca1/pla2g12b/plch2a/PLCB4/plcd4a/lipca
MOLNG-2800	pachon_wild_vs_surface_wild	UP	Molecular Functions	GO:0005509	calcium ion binding	40/875	385/11006	0.0480447684937978	0.3201538021078732	0.2853464544334483	40	30.61	40/30.61	ENSAMXG00000014532/ENSAMXG00000044082/ENSAMXG00000014150/ENSAMXG00000043828/ENSAMXG00000005018/ENSAMXG00000002174/ENSAMXG00000029311/ENSAMXG00000004102/ENSAMXG00000005202/ENSAMXG00000006275/ENSAMXG00000008578/ENSAMXG00000032114/ENSAMXG00000004584/ENSAMXG00000018475/ENSAMXG00000032678/ENSAMXG00000040135/ENSAMXG00000013883/ENSAMXG00000014608/ENSAMXG00000039751/ENSAMXG00000033199/ENSAMXG00000011152/…	slc25a13/plcd3b/epdr1//svep1/pcdh15a/pvalb5//fkbp7/plcd3b/ryr1a/rgn/sned1//wu:fd46c06/pla2g12b//HABP2/masp1/cetn3/fkbp10b/hpcal4/anxa4/cntnap1/plch2a//rcn3/matn4/vwa2/dgkab//PLCB4/dlc/PCDH20/PPEF2/RYR2/proza/nkd3/plcd4a/c1s
MOLNG-2800	pachon_wild_vs_surface_wild	UP	Molecular Functions	GO:0050662	coenzyme binding	21/875	180/11006	0.0484613073398048	0.3201538021078732	0.2853464544334483	21	14.31	21/14.31	ENSAMXG00000017574/ENSAMXG00000016122/ENSAMXG00000036798/ENSAMXG00000008628/ENSAMXG00000000539/ENSAMXG00000001375/ENSAMXG00000008119/ENSAMXG00000036404/ENSAMXG00000012538/ENSAMXG00000020893/ENSAMXG00000003540/ENSAMXG00000039259/ENSAMXG00000030360/ENSAMXG00000024715/ENSAMXG00000012558/ENSAMXG00000011187/ENSAMXG00000014048/ENSAMXG00000010173/ENSAMXG00000015280/ENSAMXG00000011762/ENSAMXG00000019455	accs/acbd7/got2a/aifm4/aspdh//agxt2/shmt2/kyat3/gcat/p3h1/pora/ivd/alas1/kyat1//si:ch211-217a12.1/shmt1/idh1/zgc:77439/ddc
MOLNG-2800	pachon_wild_vs_surface_wild	UP	Molecular Functions	GO:0015079	potassium ion transmembrane transporter activity	6/875	34/11006	0.0490746703960973	0.3201538021078732	0.2853464544334483	6	2.7	6/2.7	ENSAMXG00000014880/ENSAMXG00000014290/ENSAMXG00000043324/ENSAMXG00000043478/ENSAMXG00000016585/ENSAMXG00000012162	kcnk10b/atp1a3a///ATP4A/atp1a1a.3
MOLNG-2800	pachon_wild_vs_surface_wild	UP	Biological Process	GO:0006518	peptide metabolic process	101/742	315/9643	4.716612858766484e-38	4.5924187161063135e-35	4.5887905308221545e-35	101	24.24	101/24.24	ENSAMXG00000035085/ENSAMXG00000017796/ENSAMXG00000020614/ENSAMXG00000037393/ENSAMXG00000039638/ENSAMXG00000040781/ENSAMXG00000042563/ENSAMXG00000043611/ENSAMXG00000019847/ENSAMXG00000001717/ENSAMXG00000038704/ENSAMXG00000014181/ENSAMXG00000041157/ENSAMXG00000041315/ENSAMXG00000020662/ENSAMXG00000041019/ENSAMXG00000004832/ENSAMXG00000007371/ENSAMXG00000032680/ENSAMXG00000033866/ENSAMXG00000009773/…	gstt1b/dars1///eif3k/eif3f/eef1db/eef1da/cpdb/rps19//gstt1b/gstr//eif2s3/rps7/rpl5b/rps17/si:dkey-151g10.6/rps16/eif3ba/rpl8/rpl34/uba52/rps14/rpl13/rpl27/rpl31/rpl17/gsta.1/rplp2/rps4x/rpl18//rps3/eef1g/rpl36/rpl10/rps15/RPL19/rps24//zgc:171772/gstt1b/si:dkey-159f12.2/rpl15/rpl21/rpsa/eif5a/rps18/rps13/eif2s1b/rps2/rpl6//rpl29//rpl32/RPL27A/rplp1/iars1/larp6a/rpl13a/rpl12/rps8a/rps3a/rpl35/rpl38…
MOLNG-2800	pachon_wild_vs_surface_wild	UP	Biological Process	GO:0043603	cellular amide metabolic process	111/742	377/9643	6.565287657049769e-38	4.5924187161063135e-35	4.5887905308221545e-35	111	29.01	111/29.01	ENSAMXG00000035085/ENSAMXG00000029060/ENSAMXG00000017796/ENSAMXG00000020614/ENSAMXG00000017914/ENSAMXG00000037393/ENSAMXG00000039638/ENSAMXG00000040781/ENSAMXG00000042563/ENSAMXG00000043611/ENSAMXG00000016233/ENSAMXG00000019847/ENSAMXG00000001717/ENSAMXG00000038704/ENSAMXG00000014181/ENSAMXG00000041157/ENSAMXG00000041315/ENSAMXG00000020662/ENSAMXG00000041019/ENSAMXG00000004832/ENSAMXG00000036404/…	gstt1b/AMDHD1/dars1//hal//eif3k/eif3f/eef1db/eef1da/aldh1l1/cpdb/rps19//gstt1b/gstr//eif2s3/rps7/rpl5b/shmt2/urad/rps17/si:dkey-151g10.6/rps16/eif3ba/rpl8/rpl34/uba52/rps14/rpl13/rpl27/rpl31/rpl17/ormdl1/gsta.1/rplp2/rps4x/rpl18//rps3/eef1g/rpl36/rpl10/rps15/RPL19/rps24//zgc:171772/gstt1b/si:dkey-159f12.2/rpl15/rpl21/rpsa/eif5a/rps18/rps13/eif2s1b/rps2/rpl6//rpl29//rpl32/RPL27A/rplp1/iars1/larp6a…
MOLNG-2800	pachon_wild_vs_surface_wild	UP	Biological Process	GO:0006412	translation	92/742	280/9643	1.3101066722831225e-35	6.1094641150802936e-33	6.104637406287674e-33	92	21.55	92/21.55	ENSAMXG00000017796/ENSAMXG00000037393/ENSAMXG00000039638/ENSAMXG00000040781/ENSAMXG00000042563/ENSAMXG00000043611/ENSAMXG00000001717/ENSAMXG00000038704/ENSAMXG00000020662/ENSAMXG00000041019/ENSAMXG00000004832/ENSAMXG00000007371/ENSAMXG00000032680/ENSAMXG00000033866/ENSAMXG00000009773/ENSAMXG00000043706/ENSAMXG00000035416/ENSAMXG00000037850/ENSAMXG00000019225/ENSAMXG00000006495/ENSAMXG00000039330/…	dars1//eif3k/eif3f/eef1db/eef1da/rps19//eif2s3/rps7/rpl5b/rps17/si:dkey-151g10.6/rps16/eif3ba/rpl8/rpl34/uba52/rps14/rpl13/rpl27/rpl31/rpl17/rplp2/rps4x/rpl18/rps3/eef1g/rpl36/rpl10/rps15/RPL19/rps24//zgc:171772/si:dkey-159f12.2/rpl15/rpl21/rpsa/eif5a/rps18/rps13/eif2s1b/rps2/rpl6//rpl29//rpl32/RPL27A/rplp1/iars1/larp6a/rpl13a/rpl12/rps8a/rps3a/rpl35/rpl38/rps27a/rpl14/rps21/rpl37/rpl18a/rpl23a/f…
MOLNG-2800	pachon_wild_vs_surface_wild	UP	Biological Process	GO:0043043	peptide biosynthetic process	92/742	283/9643	3.4617745980821185e-35	1.2107556656792207e-32	1.209799122698172e-32	92	21.78	92/21.78	ENSAMXG00000017796/ENSAMXG00000037393/ENSAMXG00000039638/ENSAMXG00000040781/ENSAMXG00000042563/ENSAMXG00000043611/ENSAMXG00000001717/ENSAMXG00000038704/ENSAMXG00000020662/ENSAMXG00000041019/ENSAMXG00000004832/ENSAMXG00000007371/ENSAMXG00000032680/ENSAMXG00000033866/ENSAMXG00000009773/ENSAMXG00000043706/ENSAMXG00000035416/ENSAMXG00000037850/ENSAMXG00000019225/ENSAMXG00000006495/ENSAMXG00000039330/…	dars1//eif3k/eif3f/eef1db/eef1da/rps19//eif2s3/rps7/rpl5b/rps17/si:dkey-151g10.6/rps16/eif3ba/rpl8/rpl34/uba52/rps14/rpl13/rpl27/rpl31/rpl17/rplp2/rps4x/rpl18/rps3/eef1g/rpl36/rpl10/rps15/RPL19/rps24//zgc:171772/si:dkey-159f12.2/rpl15/rpl21/rpsa/eif5a/rps18/rps13/eif2s1b/rps2/rpl6//rpl29//rpl32/RPL27A/rplp1/iars1/larp6a/rpl13a/rpl12/rps8a/rps3a/rpl35/rpl38/rps27a/rpl14/rps21/rpl37/rpl18a/rpl23a/f…
MOLNG-2800	pachon_wild_vs_surface_wild	UP	Biological Process	GO:0043604	amide biosynthetic process	94/742	307/9643	1.4287376401600177e-33	3.9976079171677296e-31	3.994449655015796e-31	94	23.62	94/23.62	ENSAMXG00000017796/ENSAMXG00000037393/ENSAMXG00000039638/ENSAMXG00000040781/ENSAMXG00000042563/ENSAMXG00000043611/ENSAMXG00000001717/ENSAMXG00000038704/ENSAMXG00000020662/ENSAMXG00000041019/ENSAMXG00000004832/ENSAMXG00000014396/ENSAMXG00000007371/ENSAMXG00000032680/ENSAMXG00000033866/ENSAMXG00000009773/ENSAMXG00000043706/ENSAMXG00000035416/ENSAMXG00000037850/ENSAMXG00000019225/ENSAMXG00000006495/…	dars1//eif3k/eif3f/eef1db/eef1da/rps19//eif2s3/rps7/rpl5b/urad/rps17/si:dkey-151g10.6/rps16/eif3ba/rpl8/rpl34/uba52/rps14/rpl13/rpl27/rpl31/rpl17/rplp2/rps4x/rpl18/rps3/eef1g/rpl36/rpl10/rps15/RPL19/rps24//zgc:171772/si:dkey-159f12.2/rpl15/rpl21/rpsa/eif5a/rps18/rps13/eif2s1b/rps2/rpl6//rpl29//rpl32/RPL27A/rplp1/iars1/larp6a/rpl13a/rpl12/rps8a/rps3a/rpl35/rpl38/rps27a/rpl14/rps21/rpl37/rpl18a/rpl…
MOLNG-2800	pachon_wild_vs_surface_wild	UP	Biological Process	GO:0015074	DNA integration	19/742	58/9643	2.9483941756912416e-08	6.874672419653411e-06	6.869241167224508e-06	19	4.46	19/4.46	ENSAMXG00000033138/ENSAMXG00000036506/ENSAMXG00000039114/ENSAMXG00000040613/ENSAMXG00000038483/ENSAMXG00000031305/ENSAMXG00000037931/ENSAMXG00000043821/ENSAMXG00000035834/ENSAMXG00000041546/ENSAMXG00000040932/ENSAMXG00000038578/ENSAMXG00000035494/ENSAMXG00000037673/ENSAMXG00000040669/ENSAMXG00000038531/ENSAMXG00000038033/ENSAMXG00000035335/ENSAMXG00000041114	//////////////////
MOLNG-2800	pachon_wild_vs_surface_wild	UP	Biological Process	GO:0006575	cellular modified amino acid metabolic process	16/742	60/9643	7.729834484421214e-06	0.001544862634815	0.0015436421346332	16	4.62	16/4.62	ENSAMXG00000035085/ENSAMXG00000020614/ENSAMXG00000016233/ENSAMXG00000014181/ENSAMXG00000041157/ENSAMXG00000041315/ENSAMXG00000036404/ENSAMXG00000036318/ENSAMXG00000039582/ENSAMXG00000040220/ENSAMXG00000033673/ENSAMXG00000012558/ENSAMXG00000008159/ENSAMXG00000010173/ENSAMXG00000038871/ENSAMXG00000031156	gstt1b//aldh1l1/gstt1b/gstr//shmt2/gsta.1//eef1g/gstt1b/kyat1/ckmt2b/shmt1/si:ch73-267c23.10/pcyox1
MOLNG-2800	pachon_wild_vs_surface_wild	UP	Biological Process	GO:0006414	translational elongation	8/742	19/9643	4.161711829515367e-05	0.0072777935618649	0.0072720438284163	8	1.46	8/1.46	ENSAMXG00000042563/ENSAMXG00000043611/ENSAMXG00000029412/ENSAMXG00000040220/ENSAMXG00000039778/ENSAMXG00000029743/ENSAMXG00000029436/ENSAMXG00000033872	eef1db/eef1da/rplp2/eef1g/eif5a//rplp1/rplp2l
MOLNG-2800	pachon_wild_vs_surface_wild	UP	Biological Process	GO:0006749	glutathione metabolic process	9/742	25/9643	5.9731508173611794e-05	0.0092849311038758	0.0092775956555036	9	1.92	9/1.92	ENSAMXG00000035085/ENSAMXG00000020614/ENSAMXG00000014181/ENSAMXG00000041157/ENSAMXG00000041315/ENSAMXG00000036318/ENSAMXG00000039582/ENSAMXG00000040220/ENSAMXG00000033673	gstt1b//gstt1b/gstr//gsta.1//eef1g/gstt1b
MOLNG-2800	pachon_wild_vs_surface_wild	UP	Biological Process	GO:1901606	alpha-amino acid catabolic process	10/742	31/9643	6.845503866076604e-05	0.0095768599086411	0.0095692938254207	10	2.39	10/2.39	ENSAMXG00000041733/ENSAMXG00000004248/ENSAMXG00000015199/ENSAMXG00000029060/ENSAMXG00000017914/ENSAMXG00000039501/ENSAMXG00000020893/ENSAMXG00000030360/ENSAMXG00000042818/ENSAMXG00000014365	hgd/DDAH1/tdo2b/AMDHD1/hal/ido1/gcat/ivd/aldh4a1/dlst
MOLNG-2800	pachon_wild_vs_surface_wild	UP	Biological Process	GO:0009063	cellular amino acid catabolic process	11/742	39/9643	0.00011791058460256886	0.0149960825326358	0.0149842350576278	11	3.0	11/3	ENSAMXG00000041733/ENSAMXG00000004248/ENSAMXG00000015199/ENSAMXG00000029060/ENSAMXG00000017914/ENSAMXG00000039501/ENSAMXG00000020893/ENSAMXG00000030360/ENSAMXG00000042818/ENSAMXG00000014365/ENSAMXG00000031156	hgd/DDAH1/tdo2b/AMDHD1/hal/ido1/gcat/ivd/aldh4a1/dlst/pcyox1
MOLNG-2800	pachon_wild_vs_surface_wild	UP	Biological Process	GO:1901605	alpha-amino acid metabolic process	16/742	79/9643	0.00028012461160248955	0.0326578609693235	0.0326320600182549	16	6.08	16/6.08	ENSAMXG00000041733/ENSAMXG00000004248/ENSAMXG00000015199/ENSAMXG00000029060/ENSAMXG00000017914/ENSAMXG00000039501/ENSAMXG00000036404/ENSAMXG00000012538/ENSAMXG00000020893/ENSAMXG00000030360/ENSAMXG00000012558/ENSAMXG00000010173/ENSAMXG00000008046/ENSAMXG00000013859/ENSAMXG00000042818/ENSAMXG00000014365	hgd/DDAH1/tdo2b/AMDHD1/hal/ido1/shmt2/kyat3/gcat/ivd/kyat1/shmt1/cbsa/glsa/aldh4a1/dlst
MOLNG-2800	pachon_wild_vs_surface_wild	UP	Biological Process	GO:0006520	cellular amino acid metabolic process	23/742	148/9643	0.0008923411742834993	0.0960296386786627	0.0959537716152621	23	11.39	23/11.39	ENSAMXG00000041733/ENSAMXG00000004248/ENSAMXG00000015199/ENSAMXG00000029060/ENSAMXG00000017796/ENSAMXG00000017914/ENSAMXG00000036798/ENSAMXG00000039501/ENSAMXG00000036404/ENSAMXG00000012538/ENSAMXG00000020893/ENSAMXG00000030360/ENSAMXG00000012558/ENSAMXG00000036265/ENSAMXG00000010173/ENSAMXG00000008046/ENSAMXG00000013859/ENSAMXG00000002290/ENSAMXG00000013712/ENSAMXG00000042818/ENSAMXG00000014365/…	hgd/DDAH1/tdo2b/AMDHD1/dars1/hal/got2a/ido1/shmt2/kyat3/gcat/ivd/kyat1/iars1/shmt1/cbsa/glsa/glud1b/acy1/aldh4a1/dlst/pcyox1/ddc
MOLNG-2800	pachon_wild_vs_surface_wild	UP	Biological Process	GO:0044057	regulation of system process	10/742	43/9643	0.0012719748027329	0.1271066249302435	0.1270062058668699	10	3.31	10/3.31	ENSAMXG00000020761/ENSAMXG00000001543/ENSAMXG00000030775/ENSAMXG00000021168/ENSAMXG00000026034/ENSAMXG00000040461/ENSAMXG00000021379/ENSAMXG00000044072/ENSAMXG00000032631/ENSAMXG00000032596	tnnt2e/vdac2/tnnt2b/hrc/adrb2a/edn2/scn5lab/chrm2a/emp2/
MOLNG-2800	pachon_wild_vs_surface_wild	UP	Biological Process	GO:1901657	glycosyl compound metabolic process	9/742	38/9643	0.001925347489729	0.1710545061702405	0.1709193666107968	9	2.92	9/2.92	ENSAMXG00000043191/ENSAMXG00000034136/ENSAMXG00000040503/ENSAMXG00000041731/ENSAMXG00000004003/ENSAMXG00000043014/ENSAMXG00000029524/ENSAMXG00000007985/ENSAMXG00000024395	PRPSAP1/nme2b.1/pnp4b/NME2/zgc:174895/adka//pnp5a/tyw5
MOLNG-2800	pachon_wild_vs_surface_wild	UP	Biological Process	GO:0006811	ion transport	55/742	483/9643	0.0019563060033765	0.1710545061702405	0.1709193666107968	55	37.17	55/37.17	ENSAMXG00000035630/ENSAMXG00000014880/ENSAMXG00000014532/ENSAMXG00000000107/ENSAMXG00000034391/ENSAMXG00000031619/ENSAMXG00000001543/ENSAMXG00000021060/ENSAMXG00000030429/ENSAMXG00000031866/ENSAMXG00000000590/ENSAMXG00000039880/ENSAMXG00000041130/ENSAMXG00000003998/ENSAMXG00000008578/ENSAMXG00000013051/ENSAMXG00000012506/ENSAMXG00000035010/ENSAMXG00000005734/ENSAMXG00000036598/ENSAMXG00000040135/…	cnga3a/kcnk10b/slc25a13/cngb3.2/cox8b/slc8b1/vdac2/BEST3/cox4i2/atp5mc3b/atp8b4/vdac1/smdt1a/proca1/ryr1a/vdac3/SLC12A2/tfr1b/slc23a1/atp6v0cb/pla2g12b/hrc/slc6a4a//cox5b2/si:dkey-49c17.4///mcoln1b/ucp1//slc16a7/slc39a13/clic5b//zgc:56095/fxyd6l/scn5lab//atp2b1b/sfxn2/atp1a3a/gabrr3b/slc10a2///RYR2/zgc:103678/cax2//slc39a8/SLC41A3/ATP4A//atp1a1a.3
MOLNG-2800	pachon_wild_vs_surface_wild	UP	Biological Process	GO:0009074	aromatic amino acid family catabolic process	5/742	14/9643	0.0029627060102664	0.2438132769625184	0.2436206552095289	5	1.08	5/1.08	ENSAMXG00000041733/ENSAMXG00000015199/ENSAMXG00000029060/ENSAMXG00000017914/ENSAMXG00000039501	hgd/tdo2b/AMDHD1/hal/ido1
MOLNG-2800	pachon_wild_vs_surface_wild	UP	Biological Process	GO:0098754	detoxification	9/742	41/9643	0.003362201250313	0.2502753056478259	0.2500775786466369	9	3.15	9/3.15	ENSAMXG00000015995/ENSAMXG00000041315/ENSAMXG00000041988/ENSAMXG00000008618/ENSAMXG00000025411/ENSAMXG00000039988/ENSAMXG00000005051/ENSAMXG00000037570/ENSAMXG00000042973	gpx4a//gpx4b/sod1/sod3b/si:ch211-175m2.5/prdx6/prdx4/txndc12
MOLNG-2800	pachon_wild_vs_surface_wild	UP	Biological Process	GO:0016054	organic acid catabolic process	12/742	65/9643	0.003577917164372	0.2502753056478259	0.2500775786466369	12	5.0	12/5	ENSAMXG00000041733/ENSAMXG00000004248/ENSAMXG00000015199/ENSAMXG00000029060/ENSAMXG00000017914/ENSAMXG00000016233/ENSAMXG00000039501/ENSAMXG00000020893/ENSAMXG00000030360/ENSAMXG00000042818/ENSAMXG00000014365/ENSAMXG00000031156	hgd/DDAH1/tdo2b/AMDHD1/hal/aldh1l1/ido1/gcat/ivd/aldh4a1/dlst/pcyox1
MOLNG-2800	pachon_wild_vs_surface_wild	UP	Biological Process	GO:0046395	carboxylic acid catabolic process	12/742	65/9643	0.003577917164372	0.2502753056478259	0.2500775786466369	12	5.0	12/5	ENSAMXG00000041733/ENSAMXG00000004248/ENSAMXG00000015199/ENSAMXG00000029060/ENSAMXG00000017914/ENSAMXG00000016233/ENSAMXG00000039501/ENSAMXG00000020893/ENSAMXG00000030360/ENSAMXG00000042818/ENSAMXG00000014365/ENSAMXG00000031156	hgd/DDAH1/tdo2b/AMDHD1/hal/aldh1l1/ido1/gcat/ivd/aldh4a1/dlst/pcyox1
MOLNG-2800	pachon_wild_vs_surface_wild	UP	Biological Process	GO:0043648	dicarboxylic acid metabolic process	5/742	15/9643	0.0041658818434338	0.2775270809030452	0.277307823963917	5	1.15	5/1.15	ENSAMXG00000029060/ENSAMXG00000038918/ENSAMXG00000017914/ENSAMXG00000016233/ENSAMXG00000042818	AMDHD1/mdh2/hal/aldh1l1/aldh4a1
MOLNG-2800	pachon_wild_vs_surface_wild	UP	Biological Process	GO:0006790	sulfur compound metabolic process	15/742	93/9643	0.004668499269326	0.2839665425124847	0.2837421981540046	15	7.16	15/7.16	ENSAMXG00000035085/ENSAMXG00000020614/ENSAMXG00000008237/ENSAMXG00000014181/ENSAMXG00000041157/ENSAMXG00000041315/ENSAMXG00000042237/ENSAMXG00000036318/ENSAMXG00000039582/ENSAMXG00000040220/ENSAMXG00000033673/ENSAMXG00000008046/ENSAMXG00000014365/ENSAMXG00000035038/ENSAMXG00000031156	gstt1b//ahcy/gstt1b/gstr//tpk1/gsta.1//eef1g/gstt1b/cbsa/dlst/ISCU/pcyox1
MOLNG-2800	pachon_wild_vs_surface_wild	UP	Biological Process	GO:0044282	small molecule catabolic process	15/742	93/9643	0.004668499269326	0.2839665425124847	0.2837421981540046	15	7.16	15/7.16	ENSAMXG00000041733/ENSAMXG00000004248/ENSAMXG00000015199/ENSAMXG00000029060/ENSAMXG00000017914/ENSAMXG00000016233/ENSAMXG00000039501/ENSAMXG00000014396/ENSAMXG00000020893/ENSAMXG00000030360/ENSAMXG00000006152/ENSAMXG00000042818/ENSAMXG00000014365/ENSAMXG00000017383/ENSAMXG00000031156	hgd/DDAH1/tdo2b/AMDHD1/hal/aldh1l1/ido1/urad/gcat/ivd/cyp7a1/aldh4a1/dlst/uox/pcyox1
MOLNG-2800	pachon_wild_vs_surface_wild	UP	Biological Process	GO:0009116	nucleoside metabolic process	8/742	37/9643	0.0061619817373962	0.3448244980246963	0.3445520735689378	8	2.85	8/2.85	ENSAMXG00000043191/ENSAMXG00000034136/ENSAMXG00000040503/ENSAMXG00000041731/ENSAMXG00000004003/ENSAMXG00000043014/ENSAMXG00000029524/ENSAMXG00000007985	PRPSAP1/nme2b.1/pnp4b/NME2/zgc:174895/adka//pnp5a
MOLNG-2800	pachon_wild_vs_surface_wild	UP	Biological Process	GO:0098869	cellular oxidant detoxification	8/742	37/9643	0.0061619817373962	0.3448244980246963	0.3445520735689378	8	2.85	8/2.85	ENSAMXG00000015995/ENSAMXG00000041315/ENSAMXG00000041988/ENSAMXG00000008618/ENSAMXG00000025411/ENSAMXG00000039988/ENSAMXG00000005051/ENSAMXG00000037570	gpx4a//gpx4b/sod1/sod3b/si:ch211-175m2.5/prdx6/prdx4
MOLNG-2800	pachon_wild_vs_surface_wild	UP	Biological Process	GO:0097237	cellular response to toxic substance	8/742	38/9643	0.0072917508701075	0.3571940395981957	0.3569118427345878	8	2.92	8/2.92	ENSAMXG00000015995/ENSAMXG00000041315/ENSAMXG00000041988/ENSAMXG00000008618/ENSAMXG00000025411/ENSAMXG00000039988/ENSAMXG00000005051/ENSAMXG00000037570	gpx4a//gpx4b/sod1/sod3b/si:ch211-175m2.5/prdx6/prdx4
MOLNG-2800	pachon_wild_vs_surface_wild	UP	Biological Process	GO:1990748	cellular detoxification	8/742	38/9643	0.0072917508701075	0.3571940395981957	0.3569118427345878	8	2.92	8/2.92	ENSAMXG00000015995/ENSAMXG00000041315/ENSAMXG00000041988/ENSAMXG00000008618/ENSAMXG00000025411/ENSAMXG00000039988/ENSAMXG00000005051/ENSAMXG00000037570	gpx4a//gpx4b/sod1/sod3b/si:ch211-175m2.5/prdx6/prdx4
MOLNG-2800	pachon_wild_vs_surface_wild	UP	Biological Process	GO:0007600	sensory perception	10/742	54/9643	0.0073749422879346	0.3571940395981957	0.3569118427345878	10	4.16	10/4.16	ENSAMXG00000035630/ENSAMXG00000000107/ENSAMXG00000002174/ENSAMXG00000003217/ENSAMXG00000035849/ENSAMXG00000020117/ENSAMXG00000007488/ENSAMXG00000035157/ENSAMXG00000032621/ENSAMXG00000015666	cnga3a/cngb3.2/pcdh15a//pdca/ush1gb/tmem132e/clic5b/pde6gb/PPEF2
MOLNG-2800	pachon_wild_vs_surface_wild	UP	Biological Process	GO:0060401	cytosolic calcium ion transport	4/742	11/9643	0.0074043081832363	0.3571940395981957	0.3569118427345878	4	0.85	4/0.85	ENSAMXG00000001543/ENSAMXG00000041130/ENSAMXG00000008578/ENSAMXG00000042327	vdac2/smdt1a/ryr1a/RYR2
MOLNG-2800	pachon_wild_vs_surface_wild	UP	Biological Process	GO:0034220	ion transmembrane transport	34/742	288/9643	0.0079079032825913	0.3599547126947604	0.3596703347945088	34	22.16	34/22.16	ENSAMXG00000035630/ENSAMXG00000014880/ENSAMXG00000014532/ENSAMXG00000000107/ENSAMXG00000034391/ENSAMXG00000001543/ENSAMXG00000021060/ENSAMXG00000030429/ENSAMXG00000031866/ENSAMXG00000039880/ENSAMXG00000041130/ENSAMXG00000008578/ENSAMXG00000013051/ENSAMXG00000005734/ENSAMXG00000036598/ENSAMXG00000021168/ENSAMXG00000012433/ENSAMXG00000003723/ENSAMXG00000033104/ENSAMXG00000015746/ENSAMXG00000015134/…	cnga3a/kcnk10b/slc25a13/cngb3.2/cox8b/vdac2/BEST3/cox4i2/atp5mc3b/vdac1/smdt1a/ryr1a/vdac3/slc23a1/atp6v0cb/hrc//cox5b2/si:dkey-49c17.4//mcoln1b/ucp1/clic5b/scn5lab//atp2b1b/sfxn2/atp1a3a/gabrr3b///RYR2/zgc:103678/atp1a1a.3
MOLNG-2800	pachon_wild_vs_surface_wild	UP	Biological Process	GO:1903522	regulation of blood circulation	7/742	31/9643	0.0079761230118209	0.3599547126947604	0.3596703347945088	7	2.39	7/2.39	ENSAMXG00000001543/ENSAMXG00000021168/ENSAMXG00000026034/ENSAMXG00000040461/ENSAMXG00000021379/ENSAMXG00000044072/ENSAMXG00000032596	vdac2/hrc/adrb2a/edn2/scn5lab/chrm2a/
MOLNG-2800	pachon_wild_vs_surface_wild	UP	Biological Process	GO:0006812	cation transport	34/742	291/9643	0.0092165985467952	0.4029381677177027	0.4026198312547378	34	22.39	34/22.39	ENSAMXG00000035630/ENSAMXG00000014880/ENSAMXG00000000107/ENSAMXG00000034391/ENSAMXG00000031619/ENSAMXG00000001543/ENSAMXG00000030429/ENSAMXG00000031866/ENSAMXG00000041130/ENSAMXG00000008578/ENSAMXG00000035010/ENSAMXG00000036598/ENSAMXG00000021168/ENSAMXG00000010342/ENSAMXG00000012433/ENSAMXG00000003723/ENSAMXG00000033597/ENSAMXG00000015134/ENSAMXG00000005590/ENSAMXG00000034037/ENSAMXG00000042507/…	cnga3a/kcnk10b/cngb3.2/cox8b/slc8b1/vdac2/cox4i2/atp5mc3b/smdt1a/ryr1a/tfr1b/atp6v0cb/hrc/slc6a4a//cox5b2//mcoln1b/ucp1/slc39a13/zgc:56095/scn5lab//atp2b1b/atp1a3a/slc10a2///RYR2/cax2/slc39a8/SLC41A3/ATP4A/atp1a1a.3
MOLNG-2800	pachon_wild_vs_surface_wild	UP	Biological Process	GO:0009072	aromatic amino acid family metabolic process	5/742	18/9643	0.0097991749791379	0.4154256301761806	0.4150974281433867	5	1.39	5/1.39	ENSAMXG00000041733/ENSAMXG00000015199/ENSAMXG00000029060/ENSAMXG00000017914/ENSAMXG00000039501	hgd/tdo2b/AMDHD1/hal/ido1
MOLNG-2800	pachon_wild_vs_surface_wild	UP	Biological Process	GO:0010721	negative regulation of cell development	4/742	12/9643	0.0104392733814817	0.4295453959027344	0.4292060387185066	4	0.92	4/0.92	ENSAMXG00000031784/ENSAMXG00000040619/ENSAMXG00000011343/ENSAMXG00000018426	her8a/her9/bmp15/cct3
MOLNG-2800	pachon_wild_vs_surface_wild	UP	Biological Process	GO:0051186	cofactor metabolic process	20/742	150/9643	0.0108548385658238	0.4338834043882151	0.4335406200124524	20	11.54	20/11.54	ENSAMXG00000035085/ENSAMXG00000020614/ENSAMXG00000016233/ENSAMXG00000008237/ENSAMXG00000000539/ENSAMXG00000014181/ENSAMXG00000041157/ENSAMXG00000041315/ENSAMXG00000036404/ENSAMXG00000042237/ENSAMXG00000036318/ENSAMXG00000039582/ENSAMXG00000040220/ENSAMXG00000033673/ENSAMXG00000034191/ENSAMXG00000024715/ENSAMXG00000010173/ENSAMXG00000014365/ENSAMXG00000035038/ENSAMXG00000042973	gstt1b//aldh1l1/ahcy/aspdh/gstt1b/gstr//shmt2/tpk1/gsta.1//eef1g/gstt1b/hmox2a/alas1/shmt1/dlst/ISCU/txndc12
MOLNG-2800	pachon_wild_vs_surface_wild	UP	Biological Process	GO:0030218	erythrocyte differentiation	12/742	76/9643	0.0127142003917668	0.4940879541133831	0.4936976058557412	12	5.85	12/5.85	ENSAMXG00000029157/ENSAMXG00000001717/ENSAMXG00000039330/ENSAMXG00000013642/ENSAMXG00000038991/ENSAMXG00000029436/ENSAMXG00000029232/ENSAMXG00000034710/ENSAMXG00000041448/ENSAMXG00000042254/ENSAMXG00000030123/ENSAMXG00000040272	lpar3/rps19/rpl27/rps3/hemgn/rplp1/rpl35/rpl11/rpl35a/rps15a/klf1/gata1a
MOLNG-2800	pachon_wild_vs_surface_wild	UP	Biological Process	GO:0034101	erythrocyte homeostasis	12/742	77/9643	0.014043236011608	0.5218936741849243	0.5214813583518901	12	5.92	12/5.92	ENSAMXG00000029157/ENSAMXG00000001717/ENSAMXG00000039330/ENSAMXG00000013642/ENSAMXG00000038991/ENSAMXG00000029436/ENSAMXG00000029232/ENSAMXG00000034710/ENSAMXG00000041448/ENSAMXG00000042254/ENSAMXG00000030123/ENSAMXG00000040272	lpar3/rps19/rpl27/rps3/hemgn/rplp1/rpl35/rpl11/rpl35a/rps15a/klf1/gata1a
MOLNG-2800	pachon_wild_vs_surface_wild	UP	Biological Process	GO:1901659	glycosyl compound biosynthetic process	4/742	13/9643	0.0141758110214632	0.5218936741849243	0.5214813583518901	4	1.0	4/1	ENSAMXG00000034136/ENSAMXG00000041731/ENSAMXG00000043014/ENSAMXG00000024395	nme2b.1/NME2/adka/tyw5
MOLNG-2800	pachon_wild_vs_surface_wild	UP	Biological Process	GO:0055082	cellular chemical homeostasis	9/742	53/9643	0.0186603613496073	0.6659951694477548	0.6654690079580291	9	4.08	9/4.08	ENSAMXG00000041130/ENSAMXG00000008578/ENSAMXG00000035010/ENSAMXG00000033597/ENSAMXG00000006152/ENSAMXG00000042507/ENSAMXG00000008210/ENSAMXG00000001843/ENSAMXG00000042327	smdt1a/ryr1a/tfr1b//cyp7a1/zgc:56095/homer1b/kdsr/RYR2
MOLNG-2800	pachon_wild_vs_surface_wild	UP	Biological Process	GO:0002262	myeloid cell homeostasis	12/742	81/9643	0.0204380958241085	0.6659951694477548	0.6654690079580291	12	6.23	12/6.23	ENSAMXG00000029157/ENSAMXG00000001717/ENSAMXG00000039330/ENSAMXG00000013642/ENSAMXG00000038991/ENSAMXG00000029436/ENSAMXG00000029232/ENSAMXG00000034710/ENSAMXG00000041448/ENSAMXG00000042254/ENSAMXG00000030123/ENSAMXG00000040272	lpar3/rps19/rpl27/rps3/hemgn/rplp1/rpl35/rpl11/rpl35a/rps15a/klf1/gata1a
MOLNG-2800	pachon_wild_vs_surface_wild	UP	Biological Process	GO:0009144	purine nucleoside triphosphate metabolic process	6/742	29/9643	0.0209462383528957	0.6659951694477548	0.6654690079580291	6	2.23	6/2.23	ENSAMXG00000034136/ENSAMXG00000031866/ENSAMXG00000041731/ENSAMXG00000012433/ENSAMXG00000040194/ENSAMXG00000014365	nme2b.1/atp5mc3b/NME2///dlst
MOLNG-2800	pachon_wild_vs_surface_wild	UP	Biological Process	GO:0009145	purine nucleoside triphosphate biosynthetic process	6/742	29/9643	0.0209462383528957	0.6659951694477548	0.6654690079580291	6	2.23	6/2.23	ENSAMXG00000034136/ENSAMXG00000031866/ENSAMXG00000041731/ENSAMXG00000012433/ENSAMXG00000040194/ENSAMXG00000014365	nme2b.1/atp5mc3b/NME2///dlst
MOLNG-2800	pachon_wild_vs_surface_wild	UP	Biological Process	GO:0009205	purine ribonucleoside triphosphate metabolic process	6/742	29/9643	0.0209462383528957	0.6659951694477548	0.6654690079580291	6	2.23	6/2.23	ENSAMXG00000034136/ENSAMXG00000031866/ENSAMXG00000041731/ENSAMXG00000012433/ENSAMXG00000040194/ENSAMXG00000014365	nme2b.1/atp5mc3b/NME2///dlst
MOLNG-2800	pachon_wild_vs_surface_wild	UP	Biological Process	GO:0009206	purine ribonucleoside triphosphate biosynthetic process	6/742	29/9643	0.0209462383528957	0.6659951694477548	0.6654690079580291	6	2.23	6/2.23	ENSAMXG00000034136/ENSAMXG00000031866/ENSAMXG00000041731/ENSAMXG00000012433/ENSAMXG00000040194/ENSAMXG00000014365	nme2b.1/atp5mc3b/NME2///dlst
MOLNG-2800	pachon_wild_vs_surface_wild	UP	Biological Process	GO:0009636	response to toxic substance	9/742	55/9643	0.0233645236737101	0.7263770804337879	0.7258032149400477	9	4.23	9/4.23	ENSAMXG00000015995/ENSAMXG00000041315/ENSAMXG00000041988/ENSAMXG00000008618/ENSAMXG00000025411/ENSAMXG00000039988/ENSAMXG00000005051/ENSAMXG00000037570/ENSAMXG00000042973	gpx4a//gpx4b/sod1/sod3b/si:ch211-175m2.5/prdx6/prdx4/txndc12
MOLNG-2800	pachon_wild_vs_surface_wild	UP	Biological Process	GO:0017144	drug metabolic process	15/742	113/9643	0.0261103576316724	0.7940954418849956	0.79346807631261	15	8.7	15/8.7	ENSAMXG00000015767/ENSAMXG00000041733/ENSAMXG00000004248/ENSAMXG00000017914/ENSAMXG00000031866/ENSAMXG00000008237/ENSAMXG00000036404/ENSAMXG00000014396/ENSAMXG00000043014/ENSAMXG00000042237/ENSAMXG00000012433/ENSAMXG00000010173/ENSAMXG00000040194/ENSAMXG00000014365/ENSAMXG00000042973	adh5/hgd/DDAH1/hal/atp5mc3b/ahcy/shmt2/urad/adka/tpk1//shmt1//dlst/txndc12
MOLNG-2800	pachon_wild_vs_surface_wild	UP	Biological Process	GO:0051726	regulation of cell cycle	18/742	144/9643	0.0275000903367815	0.815515182137288	0.8148708941562158	18	11.08	18/11.08	ENSAMXG00000037017/ENSAMXG00000010785/ENSAMXG00000029270/ENSAMXG00000033000/ENSAMXG00000018968/ENSAMXG00000041019/ENSAMXG00000006495/ENSAMXG00000020354/ENSAMXG00000043642/ENSAMXG00000007922/ENSAMXG00000006243/ENSAMXG00000029232/ENSAMXG00000041598/ENSAMXG00000008499/ENSAMXG00000006772/ENSAMXG00000042254/ENSAMXG00000033337/ENSAMXG00000012006	mdka/PKP4/ccni//ccng1/rps7/rpl13/cdk1/pgrmc1/rps18/rps8a/rpl35/rpl23a/rpl7/rpl36a/rps15a/cdkn1ba/CDC25B
MOLNG-2800	pachon_wild_vs_surface_wild	UP	Biological Process	GO:0050953	sensory perception of light stimulus	5/742	23/9643	0.0279805066065688	0.815515182137288	0.8148708941562158	5	1.77	5/1.77	ENSAMXG00000035630/ENSAMXG00000000107/ENSAMXG00000035849/ENSAMXG00000020117/ENSAMXG00000032621	cnga3a/cngb3.2/pdca/ush1gb/pde6gb
MOLNG-2800	pachon_wild_vs_surface_wild	UP	Biological Process	GO:0009165	nucleotide biosynthetic process	16/742	127/9643	0.0340367450651757	0.8388375889310121	0.8381748753623899	16	9.77	16/9.77	ENSAMXG00000043191/ENSAMXG00000005419/ENSAMXG00000034136/ENSAMXG00000031866/ENSAMXG00000041731/ENSAMXG00000000539/ENSAMXG00000002803/ENSAMXG00000043014/ENSAMXG00000029524/ENSAMXG00000012433/ENSAMXG00000031927/ENSAMXG00000040194/ENSAMXG00000029025/ENSAMXG00000021803/ENSAMXG00000032942/ENSAMXG00000014365	PRPSAP1/paics/nme2b.1/atp5mc3b/NME2/aspdh/ak2/adka///dtymk/////dlst
MOLNG-2800	pachon_wild_vs_surface_wild	UP	Biological Process	GO:0098656	anion transmembrane transport	10/742	68/9643	0.0341698979982562	0.8388375889310121	0.8381748753623899	10	5.23	10/5.23	ENSAMXG00000014532/ENSAMXG00000001543/ENSAMXG00000021060/ENSAMXG00000039880/ENSAMXG00000013051/ENSAMXG00000005734/ENSAMXG00000015746/ENSAMXG00000035157/ENSAMXG00000007933/ENSAMXG00000005093	slc25a13/vdac2/BEST3/vdac1/vdac3/slc23a1//clic5b/gabrr3b/zgc:103678
MOLNG-2800	pachon_wild_vs_surface_wild	UP	Biological Process	GO:0006875	cellular metal ion homeostasis	7/742	41/9643	0.0350715161445088	0.8388375889310121	0.8381748753623899	7	3.15	7/3.15	ENSAMXG00000041130/ENSAMXG00000008578/ENSAMXG00000035010/ENSAMXG00000033597/ENSAMXG00000042507/ENSAMXG00000008210/ENSAMXG00000042327	smdt1a/ryr1a/tfr1b//zgc:56095/homer1b/RYR2
MOLNG-2800	pachon_wild_vs_surface_wild	UP	Biological Process	GO:0009070	serine family amino acid biosynthetic process	3/742	10/9643	0.0361731946780077	0.8388375889310121	0.8381748753623899	3	0.77	3/0.77	ENSAMXG00000036404/ENSAMXG00000010173/ENSAMXG00000008046	shmt2/shmt1/cbsa
MOLNG-2800	pachon_wild_vs_surface_wild	UP	Biological Process	GO:0009994	oocyte differentiation	3/742	10/9643	0.0361731946780077	0.8388375889310121	0.8381748753623899	3	0.77	3/0.77	ENSAMXG00000010360/ENSAMXG00000011343/ENSAMXG00000043642	henmt1/bmp15/pgrmc1
MOLNG-2800	pachon_wild_vs_surface_wild	UP	Biological Process	GO:0020027	hemoglobin metabolic process	3/742	10/9643	0.0361731946780077	0.8388375889310121	0.8381748753623899	3	0.77	3/0.77	ENSAMXG00000001717/ENSAMXG00000035010/ENSAMXG00000034710	rps19/tfr1b/rpl11
MOLNG-2800	pachon_wild_vs_surface_wild	UP	Biological Process	GO:0042136	neurotransmitter biosynthetic process	3/742	10/9643	0.0361731946780077	0.8388375889310121	0.8381748753623899	3	0.77	3/0.77	ENSAMXG00000004248/ENSAMXG00000036404/ENSAMXG00000010173	DDAH1/shmt2/shmt1
MOLNG-2800	pachon_wild_vs_surface_wild	UP	Biological Process	GO:0042446	hormone biosynthetic process	3/742	10/9643	0.0361731946780077	0.8388375889310121	0.8381748753623899	3	0.77	3/0.77	ENSAMXG00000037805/ENSAMXG00000038493/ENSAMXG00000005286	hsd17b3/dio1/
MOLNG-2800	pachon_wild_vs_surface_wild	UP	Biological Process	GO:0042541	hemoglobin biosynthetic process	3/742	10/9643	0.0361731946780077	0.8388375889310121	0.8381748753623899	3	0.77	3/0.77	ENSAMXG00000001717/ENSAMXG00000035010/ENSAMXG00000034710	rps19/tfr1b/rpl11
MOLNG-2800	pachon_wild_vs_surface_wild	UP	Biological Process	GO:0046328	regulation of JNK cascade	3/742	10/9643	0.0361731946780077	0.8388375889310121	0.8381748753623899	3	0.77	3/0.77	ENSAMXG00000033861/ENSAMXG00000010628/ENSAMXG00000041131	traf4a/ankrd6b/sh3rf2
MOLNG-2800	pachon_wild_vs_surface_wild	UP	Biological Process	GO:0048599	oocyte development	3/742	10/9643	0.0361731946780077	0.8388375889310121	0.8381748753623899	3	0.77	3/0.77	ENSAMXG00000010360/ENSAMXG00000011343/ENSAMXG00000043642	henmt1/bmp15/pgrmc1
MOLNG-2800	pachon_wild_vs_surface_wild	UP	Biological Process	GO:1903046	meiotic cell cycle process	3/742	10/9643	0.0361731946780077	0.8388375889310121	0.8381748753623899	3	0.77	3/0.77	ENSAMXG00000043642/ENSAMXG00000016490/ENSAMXG00000043957	pgrmc1/sycp1/
MOLNG-2800	pachon_wild_vs_surface_wild	UP	Biological Process	GO:0051321	meiotic cell cycle	4/742	17/9643	0.0369293147063499	0.8388375889310121	0.8381748753623899	4	1.31	4/1.31	ENSAMXG00000043642/ENSAMXG00000016490/ENSAMXG00000043957/ENSAMXG00000013811	pgrmc1/sycp1//tdrd12
MOLNG-2800	pachon_wild_vs_surface_wild	UP	Biological Process	GO:0009913	epidermal cell differentiation	5/742	25/9643	0.0389342358061939	0.8388375889310121	0.8381748753623899	5	1.92	5/1.92	ENSAMXG00000005018/ENSAMXG00000002174/ENSAMXG00000007488/ENSAMXG00000015134/ENSAMXG00000013690	svep1/pcdh15a/tmem132e/mcoln1b/kdf1b
MOLNG-2800	pachon_wild_vs_surface_wild	UP	Biological Process	GO:0030178	negative regulation of Wnt signaling pathway	5/742	25/9643	0.0389342358061939	0.8388375889310121	0.8381748753623899	5	1.92	5/1.92	ENSAMXG00000002584/ENSAMXG00000041988/ENSAMXG00000010628/ENSAMXG00000020692/ENSAMXG00000015178	rack1/gpx4b/ankrd6b/nkd3/AXIN2
MOLNG-2800	pachon_wild_vs_surface_wild	UP	Biological Process	GO:1990542	mitochondrial transmembrane transport	5/742	25/9643	0.0389342358061939	0.8388375889310121	0.8381748753623899	5	1.92	5/1.92	ENSAMXG00000001543/ENSAMXG00000041130/ENSAMXG00000015746/ENSAMXG00000005590/ENSAMXG00000005093	vdac2/smdt1a//ucp1/zgc:103678
MOLNG-2800	pachon_wild_vs_surface_wild	UP	Biological Process	GO:0006082	organic acid metabolic process	34/742	324/9643	0.0389738693927918	0.8388375889310121	0.8381748753623899	34	24.93	34/24.93	ENSAMXG00000041733/ENSAMXG00000004248/ENSAMXG00000015199/ENSAMXG00000029060/ENSAMXG00000017796/ENSAMXG00000038918/ENSAMXG00000017914/ENSAMXG00000036798/ENSAMXG00000016233/ENSAMXG00000039501/ENSAMXG00000036404/ENSAMXG00000014396/ENSAMXG00000012538/ENSAMXG00000020893/ENSAMXG00000030360/ENSAMXG00000032066/ENSAMXG00000012558/ENSAMXG00000036265/ENSAMXG00000030317/ENSAMXG00000006152/ENSAMXG00000010173/…	hgd/DDAH1/tdo2b/AMDHD1/dars1/mdh2/hal/got2a/aldh1l1/ido1/shmt2/urad/kyat3/gcat/ivd/elovl8b/kyat1/iars1/pgam2/cyp7a1/shmt1/cbsa/glsa/glud1b/idh1/acy1//si:dkey-61p9.11/aldh4a1/dlst/mlsl/uox/pcyox1/ddc
MOLNG-2800	pachon_wild_vs_surface_wild	UP	Biological Process	GO:1901293	nucleoside phosphate biosynthetic process	16/742	131/9643	0.0434876124456738	0.8604026186817743	0.859722867920241	16	10.08	16/10.08	ENSAMXG00000043191/ENSAMXG00000005419/ENSAMXG00000034136/ENSAMXG00000031866/ENSAMXG00000041731/ENSAMXG00000000539/ENSAMXG00000002803/ENSAMXG00000043014/ENSAMXG00000029524/ENSAMXG00000012433/ENSAMXG00000031927/ENSAMXG00000040194/ENSAMXG00000029025/ENSAMXG00000021803/ENSAMXG00000032942/ENSAMXG00000014365	PRPSAP1/paics/nme2b.1/atp5mc3b/NME2/aspdh/ak2/adka///dtymk/////dlst
MOLNG-2800	pachon_wild_vs_surface_wild	UP	Biological Process	GO:0050906	detection of stimulus involved in sensory perception	4/742	18/9643	0.044680783199839	0.8604026186817743	0.859722867920241	4	1.39	4/1.39	ENSAMXG00000002174/ENSAMXG00000003217/ENSAMXG00000007488/ENSAMXG00000015666	pcdh15a//tmem132e/PPEF2
MOLNG-2800	pachon_wild_vs_surface_wild	UP	Biological Process	GO:0003008	system process	23/742	207/9643	0.047016773938456	0.8604026186817743	0.859722867920241	23	15.93	23/15.93	ENSAMXG00000035630/ENSAMXG00000000107/ENSAMXG00000002174/ENSAMXG00000003217/ENSAMXG00000020761/ENSAMXG00000006747/ENSAMXG00000001543/ENSAMXG00000035849/ENSAMXG00000020117/ENSAMXG00000008578/ENSAMXG00000030775/ENSAMXG00000021168/ENSAMXG00000007488/ENSAMXG00000026034/ENSAMXG00000035157/ENSAMXG00000032621/ENSAMXG00000040461/ENSAMXG00000021379/ENSAMXG00000044072/ENSAMXG00000015666/ENSAMXG00000032631/…	cnga3a/cngb3.2/pcdh15a//tnnt2e/sgcd/vdac2/pdca/ush1gb/ryr1a/tnnt2b/hrc/tmem132e/adrb2a/clic5b/pde6gb/edn2/scn5lab/chrm2a/PPEF2/emp2/dlst/
MOLNG-2800	pachon_wild_vs_surface_wild	UP	Biological Process	GO:0008544	epidermis development	6/742	35/9643	0.0485196726594837	0.8604026186817743	0.859722867920241	6	2.69	6/2.69	ENSAMXG00000005018/ENSAMXG00000002174/ENSAMXG00000012672/ENSAMXG00000007488/ENSAMXG00000015134/ENSAMXG00000013690	svep1/pcdh15a/arhgef19/tmem132e/mcoln1b/kdf1b
MOLNG-2800	pachon_wild_vs_surface_wild	UP	Biological Process	GO:0006873	cellular ion homeostasis	7/742	44/9643	0.049075600808998	0.8604026186817743	0.859722867920241	7	3.39	7/3.39	ENSAMXG00000041130/ENSAMXG00000008578/ENSAMXG00000035010/ENSAMXG00000033597/ENSAMXG00000042507/ENSAMXG00000008210/ENSAMXG00000042327	smdt1a/ryr1a/tfr1b//zgc:56095/homer1b/RYR2
MOLNG-2800	pachon_wild_vs_surface_wild	UP	Biological Process	GO:0030003	cellular cation homeostasis	7/742	44/9643	0.049075600808998	0.8604026186817743	0.859722867920241	7	3.39	7/3.39	ENSAMXG00000041130/ENSAMXG00000008578/ENSAMXG00000035010/ENSAMXG00000033597/ENSAMXG00000042507/ENSAMXG00000008210/ENSAMXG00000042327	smdt1a/ryr1a/tfr1b//zgc:56095/homer1b/RYR2
MOLNG-2800	pachon_wild_vs_surface_wild	Down	Cellular Components	GO:0005794	Golgi apparatus	47/559	312/8458	6.526927661183769e-08	1.4750856514275316e-05	1.325996882745755e-05	47	20.62	47/20.62	ENSAMXG00000020985/ENSAMXG00000031890/ENSAMXG00000036818/ENSAMXG00000005056/ENSAMXG00000040350/ENSAMXG00000040927/ENSAMXG00000013106/ENSAMXG00000009781/ENSAMXG00000016267/ENSAMXG00000008201/ENSAMXG00000042171/ENSAMXG00000029286/ENSAMXG00000040507/ENSAMXG00000010933/ENSAMXG00000002009/ENSAMXG00000018776/ENSAMXG00000043750/ENSAMXG00000001820/ENSAMXG00000007941/ENSAMXG00000013794/ENSAMXG00000042101/…	galnt1/ap3m2/ykt6/fam20b/yipf2/BET1L/prrc1/arcn1b/calua/yif1a/copz2/ubiad1/B4GALT1/b4galt7/gbf1/xylt2/zfpl1/cog3/golga2/adam19b/chpfb/golga5/clint1a/sec23a//copa//slc10a7/sft2d2b/copb2/vps52/copg2/golt1a/gorasp1a/cog7/nav3//vps52/cog2/calub/tmem167b/b4galt5/arcn1a/cltcb/atp7a/b3galt2/emc3
MOLNG-2800	pachon_wild_vs_surface_wild	Down	Cellular Components	GO:0005798	Golgi-associated vesicle	11/559	27/8458	4.696226957857262e-07	5.306736462378706e-05	4.77037790982343e-05	11	1.78	11/1.78	ENSAMXG00000018129/ENSAMXG00000009781/ENSAMXG00000042171/ENSAMXG00000016767/ENSAMXG00000002897/ENSAMXG00000006369/ENSAMXG00000005818/ENSAMXG00000014507/ENSAMXG00000003449/ENSAMXG00000002036/ENSAMXG00000030172	sec24a/arcn1b/copz2/sec24c/sec23a/copa/copb2/copg2/arcn1a/cltcb/emc3
MOLNG-2800	pachon_wild_vs_surface_wild	Down	Cellular Components	GO:0030660	Golgi-associated vesicle membrane	10/559	26/8458	2.965661228405576e-06	0.00022341314587322	0.0002008324972218513	10	1.72	10/1.72	ENSAMXG00000018129/ENSAMXG00000009781/ENSAMXG00000042171/ENSAMXG00000016767/ENSAMXG00000002897/ENSAMXG00000006369/ENSAMXG00000005818/ENSAMXG00000014507/ENSAMXG00000003449/ENSAMXG00000002036	sec24a/arcn1b/copz2/sec24c/sec23a/copa/copb2/copg2/arcn1a/cltcb
MOLNG-2800	pachon_wild_vs_surface_wild	Down	Cellular Components	GO:0030120	vesicle coat	10/559	27/8458	4.4339191887702026e-06	0.00025051643416551647	0.00022519642195596032	10	1.78	10/1.78	ENSAMXG00000018129/ENSAMXG00000009781/ENSAMXG00000042171/ENSAMXG00000016767/ENSAMXG00000002897/ENSAMXG00000010351/ENSAMXG00000006369/ENSAMXG00000014507/ENSAMXG00000003449/ENSAMXG00000002036	sec24a/arcn1b/copz2/sec24c/sec23a/ap2a1/copa/copg2/arcn1a/cltcb
MOLNG-2800	pachon_wild_vs_surface_wild	Down	Cellular Components	GO:0005783	endoplasmic reticulum	44/559	339/8458	1.0559074442834675e-05	0.00046309697271005	0.000416291177145038	44	22.4	44/22.4	ENSAMXG00000032947/ENSAMXG00000042300/ENSAMXG00000037290/ENSAMXG00000037794/ENSAMXG00000038875/ENSAMXG00000009012/ENSAMXG00000015710/ENSAMXG00000016267/ENSAMXG00000008201/ENSAMXG00000034017/ENSAMXG00000001213/ENSAMXG00000006991/ENSAMXG00000016742/ENSAMXG00000001387/ENSAMXG00000034259/ENSAMXG00000010892/ENSAMXG00000041877/ENSAMXG00000015116/ENSAMXG00000021163/ENSAMXG00000002897/ENSAMXG00000039794/…	derl2/hspa13/bscl2l/ero1a/degs1/hspa5/RHBDF2/calua/yif1a/alg11/GPAT4/mogat3b/ptgis/os9/saraf/nck1b/mlec/calr3b/pigb/sec23a/hacd1/ptdss1b/slc10a7/soat1/ptdss2/ebp/agpat2/ext1b/sec31a/cers5/gnpat/syvn1/canx///calub/ptgs2a/ormdl2/ch25hl3/sptssa/ccdc47/pdia8/sqlea/ssr1
MOLNG-2800	pachon_wild_vs_surface_wild	Down	Cellular Components	GO:0030662	coated vesicle membrane	11/559	36/8458	1.2516389849446834e-05	0.00046309697271005	0.000416291177145038	11	2.38	11/2.38	ENSAMXG00000018129/ENSAMXG00000009781/ENSAMXG00000042171/ENSAMXG00000016767/ENSAMXG00000002897/ENSAMXG00000010351/ENSAMXG00000006369/ENSAMXG00000005818/ENSAMXG00000014507/ENSAMXG00000003449/ENSAMXG00000002036	sec24a/arcn1b/copz2/sec24c/sec23a/ap2a1/copa/copb2/copg2/arcn1a/cltcb
MOLNG-2800	pachon_wild_vs_surface_wild	Down	Cellular Components	GO:0005789	endoplasmic reticulum membrane	38/559	282/8458	1.829974700074817e-05	0.00046309697271005	0.000416291177145038	38	18.64	38/18.64	ENSAMXG00000032947/ENSAMXG00000037290/ENSAMXG00000037794/ENSAMXG00000038875/ENSAMXG00000015710/ENSAMXG00000018129/ENSAMXG00000016267/ENSAMXG00000008201/ENSAMXG00000034017/ENSAMXG00000041122/ENSAMXG00000010343/ENSAMXG00000016767/ENSAMXG00000021830/ENSAMXG00000006991/ENSAMXG00000016742/ENSAMXG00000034259/ENSAMXG00000041877/ENSAMXG00000021163/ENSAMXG00000002897/ENSAMXG00000039794/ENSAMXG00000034264/…	derl2/bscl2l/ero1a/degs1/RHBDF2/sec24a/calua/yif1a/alg11/selenos//sec24c/VAPA/mogat3b/ptgis/saraf/mlec/pigb/sec23a/hacd1/ptdss1b/slc10a7/soat1/ptdss2/ebp/ext1b/sec31a/cers5/syvn1//plod3/calub/ptgs2a/ormdl2/sptssa/ccdc47/sqlea/ssr1
MOLNG-2800	pachon_wild_vs_surface_wild	Down	Cellular Components	GO:0030117	membrane coat	13/559	51/8458	1.8441914842435617e-05	0.00046309697271005	0.000416291177145038	13	3.37	13/3.37	ENSAMXG00000031890/ENSAMXG00000018129/ENSAMXG00000009781/ENSAMXG00000042171/ENSAMXG00000016767/ENSAMXG00000002897/ENSAMXG00000010351/ENSAMXG00000006369/ENSAMXG00000005818/ENSAMXG00000014507/ENSAMXG00000031582/ENSAMXG00000003449/ENSAMXG00000002036	ap3m2/sec24a/arcn1b/copz2/sec24c/sec23a/ap2a1/copa/copb2/copg2/ap1s2/arcn1a/cltcb
MOLNG-2800	pachon_wild_vs_surface_wild	Down	Cellular Components	GO:0048475	coated membrane	13/559	51/8458	1.8441914842435617e-05	0.00046309697271005	0.000416291177145038	13	3.37	13/3.37	ENSAMXG00000031890/ENSAMXG00000018129/ENSAMXG00000009781/ENSAMXG00000042171/ENSAMXG00000016767/ENSAMXG00000002897/ENSAMXG00000010351/ENSAMXG00000006369/ENSAMXG00000005818/ENSAMXG00000014507/ENSAMXG00000031582/ENSAMXG00000003449/ENSAMXG00000002036	ap3m2/sec24a/arcn1b/copz2/sec24c/sec23a/ap2a1/copa/copb2/copg2/ap1s2/arcn1a/cltcb
MOLNG-2800	pachon_wild_vs_surface_wild	Down	Cellular Components	GO:0042175	nuclear outer membrane-endoplasmic reticulum membrane network	38/559	288/8458	2.956124329538277e-05	0.0006680840984756506	0.0006005599953693553	38	19.03	38/19.03	ENSAMXG00000032947/ENSAMXG00000037290/ENSAMXG00000037794/ENSAMXG00000038875/ENSAMXG00000015710/ENSAMXG00000018129/ENSAMXG00000016267/ENSAMXG00000008201/ENSAMXG00000034017/ENSAMXG00000041122/ENSAMXG00000010343/ENSAMXG00000016767/ENSAMXG00000021830/ENSAMXG00000006991/ENSAMXG00000016742/ENSAMXG00000034259/ENSAMXG00000041877/ENSAMXG00000021163/ENSAMXG00000002897/ENSAMXG00000039794/ENSAMXG00000034264/…	derl2/bscl2l/ero1a/degs1/RHBDF2/sec24a/calua/yif1a/alg11/selenos//sec24c/VAPA/mogat3b/ptgis/saraf/mlec/pigb/sec23a/hacd1/ptdss1b/slc10a7/soat1/ptdss2/ebp/ext1b/sec31a/cers5/syvn1//plod3/calub/ptgs2a/ormdl2/sptssa/ccdc47/sqlea/ssr1
MOLNG-2800	pachon_wild_vs_surface_wild	Down	Cellular Components	GO:0030135	coated vesicle	12/559	51/8458	9.046719894371484e-05	0.0018586897237526	0.0016708296072858	12	3.37	12/3.37	ENSAMXG00000018129/ENSAMXG00000009781/ENSAMXG00000042171/ENSAMXG00000016767/ENSAMXG00000002897/ENSAMXG00000010351/ENSAMXG00000006369/ENSAMXG00000005818/ENSAMXG00000014507/ENSAMXG00000003449/ENSAMXG00000002036/ENSAMXG00000030172	sec24a/arcn1b/copz2/sec24c/sec23a/ap2a1/copa/copb2/copg2/arcn1a/cltcb/emc3
MOLNG-2800	pachon_wild_vs_surface_wild	Down	Cellular Components	GO:0000139	Golgi membrane	24/559	163/8458	0.0001657238930897781	0.0031211333198574	0.0028056764356427	24	10.77	24/10.77	ENSAMXG00000020985/ENSAMXG00000040927/ENSAMXG00000009781/ENSAMXG00000008201/ENSAMXG00000042171/ENSAMXG00000029286/ENSAMXG00000040507/ENSAMXG00000010933/ENSAMXG00000018776/ENSAMXG00000042101/ENSAMXG00000019132/ENSAMXG00000002897/ENSAMXG00000006369/ENSAMXG00000035563/ENSAMXG00000005388/ENSAMXG00000030882/ENSAMXG00000005818/ENSAMXG00000014507/ENSAMXG00000043507/ENSAMXG00000011966/ENSAMXG00000042007/…	galnt1/BET1L/arcn1b/yif1a/copz2/ubiad1/B4GALT1/b4galt7/xylt2/chpfb/golga5/sec23a/copa//slc10a7/sft2d2b/copb2/copg2/golt1a/cog7/tmem167b/b4galt5/arcn1a/b3galt2
MOLNG-2800	pachon_wild_vs_surface_wild	Down	Cellular Components	GO:0012506	vesicle membrane	14/559	76/8458	0.00039035374999925776	0.0063014248214165	0.0056645318608914	14	5.02	14/5.02	ENSAMXG00000005704/ENSAMXG00000031890/ENSAMXG00000018129/ENSAMXG00000009781/ENSAMXG00000042171/ENSAMXG00000016767/ENSAMXG00000008941/ENSAMXG00000002897/ENSAMXG00000010351/ENSAMXG00000006369/ENSAMXG00000005818/ENSAMXG00000014507/ENSAMXG00000003449/ENSAMXG00000002036	ptprna/ap3m2/sec24a/arcn1b/copz2/sec24c/myof/sec23a/ap2a1/copa/copb2/copg2/arcn1a/cltcb
MOLNG-2800	pachon_wild_vs_surface_wild	Down	Cellular Components	GO:0030659	cytoplasmic vesicle membrane	14/559	76/8458	0.00039035374999925776	0.0063014248214165	0.0056645318608914	14	5.02	14/5.02	ENSAMXG00000005704/ENSAMXG00000031890/ENSAMXG00000018129/ENSAMXG00000009781/ENSAMXG00000042171/ENSAMXG00000016767/ENSAMXG00000008941/ENSAMXG00000002897/ENSAMXG00000010351/ENSAMXG00000006369/ENSAMXG00000005818/ENSAMXG00000014507/ENSAMXG00000003449/ENSAMXG00000002036	ptprna/ap3m2/sec24a/arcn1b/copz2/sec24c/myof/sec23a/ap2a1/copa/copb2/copg2/arcn1a/cltcb
MOLNG-2800	pachon_wild_vs_surface_wild	Down	Cellular Components	GO:0005730	nucleolus	16/559	95/8458	0.0004440541175830509	0.0066904153715846	0.0060142066451599	16	6.28	16/6.28	ENSAMXG00000004967/ENSAMXG00000011236/ENSAMXG00000030585/ENSAMXG00000003899/ENSAMXG00000003634/ENSAMXG00000043121/ENSAMXG00000001647/ENSAMXG00000020989/ENSAMXG00000043918/ENSAMXG00000040120/ENSAMXG00000035201/ENSAMXG00000012949/ENSAMXG00000018885/ENSAMXG00000005458/ENSAMXG00000040261/ENSAMXG00000041217	noc3l/bms1/rps19bp1/mrto4/nip7/bxdc2/ncl/utp23/abt1/mybbp1a/rpf2//ebna1bp2/pdcd11/heatr1/rpf1
MOLNG-2800	pachon_wild_vs_surface_wild	Down	Cellular Components	GO:0098797	plasma membrane protein complex	16/559	105/8458	0.0013633538009774	0.019257372438807	0.0173110054992536	16	6.94	16/6.94	ENSAMXG00000000805/ENSAMXG00000000110/ENSAMXG00000012950/ENSAMXG00000011344/ENSAMXG00000036530/ENSAMXG00000032608/ENSAMXG00000007179/ENSAMXG00000019542/ENSAMXG00000042800/ENSAMXG00000020659/ENSAMXG00000009027/ENSAMXG00000010351/ENSAMXG00000001361/ENSAMXG00000006182/ENSAMXG00000002036/ENSAMXG00000009003	chrna2a/itgav/c9//si:dkey-44g17.6//ncf2//ncf4/ctnna1/c7b/ap2a1/itgb3b/itgb2/cltcb/c6
MOLNG-2800	pachon_wild_vs_surface_wild	Down	Cellular Components	GO:0005829	cytosol	19/559	144/8458	0.0028799406337791	0.0382862696020053	0.0344166280073918	19	9.52	19/9.52	ENSAMXG00000003563/ENSAMXG00000018129/ENSAMXG00000000394/ENSAMXG00000021373/ENSAMXG00000032746/ENSAMXG00000016767/ENSAMXG00000021634/ENSAMXG00000010892/ENSAMXG00000010606/ENSAMXG00000020659/ENSAMXG00000002897/ENSAMXG00000003562/ENSAMXG00000002101/ENSAMXG00000024777/ENSAMXG00000042840/ENSAMXG00000013761/ENSAMXG00000009721/ENSAMXG00000037474/ENSAMXG00000012862	mvda/sec24a/aclya/aclyb/gak/sec24c/rad23ab/nck1b/dnajc6/ctnna1/sec23a/rad23aa/dop1b/eno1a/phpt1/clns1a/hspa14/aacs/prmt7
MOLNG-2800	pachon_wild_vs_surface_wild	Down	Cellular Components	GO:0098796	membrane protein complex	34/559	329/8458	0.0059813120906801	0.0712793450618234	0.0640750516857565	34	21.74	34/21.74	ENSAMXG00000000805/ENSAMXG00000000110/ENSAMXG00000012950/ENSAMXG00000009714/ENSAMXG00000011344/ENSAMXG00000031890/ENSAMXG00000018129/ENSAMXG00000036530/ENSAMXG00000032608/ENSAMXG00000009781/ENSAMXG00000018451/ENSAMXG00000042171/ENSAMXG00000016767/ENSAMXG00000007179/ENSAMXG00000019542/ENSAMXG00000039951/ENSAMXG00000042800/ENSAMXG00000020659/ENSAMXG00000002897/ENSAMXG00000009027/ENSAMXG00000010351/…	chrna2a/itgav/c9/pik3r5//ap3m2/sec24a/si:dkey-44g17.6//arcn1b/vac14/copz2/sec24c/ncf2//atp6v0a2b/ncf4/ctnna1/sec23a/c7b/ap2a1/copa/copb2/itgb3b/copg2/syvn1/itgb2/cox6b1/ap1s2/clic1/arcn1a/cltcb/ttyh3a/c6
MOLNG-2800	pachon_wild_vs_surface_wild	Down	Cellular Components	GO:0005887	integral component of plasma membrane	17/559	132/8458	0.0059925113105072	0.0712793450618234	0.0640750516857565	17	8.72	17/8.72	ENSAMXG00000000805/ENSAMXG00000000110/ENSAMXG00000012950/ENSAMXG00000034740/ENSAMXG00000016896/ENSAMXG00000032608/ENSAMXG00000020980/ENSAMXG00000007179/ENSAMXG00000019542/ENSAMXG00000042800/ENSAMXG00000017050/ENSAMXG00000009027/ENSAMXG00000001361/ENSAMXG00000006182/ENSAMXG00000007223/ENSAMXG00000000023/ENSAMXG00000009003	chrna2a/itgav/c9/drd4a/zgc:91890///ncf2//ncf4/tmc4/c7b/itgb3b/itgb2/slc29a2/slc16a1b/c6
MOLNG-2800	pachon_wild_vs_surface_wild	Down	Cellular Components	GO:0031226	intrinsic component of plasma membrane	17/559	138/8458	0.009287720360588	0.1049512400746445	0.0943436857680782	17	9.12	17/9.12	ENSAMXG00000000805/ENSAMXG00000000110/ENSAMXG00000012950/ENSAMXG00000034740/ENSAMXG00000016896/ENSAMXG00000032608/ENSAMXG00000020980/ENSAMXG00000007179/ENSAMXG00000019542/ENSAMXG00000042800/ENSAMXG00000017050/ENSAMXG00000009027/ENSAMXG00000001361/ENSAMXG00000006182/ENSAMXG00000007223/ENSAMXG00000000023/ENSAMXG00000009003	chrna2a/itgav/c9/drd4a/zgc:91890///ncf2//ncf4/tmc4/c7b/itgb3b/itgb2/slc29a2/slc16a1b/c6
MOLNG-2800	pachon_wild_vs_surface_wild	Down	Cellular Components	GO:0098588	bounding membrane of organelle	39/559	409/8458	0.012534855797624	0.1348989242982393	0.1212645197464377	39	27.03	39/27.03	ENSAMXG00000005704/ENSAMXG00000020985/ENSAMXG00000042295/ENSAMXG00000007201/ENSAMXG00000040350/ENSAMXG00000018129/ENSAMXG00000040927/ENSAMXG00000009781/ENSAMXG00000008201/ENSAMXG00000018451/ENSAMXG00000012597/ENSAMXG00000042171/ENSAMXG00000016767/ENSAMXG00000029286/ENSAMXG00000040507/ENSAMXG00000010933/ENSAMXG00000018776/ENSAMXG00000042101/ENSAMXG00000019132/ENSAMXG00000002897/ENSAMXG00000010351/…	ptprna/galnt1/cisd2/rhot2/yipf2/sec24a/BET1L/arcn1b/yif1a/vac14/slc9a7/copz2/sec24c/ubiad1/B4GALT1/b4galt7/xylt2/chpfb/golga5/sec23a/ap2a1/copa//slc10a7/sft2d2b/copb2/copg2/golt1a/cog7//pip4p1a/tmem167b/ccdc47/b4galt5/arcn1a/fis1/cltcb/b3galt2/ehd1a
MOLNG-2800	pachon_wild_vs_surface_wild	Down	Cellular Components	GO:0005788	endoplasmic reticulum lumen	5/559	24/8458	0.0184321453853433	0.1893484025948903	0.1702107205440793	5	1.59	5/1.59	ENSAMXG00000009012/ENSAMXG00000016267/ENSAMXG00000015116/ENSAMXG00000004026/ENSAMXG00000011486	hspa5/calua/calr3b/calub/pdia8
MOLNG-2800	pachon_wild_vs_surface_wild	Down	Cellular Components	GO:0098802	plasma membrane signaling receptor complex	6/559	33/8458	0.0194515971173947	0.1911330847187483	0.1718150225930062	6	2.18	6/2.18	ENSAMXG00000000805/ENSAMXG00000000110/ENSAMXG00000032608/ENSAMXG00000019542/ENSAMXG00000001361/ENSAMXG00000006182	chrna2a/itgav///itgb3b/itgb2
MOLNG-2800	pachon_wild_vs_surface_wild	Down	Cellular Components	GO:0012507	ER to Golgi transport vesicle membrane	3/559	10/8458	0.0242827423712965	0.2065903622342095	0.1857100135593965	3	0.66	3/0.66	ENSAMXG00000018129/ENSAMXG00000016767/ENSAMXG00000002897	sec24a/sec24c/sec23a
MOLNG-2800	pachon_wild_vs_surface_wild	Down	Cellular Components	GO:0030134	COPII-coated ER to Golgi transport vesicle	3/559	10/8458	0.0242827423712965	0.2065903622342095	0.1857100135593965	3	0.66	3/0.66	ENSAMXG00000018129/ENSAMXG00000016767/ENSAMXG00000002897	sec24a/sec24c/sec23a
MOLNG-2800	pachon_wild_vs_surface_wild	Down	Cellular Components	GO:0030684	preribosome	3/559	10/8458	0.0242827423712965	0.2065903622342095	0.1857100135593965	3	0.66	3/0.66	ENSAMXG00000006658/ENSAMXG00000020989/ENSAMXG00000043138	UTP14C/utp23/
MOLNG-2800	pachon_wild_vs_surface_wild	Down	Cellular Components	GO:0008305	integrin complex	5/559	26/8458	0.0255952661175126	0.2065903622342095	0.1857100135593965	5	1.72	5/1.72	ENSAMXG00000000110/ENSAMXG00000032608/ENSAMXG00000019542/ENSAMXG00000001361/ENSAMXG00000006182	itgav///itgb3b/itgb2
MOLNG-2800	pachon_wild_vs_surface_wild	Down	Cellular Components	GO:0098636	protein complex involved in cell adhesion	5/559	26/8458	0.0255952661175126	0.2065903622342095	0.1857100135593965	5	1.72	5/1.72	ENSAMXG00000000110/ENSAMXG00000032608/ENSAMXG00000019542/ENSAMXG00000001361/ENSAMXG00000006182	itgav///itgb3b/itgb2
MOLNG-2800	pachon_wild_vs_surface_wild	Down	Cellular Components	GO:0043235	receptor complex	6/559	36/8458	0.0289628152086768	0.225710215074516	0.202897398739551	6	2.38	6/2.38	ENSAMXG00000000805/ENSAMXG00000000110/ENSAMXG00000032608/ENSAMXG00000019542/ENSAMXG00000001361/ENSAMXG00000006182	chrna2a/itgav///itgb3b/itgb2
MOLNG-2800	pachon_wild_vs_surface_wild	Down	Cellular Components	GO:0000932	P-body	3/559	11/8458	0.0317822274957878	0.2394261138016014	0.2152270142697209	3	0.73	3/0.73	ENSAMXG00000002198/ENSAMXG00000009571/ENSAMXG00000001589	ago3a/ago3b/edc3
MOLNG-2800	pachon_wild_vs_surface_wild	Down	Cellular Components	GO:0030658	transport vesicle membrane	5/559	28/8458	0.0343280109890979	0.2502622736624558	0.2249679497757521	5	1.85	5/1.85	ENSAMXG00000005704/ENSAMXG00000018129/ENSAMXG00000016767/ENSAMXG00000002897/ENSAMXG00000002036	ptprna/sec24a/sec24c/sec23a/cltcb
MOLNG-2800	pachon_wild_vs_surface_wild	Down	Cellular Components	GO:0015629	actin cytoskeleton	11/559	92/8458	0.0394337942570117	0.2785011719401451	0.2503527069606335	11	6.08	11/6.08	ENSAMXG00000010006/ENSAMXG00000010563/ENSAMXG00000042945/ENSAMXG00000009861/ENSAMXG00000020659/ENSAMXG00000012478/ENSAMXG00000016522/ENSAMXG00000042904/ENSAMXG00000017476/ENSAMXG00000009997/ENSAMXG00000017247	myh9a/tnnt1/capza1a//ctnna1/myo1ea/myo1f/vclb/myo1g/arpc1a/myo5ab
MOLNG-2800	pachon_wild_vs_surface_wild	Down	Cellular Components	GO:0016459	myosin complex	6/559	40/8458	0.0457767539938478	0.3135014061396849	0.2818154233114076	6	2.64	6/2.64	ENSAMXG00000010006/ENSAMXG00000009861/ENSAMXG00000012478/ENSAMXG00000016522/ENSAMXG00000017476/ENSAMXG00000017247	myh9a//myo1ea/myo1f/myo1g/myo5ab
MOLNG-2800	pachon_wild_vs_surface_wild	Down	Molecular Functions	GO:0001883	purine nucleoside binding	51/696	403/11006	1.3841569635033865e-06	0.00012211736405106648	0.00011582063648979052	51	25.49	51/25.49	ENSAMXG00000025294/ENSAMXG00000037759/ENSAMXG00000033091/ENSAMXG00000039761/ENSAMXG00000019845/ENSAMXG00000031410/ENSAMXG00000003155/ENSAMXG00000002853/ENSAMXG00000007201/ENSAMXG00000030683/ENSAMXG00000039933/ENSAMXG00000038224/ENSAMXG00000026465/ENSAMXG00000009074/ENSAMXG00000021056/ENSAMXG00000032564/ENSAMXG00000020331/ENSAMXG00000031467/ENSAMXG00000042278/ENSAMXG00000032669/ENSAMXG00000038268/…	//rac1b//arf1//rab11a/rab8a/rhot2/arl8ba//ARF5//RABL6/arl1/rab1ab//arf4a//srp54/tuba1b/arl9/rab11al/eif5b//atl3/rab1ba/bms1/rab6ba/cplane2/rabl2/ARF5/rab18b/zgc:55461///rab5ab/dnajc27/RAB10//rrad///drg2//rab41/rap1b/ralba//rab4b/ehd1a
MOLNG-2800	pachon_wild_vs_surface_wild	Down	Molecular Functions	GO:0005525	GTP binding	51/696	403/11006	1.3841569635033865e-06	0.00012211736405106648	0.00011582063648979052	51	25.49	51/25.49	ENSAMXG00000025294/ENSAMXG00000037759/ENSAMXG00000033091/ENSAMXG00000039761/ENSAMXG00000019845/ENSAMXG00000031410/ENSAMXG00000003155/ENSAMXG00000002853/ENSAMXG00000007201/ENSAMXG00000030683/ENSAMXG00000039933/ENSAMXG00000038224/ENSAMXG00000026465/ENSAMXG00000009074/ENSAMXG00000021056/ENSAMXG00000032564/ENSAMXG00000020331/ENSAMXG00000031467/ENSAMXG00000042278/ENSAMXG00000032669/ENSAMXG00000038268/…	//rac1b//arf1//rab11a/rab8a/rhot2/arl8ba//ARF5//RABL6/arl1/rab1ab//arf4a//srp54/tuba1b/arl9/rab11al/eif5b//atl3/rab1ba/bms1/rab6ba/cplane2/rabl2/ARF5/rab18b/zgc:55461///rab5ab/dnajc27/RAB10//rrad///drg2//rab41/rap1b/ralba//rab4b/ehd1a
MOLNG-2800	pachon_wild_vs_surface_wild	Down	Molecular Functions	GO:0032550	purine ribonucleoside binding	51/696	403/11006	1.3841569635033865e-06	0.00012211736405106648	0.00011582063648979052	51	25.49	51/25.49	ENSAMXG00000025294/ENSAMXG00000037759/ENSAMXG00000033091/ENSAMXG00000039761/ENSAMXG00000019845/ENSAMXG00000031410/ENSAMXG00000003155/ENSAMXG00000002853/ENSAMXG00000007201/ENSAMXG00000030683/ENSAMXG00000039933/ENSAMXG00000038224/ENSAMXG00000026465/ENSAMXG00000009074/ENSAMXG00000021056/ENSAMXG00000032564/ENSAMXG00000020331/ENSAMXG00000031467/ENSAMXG00000042278/ENSAMXG00000032669/ENSAMXG00000038268/…	//rac1b//arf1//rab11a/rab8a/rhot2/arl8ba//ARF5//RABL6/arl1/rab1ab//arf4a//srp54/tuba1b/arl9/rab11al/eif5b//atl3/rab1ba/bms1/rab6ba/cplane2/rabl2/ARF5/rab18b/zgc:55461///rab5ab/dnajc27/RAB10//rrad///drg2//rab41/rap1b/ralba//rab4b/ehd1a
MOLNG-2800	pachon_wild_vs_surface_wild	Down	Molecular Functions	GO:0001882	nucleoside binding	51/696	406/11006	1.728233158324201e-06	0.00012211736405106648	0.00011582063648979052	51	25.67	51/25.67	ENSAMXG00000025294/ENSAMXG00000037759/ENSAMXG00000033091/ENSAMXG00000039761/ENSAMXG00000019845/ENSAMXG00000031410/ENSAMXG00000003155/ENSAMXG00000002853/ENSAMXG00000007201/ENSAMXG00000030683/ENSAMXG00000039933/ENSAMXG00000038224/ENSAMXG00000026465/ENSAMXG00000009074/ENSAMXG00000021056/ENSAMXG00000032564/ENSAMXG00000020331/ENSAMXG00000031467/ENSAMXG00000042278/ENSAMXG00000032669/ENSAMXG00000038268/…	//rac1b//arf1//rab11a/rab8a/rhot2/arl8ba//ARF5//RABL6/arl1/rab1ab//arf4a//srp54/tuba1b/arl9/rab11al/eif5b//atl3/rab1ba/bms1/rab6ba/cplane2/rabl2/ARF5/rab18b/zgc:55461///rab5ab/dnajc27/RAB10//rrad///drg2//rab41/rap1b/ralba//rab4b/ehd1a
MOLNG-2800	pachon_wild_vs_surface_wild	Down	Molecular Functions	GO:0032549	ribonucleoside binding	51/696	406/11006	1.728233158324201e-06	0.00012211736405106648	0.00011582063648979052	51	25.67	51/25.67	ENSAMXG00000025294/ENSAMXG00000037759/ENSAMXG00000033091/ENSAMXG00000039761/ENSAMXG00000019845/ENSAMXG00000031410/ENSAMXG00000003155/ENSAMXG00000002853/ENSAMXG00000007201/ENSAMXG00000030683/ENSAMXG00000039933/ENSAMXG00000038224/ENSAMXG00000026465/ENSAMXG00000009074/ENSAMXG00000021056/ENSAMXG00000032564/ENSAMXG00000020331/ENSAMXG00000031467/ENSAMXG00000042278/ENSAMXG00000032669/ENSAMXG00000038268/…	//rac1b//arf1//rab11a/rab8a/rhot2/arl8ba//ARF5//RABL6/arl1/rab1ab//arf4a//srp54/tuba1b/arl9/rab11al/eif5b//atl3/rab1ba/bms1/rab6ba/cplane2/rabl2/ARF5/rab18b/zgc:55461///rab5ab/dnajc27/RAB10//rrad///drg2//rab41/rap1b/ralba//rab4b/ehd1a
MOLNG-2800	pachon_wild_vs_surface_wild	Down	Molecular Functions	GO:0032561	guanyl ribonucleotide binding	51/696	407/11006	1.8596552901177636e-06	0.00012211736405106648	0.00011582063648979052	51	25.74	51/25.74	ENSAMXG00000025294/ENSAMXG00000037759/ENSAMXG00000033091/ENSAMXG00000039761/ENSAMXG00000019845/ENSAMXG00000031410/ENSAMXG00000003155/ENSAMXG00000002853/ENSAMXG00000007201/ENSAMXG00000030683/ENSAMXG00000039933/ENSAMXG00000038224/ENSAMXG00000026465/ENSAMXG00000009074/ENSAMXG00000021056/ENSAMXG00000032564/ENSAMXG00000020331/ENSAMXG00000031467/ENSAMXG00000042278/ENSAMXG00000032669/ENSAMXG00000038268/…	//rac1b//arf1//rab11a/rab8a/rhot2/arl8ba//ARF5//RABL6/arl1/rab1ab//arf4a//srp54/tuba1b/arl9/rab11al/eif5b//atl3/rab1ba/bms1/rab6ba/cplane2/rabl2/ARF5/rab18b/zgc:55461///rab5ab/dnajc27/RAB10//rrad///drg2//rab41/rap1b/ralba//rab4b/ehd1a
MOLNG-2800	pachon_wild_vs_surface_wild	Down	Molecular Functions	GO:0019001	guanyl nucleotide binding	51/696	414/11006	3.0761086224155283e-06	0.0001731409710331026	0.00016421331743721992	51	26.18	51/26.18	ENSAMXG00000025294/ENSAMXG00000037759/ENSAMXG00000033091/ENSAMXG00000039761/ENSAMXG00000019845/ENSAMXG00000031410/ENSAMXG00000003155/ENSAMXG00000002853/ENSAMXG00000007201/ENSAMXG00000030683/ENSAMXG00000039933/ENSAMXG00000038224/ENSAMXG00000026465/ENSAMXG00000009074/ENSAMXG00000021056/ENSAMXG00000032564/ENSAMXG00000020331/ENSAMXG00000031467/ENSAMXG00000042278/ENSAMXG00000032669/ENSAMXG00000038268/…	//rac1b//arf1//rab11a/rab8a/rhot2/arl8ba//ARF5//RABL6/arl1/rab1ab//arf4a//srp54/tuba1b/arl9/rab11al/eif5b//atl3/rab1ba/bms1/rab6ba/cplane2/rabl2/ARF5/rab18b/zgc:55461///rab5ab/dnajc27/RAB10//rrad///drg2//rab41/rap1b/ralba//rab4b/ehd1a
MOLNG-2800	pachon_wild_vs_surface_wild	Down	Molecular Functions	GO:0016877	ligase activity, forming carbon-sulfur bonds	8/696	23/11006	5.1407206480855096e-05	0.0025318049191821	0.0024012576711452	8	1.45	8/1.45	ENSAMXG00000035806/ENSAMXG00000006543/ENSAMXG00000002359/ENSAMXG00000014881/ENSAMXG00000034395/ENSAMXG00000037474/ENSAMXG00000015276/ENSAMXG00000000632	UBA6/slc27a4/acss1/slc27a6//aacs/uba1/
MOLNG-2800	pachon_wild_vs_surface_wild	Down	Molecular Functions	GO:0016405	CoA-ligase activity	5/696	11/11006	0.0003342994199622821	0.0146348857183487	0.0138802683142234	5	0.7	5/0.7	ENSAMXG00000006543/ENSAMXG00000002359/ENSAMXG00000014881/ENSAMXG00000037474/ENSAMXG00000000632	slc27a4/acss1/slc27a6/aacs/
MOLNG-2800	pachon_wild_vs_surface_wild	Down	Molecular Functions	GO:0016878	acid-thiol ligase activity	5/696	12/11006	0.0005433656129019385	0.0214086051483363	0.0203047150084408	5	0.76	5/0.76	ENSAMXG00000006543/ENSAMXG00000002359/ENSAMXG00000014881/ENSAMXG00000037474/ENSAMXG00000000632	slc27a4/acss1/slc27a6/aacs/
MOLNG-2800	pachon_wild_vs_surface_wild	Down	Molecular Functions	GO:0003779	actin binding	28/696	234/11006	0.0008300175849945349	0.0272522440406538	0.0258470388309701	28	14.8	28/14.8	ENSAMXG00000029398/ENSAMXG00000017009/ENSAMXG00000042220/ENSAMXG00000006250/ENSAMXG00000010006/ENSAMXG00000011348/ENSAMXG00000042945/ENSAMXG00000041084/ENSAMXG00000013411/ENSAMXG00000021578/ENSAMXG00000015787/ENSAMXG00000039868/ENSAMXG00000020659/ENSAMXG00000012478/ENSAMXG00000015567/ENSAMXG00000020631/ENSAMXG00000019571/ENSAMXG00000016522/ENSAMXG00000042904/ENSAMXG00000017476/ENSAMXG00000040254/…	/ush1c/lsp1a/svild/myh9a/msna/capza1a/cotl1/flna/lsp1b/ppp1r9ba/actn1/ctnna1/myo1ea/flnca/cap1/MTSS1/myo1f/vclb/myo1g/pfn1/lima1a/nav3/cap2/pfn2/arpc1a/wasf2/myo5ab
MOLNG-2800	pachon_wild_vs_surface_wild	Down	Molecular Functions	GO:0003924	GTPase activity	28/696	234/11006	0.0008300175849945349	0.0272522440406538	0.0258470388309701	28	14.8	28/14.8	ENSAMXG00000033091/ENSAMXG00000039761/ENSAMXG00000003155/ENSAMXG00000002853/ENSAMXG00000007201/ENSAMXG00000030683/ENSAMXG00000032564/ENSAMXG00000020331/ENSAMXG00000032669/ENSAMXG00000038268/ENSAMXG00000024632/ENSAMXG00000018383/ENSAMXG00000008241/ENSAMXG00000003547/ENSAMXG00000004630/ENSAMXG00000029647/ENSAMXG00000040611/ENSAMXG00000042073/ENSAMXG00000033008/ENSAMXG00000035919/ENSAMXG00000041488/…	rac1b//rab11a/rab8a/rhot2/arl8ba/rab1ab//srp54/tuba1b/rab11al/eif5b/atl3/rab1ba/rab6ba/cplane2/rabl2/rab18b/zgc:55461/rab5ab/dnajc27/RAB10/rrad//rab41/rap1b/ralba/rab4b
MOLNG-2800	pachon_wild_vs_surface_wild	Down	Molecular Functions	GO:0003724	RNA helicase activity	10/696	53/11006	0.0015647534667782	0.0463695987842499	0.0439786469901381	10	3.35	10/3.35	ENSAMXG00000019947/ENSAMXG00000033980/ENSAMXG00000019357/ENSAMXG00000002100/ENSAMXG00000024269/ENSAMXG00000013396/ENSAMXG00000018751/ENSAMXG00000006135/ENSAMXG00000016919/ENSAMXG00000020882	ddx55//ddx56/ddx1/ddx18/ddx3xb/mtrex/ddx10/ddx49/eif4a3
MOLNG-2800	pachon_wild_vs_surface_wild	Down	Molecular Functions	GO:0008092	cytoskeletal protein binding	37/696	353/11006	0.001647650718222	0.0463695987842499	0.0439786469901381	37	22.32	37/22.32	ENSAMXG00000029398/ENSAMXG00000017009/ENSAMXG00000042220/ENSAMXG00000006250/ENSAMXG00000010006/ENSAMXG00000011348/ENSAMXG00000002528/ENSAMXG00000018489/ENSAMXG00000042945/ENSAMXG00000041084/ENSAMXG00000014373/ENSAMXG00000013411/ENSAMXG00000021578/ENSAMXG00000015787/ENSAMXG00000030503/ENSAMXG00000039868/ENSAMXG00000020659/ENSAMXG00000039342/ENSAMXG00000012478/ENSAMXG00000015567/ENSAMXG00000020631/…	/ush1c/lsp1a/svild/myh9a/msna/kif3b/kif13ba/capza1a/cotl1/HOOK3/flna/lsp1b/ppp1r9ba/tbcc/actn1/ctnna1//myo1ea/flnca/cap1/MTSS1/myo1f/vclb/myo1g/pfn1/tmod2//lima1a/nav3/cap2/mapre1b/pfn2/arpc1a/wasf2/myo5ab/kif5ba
MOLNG-2800	pachon_wild_vs_surface_wild	Down	Molecular Functions	GO:0016874	ligase activity	16/696	113/11006	0.0019282456632786	0.0506485860887862	0.0480369972255386	16	7.15	16/7.15	ENSAMXG00000035806/ENSAMXG00000006543/ENSAMXG00000029843/ENSAMXG00000002359/ENSAMXG00000001913/ENSAMXG00000039240/ENSAMXG00000006079/ENSAMXG00000014881/ENSAMXG00000034395/ENSAMXG00000035139/ENSAMXG00000037912/ENSAMXG00000014553/ENSAMXG00000037474/ENSAMXG00000015276/ENSAMXG00000007489/ENSAMXG00000000632	UBA6/slc27a4/asns/acss1/ctps1b/asns/cars1/slc27a6//asdurf/farsa/qars1/aacs/uba1/lig3/
MOLNG-2800	pachon_wild_vs_surface_wild	Down	Molecular Functions	GO:0004386	helicase activity	15/696	120/11006	0.0085558491885891	0.2106877862690072	0.1998241093387592	15	7.59	15/7.59	ENSAMXG00000010730/ENSAMXG00000015786/ENSAMXG00000019947/ENSAMXG00000033980/ENSAMXG00000019357/ENSAMXG00000002262/ENSAMXG00000002100/ENSAMXG00000042187/ENSAMXG00000021023/ENSAMXG00000024269/ENSAMXG00000013396/ENSAMXG00000018751/ENSAMXG00000006135/ENSAMXG00000016919/ENSAMXG00000020882	dicer1/mcm6/ddx55//ddx56/ruvbl1/ddx1/upf1/smarca4a/ddx18/ddx3xb/mtrex/ddx10/ddx49/eif4a3
MOLNG-2800	pachon_wild_vs_surface_wild	Down	Molecular Functions	GO:0016887	ATPase activity	25/696	242/11006	0.0104692855707592	0.242641089110538	0.2301298066637483	25	15.3	25/15.3	ENSAMXG00000003503/ENSAMXG00000020078/ENSAMXG00000010730/ENSAMXG00000019554/ENSAMXG00000016432/ENSAMXG00000008937/ENSAMXG00000015786/ENSAMXG00000019947/ENSAMXG00000033980/ENSAMXG00000019357/ENSAMXG00000002262/ENSAMXG00000002100/ENSAMXG00000042187/ENSAMXG00000002914/ENSAMXG00000021023/ENSAMXG00000024269/ENSAMXG00000013396/ENSAMXG00000018751/ENSAMXG00000036596/ENSAMXG00000012316/ENSAMXG00000006135/…	/trip13/dicer1/abcc9/ABCA1/abcf3/mcm6/ddx55//ddx56/ruvbl1/ddx1/upf1/clpxa/smarca4a/ddx18/ddx3xb/mtrex/ATP13A3/yme1l1b/ddx10/abcb7/ddx49/eif4a3/RNF213
MOLNG-2800	pachon_wild_vs_surface_wild	Down	Molecular Functions	GO:0004559	alpha-mannosidase activity	4/696	15/11006	0.012350763157712	0.270344482452142	0.2564047322215079	4	0.95	4/0.95	ENSAMXG00000034933/ENSAMXG00000006789/ENSAMXG00000017945/ENSAMXG00000017128	man1a2/man2a1/man1a1/edem1
MOLNG-2800	pachon_wild_vs_surface_wild	Down	Molecular Functions	GO:0015923	mannosidase activity	4/696	16/11006	0.0156596826479762	0.3247323664896129	0.3079882182842977	4	1.01	4/1.01	ENSAMXG00000034933/ENSAMXG00000006789/ENSAMXG00000017945/ENSAMXG00000017128	man1a2/man2a1/man1a1/edem1
MOLNG-2800	pachon_wild_vs_surface_wild	Down	Molecular Functions	GO:0016765	transferase activity, transferring alkyl or aryl (other than methyl) groups	7/696	43/11006	0.0172408201777194	0.3294678132192057	0.3124794915651029	7	2.72	7/2.72	ENSAMXG00000033230/ENSAMXG00000018589/ENSAMXG00000029286/ENSAMXG00000033139/ENSAMXG00000003484/ENSAMXG00000001697/ENSAMXG00000032738	fdps/mat2aa/ubiad1/fdft1/hmbsa/dhdds/nus1
MOLNG-2800	pachon_wild_vs_surface_wild	Down	Molecular Functions	GO:0030246	carbohydrate binding	12/696	96/11006	0.0175969745205712	0.3294678132192057	0.3124794915651029	12	6.07	12/6.07	ENSAMXG00000034326/ENSAMXG00000020985/ENSAMXG00000017466/ENSAMXG00000003475/ENSAMXG00000040615/ENSAMXG00000007830/ENSAMXG00000006789/ENSAMXG00000041877/ENSAMXG00000007863/ENSAMXG00000032724/ENSAMXG00000016685/ENSAMXG00000009139	/galnt1//hk2///man2a1/mlec///plod3/zgc:171967
MOLNG-2800	pachon_wild_vs_surface_wild	Down	Molecular Functions	GO:0016860	intramolecular oxidoreductase activity	5/696	25/11006	0.0183966799259455	0.3294678132192057	0.3124794915651029	5	1.58	5/1.58	ENSAMXG00000037794/ENSAMXG00000016742/ENSAMXG00000034930/ENSAMXG00000016057/ENSAMXG00000011486	ero1a/ptgis/idi1/ebp/pdia8
MOLNG-2800	pachon_wild_vs_surface_wild	Down	Molecular Functions	GO:0017124	SH3 domain binding	3/696	10/11006	0.0216146227562886	0.3548400569157389	0.3365434683544945	3	0.63	3/0.63	ENSAMXG00000014786/ENSAMXG00000013794/ENSAMXG00000017304	adam10a/adam19b/adam17a
MOLNG-2800	pachon_wild_vs_surface_wild	Down	Molecular Functions	GO:0031593	polyubiquitin modification-dependent protein binding	3/696	10/11006	0.0216146227562886	0.3548400569157389	0.3365434683544945	3	0.63	3/0.63	ENSAMXG00000021634/ENSAMXG00000003562/ENSAMXG00000036716	rad23ab/rad23aa/brcc3
MOLNG-2800	pachon_wild_vs_surface_wild	Down	Molecular Functions	GO:0015291	secondary active transmembrane transporter activity	11/696	89/11006	0.0242274356908163	0.3818243864872657	0.3621364071679918	11	5.63	11/5.63	ENSAMXG00000001313/ENSAMXG00000012597/ENSAMXG00000018133/ENSAMXG00000019783/ENSAMXG00000016183/ENSAMXG00000002330/ENSAMXG00000005388/ENSAMXG00000024355/ENSAMXG00000030076/ENSAMXG00000012451/ENSAMXG00000000023	slc6a16b/slc9a7/slc10a3/slc23a2/tmco3/slc6a22.1/slc10a7/slc47a2.1/slc10a4/letm1/slc16a1b
MOLNG-2800	pachon_wild_vs_surface_wild	Down	Molecular Functions	GO:0004715	non-membrane spanning protein tyrosine kinase activity	6/696	37/11006	0.027140091983432	0.4112767785181619	0.3900701479400147	6	2.34	6/2.34	ENSAMXG00000019372/ENSAMXG00000036151/ENSAMXG00000002336/ENSAMXG00000010587/ENSAMXG00000019793/ENSAMXG00000036960	ptk6b/hck/btk/jak1/tec/syk
MOLNG-2800	pachon_wild_vs_surface_wild	Down	Molecular Functions	GO:0008641	ubiquitin-like modifier activating enzyme activity	3/696	11/11006	0.0283490705294279	0.4136864366146149	0.3923555570349674	3	0.7	3/0.7	ENSAMXG00000035806/ENSAMXG00000034395/ENSAMXG00000015276	UBA6//uba1
MOLNG-2800	pachon_wild_vs_surface_wild	Down	Molecular Functions	GO:0022804	active transmembrane transporter activity	17/696	164/11006	0.0301966184112331	0.4249095590723523	0.4029999825559313	17	10.37	17/10.37	ENSAMXG00000001313/ENSAMXG00000019554/ENSAMXG00000012597/ENSAMXG00000016432/ENSAMXG00000018133/ENSAMXG00000019783/ENSAMXG00000016183/ENSAMXG00000002330/ENSAMXG00000005388/ENSAMXG00000016686/ENSAMXG00000024355/ENSAMXG00000014061/ENSAMXG00000030076/ENSAMXG00000012451/ENSAMXG00000000023/ENSAMXG00000018894/ENSAMXG00000013922	slc6a16b/abcc9/slc9a7/ABCA1/slc10a3/slc23a2/tmco3/slc6a22.1/slc10a7/abca4a/slc47a2.1/tap2a/slc10a4/letm1/slc16a1b/atp7a/abcb7
MOLNG-2800	pachon_wild_vs_surface_wild	Down	Molecular Functions	GO:0016884	carbon-nitrogen ligase activity, with glutamine as amido-N-donor	3/696	12/11006	0.0360612739607623	0.42831731070927	0.4062320205765184	3	0.76	3/0.76	ENSAMXG00000029843/ENSAMXG00000039240/ENSAMXG00000035139	asns/asns/asdurf
MOLNG-2800	pachon_wild_vs_surface_wild	Down	Molecular Functions	GO:0051087	chaperone binding	3/696	12/11006	0.0360612739607623	0.42831731070927	0.4062320205765184	3	0.76	3/0.76	ENSAMXG00000005454/ENSAMXG00000014750/ENSAMXG00000001926	bag4/grpel1/ahsa1b
MOLNG-2800	pachon_wild_vs_surface_wild	Down	Molecular Functions	GO:0015932	nucleobase-containing compound transmembrane transporter activity	7/696	50/11006	0.0366167174539805	0.42831731070927	0.4062320205765184	7	3.16	7/3.16	ENSAMXG00000042010/ENSAMXG00000020980/ENSAMXG00000015817/ENSAMXG00000035355/ENSAMXG00000032526/ENSAMXG00000007223/ENSAMXG00000006680	slc25a19//si:dkey-178e17.1/slc33a1/slc25a25b/slc29a2/slc25a42
MOLNG-2800	pachon_wild_vs_surface_wild	Down	Molecular Functions	GO:1901505	carbohydrate derivative transmembrane transporter activity	7/696	50/11006	0.0366167174539805	0.42831731070927	0.4062320205765184	7	3.16	7/3.16	ENSAMXG00000042010/ENSAMXG00000020980/ENSAMXG00000015817/ENSAMXG00000035355/ENSAMXG00000032526/ENSAMXG00000007223/ENSAMXG00000006680	slc25a19//si:dkey-178e17.1/slc33a1/slc25a25b/slc29a2/slc25a42
MOLNG-2800	pachon_wild_vs_surface_wild	Down	Molecular Functions	GO:0051015	actin filament binding	8/696	61/11006	0.0372847065199342	0.42831731070927	0.4062320205765184	8	3.86	8/3.86	ENSAMXG00000017009/ENSAMXG00000006250/ENSAMXG00000010006/ENSAMXG00000039868/ENSAMXG00000020659/ENSAMXG00000042904/ENSAMXG00000004876/ENSAMXG00000017247	ush1c/svild/myh9a/actn1/ctnna1/vclb/lima1a/myo5ab
MOLNG-2800	pachon_wild_vs_surface_wild	Down	Molecular Functions	GO:0008514	organic anion transmembrane transporter activity	9/696	73/11006	0.0398577752380975	0.42831731070927	0.4062320205765184	9	4.62	9/4.62	ENSAMXG00000042010/ENSAMXG00000016896/ENSAMXG00000015817/ENSAMXG00000035355/ENSAMXG00000019783/ENSAMXG00000032526/ENSAMXG00000000023/ENSAMXG00000000632/ENSAMXG00000006680	slc25a19/zgc:91890/si:dkey-178e17.1/slc33a1/slc23a2/slc25a25b/slc16a1b//slc25a42
MOLNG-2800	pachon_wild_vs_surface_wild	Down	Molecular Functions	GO:0050661	NADP binding	4/696	21/11006	0.040121260722907	0.42831731070927	0.4062320205765184	4	1.33	4/1.33	ENSAMXG00000040266/ENSAMXG00000016577/ENSAMXG00000016984/ENSAMXG00000017509	pgd/gapdhs/h6pd/g6pd
MOLNG-2800	pachon_wild_vs_surface_wild	Down	Molecular Functions	GO:0050839	cell adhesion molecule binding	4/696	21/11006	0.040121260722907	0.42831731070927	0.4062320205765184	4	1.33	4/1.33	ENSAMXG00000005593/ENSAMXG00000020659/ENSAMXG00000001361/ENSAMXG00000019492	fn1a/ctnna1/itgb3b/nectin1b
MOLNG-2800	pachon_wild_vs_surface_wild	Down	Molecular Functions	GO:0015293	symporter activity	7/696	51/11006	0.0402226916148299	0.42831731070927	0.4062320205765184	7	3.23	7/3.23	ENSAMXG00000001313/ENSAMXG00000018133/ENSAMXG00000019783/ENSAMXG00000002330/ENSAMXG00000005388/ENSAMXG00000030076/ENSAMXG00000000023	slc6a16b/slc10a3/slc23a2/slc6a22.1/slc10a7/slc10a4/slc16a1b
MOLNG-2800	pachon_wild_vs_surface_wild	Down	Molecular Functions	GO:0003774	motor activity	10/696	86/11006	0.0442734918197313	0.45191352761677	0.4286115476995815	10	5.44	10/5.44	ENSAMXG00000010006/ENSAMXG00000002528/ENSAMXG00000018489/ENSAMXG00000009861/ENSAMXG00000012478/ENSAMXG00000016522/ENSAMXG00000017476/ENSAMXG00000017247/ENSAMXG00000005869/ENSAMXG00000034651	myh9a/kif3b/kif13ba//myo1ea/myo1f/myo1g/myo5ab/kif5ba/dynll2b
MOLNG-2800	pachon_wild_vs_surface_wild	Down	Molecular Functions	GO:0140142	nucleocytoplasmic carrier activity	3/696	13/11006	0.0447325573021675	0.45191352761677	0.4286115476995815	3	0.82	3/0.82	ENSAMXG00000003069/ENSAMXG00000011854/ENSAMXG00000014246	xpo1a/kpna6/kpna4
MOLNG-2800	pachon_wild_vs_surface_wild	Down	Biological Process	GO:0008610	lipid biosynthetic process	30/585	145/9643	2.0846210058490327e-09	2.8934539561184573e-06	2.8219185405493224e-06	30	8.8	30/8.8	ENSAMXG00000039120/ENSAMXG00000029262/ENSAMXG00000033230/ENSAMXG00000025872/ENSAMXG00000008399/ENSAMXG00000003563/ENSAMXG00000038875/ENSAMXG00000040310/ENSAMXG00000031770/ENSAMXG00000029724/ENSAMXG00000018451/ENSAMXG00000013963/ENSAMXG00000016742/ENSAMXG00000040618/ENSAMXG00000033139/ENSAMXG00000021163/ENSAMXG00000039794/ENSAMXG00000034930/ENSAMXG00000034264/ENSAMXG00000013424/ENSAMXG00000030286/…	hmgcs1/hsd17b7/fdps/ch25h/rcor1/mvda/degs1/msmo1/ISYNA1/sc5d/vac14/pcyt1ab/ptgis/gal3st1a/fdft1/pigb/hacd1/idi1/ptdss1b/ptdss2/agpat2/lss/cds2/pcyt1bb/ptgs2a/nsdhl/ormdl2/nus1/sqlea/
MOLNG-2800	pachon_wild_vs_surface_wild	Down	Biological Process	GO:0006629	lipid metabolic process	55/585	431/9643	9.25726930510004e-08	6.424544897739428e-05	6.265709645451922e-05	55	26.15	55/26.15	ENSAMXG00000031383/ENSAMXG00000006543/ENSAMXG00000032958/ENSAMXG00000039120/ENSAMXG00000029262/ENSAMXG00000033230/ENSAMXG00000025872/ENSAMXG00000008399/ENSAMXG00000037290/ENSAMXG00000003563/ENSAMXG00000009714/ENSAMXG00000038875/ENSAMXG00000035728/ENSAMXG00000040310/ENSAMXG00000031770/ENSAMXG00000029313/ENSAMXG00000000394/ENSAMXG00000021373/ENSAMXG00000029724/ENSAMXG00000004967/ENSAMXG00000042587/…	inpp5ka/slc27a4/PLPP1/hmgcs1/hsd17b7/fdps/ch25h/rcor1/bscl2l/mvda/pik3r5/degs1/acot19/msmo1/ISYNA1/BPNT2/aclya/aclyb/sc5d/noc3l/enpp6/vac14/plcd3a/vldlr/pcyt1ab/ptgis/gal3st1a/fdft1/pigb/hacd1/idi1/ptdss1b/slc27a6/ptdss2/ebp/agpat2/cers5/gnpat/pip4p1a/lss/cds2/pcyt1bb/ptgs2a/nsdhl/ormdl2/ch25hl3/sptssa/pik3ca/aacs/sgms2b/nus1/serinc5/sqlea//smpdl3b
MOLNG-2800	pachon_wild_vs_surface_wild	Down	Biological Process	GO:0044255	cellular lipid metabolic process	39/585	307/9643	8.225682495955679e-06	0.0038057491014621	0.0037116588385259	39	18.62	39/18.62	ENSAMXG00000031383/ENSAMXG00000006543/ENSAMXG00000032958/ENSAMXG00000039120/ENSAMXG00000033230/ENSAMXG00000008399/ENSAMXG00000003563/ENSAMXG00000009714/ENSAMXG00000038875/ENSAMXG00000035728/ENSAMXG00000031770/ENSAMXG00000029313/ENSAMXG00000018451/ENSAMXG00000013963/ENSAMXG00000016742/ENSAMXG00000040618/ENSAMXG00000021163/ENSAMXG00000039794/ENSAMXG00000034930/ENSAMXG00000034264/ENSAMXG00000014881/…	inpp5ka/slc27a4/PLPP1/hmgcs1/fdps/rcor1/mvda/pik3r5/degs1/acot19/ISYNA1/BPNT2/vac14/pcyt1ab/ptgis/gal3st1a/pigb/hacd1/idi1/ptdss1b/slc27a6/ptdss2/agpat2/cers5/gnpat/pip4p1a/lss/cds2/pcyt1bb/ptgs2a/ormdl2/sptssa/pik3ca/aacs/sgms2b/nus1/serinc5//smpdl3b
MOLNG-2800	pachon_wild_vs_surface_wild	Down	Biological Process	GO:0006956	complement activation	9/585	27/9643	1.8267343120621857e-05	0.0063387680628557	0.006182053487663	9	1.64	9/1.64	ENSAMXG00000012950/ENSAMXG00000009027/ENSAMXG00000007167/ENSAMXG00000019600/ENSAMXG00000043781/ENSAMXG00000035474/ENSAMXG00000007196/ENSAMXG00000036291/ENSAMXG00000009003	c9/c7b//c3a.1/////c6
MOLNG-2800	pachon_wild_vs_surface_wild	Down	Biological Process	GO:0016072	rRNA metabolic process	13/585	60/9643	4.843640561107452e-05	0.0134459461976342	0.0131135194980719	13	3.64	13/3.64	ENSAMXG00000006658/ENSAMXG00000011236/ENSAMXG00000009478/ENSAMXG00000001647/ENSAMXG00000020989/ENSAMXG00000043138/ENSAMXG00000011549/ENSAMXG00000035201/ENSAMXG00000012949/ENSAMXG00000005458/ENSAMXG00000038087/ENSAMXG00000040261/ENSAMXG00000035273	UTP14C/bms1/utp6/ncl/utp23//BOP1/rpf2//pdcd11/nat10/heatr1/exosc3
MOLNG-2800	pachon_wild_vs_surface_wild	Down	Biological Process	GO:0022613	ribonucleoprotein complex biogenesis	20/585	125/9643	5.817164771039906e-05	0.0134570411703389	0.0131243401676444	20	7.58	20/7.58	ENSAMXG00000006658/ENSAMXG00000011236/ENSAMXG00000003899/ENSAMXG00000003634/ENSAMXG00000002368/ENSAMXG00000009478/ENSAMXG00000001647/ENSAMXG00000020989/ENSAMXG00000043138/ENSAMXG00000011549/ENSAMXG00000035201/ENSAMXG00000013761/ENSAMXG00000012949/ENSAMXG00000018885/ENSAMXG00000005458/ENSAMXG00000042216/ENSAMXG00000012862/ENSAMXG00000038035/ENSAMXG00000040261/ENSAMXG00000035273	UTP14C/bms1/mrto4/nip7/riok2/utp6/ncl/utp23//BOP1/rpf2/clns1a//ebna1bp2/pdcd11/zgc:158803/prmt7/eif2d/heatr1/exosc3
MOLNG-2800	pachon_wild_vs_surface_wild	Down	Biological Process	GO:0006959	humoral immune response	9/585	32/9643	8.316077110893045e-05	0.016489592899885	0.0160819175407645	9	1.94	9/1.94	ENSAMXG00000012950/ENSAMXG00000009027/ENSAMXG00000007167/ENSAMXG00000019600/ENSAMXG00000043781/ENSAMXG00000035474/ENSAMXG00000007196/ENSAMXG00000036291/ENSAMXG00000009003	c9/c7b//c3a.1/////c6
MOLNG-2800	pachon_wild_vs_surface_wild	Down	Biological Process	GO:0006364	rRNA processing	12/585	56/9643	0.00010555519504051628	0.0174028394544202	0.0169725857260613	12	3.4	12/3.4	ENSAMXG00000006658/ENSAMXG00000011236/ENSAMXG00000009478/ENSAMXG00000001647/ENSAMXG00000020989/ENSAMXG00000043138/ENSAMXG00000011549/ENSAMXG00000035201/ENSAMXG00000012949/ENSAMXG00000005458/ENSAMXG00000040261/ENSAMXG00000035273	UTP14C/bms1/utp6/ncl/utp23//BOP1/rpf2//pdcd11/heatr1/exosc3
MOLNG-2800	pachon_wild_vs_surface_wild	Down	Biological Process	GO:0008299	isoprenoid biosynthetic process	7/585	20/9643	0.00011284261894076544	0.0174028394544202	0.0169725857260613	7	1.21	7/1.21	ENSAMXG00000039120/ENSAMXG00000033230/ENSAMXG00000008399/ENSAMXG00000003563/ENSAMXG00000034930/ENSAMXG00000006084/ENSAMXG00000032738	hmgcs1/fdps/rcor1/mvda/idi1/lss/nus1
MOLNG-2800	pachon_wild_vs_surface_wild	Down	Biological Process	GO:0002253	activation of immune response	9/585	34/9643	0.00013942692185174864	0.0193524567530227	0.0188740022632998	9	2.06	9/2.06	ENSAMXG00000012950/ENSAMXG00000009027/ENSAMXG00000007167/ENSAMXG00000019600/ENSAMXG00000043781/ENSAMXG00000035474/ENSAMXG00000007196/ENSAMXG00000036291/ENSAMXG00000009003	c9/c7b//c3a.1/////c6
MOLNG-2800	pachon_wild_vs_surface_wild	Down	Biological Process	GO:0008104	protein localization	47/585	449/9643	0.00015612905774118097	0.0197006483767962	0.0192135854789625	47	27.24	47/27.24	ENSAMXG00000031471/ENSAMXG00000003069/ENSAMXG00000011854/ENSAMXG00000031890/ENSAMXG00000003669/ENSAMXG00000030683/ENSAMXG00000018129/ENSAMXG00000040927/ENSAMXG00000010246/ENSAMXG00000009781/ENSAMXG00000008201/ENSAMXG00000034251/ENSAMXG00000042171/ENSAMXG00000041122/ENSAMXG00000016767/ENSAMXG00000032669/ENSAMXG00000021830/ENSAMXG00000010366/ENSAMXG00000001820/ENSAMXG00000029647/ENSAMXG00000002897/…	/xpo1a/kpna6/ap3m2/nup93/arl8ba/sec24a/BET1L/tnpo2/arcn1b/yif1a/scamp2l/copz2/selenos/sec24c/srp54/VAPA/srp9/cog3/cplane2/sec23a/kpna4/ipo11/ap2a1/copa/sft2d2b/tram2/copb2/vps52/copg2/dop1b/stx5a/nkx6.1/snx4/cog7/get4//ap1s2/vps52/cog2/thoc2/agrn/mon1bb/arcn1a/cltcb/rab4b/KDELR3
MOLNG-2800	pachon_wild_vs_surface_wild	Down	Biological Process	GO:0045184	establishment of protein localization	44/585	413/9643	0.000170565197396361	0.019728707832179	0.0192409512150631	44	25.05	44/25.05	ENSAMXG00000031471/ENSAMXG00000003069/ENSAMXG00000011854/ENSAMXG00000031890/ENSAMXG00000003669/ENSAMXG00000030683/ENSAMXG00000018129/ENSAMXG00000040927/ENSAMXG00000010246/ENSAMXG00000009781/ENSAMXG00000008201/ENSAMXG00000034251/ENSAMXG00000042171/ENSAMXG00000041122/ENSAMXG00000016767/ENSAMXG00000032669/ENSAMXG00000010366/ENSAMXG00000001820/ENSAMXG00000029647/ENSAMXG00000002897/ENSAMXG00000014246/…	/xpo1a/kpna6/ap3m2/nup93/arl8ba/sec24a/BET1L/tnpo2/arcn1b/yif1a/scamp2l/copz2/selenos/sec24c/srp54/srp9/cog3/cplane2/sec23a/kpna4/ipo11/ap2a1/copa/sft2d2b/tram2/copb2/vps52/copg2/dop1b/stx5a/nkx6.1/snx4/cog7/get4//ap1s2/vps52/cog2/thoc2/mon1bb/arcn1a/cltcb/rab4b
MOLNG-2800	pachon_wild_vs_surface_wild	Down	Biological Process	GO:0008654	phospholipid biosynthetic process	12/585	60/9643	0.0002117422446641664	0.0226075565841433	0.022048625638714	12	3.64	12/3.64	ENSAMXG00000039120/ENSAMXG00000003563/ENSAMXG00000031770/ENSAMXG00000018451/ENSAMXG00000013963/ENSAMXG00000021163/ENSAMXG00000034930/ENSAMXG00000034264/ENSAMXG00000013424/ENSAMXG00000030286/ENSAMXG00000038353/ENSAMXG00000019246	hmgcs1/mvda/ISYNA1/vac14/pcyt1ab/pigb/idi1/ptdss1b/ptdss2/agpat2/cds2/pcyt1bb
MOLNG-2800	pachon_wild_vs_surface_wild	Down	Biological Process	GO:0042254	ribosome biogenesis	16/585	98/9643	0.0002475120648221783	0.0227303020613144	0.0221683364559763	16	5.95	16/5.95	ENSAMXG00000006658/ENSAMXG00000011236/ENSAMXG00000003899/ENSAMXG00000003634/ENSAMXG00000002368/ENSAMXG00000009478/ENSAMXG00000001647/ENSAMXG00000020989/ENSAMXG00000043138/ENSAMXG00000011549/ENSAMXG00000035201/ENSAMXG00000012949/ENSAMXG00000018885/ENSAMXG00000005458/ENSAMXG00000040261/ENSAMXG00000035273	UTP14C/bms1/mrto4/nip7/riok2/utp6/ncl/utp23//BOP1/rpf2//ebna1bp2/pdcd11/heatr1/exosc3
MOLNG-2800	pachon_wild_vs_surface_wild	Down	Biological Process	GO:0015031	protein transport	43/585	408/9643	0.0002562862920657028	0.0227303020613144	0.0221683364559763	43	24.75	43/24.75	ENSAMXG00000031471/ENSAMXG00000003069/ENSAMXG00000011854/ENSAMXG00000031890/ENSAMXG00000003669/ENSAMXG00000030683/ENSAMXG00000018129/ENSAMXG00000040927/ENSAMXG00000010246/ENSAMXG00000009781/ENSAMXG00000008201/ENSAMXG00000034251/ENSAMXG00000042171/ENSAMXG00000041122/ENSAMXG00000016767/ENSAMXG00000032669/ENSAMXG00000010366/ENSAMXG00000001820/ENSAMXG00000029647/ENSAMXG00000002897/ENSAMXG00000014246/…	/xpo1a/kpna6/ap3m2/nup93/arl8ba/sec24a/BET1L/tnpo2/arcn1b/yif1a/scamp2l/copz2/selenos/sec24c/srp54/srp9/cog3/cplane2/sec23a/kpna4/ipo11/ap2a1/copa/sft2d2b/tram2/copb2/vps52/copg2/dop1b/stx5a/nkx6.1/snx4/cog7//ap1s2/vps52/cog2/thoc2/mon1bb/arcn1a/cltcb/rab4b
MOLNG-2800	pachon_wild_vs_surface_wild	Down	Biological Process	GO:0042886	amide transport	44/585	421/9643	0.0002620207730410893	0.0227303020613144	0.0221683364559763	44	25.54	44/25.54	ENSAMXG00000031471/ENSAMXG00000003069/ENSAMXG00000011854/ENSAMXG00000031890/ENSAMXG00000003669/ENSAMXG00000030683/ENSAMXG00000018129/ENSAMXG00000040927/ENSAMXG00000010246/ENSAMXG00000009781/ENSAMXG00000008201/ENSAMXG00000034251/ENSAMXG00000042171/ENSAMXG00000041122/ENSAMXG00000016767/ENSAMXG00000032669/ENSAMXG00000035355/ENSAMXG00000010366/ENSAMXG00000001820/ENSAMXG00000029647/ENSAMXG00000002897/…	/xpo1a/kpna6/ap3m2/nup93/arl8ba/sec24a/BET1L/tnpo2/arcn1b/yif1a/scamp2l/copz2/selenos/sec24c/srp54/slc33a1/srp9/cog3/cplane2/sec23a/kpna4/ipo11/ap2a1/copa/sft2d2b/tram2/copb2/vps52/copg2/dop1b/stx5a/nkx6.1/snx4/cog7//ap1s2/vps52/cog2/thoc2/mon1bb/arcn1a/cltcb/rab4b
MOLNG-2800	pachon_wild_vs_surface_wild	Down	Biological Process	GO:0015833	peptide transport	43/585	412/9643	0.0003167497619118166	0.025861686443153	0.0252223030228232	43	24.99	43/24.99	ENSAMXG00000031471/ENSAMXG00000003069/ENSAMXG00000011854/ENSAMXG00000031890/ENSAMXG00000003669/ENSAMXG00000030683/ENSAMXG00000018129/ENSAMXG00000040927/ENSAMXG00000010246/ENSAMXG00000009781/ENSAMXG00000008201/ENSAMXG00000034251/ENSAMXG00000042171/ENSAMXG00000041122/ENSAMXG00000016767/ENSAMXG00000032669/ENSAMXG00000010366/ENSAMXG00000001820/ENSAMXG00000029647/ENSAMXG00000002897/ENSAMXG00000014246/…	/xpo1a/kpna6/ap3m2/nup93/arl8ba/sec24a/BET1L/tnpo2/arcn1b/yif1a/scamp2l/copz2/selenos/sec24c/srp54/srp9/cog3/cplane2/sec23a/kpna4/ipo11/ap2a1/copa/sft2d2b/tram2/copb2/vps52/copg2/dop1b/stx5a/nkx6.1/snx4/cog7//ap1s2/vps52/cog2/thoc2/mon1bb/arcn1a/cltcb/rab4b
MOLNG-2800	pachon_wild_vs_surface_wild	Down	Biological Process	GO:0050778	positive regulation of immune response	9/585	38/9643	0.0003484710432449828	0.0268709893346686	0.0262066527259092	9	2.31	9/2.31	ENSAMXG00000012950/ENSAMXG00000009027/ENSAMXG00000007167/ENSAMXG00000019600/ENSAMXG00000043781/ENSAMXG00000035474/ENSAMXG00000007196/ENSAMXG00000036291/ENSAMXG00000009003	c9/c7b//c3a.1/////c6
MOLNG-2800	pachon_wild_vs_surface_wild	Down	Biological Process	GO:0071705	nitrogen compound transport	48/585	481/9643	0.0004078137258902593	0.0297918658702989	0.0290553158722921	48	29.18	48/29.18	ENSAMXG00000007338/ENSAMXG00000031471/ENSAMXG00000003069/ENSAMXG00000011854/ENSAMXG00000031890/ENSAMXG00000003669/ENSAMXG00000030683/ENSAMXG00000016896/ENSAMXG00000018129/ENSAMXG00000040927/ENSAMXG00000010246/ENSAMXG00000009781/ENSAMXG00000008201/ENSAMXG00000034251/ENSAMXG00000020980/ENSAMXG00000042171/ENSAMXG00000041122/ENSAMXG00000016767/ENSAMXG00000032669/ENSAMXG00000035355/ENSAMXG00000010366/…	slc3a2b//xpo1a/kpna6/ap3m2/nup93/arl8ba/zgc:91890/sec24a/BET1L/tnpo2/arcn1b/yif1a/scamp2l//copz2/selenos/sec24c/srp54/slc33a1/srp9/cog3/cplane2/sec23a/kpna4/ipo11/ap2a1/copa/sft2d2b/tram2/copb2/vps52/copg2/dop1b/stx5a/nkx6.1/snx4/cog7/slc29a2//ap1s2/vps52/cog2/thoc2/mon1bb/arcn1a/cltcb/rab4b
MOLNG-2800	pachon_wild_vs_surface_wild	Down	Biological Process	GO:0006644	phospholipid metabolic process	20/585	148/9643	0.0005982523665365567	0.041518714237637	0.0404922391245269	20	8.98	20/8.98	ENSAMXG00000031383/ENSAMXG00000032958/ENSAMXG00000039120/ENSAMXG00000003563/ENSAMXG00000009714/ENSAMXG00000031770/ENSAMXG00000029313/ENSAMXG00000018451/ENSAMXG00000013963/ENSAMXG00000021163/ENSAMXG00000034930/ENSAMXG00000034264/ENSAMXG00000013424/ENSAMXG00000030286/ENSAMXG00000014236/ENSAMXG00000038353/ENSAMXG00000019246/ENSAMXG00000009771/ENSAMXG00000008404/ENSAMXG00000001519	inpp5ka/PLPP1/hmgcs1/mvda/pik3r5/ISYNA1/BPNT2/vac14/pcyt1ab/pigb/idi1/ptdss1b/ptdss2/agpat2/pip4p1a/cds2/pcyt1bb/pik3ca/serinc5/smpdl3b
MOLNG-2800	pachon_wild_vs_surface_wild	Down	Biological Process	GO:0002684	positive regulation of immune system process	10/585	50/9643	0.0007061064182409517	0.0466702718342114	0.0455164337773365	10	3.03	10/3.03	ENSAMXG00000012950/ENSAMXG00000014987/ENSAMXG00000009027/ENSAMXG00000007167/ENSAMXG00000019600/ENSAMXG00000043781/ENSAMXG00000035474/ENSAMXG00000007196/ENSAMXG00000036291/ENSAMXG00000009003	c9/gnb1a/c7b//c3a.1/////c6
MOLNG-2800	pachon_wild_vs_surface_wild	Down	Biological Process	GO:0033865	nucleoside bisphosphate metabolic process	7/585	27/9643	0.0008910404179964346	0.0515318375074604	0.0502578060326059	7	1.64	7/1.64	ENSAMXG00000039120/ENSAMXG00000007727/ENSAMXG00000003563/ENSAMXG00000035728/ENSAMXG00000000394/ENSAMXG00000021373/ENSAMXG00000009007	hmgcs1/pank1b/mvda/acot19/aclya/aclyb/pank4
MOLNG-2800	pachon_wild_vs_surface_wild	Down	Biological Process	GO:0033875	ribonucleoside bisphosphate metabolic process	7/585	27/9643	0.0008910404179964346	0.0515318375074604	0.0502578060326059	7	1.64	7/1.64	ENSAMXG00000039120/ENSAMXG00000007727/ENSAMXG00000003563/ENSAMXG00000035728/ENSAMXG00000000394/ENSAMXG00000021373/ENSAMXG00000009007	hmgcs1/pank1b/mvda/acot19/aclya/aclyb/pank4
MOLNG-2800	pachon_wild_vs_surface_wild	Down	Biological Process	GO:0034032	purine nucleoside bisphosphate metabolic process	7/585	27/9643	0.0008910404179964346	0.0515318375074604	0.0502578060326059	7	1.64	7/1.64	ENSAMXG00000039120/ENSAMXG00000007727/ENSAMXG00000003563/ENSAMXG00000035728/ENSAMXG00000000394/ENSAMXG00000021373/ENSAMXG00000009007	hmgcs1/pank1b/mvda/acot19/aclya/aclyb/pank4
MOLNG-2800	pachon_wild_vs_surface_wild	Down	Biological Process	GO:0008202	steroid metabolic process	9/585	44/9643	0.0010941274613321	0.0607459566531632	0.0592441227483451	9	2.67	9/2.67	ENSAMXG00000039120/ENSAMXG00000029262/ENSAMXG00000003563/ENSAMXG00000020944/ENSAMXG00000016057/ENSAMXG00000035191/ENSAMXG00000033546/ENSAMXG00000016393/ENSAMXG00000000632	hmgcs1/hsd17b7/mvda/vldlr/ebp/nsdhl/ch25hl3/sqlea/
MOLNG-2800	pachon_wild_vs_surface_wild	Down	Biological Process	GO:0034613	cellular protein localization	29/585	265/9643	0.0014264177365132	0.0761487622415529	0.0742661218281791	29	16.08	29/16.08	ENSAMXG00000031471/ENSAMXG00000011854/ENSAMXG00000031890/ENSAMXG00000018129/ENSAMXG00000010246/ENSAMXG00000041122/ENSAMXG00000016767/ENSAMXG00000032669/ENSAMXG00000021830/ENSAMXG00000010366/ENSAMXG00000001820/ENSAMXG00000002897/ENSAMXG00000014246/ENSAMXG00000005993/ENSAMXG00000010351/ENSAMXG00000006369/ENSAMXG00000042373/ENSAMXG00000005818/ENSAMXG00000014507/ENSAMXG00000005710/ENSAMXG00000011966/…	/kpna6/ap3m2/sec24a/tnpo2/selenos/sec24c/srp54/VAPA/srp9/cog3/sec23a/kpna4/ipo11/ap2a1/copa/tram2/copb2/copg2/stx5a/cog7/get4//ap1s2/thoc2/agrn/mon1bb/cltcb/KDELR3
MOLNG-2800	pachon_wild_vs_surface_wild	Down	Biological Process	GO:0070727	cellular macromolecule localization	29/585	266/9643	0.0015118048083792	0.0777179657048285	0.0757965295741009	29	16.14	29/16.14	ENSAMXG00000031471/ENSAMXG00000011854/ENSAMXG00000031890/ENSAMXG00000018129/ENSAMXG00000010246/ENSAMXG00000041122/ENSAMXG00000016767/ENSAMXG00000032669/ENSAMXG00000021830/ENSAMXG00000010366/ENSAMXG00000001820/ENSAMXG00000002897/ENSAMXG00000014246/ENSAMXG00000005993/ENSAMXG00000010351/ENSAMXG00000006369/ENSAMXG00000042373/ENSAMXG00000005818/ENSAMXG00000014507/ENSAMXG00000005710/ENSAMXG00000011966/…	/kpna6/ap3m2/sec24a/tnpo2/selenos/sec24c/srp54/VAPA/srp9/cog3/sec23a/kpna4/ipo11/ap2a1/copa/tram2/copb2/copg2/stx5a/cog7/get4//ap1s2/thoc2/agrn/mon1bb/cltcb/KDELR3
MOLNG-2800	pachon_wild_vs_surface_wild	Down	Biological Process	GO:0006694	steroid biosynthetic process	6/585	22/9643	0.00156927679477	0.077791292540744	0.0758680435366274	6	1.33	6/1.33	ENSAMXG00000039120/ENSAMXG00000029262/ENSAMXG00000003563/ENSAMXG00000035191/ENSAMXG00000016393/ENSAMXG00000000632	hmgcs1/hsd17b7/mvda/nsdhl/sqlea/
MOLNG-2800	pachon_wild_vs_surface_wild	Down	Biological Process	GO:0002252	immune effector process	11/585	65/9643	0.001665574950353	0.0797178631410371	0.0777469831634868	11	3.94	11/3.94	ENSAMXG00000025872/ENSAMXG00000012950/ENSAMXG00000009027/ENSAMXG00000007167/ENSAMXG00000019600/ENSAMXG00000043781/ENSAMXG00000035474/ENSAMXG00000007196/ENSAMXG00000039262/ENSAMXG00000036291/ENSAMXG00000009003	ch25h/c9/c7b//c3a.1//////c6
MOLNG-2800	pachon_wild_vs_surface_wild	Down	Biological Process	GO:0046907	intracellular transport	35/585	346/9643	0.0019345233957249	0.0878757936324277	0.0857032235790248	35	20.99	35/20.99	ENSAMXG00000031471/ENSAMXG00000003069/ENSAMXG00000011854/ENSAMXG00000031890/ENSAMXG00000003669/ENSAMXG00000010513/ENSAMXG00000018129/ENSAMXG00000018489/ENSAMXG00000010246/ENSAMXG00000008201/ENSAMXG00000006908/ENSAMXG00000041122/ENSAMXG00000014373/ENSAMXG00000016767/ENSAMXG00000032669/ENSAMXG00000010366/ENSAMXG00000001820/ENSAMXG00000002897/ENSAMXG00000014246/ENSAMXG00000005993/ENSAMXG00000010351/…	/xpo1a/kpna6/ap3m2/nup93/ccdc88b/sec24a/kif13ba/tnpo2/yif1a/nup155/selenos/HOOK3/sec24c/srp54/srp9/cog3/sec23a/kpna4/ipo11/ap2a1/copa/tram2/copb2/copg2/sec31a/dop1b/stx5a/cog7//ap1s2/thoc2/mon1bb/cltcb/SEC16A
MOLNG-2800	pachon_wild_vs_surface_wild	Down	Biological Process	GO:0019637	organophosphate metabolic process	38/585	385/9643	0.0019626438059115	0.0878757936324277	0.0857032235790248	38	23.36	38/23.36	ENSAMXG00000031383/ENSAMXG00000040266/ENSAMXG00000032958/ENSAMXG00000039120/ENSAMXG00000007727/ENSAMXG00000003563/ENSAMXG00000029233/ENSAMXG00000009714/ENSAMXG00000035728/ENSAMXG00000003475/ENSAMXG00000037569/ENSAMXG00000031770/ENSAMXG00000029313/ENSAMXG00000000394/ENSAMXG00000001913/ENSAMXG00000021373/ENSAMXG00000009007/ENSAMXG00000018451/ENSAMXG00000013963/ENSAMXG00000032837/ENSAMXG00000021163/…	inpp5ka/pgd/PLPP1/hmgcs1/pank1b/mvda/rfk/pik3r5/acot19/hk2/nampta/ISYNA1/BPNT2/aclya/ctps1b/aclyb/pank4/vac14/pcyt1ab/nt5c3a/pigb/idi1/gapdhs/ptdss1b/h6pd/ptdss2/agpat2/g6pd/impdh1b/pip4p1a/eno1a/cds2/pcyt1bb/pik3ca/serinc5/nadka//smpdl3b
MOLNG-2800	pachon_wild_vs_surface_wild	Down	Biological Process	GO:0001676	long-chain fatty acid metabolic process	4/585	11/9643	0.003139086188626	0.1320318675700876	0.1287676184552804	4	0.67	4/0.67	ENSAMXG00000006543/ENSAMXG00000014881/ENSAMXG00000005495/ENSAMXG00000000632	slc27a4/slc27a6/ptgs2a/
MOLNG-2800	pachon_wild_vs_surface_wild	Down	Biological Process	GO:0006739	NADP metabolic process	4/585	11/9643	0.003139086188626	0.1320318675700876	0.1287676184552804	4	0.67	4/0.67	ENSAMXG00000040266/ENSAMXG00000016984/ENSAMXG00000017509/ENSAMXG00000038095	pgd/h6pd/g6pd/nadka
MOLNG-2800	pachon_wild_vs_surface_wild	Down	Biological Process	GO:0006886	intracellular protein transport	25/585	234/9643	0.0040679005052111	0.1598976207537979	0.1559444412933294	25	14.2	25/14.2	ENSAMXG00000031471/ENSAMXG00000011854/ENSAMXG00000031890/ENSAMXG00000018129/ENSAMXG00000010246/ENSAMXG00000041122/ENSAMXG00000016767/ENSAMXG00000032669/ENSAMXG00000010366/ENSAMXG00000001820/ENSAMXG00000002897/ENSAMXG00000014246/ENSAMXG00000005993/ENSAMXG00000010351/ENSAMXG00000006369/ENSAMXG00000042373/ENSAMXG00000005818/ENSAMXG00000014507/ENSAMXG00000005710/ENSAMXG00000011966/ENSAMXG00000034192/…	/kpna6/ap3m2/sec24a/tnpo2/selenos/sec24c/srp54/srp9/cog3/sec23a/kpna4/ipo11/ap2a1/copa/tram2/copb2/copg2/stx5a/cog7//ap1s2/thoc2/mon1bb/cltcb
MOLNG-2800	pachon_wild_vs_surface_wild	Down	Biological Process	GO:0006720	isoprenoid metabolic process	7/585	35/9643	0.0044244535065565	0.1598976207537979	0.1559444412933294	7	2.12	7/2.12	ENSAMXG00000039120/ENSAMXG00000033230/ENSAMXG00000008399/ENSAMXG00000003563/ENSAMXG00000034930/ENSAMXG00000006084/ENSAMXG00000032738	hmgcs1/fdps/rcor1/mvda/idi1/lss/nus1
MOLNG-2800	pachon_wild_vs_surface_wild	Down	Biological Process	GO:0072330	monocarboxylic acid biosynthetic process	8/585	44/9643	0.004445066217767	0.1598976207537979	0.1559444412933294	8	2.67	8/2.67	ENSAMXG00000029843/ENSAMXG00000008399/ENSAMXG00000039240/ENSAMXG00000016742/ENSAMXG00000039794/ENSAMXG00000035139/ENSAMXG00000005495/ENSAMXG00000000632	asns/rcor1/asns/ptgis/hacd1/asdurf/ptgs2a/
MOLNG-2800	pachon_wild_vs_surface_wild	Down	Biological Process	GO:0006084	acetyl-CoA metabolic process	4/585	12/9643	0.0044849078425823	0.1598976207537979	0.1559444412933294	4	0.73	4/0.73	ENSAMXG00000039120/ENSAMXG00000003563/ENSAMXG00000000394/ENSAMXG00000021373	hmgcs1/mvda/aclya/aclyb
MOLNG-2800	pachon_wild_vs_surface_wild	Down	Biological Process	GO:0006637	acyl-CoA metabolic process	5/585	19/9643	0.0046080005980921	0.1598976207537979	0.1559444412933294	5	1.15	5/1.15	ENSAMXG00000039120/ENSAMXG00000003563/ENSAMXG00000035728/ENSAMXG00000000394/ENSAMXG00000021373	hmgcs1/mvda/acot19/aclya/aclyb
MOLNG-2800	pachon_wild_vs_surface_wild	Down	Biological Process	GO:0035383	thioester metabolic process	5/585	19/9643	0.0046080005980921	0.1598976207537979	0.1559444412933294	5	1.15	5/1.15	ENSAMXG00000039120/ENSAMXG00000003563/ENSAMXG00000035728/ENSAMXG00000000394/ENSAMXG00000021373	hmgcs1/mvda/acot19/aclya/aclyb
MOLNG-2800	pachon_wild_vs_surface_wild	Down	Biological Process	GO:0070972	protein localization to endoplasmic reticulum	5/585	19/9643	0.0046080005980921	0.1598976207537979	0.1559444412933294	5	1.15	5/1.15	ENSAMXG00000032669/ENSAMXG00000021830/ENSAMXG00000010366/ENSAMXG00000042373/ENSAMXG00000012768	srp54/VAPA/srp9/tram2/KDELR3
MOLNG-2800	pachon_wild_vs_surface_wild	Down	Biological Process	GO:0006732	coenzyme metabolic process	12/585	85/9643	0.0049980535266745	0.1669640494408441	0.1628361653123961	12	5.16	12/5.16	ENSAMXG00000039120/ENSAMXG00000007727/ENSAMXG00000003563/ENSAMXG00000029233/ENSAMXG00000035728/ENSAMXG00000037569/ENSAMXG00000000394/ENSAMXG00000021373/ENSAMXG00000009007/ENSAMXG00000018589/ENSAMXG00000029286/ENSAMXG00000038095	hmgcs1/pank1b/mvda/rfk/acot19/nampta/aclya/aclyb/pank4/mat2aa/ubiad1/nadka
MOLNG-2800	pachon_wild_vs_surface_wild	Down	Biological Process	GO:0034470	ncRNA processing	17/585	141/9643	0.0050522262799102	0.1669640494408441	0.1628361653123961	17	8.55	17/8.55	ENSAMXG00000010730/ENSAMXG00000006658/ENSAMXG00000011236/ENSAMXG00000002100/ENSAMXG00000009478/ENSAMXG00000001647/ENSAMXG00000020989/ENSAMXG00000043138/ENSAMXG00000011549/ENSAMXG00000035201/ENSAMXG00000037952/ENSAMXG00000012949/ENSAMXG00000005458/ENSAMXG00000009723/ENSAMXG00000038087/ENSAMXG00000040261/ENSAMXG00000035273	dicer1/UTP14C/bms1/ddx1/utp6/ncl/utp23//BOP1/rpf2/trmt61a//pdcd11/elp3/nat10/heatr1/exosc3
MOLNG-2800	pachon_wild_vs_surface_wild	Down	Biological Process	GO:0048193	Golgi vesicle transport	10/585	65/9643	0.0054359649610708	0.1754678922317738	0.1711297659715313	10	3.94	10/3.94	ENSAMXG00000018129/ENSAMXG00000009781/ENSAMXG00000008201/ENSAMXG00000042171/ENSAMXG00000016767/ENSAMXG00000002897/ENSAMXG00000001550/ENSAMXG00000002101/ENSAMXG00000003449/ENSAMXG00000014823	sec24a/arcn1b/yif1a/copz2/sec24c/sec23a/sec31a/dop1b/arcn1a/SEC16A
MOLNG-2800	pachon_wild_vs_surface_wild	Down	Biological Process	GO:0002250	adaptive immune response	6/585	28/9643	0.0058098792133704	0.1832752806399585	0.1787441308228322	6	1.7	6/1.7	ENSAMXG00000012950/ENSAMXG00000002336/ENSAMXG00000009027/ENSAMXG00000019793/ENSAMXG00000009003/ENSAMXG00000018954	c9/btk/c7b/tec/c6/
MOLNG-2800	pachon_wild_vs_surface_wild	Down	Biological Process	GO:0016192	vesicle-mediated transport	37/585	399/9643	0.0063091203871743	0.194601313275511	0.1897901477872799	37	24.21	37/24.21	ENSAMXG00000012966/ENSAMXG00000031890/ENSAMXG00000036818/ENSAMXG00000040350/ENSAMXG00000018129/ENSAMXG00000009781/ENSAMXG00000008201/ENSAMXG00000042171/ENSAMXG00000016767/ENSAMXG00000004651/ENSAMXG00000007179/ENSAMXG00000020944/ENSAMXG00000036629/ENSAMXG00000042800/ENSAMXG00000029647/ENSAMXG00000001202/ENSAMXG00000002897/ENSAMXG00000043207/ENSAMXG00000010351/ENSAMXG00000006369/ENSAMXG00000030882/…	dab2/ap3m2/ykt6/yipf2/sec24a/arcn1b/yif1a/copz2/sec24c/mrc1b/ncf2/vldlr/stx5al/ncf4/cplane2/clint1a/sec23a/scarb2a/ap2a1/copa/sft2d2b/llgl2/copb2/copg2/sec31a/golt1a/dop1b/stx5a/rab5ab//ap1s2/mrc1b/mon1bb/arcn1a/cltcb/SEC16A/rab4b
MOLNG-2800	pachon_wild_vs_surface_wild	Down	Biological Process	GO:0050776	regulation of immune response	9/585	58/9643	0.0077281028471326	0.2331871033004371	0.2274219739453679	9	3.52	9/3.52	ENSAMXG00000012950/ENSAMXG00000009027/ENSAMXG00000007167/ENSAMXG00000019600/ENSAMXG00000043781/ENSAMXG00000035474/ENSAMXG00000007196/ENSAMXG00000036291/ENSAMXG00000009003	c9/c7b//c3a.1/////c6
MOLNG-2800	pachon_wild_vs_surface_wild	Down	Biological Process	GO:0051641	cellular localization	40/585	446/9643	0.0080398181359964	0.2342744282138052	0.2284824167169374	40	27.06	40/27.06	ENSAMXG00000031471/ENSAMXG00000003069/ENSAMXG00000011854/ENSAMXG00000031890/ENSAMXG00000003155/ENSAMXG00000003669/ENSAMXG00000010513/ENSAMXG00000018129/ENSAMXG00000018489/ENSAMXG00000010246/ENSAMXG00000008201/ENSAMXG00000006908/ENSAMXG00000041122/ENSAMXG00000014373/ENSAMXG00000016767/ENSAMXG00000032669/ENSAMXG00000021830/ENSAMXG00000010366/ENSAMXG00000001820/ENSAMXG00000002897/ENSAMXG00000014246/…	/xpo1a/kpna6/ap3m2/rab11a/nup93/ccdc88b/sec24a/kif13ba/tnpo2/yif1a/nup155/selenos/HOOK3/sec24c/srp54/VAPA/srp9/cog3/sec23a/kpna4/ipo11/ap2a1/copa/tram2/copb2/copg2/sec31a/dop1b/stx5a/cog7/get4//ap1s2/thoc2/agrn/mon1bb/cltcb/SEC16A/KDELR3
MOLNG-2800	pachon_wild_vs_surface_wild	Down	Biological Process	GO:0032787	monocarboxylic acid metabolic process	16/585	136/9643	0.0081017093330422	0.2342744282138052	0.2284824167169374	16	8.25	16/8.25	ENSAMXG00000006543/ENSAMXG00000040266/ENSAMXG00000029843/ENSAMXG00000008399/ENSAMXG00000035728/ENSAMXG00000003475/ENSAMXG00000039240/ENSAMXG00000016742/ENSAMXG00000039794/ENSAMXG00000016577/ENSAMXG00000014881/ENSAMXG00000035139/ENSAMXG00000024777/ENSAMXG00000005495/ENSAMXG00000037474/ENSAMXG00000000632	slc27a4/pgd/asns/rcor1/acot19/hk2/asns/ptgis/hacd1/gapdhs/slc27a6/asdurf/eno1a/ptgs2a/aacs/
MOLNG-2800	pachon_wild_vs_surface_wild	Down	Biological Process	GO:0006665	sphingolipid metabolic process	7/585	40/9643	0.0094405624041451	0.2626667875081058	0.256172826281984	7	2.43	7/2.43	ENSAMXG00000038875/ENSAMXG00000004553/ENSAMXG00000034523/ENSAMXG00000039032/ENSAMXG00000037894/ENSAMXG00000008404/ENSAMXG00000001519	degs1/cers5/ormdl2/sptssa/sgms2b/serinc5/smpdl3b
MOLNG-2800	pachon_wild_vs_surface_wild	Down	Biological Process	GO:0009108	coenzyme biosynthetic process	9/585	60/9643	0.0096387783980152	0.2626667875081058	0.256172826281984	9	3.64	9/3.64	ENSAMXG00000007727/ENSAMXG00000029233/ENSAMXG00000037569/ENSAMXG00000000394/ENSAMXG00000021373/ENSAMXG00000009007/ENSAMXG00000018589/ENSAMXG00000029286/ENSAMXG00000038095	pank1b/rfk/nampta/aclya/aclyb/pank4/mat2aa/ubiad1/nadka
MOLNG-2800	pachon_wild_vs_surface_wild	Down	Biological Process	GO:0006888	endoplasmic reticulum to Golgi vesicle-mediated transport	6/585	31/9643	0.0097320010504617	0.2626667875081058	0.256172826281984	6	1.88	6/1.88	ENSAMXG00000018129/ENSAMXG00000008201/ENSAMXG00000016767/ENSAMXG00000002897/ENSAMXG00000001550/ENSAMXG00000014823	sec24a/yif1a/sec24c/sec23a/sec31a/SEC16A
MOLNG-2800	pachon_wild_vs_surface_wild	Down	Biological Process	GO:0051649	establishment of localization in cell	36/585	397/9643	0.0098405424714852	0.2626667875081058	0.256172826281984	36	24.08	36/24.08	ENSAMXG00000031471/ENSAMXG00000003069/ENSAMXG00000011854/ENSAMXG00000031890/ENSAMXG00000003155/ENSAMXG00000003669/ENSAMXG00000010513/ENSAMXG00000018129/ENSAMXG00000018489/ENSAMXG00000010246/ENSAMXG00000008201/ENSAMXG00000006908/ENSAMXG00000041122/ENSAMXG00000014373/ENSAMXG00000016767/ENSAMXG00000032669/ENSAMXG00000010366/ENSAMXG00000001820/ENSAMXG00000002897/ENSAMXG00000014246/ENSAMXG00000005993/…	/xpo1a/kpna6/ap3m2/rab11a/nup93/ccdc88b/sec24a/kif13ba/tnpo2/yif1a/nup155/selenos/HOOK3/sec24c/srp54/srp9/cog3/sec23a/kpna4/ipo11/ap2a1/copa/tram2/copb2/copg2/sec31a/dop1b/stx5a/cog7//ap1s2/thoc2/mon1bb/cltcb/SEC16A
MOLNG-2800	pachon_wild_vs_surface_wild	Down	Biological Process	GO:0033866	nucleoside bisphosphate biosynthetic process	4/585	15/9643	0.0106942270047452	0.2698834015015719	0.2632110225474151	4	0.91	4/0.91	ENSAMXG00000007727/ENSAMXG00000000394/ENSAMXG00000021373/ENSAMXG00000009007	pank1b/aclya/aclyb/pank4
MOLNG-2800	pachon_wild_vs_surface_wild	Down	Biological Process	GO:0034030	ribonucleoside bisphosphate biosynthetic process	4/585	15/9643	0.0106942270047452	0.2698834015015719	0.2632110225474151	4	0.91	4/0.91	ENSAMXG00000007727/ENSAMXG00000000394/ENSAMXG00000021373/ENSAMXG00000009007	pank1b/aclya/aclyb/pank4
MOLNG-2800	pachon_wild_vs_surface_wild	Down	Biological Process	GO:0034033	purine nucleoside bisphosphate biosynthetic process	4/585	15/9643	0.0106942270047452	0.2698834015015719	0.2632110225474151	4	0.91	4/0.91	ENSAMXG00000007727/ENSAMXG00000000394/ENSAMXG00000021373/ENSAMXG00000009007	pank1b/aclya/aclyb/pank4
MOLNG-2800	pachon_wild_vs_surface_wild	Down	Biological Process	GO:0006006	glucose metabolic process	6/585	32/9643	0.0113794142366429	0.2820469100082209	0.2750738103068194	6	1.94	6/1.94	ENSAMXG00000016139/ENSAMXG00000029327/ENSAMXG00000016577/ENSAMXG00000016984/ENSAMXG00000025154/ENSAMXG00000017509	fam3c/pgm2/gapdhs/h6pd/ppp1r3b/g6pd
MOLNG-2800	pachon_wild_vs_surface_wild	Down	Biological Process	GO:0005975	carbohydrate metabolic process	23/585	229/9643	0.0117610702143891	0.283138837391023	0.2761387417600908	23	13.89	23/13.89	ENSAMXG00000007338/ENSAMXG00000016139/ENSAMXG00000034933/ENSAMXG00000040266/ENSAMXG00000029327/ENSAMXG00000003475/ENSAMXG00000031770/ENSAMXG00000029313/ENSAMXG00000040507/ENSAMXG00000010933/ENSAMXG00000006789/ENSAMXG00000017945/ENSAMXG00000016577/ENSAMXG00000016984/ENSAMXG00000017128/ENSAMXG00000025154/ENSAMXG00000017509/ENSAMXG00000024777/ENSAMXG00000032467/ENSAMXG00000009139/ENSAMXG00000040311/…	slc3a2b/fam3c/man1a2/pgd/pgm2/hk2/ISYNA1/BPNT2/B4GALT1/b4galt7/man2a1/man1a1/gapdhs/h6pd/edem1/ppp1r3b/g6pd/eno1a/ldha/zgc:171967/hyal2b/b4galt5/
MOLNG-2800	pachon_wild_vs_surface_wild	Down	Biological Process	GO:0034660	ncRNA metabolic process	20/585	191/9643	0.0118314499774346	0.283138837391023	0.2761387417600908	20	11.59	20/11.59	ENSAMXG00000010730/ENSAMXG00000006658/ENSAMXG00000011236/ENSAMXG00000006079/ENSAMXG00000002100/ENSAMXG00000009478/ENSAMXG00000001647/ENSAMXG00000020989/ENSAMXG00000043138/ENSAMXG00000011549/ENSAMXG00000037912/ENSAMXG00000014553/ENSAMXG00000035201/ENSAMXG00000037952/ENSAMXG00000012949/ENSAMXG00000005458/ENSAMXG00000009723/ENSAMXG00000038087/ENSAMXG00000040261/ENSAMXG00000035273	dicer1/UTP14C/bms1/cars1/ddx1/utp6/ncl/utp23//BOP1/farsa/qars1/rpf2/trmt61a//pdcd11/elp3/nat10/heatr1/exosc3
MOLNG-2800	pachon_wild_vs_surface_wild	Down	Biological Process	GO:0032535	regulation of cellular component size	12/585	97/9643	0.0140384329934055	0.3302600846584232	0.3220950014187261	12	5.88	12/5.88	ENSAMXG00000042945/ENSAMXG00000010892/ENSAMXG00000002829/ENSAMXG00000040254/ENSAMXG00000001095/ENSAMXG00000000502/ENSAMXG00000038174/ENSAMXG00000004876/ENSAMXG00000013761/ENSAMXG00000043914/ENSAMXG00000009771/ENSAMXG00000009997	capza1a/nck1b/nde1/pfn1/nkx6.1/stat3/tmod2/lima1a/clns1a/pfn2/pik3ca/arpc1a
MOLNG-2800	pachon_wild_vs_surface_wild	Down	Biological Process	GO:0016125	sterol metabolic process	5/585	25/9643	0.0155886060092709	0.3606164190144672	0.351700830314428	5	1.52	5/1.52	ENSAMXG00000039120/ENSAMXG00000003563/ENSAMXG00000020944/ENSAMXG00000016057/ENSAMXG00000016393	hmgcs1/mvda/vldlr/ebp/sqlea
MOLNG-2800	pachon_wild_vs_surface_wild	Down	Biological Process	GO:0033365	protein localization to organelle	10/585	76/9643	0.0160074599858988	0.3642353190234024	0.355230259566279	10	4.61	10/4.61	ENSAMXG00000011854/ENSAMXG00000010246/ENSAMXG00000032669/ENSAMXG00000021830/ENSAMXG00000010366/ENSAMXG00000014246/ENSAMXG00000042373/ENSAMXG00000018598/ENSAMXG00000006415/ENSAMXG00000012768	kpna6/tnpo2/srp54/VAPA/srp9/kpna4/tram2/get4/mon1bb/KDELR3
MOLNG-2800	pachon_wild_vs_surface_wild	Down	Biological Process	GO:0030166	proteoglycan biosynthetic process	4/585	17/9643	0.0169337877512061	0.3741455029325663	0.3648954321032006	4	1.03	4/1.03	ENSAMXG00000005056/ENSAMXG00000018776/ENSAMXG00000021176/ENSAMXG00000039952	fam20b/xylt2/ext1b/b4galt5
MOLNG-2800	pachon_wild_vs_surface_wild	Down	Biological Process	GO:0022618	ribonucleoprotein complex assembly	6/585	35/9643	0.0174855529734955	0.3741455029325663	0.3648954321032006	6	2.12	6/2.12	ENSAMXG00000003899/ENSAMXG00000035201/ENSAMXG00000013761/ENSAMXG00000042216/ENSAMXG00000012862/ENSAMXG00000038035	mrto4/rpf2/clns1a/zgc:158803/prmt7/eif2d
MOLNG-2800	pachon_wild_vs_surface_wild	Down	Biological Process	GO:0071826	ribonucleoprotein complex subunit organization	6/585	35/9643	0.0174855529734955	0.3741455029325663	0.3648954321032006	6	2.12	6/2.12	ENSAMXG00000003899/ENSAMXG00000035201/ENSAMXG00000013761/ENSAMXG00000042216/ENSAMXG00000012862/ENSAMXG00000038035	mrto4/rpf2/clns1a/zgc:158803/prmt7/eif2d
MOLNG-2800	pachon_wild_vs_surface_wild	Down	Biological Process	GO:0006643	membrane lipid metabolic process	9/585	66/9643	0.0175212231200409	0.3741455029325663	0.3648954321032006	9	4.0	9/4	ENSAMXG00000038875/ENSAMXG00000040618/ENSAMXG00000021163/ENSAMXG00000004553/ENSAMXG00000034523/ENSAMXG00000039032/ENSAMXG00000037894/ENSAMXG00000008404/ENSAMXG00000001519	degs1/gal3st1a/pigb/cers5/ormdl2/sptssa/sgms2b/serinc5/smpdl3b
MOLNG-2800	pachon_wild_vs_surface_wild	Down	Biological Process	GO:0090407	organophosphate biosynthetic process	21/585	212/9643	0.0180007792999309	0.3785618434591543	0.3692025865982651	21	12.86	21/12.86	ENSAMXG00000039120/ENSAMXG00000007727/ENSAMXG00000003563/ENSAMXG00000029233/ENSAMXG00000037569/ENSAMXG00000031770/ENSAMXG00000000394/ENSAMXG00000001913/ENSAMXG00000021373/ENSAMXG00000009007/ENSAMXG00000018451/ENSAMXG00000013963/ENSAMXG00000021163/ENSAMXG00000034930/ENSAMXG00000034264/ENSAMXG00000013424/ENSAMXG00000030286/ENSAMXG00000016283/ENSAMXG00000038353/ENSAMXG00000019246/ENSAMXG00000038095	hmgcs1/pank1b/mvda/rfk/nampta/ISYNA1/aclya/ctps1b/aclyb/pank4/vac14/pcyt1ab/pigb/idi1/ptdss1b/ptdss2/agpat2/impdh1b/cds2/pcyt1bb/nadka
MOLNG-2800	pachon_wild_vs_surface_wild	Down	Biological Process	GO:0009067	aspartate family amino acid biosynthetic process	3/585	10/9643	0.0193377168301852	0.4006082232880177	0.3907039095619528	3	0.61	3/0.61	ENSAMXG00000029843/ENSAMXG00000039240/ENSAMXG00000035139	asns/asns/asdurf
MOLNG-2800	pachon_wild_vs_surface_wild	Down	Biological Process	GO:0090066	regulation of anatomical structure size	13/585	114/9643	0.0203784175328227	0.4159594637582047	0.4056756183778639	13	6.92	13/6.92	ENSAMXG00000042945/ENSAMXG00000010892/ENSAMXG00000002829/ENSAMXG00000009537/ENSAMXG00000040254/ENSAMXG00000001095/ENSAMXG00000000502/ENSAMXG00000038174/ENSAMXG00000004876/ENSAMXG00000013761/ENSAMXG00000043914/ENSAMXG00000009771/ENSAMXG00000009997	capza1a/nck1b/nde1/agt/pfn1/nkx6.1/stat3/tmod2/lima1a/clns1a/pfn2/pik3ca/arpc1a
MOLNG-2800	pachon_wild_vs_surface_wild	Down	Biological Process	GO:1901135	carbohydrate derivative metabolic process	34/585	391/9643	0.0211343002417248	0.4235671640426576	0.4130952320331091	34	23.72	34/23.72	ENSAMXG00000031428/ENSAMXG00000040266/ENSAMXG00000039120/ENSAMXG00000007727/ENSAMXG00000003563/ENSAMXG00000029233/ENSAMXG00000020985/ENSAMXG00000035728/ENSAMXG00000003475/ENSAMXG00000005056/ENSAMXG00000000394/ENSAMXG00000001913/ENSAMXG00000021373/ENSAMXG00000009007/ENSAMXG00000034017/ENSAMXG00000040507/ENSAMXG00000010933/ENSAMXG00000018776/ENSAMXG00000040618/ENSAMXG00000021163/ENSAMXG00000016577/…	/pgd/hmgcs1/pank1b/mvda/rfk/galnt1/acot19/hk2/fam20b/aclya/ctps1b/aclyb/pank4/alg11/B4GALT1/b4galt7/xylt2/gal3st1a/pigb/gapdhs/h6pd/ngly1/mgat1a/ext1b/g6pd/c1galt1a/eno1a/tmem165/gnpnat1/b4galt5/nus1/b3galt2/
MOLNG-2800	pachon_wild_vs_surface_wild	Down	Biological Process	GO:0031016	pancreas development	11/585	91/9643	0.0213614563998458	0.4235671640426576	0.4130952320331091	11	5.52	11/5.52	ENSAMXG00000037722/ENSAMXG00000009208/ENSAMXG00000004315/ENSAMXG00000032669/ENSAMXG00000011236/ENSAMXG00000025873/ENSAMXG00000001095/ENSAMXG00000020545/ENSAMXG00000016811/ENSAMXG00000005495/ENSAMXG00000010609	klf6a/adamts9/epas1b/srp54/bms1/bhlha15/nkx6.1/jag2b/nav3/ptgs2a/lepr
MOLNG-2800	pachon_wild_vs_surface_wild	Down	Biological Process	GO:0019318	hexose metabolic process	8/585	58/9643	0.0229339658746657	0.4483428821695228	0.4372584153420342	8	3.52	8/3.52	ENSAMXG00000016139/ENSAMXG00000029327/ENSAMXG00000003475/ENSAMXG00000006789/ENSAMXG00000016577/ENSAMXG00000016984/ENSAMXG00000025154/ENSAMXG00000017509	fam3c/pgm2/hk2/man2a1/gapdhs/h6pd/ppp1r3b/g6pd
MOLNG-2800	pachon_wild_vs_surface_wild	Down	Biological Process	GO:0097530	granulocyte migration	5/585	28/9643	0.0248427392375256	0.4641070817003791	0.4526328735527739	5	1.7	5/1.7	ENSAMXG00000032669/ENSAMXG00000014987/ENSAMXG00000013396/ENSAMXG00000037467/ENSAMXG00000025275	srp54/gnb1a/ddx3xb//s1pr4
MOLNG-2800	pachon_wild_vs_surface_wild	Down	Biological Process	GO:1990266	neutrophil migration	5/585	28/9643	0.0248427392375256	0.4641070817003791	0.4526328735527739	5	1.7	5/1.7	ENSAMXG00000032669/ENSAMXG00000014987/ENSAMXG00000013396/ENSAMXG00000037467/ENSAMXG00000025275	srp54/gnb1a/ddx3xb//s1pr4
MOLNG-2800	pachon_wild_vs_surface_wild	Down	Biological Process	GO:0019835	cytolysis	4/585	19/9643	0.0250567563787618	0.4641070817003791	0.4526328735527739	4	1.15	4/1.15	ENSAMXG00000012950/ENSAMXG00000031427/ENSAMXG00000009027/ENSAMXG00000009003	c9//c7b/c6
MOLNG-2800	pachon_wild_vs_surface_wild	Down	Biological Process	GO:0006613	cotranslational protein targeting to membrane	3/585	11/9643	0.02541220332077	0.4641070817003791	0.4526328735527739	3	0.67	3/0.67	ENSAMXG00000032669/ENSAMXG00000010366/ENSAMXG00000042373	srp54/srp9/tram2
MOLNG-2800	pachon_wild_vs_surface_wild	Down	Biological Process	GO:0006614	SRP-dependent cotranslational protein targeting to membrane	3/585	11/9643	0.02541220332077	0.4641070817003791	0.4526328735527739	3	0.67	3/0.67	ENSAMXG00000032669/ENSAMXG00000010366/ENSAMXG00000042373	srp54/srp9/tram2
MOLNG-2800	pachon_wild_vs_surface_wild	Down	Biological Process	GO:0030510	regulation of BMP signaling pathway	5/585	29/9643	0.0285687292340207	0.509474589539504	0.4968787518184455	5	1.76	5/1.76	ENSAMXG00000012966/ENSAMXG00000035355/ENSAMXG00000040246/ENSAMXG00000039952/ENSAMXG00000020968	dab2/slc33a1/fstl1a/b4galt5/ppp4cb
MOLNG-2800	pachon_wild_vs_surface_wild	Down	Biological Process	GO:0043583	ear development	9/585	72/9643	0.0293018012739547	0.509474589539504	0.4968787518184455	9	4.37	9/4.37	ENSAMXG00000017009/ENSAMXG00000019845/ENSAMXG00000034045/ENSAMXG00000002528/ENSAMXG00000000502/ENSAMXG00000030231/ENSAMXG00000043439/ENSAMXG00000039952/ENSAMXG00000010609	ush1c/arf1/lepa/kif3b/stat3/psmd3/cldn7b/b4galt5/lepr
MOLNG-2800	pachon_wild_vs_surface_wild	Down	Biological Process	GO:0048839	inner ear development	9/585	72/9643	0.0293018012739547	0.509474589539504	0.4968787518184455	9	4.37	9/4.37	ENSAMXG00000017009/ENSAMXG00000019845/ENSAMXG00000034045/ENSAMXG00000002528/ENSAMXG00000000502/ENSAMXG00000030231/ENSAMXG00000043439/ENSAMXG00000039952/ENSAMXG00000010609	ush1c/arf1/lepa/kif3b/stat3/psmd3/cldn7b/b4galt5/lepr
MOLNG-2800	pachon_wild_vs_surface_wild	Down	Biological Process	GO:0002088	lens development in camera-type eye	4/585	20/9643	0.0298603229447581	0.509474589539504	0.4968787518184455	4	1.21	4/1.21	ENSAMXG00000031383/ENSAMXG00000005593/ENSAMXG00000021593/ENSAMXG00000014223	inpp5ka/fn1a/uhrf1/psmd6
MOLNG-2800	pachon_wild_vs_surface_wild	Down	Biological Process	GO:0006029	proteoglycan metabolic process	4/585	20/9643	0.0298603229447581	0.509474589539504	0.4968787518184455	4	1.21	4/1.21	ENSAMXG00000005056/ENSAMXG00000018776/ENSAMXG00000021176/ENSAMXG00000039952	fam20b/xylt2/ext1b/b4galt5
MOLNG-2800	pachon_wild_vs_surface_wild	Down	Biological Process	GO:0006913	nucleocytoplasmic transport	7/585	50/9643	0.0300986428978669	0.509474589539504	0.4968787518184455	7	3.03	7/3.03	ENSAMXG00000003069/ENSAMXG00000011854/ENSAMXG00000003669/ENSAMXG00000010246/ENSAMXG00000006908/ENSAMXG00000014246/ENSAMXG00000014184	xpo1a/kpna6/nup93/tnpo2/nup155/kpna4/thoc2
MOLNG-2800	pachon_wild_vs_surface_wild	Down	Biological Process	GO:1901617	organic hydroxy compound biosynthetic process	6/585	40/9643	0.0320750501681315	0.5363875859441765	0.5231263730655324	6	2.43	6/2.43	ENSAMXG00000039120/ENSAMXG00000003563/ENSAMXG00000031770/ENSAMXG00000032738/ENSAMXG00000016393/ENSAMXG00000000632	hmgcs1/mvda/ISYNA1/nus1/sqlea/
MOLNG-2800	pachon_wild_vs_surface_wild	Down	Biological Process	GO:0005996	monosaccharide metabolic process	8/585	62/9643	0.0328086646911313	0.5410668297726992	0.5276899310539143	8	3.76	8/3.76	ENSAMXG00000016139/ENSAMXG00000029327/ENSAMXG00000003475/ENSAMXG00000006789/ENSAMXG00000016577/ENSAMXG00000016984/ENSAMXG00000025154/ENSAMXG00000017509	fam3c/pgm2/hk2/man2a1/gapdhs/h6pd/ppp1r3b/g6pd
MOLNG-2800	pachon_wild_vs_surface_wild	Down	Biological Process	GO:0051169	nuclear transport	7/585	51/9643	0.0331344960595673	0.5410668297726992	0.5276899310539143	7	3.09	7/3.09	ENSAMXG00000003069/ENSAMXG00000011854/ENSAMXG00000003669/ENSAMXG00000010246/ENSAMXG00000006908/ENSAMXG00000014246/ENSAMXG00000014184	xpo1a/kpna6/nup93/tnpo2/nup155/kpna4/thoc2
MOLNG-2800	pachon_wild_vs_surface_wild	Down	Biological Process	GO:0009100	glycoprotein metabolic process	14/585	135/9643	0.0342112451788763	0.5521535849800046	0.5385025862917381	14	8.19	14/8.19	ENSAMXG00000020985/ENSAMXG00000005056/ENSAMXG00000034017/ENSAMXG00000040507/ENSAMXG00000010933/ENSAMXG00000018776/ENSAMXG00000010851/ENSAMXG00000043888/ENSAMXG00000021176/ENSAMXG00000013071/ENSAMXG00000002811/ENSAMXG00000039952/ENSAMXG00000032738/ENSAMXG00000025815	galnt1/fam20b/alg11/B4GALT1/b4galt7/xylt2/ngly1/mgat1a/ext1b/c1galt1a/tmem165/b4galt5/nus1/b3galt2
MOLNG-2800	pachon_wild_vs_surface_wild	Down	Biological Process	GO:0019216	regulation of lipid metabolic process	4/585	21/9643	0.0351703765405842	0.561108995842885	0.5472365908190128	4	1.27	4/1.27	ENSAMXG00000008399/ENSAMXG00000009714/ENSAMXG00000004967/ENSAMXG00000034523	rcor1/pik3r5/noc3l/ormdl2
MOLNG-2800	pachon_wild_vs_surface_wild	Down	Biological Process	GO:0002455	humoral immune response mediated by circulating immunoglobulin	3/585	13/9643	0.0402530332411303	0.5943745759434987	0.579679739620309	3	0.79	3/0.79	ENSAMXG00000012950/ENSAMXG00000009027/ENSAMXG00000009003	c9/c7b/c6
MOLNG-2800	pachon_wild_vs_surface_wild	Down	Biological Process	GO:0006958	complement activation, classical pathway	3/585	13/9643	0.0402530332411303	0.5943745759434987	0.579679739620309	3	0.79	3/0.79	ENSAMXG00000012950/ENSAMXG00000009027/ENSAMXG00000009003	c9/c7b/c6
MOLNG-2800	pachon_wild_vs_surface_wild	Down	Biological Process	GO:0016064	immunoglobulin mediated immune response	3/585	13/9643	0.0402530332411303	0.5943745759434987	0.579679739620309	3	0.79	3/0.79	ENSAMXG00000012950/ENSAMXG00000009027/ENSAMXG00000009003	c9/c7b/c6
MOLNG-2800	pachon_wild_vs_surface_wild	Down	Biological Process	GO:0019724	B cell mediated immunity	3/585	13/9643	0.0402530332411303	0.5943745759434987	0.579679739620309	3	0.79	3/0.79	ENSAMXG00000012950/ENSAMXG00000009027/ENSAMXG00000009003	c9/c7b/c6
MOLNG-2800	pachon_wild_vs_surface_wild	Down	Biological Process	GO:0043044	ATP-dependent chromatin remodeling	3/585	13/9643	0.0402530332411303	0.5943745759434987	0.579679739620309	3	0.79	3/0.79	ENSAMXG00000010545/ENSAMXG00000031036/ENSAMXG00000021023	smarcc1a/znhit1/smarca4a
MOLNG-2800	pachon_wild_vs_surface_wild	Down	Biological Process	GO:0045047	protein targeting to ER	3/585	13/9643	0.0402530332411303	0.5943745759434987	0.579679739620309	3	0.79	3/0.79	ENSAMXG00000032669/ENSAMXG00000010366/ENSAMXG00000042373	srp54/srp9/tram2
MOLNG-2800	pachon_wild_vs_surface_wild	Down	Biological Process	GO:0072599	establishment of protein localization to endoplasmic reticulum	3/585	13/9643	0.0402530332411303	0.5943745759434987	0.579679739620309	3	0.79	3/0.79	ENSAMXG00000032669/ENSAMXG00000010366/ENSAMXG00000042373	srp54/srp9/tram2
MOLNG-2800	pachon_wild_vs_surface_wild	Down	Biological Process	GO:0031017	exocrine pancreas development	5/585	32/9643	0.0417843918051494	0.597904493046881	0.5831223859080003	5	1.94	5/1.94	ENSAMXG00000004315/ENSAMXG00000032669/ENSAMXG00000025873/ENSAMXG00000020545/ENSAMXG00000005495	epas1b/srp54/bhlha15/jag2b/ptgs2a
MOLNG-2800	pachon_wild_vs_surface_wild	Down	Biological Process	GO:0035272	exocrine system development	5/585	32/9643	0.0417843918051494	0.597904493046881	0.5831223859080003	5	1.94	5/1.94	ENSAMXG00000004315/ENSAMXG00000032669/ENSAMXG00000025873/ENSAMXG00000020545/ENSAMXG00000005495	epas1b/srp54/bhlha15/jag2b/ptgs2a
MOLNG-2800	pachon_wild_vs_surface_wild	Down	Biological Process	GO:0043161	proteasome-mediated ubiquitin-dependent protein catabolic process	5/585	32/9643	0.0417843918051494	0.597904493046881	0.5831223859080003	5	1.94	5/1.94	ENSAMXG00000021634/ENSAMXG00000003562/ENSAMXG00000005901/ENSAMXG00000003339/ENSAMXG00000014223	rad23ab/rad23aa/fbxo4/syvn1/psmd6
MOLNG-2800	pachon_wild_vs_surface_wild	Down	Biological Process	GO:0009101	glycoprotein biosynthetic process	13/585	128/9643	0.0464520193748384	0.6503595391207402	0.6342805758450416	13	7.77	13/7.77	ENSAMXG00000020985/ENSAMXG00000005056/ENSAMXG00000034017/ENSAMXG00000040507/ENSAMXG00000010933/ENSAMXG00000018776/ENSAMXG00000043888/ENSAMXG00000021176/ENSAMXG00000013071/ENSAMXG00000002811/ENSAMXG00000039952/ENSAMXG00000032738/ENSAMXG00000025815	galnt1/fam20b/alg11/B4GALT1/b4galt7/xylt2/mgat1a/ext1b/c1galt1a/tmem165/b4galt5/nus1/b3galt2
MOLNG-2800	pachon_wild_vs_surface_wild	Down	Biological Process	GO:0097529	myeloid leukocyte migration	5/585	33/9643	0.0468861976307135	0.6503595391207402	0.6342805758450416	5	2.0	5/2	ENSAMXG00000032669/ENSAMXG00000014987/ENSAMXG00000013396/ENSAMXG00000037467/ENSAMXG00000025275	srp54/gnb1a/ddx3xb//s1pr4
MOLNG-2800	pachon_wild_vs_surface_wild	Down	Biological Process	GO:0030593	neutrophil chemotaxis	4/585	23/9643	0.0473244333221864	0.6503595391207402	0.6342805758450416	4	1.4	4/1.4	ENSAMXG00000032669/ENSAMXG00000013396/ENSAMXG00000037467/ENSAMXG00000025275	srp54/ddx3xb//s1pr4
MOLNG-2800	pachon_wild_vs_surface_wild	Down	Biological Process	GO:0071621	granulocyte chemotaxis	4/585	23/9643	0.0473244333221864	0.6503595391207402	0.6342805758450416	4	1.4	4/1.4	ENSAMXG00000032669/ENSAMXG00000013396/ENSAMXG00000037467/ENSAMXG00000025275	srp54/ddx3xb//s1pr4
MOLNG-2800	pachon_wild_vs_surface_wild	Down	Biological Process	GO:0009066	aspartate family amino acid metabolic process	3/585	14/9643	0.0489863512572133	0.6665985837746282	0.6501181394920158	3	0.85	3/0.85	ENSAMXG00000029843/ENSAMXG00000039240/ENSAMXG00000035139	asns/asns/asdurf
MOLNG-2583	pachonfedmuscle_VS_surfacefedmuscle	UP	Cellular Components	GO:0015629	actin cytoskeleton	7/130	146/10711	0.0019810445016452	0.1558019781641953	0.1459618532275093	7	1.77	7/1.77	ENSAMXG00000033131/ENSAMXG00000001452/ENSAMXG00000034762/ENSAMXG00000021263/ENSAMXG00000002239/ENSAMXG00000004694/ENSAMXG00000042771	/tnnt2d/arpc5la/sptbn4b/myhb/si:ch73-194h10.2/
MOLNG-2583	pachonfedmuscle_VS_surfacefedmuscle	UP	Cellular Components	GO:0005882	intermediate filament	4/130	55/10711	0.0043807189255559	0.1558019781641953	0.1459618532275093	4	0.67	4/0.67	ENSAMXG00000017309/ENSAMXG00000029377/ENSAMXG00000011000/ENSAMXG00000018712	usp11/krtt1c19e/sync/nes
MOLNG-2583	pachonfedmuscle_VS_surfacefedmuscle	UP	Cellular Components	GO:0045111	intermediate filament cytoskeleton	4/130	56/10711	0.0046740593449258	0.1558019781641953	0.1459618532275093	4	0.68	4/0.68	ENSAMXG00000017309/ENSAMXG00000029377/ENSAMXG00000011000/ENSAMXG00000018712	usp11/krtt1c19e/sync/nes
MOLNG-2583	pachonfedmuscle_VS_surfacefedmuscle	UP	Cellular Components	GO:0016459	myosin complex	4/130	69/10711	0.0097526938641491	0.2438173466037294	0.2284183562919149	4	0.84	4/0.84	ENSAMXG00000033131/ENSAMXG00000002239/ENSAMXG00000004694/ENSAMXG00000042771	/myhb/si:ch73-194h10.2/
MOLNG-2583	pachonfedmuscle_VS_surfacefedmuscle	UP	Cellular Components	GO:0005891	voltage-gated calcium channel complex	2/130	21/10711	0.026404711865066	0.4090275123990697	0.3831941958264968	2	0.25	2/0.25	ENSAMXG00000012714/ENSAMXG00000013243	cacna1bb/cacnb2b
MOLNG-2583	pachonfedmuscle_VS_surfacefedmuscle	UP	Cellular Components	GO:0034704	calcium channel complex	2/130	23/10711	0.0313157763747674	0.4090275123990697	0.3831941958264968	2	0.28	2/0.28	ENSAMXG00000012714/ENSAMXG00000013243	cacna1bb/cacnb2b
MOLNG-2583	pachonfedmuscle_VS_surfacefedmuscle	UP	Cellular Components	GO:0099081	supramolecular polymer	7/130	251/10711	0.0331436940241633	0.4090275123990697	0.3831941958264968	7	3.05	7/3.05	ENSAMXG00000017309/ENSAMXG00000001452/ENSAMXG00000003649/ENSAMXG00000029377/ENSAMXG00000011000/ENSAMXG00000018712/ENSAMXG00000033008	usp11/tnnt2d/lmod2b/krtt1c19e/sync/nes/zgc:55461
MOLNG-2583	pachonfedmuscle_VS_surfacefedmuscle	UP	Cellular Components	GO:0099512	supramolecular fiber	7/130	251/10711	0.0331436940241633	0.4090275123990697	0.3831941958264968	7	3.05	7/3.05	ENSAMXG00000017309/ENSAMXG00000001452/ENSAMXG00000003649/ENSAMXG00000029377/ENSAMXG00000011000/ENSAMXG00000018712/ENSAMXG00000033008	usp11/tnnt2d/lmod2b/krtt1c19e/sync/nes/zgc:55461
MOLNG-2583	pachonfedmuscle_VS_surfacefedmuscle	UP	Cellular Components	GO:0030660	Golgi-associated vesicle membrane	2/130	27/10711	0.0421067339286148	0.4090275123990697	0.3831941958264968	2	0.33	2/0.33	ENSAMXG00000029385/ENSAMXG00000011030	clta/si:dkey-9k7.3
MOLNG-2583	pachonfedmuscle_VS_surfacefedmuscle	UP	Cellular Components	GO:0005798	Golgi-associated vesicle	2/130	28/10711	0.0449930263638976	0.4090275123990697	0.3831941958264968	2	0.34	2/0.34	ENSAMXG00000029385/ENSAMXG00000011030	clta/si:dkey-9k7.3
MOLNG-2583	pachonfedmuscle_VS_surfacefedmuscle	UP	Cellular Components	GO:0030120	vesicle coat	2/130	28/10711	0.0449930263638976	0.4090275123990697	0.3831941958264968	2	0.34	2/0.34	ENSAMXG00000029385/ENSAMXG00000011030	clta/si:dkey-9k7.3
MOLNG-2583	pachonfedmuscle_VS_surfacefedmuscle	UP	Molecular Functions	GO:0016779	nucleotidyltransferase activity	8/183	108/13591	0.00010367712018676552	0.0224206131497906	0.0204606453863008	8	1.45	8/1.45	ENSAMXG00000039114/ENSAMXG00000040932/ENSAMXG00000031305/ENSAMXG00000017691/ENSAMXG00000038578/ENSAMXG00000011503/ENSAMXG00000038047/ENSAMXG00000037247	///tent4a//uap1//
MOLNG-2583	pachonfedmuscle_VS_surfacefedmuscle	UP	Molecular Functions	GO:0003964	RNA-directed DNA polymerase activity	4/183	22/13591	0.00019245161501966183	0.0224206131497906	0.0204606453863008	4	0.3	4/0.3	ENSAMXG00000039114/ENSAMXG00000031305/ENSAMXG00000038578/ENSAMXG00000037247	///
MOLNG-2583	pachonfedmuscle_VS_surfacefedmuscle	UP	Molecular Functions	GO:0034061	DNA polymerase activity	4/183	33/13591	0.0009591554451878252	0.074494406242921	0.0679822455887511	4	0.44	4/0.44	ENSAMXG00000039114/ENSAMXG00000031305/ENSAMXG00000038578/ENSAMXG00000037247	///
MOLNG-2583	pachonfedmuscle_VS_surfacefedmuscle	UP	Molecular Functions	GO:0016891	endoribonuclease activity, producing 5'-phosphomonoesters	3/183	20/13591	0.0023125732421767	0.1347073913567951	0.1229315249788688	3	0.27	3/0.27	ENSAMXG00000040932/ENSAMXG00000038483/ENSAMXG00000038047	//
MOLNG-2583	pachonfedmuscle_VS_surfacefedmuscle	UP	Molecular Functions	GO:0016893	endonuclease activity, active with either ribo- or deoxyribonucleic acids and producing 5'-phosphomonoesters	3/183	23/13591	0.0034877633135354	0.1625297704107529	0.1483217240703505	3	0.31	3/0.31	ENSAMXG00000040932/ENSAMXG00000038483/ENSAMXG00000038047	//
MOLNG-2583	pachonfedmuscle_VS_surfacefedmuscle	UP	Molecular Functions	GO:0000287	magnesium ion binding	5/183	86/13591	0.0060585245069844	0.2352727016878965	0.2147056053352387	5	1.16	5/1.16	ENSAMXG00000035086/ENSAMXG00000017689/ENSAMXG00000014374/ENSAMXG00000043495/ENSAMXG00000020349	ppa1a/atp8b3/map3k7/eno3/ppm1na
MOLNG-2583	pachonfedmuscle_VS_surfacefedmuscle	UP	Molecular Functions	GO:0004521	endoribonuclease activity	3/183	32/13591	0.0089407806765346	0.2932823943106131	0.2676441999130059	3	0.43	3/0.43	ENSAMXG00000040932/ENSAMXG00000038483/ENSAMXG00000038047	//
MOLNG-2583	pachonfedmuscle_VS_surfacefedmuscle	UP	Molecular Functions	GO:0051015	actin filament binding	5/183	99/13591	0.0108265480162267	0.2932823943106131	0.2676441999130059	5	1.33	5/1.33	ENSAMXG00000033131/ENSAMXG00000002239/ENSAMXG00000004694/ENSAMXG00000042771/ENSAMXG00000039303	/myhb/si:ch73-194h10.2//syne2b
MOLNG-2583	pachonfedmuscle_VS_surfacefedmuscle	UP	Molecular Functions	GO:0044877	protein-containing complex binding	7/183	188/13591	0.013729806450706	0.2932823943106131	0.2676441999130059	7	2.53	7/2.53	ENSAMXG00000005024/ENSAMXG00000033131/ENSAMXG00000002239/ENSAMXG00000004694/ENSAMXG00000018712/ENSAMXG00000042771/ENSAMXG00000039303	nisch//myhb/si:ch73-194h10.2/nes//syne2b
MOLNG-2583	pachonfedmuscle_VS_surfacefedmuscle	UP	Molecular Functions	GO:0051213	dioxygenase activity	4/183	70/13591	0.0146326398698572	0.2932823943106131	0.2676441999130059	4	0.94	4/0.94	ENSAMXG00000006257/ENSAMXG00000015913/ENSAMXG00000033850/ENSAMXG00000002237	bbox1/hpda/plod2/p4htm
MOLNG-2583	pachonfedmuscle_VS_surfacefedmuscle	UP	Molecular Functions	GO:0016836	hydro-lyase activity	3/183	40/13591	0.0164695295058356	0.2932823943106131	0.2676441999130059	3	0.54	3/0.54	ENSAMXG00000001804/ENSAMXG00000036060/ENSAMXG00000043495	hadhaa/ca14/eno3
MOLNG-2583	pachonfedmuscle_VS_surfacefedmuscle	UP	Molecular Functions	GO:0005217	intracellular ligand-gated ion channel activity	2/183	15/13591	0.0168736591058986	0.2932823943106131	0.2676441999130059	2	0.2	2/0.2	ENSAMXG00000035630/ENSAMXG00000000107	cnga3a/cngb3.2
MOLNG-2583	pachonfedmuscle_VS_surfacefedmuscle	UP	Molecular Functions	GO:0004866	endopeptidase inhibitor activity	4/183	74/13591	0.017622118113084	0.2932823943106131	0.2676441999130059	4	1.0	4/1	ENSAMXG00000010565/ENSAMXG00000031127/ENSAMXG00000010569/ENSAMXG00000021415	///igf1rb
MOLNG-2583	pachonfedmuscle_VS_surfacefedmuscle	UP	Molecular Functions	GO:0061135	endopeptidase regulator activity	4/183	74/13591	0.017622118113084	0.2932823943106131	0.2676441999130059	4	1.0	4/1	ENSAMXG00000010565/ENSAMXG00000031127/ENSAMXG00000010569/ENSAMXG00000021415	///igf1rb
MOLNG-2583	pachonfedmuscle_VS_surfacefedmuscle	UP	Molecular Functions	GO:0030414	peptidase inhibitor activity	4/183	81/13591	0.0237139549313271	0.3107051992939129	0.2835439361073882	4	1.09	4/1.09	ENSAMXG00000010565/ENSAMXG00000031127/ENSAMXG00000010569/ENSAMXG00000021415	///igf1rb
MOLNG-2583	pachonfedmuscle_VS_surfacefedmuscle	UP	Molecular Functions	GO:0016835	carbon-oxygen lyase activity	3/183	46/13591	0.0238693981646591	0.3107051992939129	0.2835439361073882	3	0.62	3/0.62	ENSAMXG00000001804/ENSAMXG00000036060/ENSAMXG00000043495	hadhaa/ca14/eno3
MOLNG-2583	pachonfedmuscle_VS_surfacefedmuscle	UP	Molecular Functions	GO:0031418	L-ascorbic acid binding	2/183	18/13591	0.023947870384715	0.3107051992939129	0.2835439361073882	2	0.24	2/0.24	ENSAMXG00000033850/ENSAMXG00000002237	plod2/p4htm
MOLNG-2583	pachonfedmuscle_VS_surfacefedmuscle	UP	Molecular Functions	GO:0030246	carbohydrate binding	5/183	122/13591	0.0245694278870155	0.3107051992939129	0.2835439361073882	5	1.64	5/1.64	ENSAMXG00000013975/ENSAMXG00000033850/ENSAMXG00000015727/ENSAMXG00000008561/ENSAMXG00000002237	si:ch73-12o23.1/plod2//vcanb/p4htm
MOLNG-2583	pachonfedmuscle_VS_surfacefedmuscle	UP	Molecular Functions	GO:0003779	actin binding	9/183	312/13591	0.0255042642023425	0.3107051992939129	0.2835439361073882	9	4.2	9/4.2	ENSAMXG00000033131/ENSAMXG00000003649/ENSAMXG00000004579/ENSAMXG00000021263/ENSAMXG00000043926/ENSAMXG00000002239/ENSAMXG00000004694/ENSAMXG00000042771/ENSAMXG00000039303	/lmod2b//sptbn4b//myhb/si:ch73-194h10.2//syne2b
MOLNG-2583	pachonfedmuscle_VS_surfacefedmuscle	UP	Molecular Functions	GO:0061134	peptidase regulator activity	4/183	84/13591	0.0266699741883187	0.3107051992939129	0.2835439361073882	4	1.13	4/1.13	ENSAMXG00000010565/ENSAMXG00000031127/ENSAMXG00000010569/ENSAMXG00000021415	///igf1rb
MOLNG-2583	pachonfedmuscle_VS_surfacefedmuscle	UP	Molecular Functions	GO:0140097	catalytic activity, acting on DNA	5/183	128/13591	0.0294300625732219	0.3139895770688449	0.2865411997646563	5	1.72	5/1.72	ENSAMXG00000039114/ENSAMXG00000031305/ENSAMXG00000038578/ENSAMXG00000010066/ENSAMXG00000037247	///wrn/
MOLNG-2583	pachonfedmuscle_VS_surfacefedmuscle	UP	Molecular Functions	GO:0004540	ribonuclease activity	3/183	50/13591	0.0296470845301055	0.3139895770688449	0.2865411997646563	3	0.67	3/0.67	ENSAMXG00000040932/ENSAMXG00000038483/ENSAMXG00000038047	//
MOLNG-2583	pachonfedmuscle_VS_surfacefedmuscle	UP	Molecular Functions	GO:0042626	ATPase-coupled transmembrane transporter activity	4/183	89/13591	0.0320675758994158	0.3179080043541927	0.2901170855186217	4	1.2	4/1.2	ENSAMXG00000032430/ENSAMXG00000036660/ENSAMXG00000038083/ENSAMXG00000012162	///atp1a1a.3
MOLNG-2583	pachonfedmuscle_VS_surfacefedmuscle	UP	Molecular Functions	GO:0004857	enzyme inhibitor activity	5/183	133/13591	0.0339142660665212	0.3179080043541927	0.2901170855186217	5	1.79	5/1.79	ENSAMXG00000010565/ENSAMXG00000031127/ENSAMXG00000010569/ENSAMXG00000021415/ENSAMXG00000040235	///igf1rb/inka1b
MOLNG-2583	pachonfedmuscle_VS_surfacefedmuscle	UP	Molecular Functions	GO:0015399	primary active transmembrane transporter activity	4/183	93/13591	0.0368144443993634	0.3179080043541927	0.2901170855186217	4	1.25	4/1.25	ENSAMXG00000032430/ENSAMXG00000036660/ENSAMXG00000038083/ENSAMXG00000012162	///atp1a1a.3
MOLNG-2583	pachonfedmuscle_VS_surfacefedmuscle	UP	Molecular Functions	GO:0003774	motor activity	5/183	137/13591	0.0377916209772657	0.3179080043541927	0.2901170855186217	5	1.84	5/1.84	ENSAMXG00000033131/ENSAMXG00000002239/ENSAMXG00000004694/ENSAMXG00000042771/ENSAMXG00000033559	/myhb/si:ch73-194h10.2//
MOLNG-2583	pachonfedmuscle_VS_surfacefedmuscle	UP	Molecular Functions	GO:0016706	2-oxoglutarate-dependent dioxygenase activity	2/183	23/13591	0.0379059505530042	0.3179080043541927	0.2901170855186217	2	0.31	2/0.31	ENSAMXG00000006257/ENSAMXG00000033850	bbox1/plod2
MOLNG-2583	pachonfedmuscle_VS_surfacefedmuscle	UP	Molecular Functions	GO:0031406	carboxylic acid binding	3/183	56/13591	0.0395679490397922	0.3179080043541927	0.2901170855186217	3	0.75	3/0.75	ENSAMXG00000033850/ENSAMXG00000008561/ENSAMXG00000002237	plod2/vcanb/p4htm
MOLNG-2583	pachonfedmuscle_VS_surfacefedmuscle	UP	Molecular Functions	GO:0043177	organic acid binding	3/183	56/13591	0.0395679490397922	0.3179080043541927	0.2901170855186217	3	0.75	3/0.75	ENSAMXG00000033850/ENSAMXG00000008561/ENSAMXG00000002237	plod2/vcanb/p4htm
MOLNG-2583	pachonfedmuscle_VS_surfacefedmuscle	UP	Molecular Functions	GO:0005245	voltage-gated calcium channel activity	2/183	24/13591	0.0409931361271812	0.3183800239211078	0.2905478420242322	2	0.32	2/0.32	ENSAMXG00000012714/ENSAMXG00000013243	cacna1bb/cacnb2b
MOLNG-2583	pachonfedmuscle_VS_surfacefedmuscle	UP	Molecular Functions	GO:0048029	monosaccharide binding	2/183	26/13591	0.0474382637802738	0.3565521116388328	0.3253829977458515	2	0.35	2/0.35	ENSAMXG00000033850/ENSAMXG00000002237	plod2/p4htm
MOLNG-2583	pachonfedmuscle_VS_surfacefedmuscle	UP	Biological Process	GO:0015074	DNA integration	19/148	86/11822	5.875416047799272e-19	4.148043729746285e-16	4.020021506388976e-16	19	1.08	19/1.08	ENSAMXG00000036506/ENSAMXG00000039114/ENSAMXG00000035494/ENSAMXG00000040932/ENSAMXG00000031305/ENSAMXG00000033138/ENSAMXG00000040613/ENSAMXG00000038483/ENSAMXG00000031715/ENSAMXG00000043821/ENSAMXG00000038578/ENSAMXG00000037931/ENSAMXG00000041546/ENSAMXG00000041081/ENSAMXG00000040885/ENSAMXG00000038047/ENSAMXG00000030022/ENSAMXG00000038199/ENSAMXG00000035834	//////////////////
MOLNG-2583	pachonfedmuscle_VS_surfacefedmuscle	UP	Biological Process	GO:0006259	DNA metabolic process	21/148	344/11822	1.724788382587532e-09	6.088502990533988e-07	5.900591835167873e-07	21	4.31	21/4.31	ENSAMXG00000036506/ENSAMXG00000039114/ENSAMXG00000035494/ENSAMXG00000040932/ENSAMXG00000031305/ENSAMXG00000033138/ENSAMXG00000040613/ENSAMXG00000038483/ENSAMXG00000031715/ENSAMXG00000043821/ENSAMXG00000038578/ENSAMXG00000037931/ENSAMXG00000010066/ENSAMXG00000041546/ENSAMXG00000041081/ENSAMXG00000040885/ENSAMXG00000038047/ENSAMXG00000030022/ENSAMXG00000038199/ENSAMXG00000035834/ENSAMXG00000037247	////////////wrn////////
MOLNG-2583	pachonfedmuscle_VS_surfacefedmuscle	UP	Biological Process	GO:0006278	RNA-dependent DNA biosynthetic process	4/148	26/11822	0.0002845427200874537	0.0669623867939141	0.064895708090121	4	0.33	4/0.33	ENSAMXG00000039114/ENSAMXG00000031305/ENSAMXG00000038578/ENSAMXG00000037247	///
MOLNG-2583	pachonfedmuscle_VS_surfacefedmuscle	UP	Biological Process	GO:0071897	DNA biosynthetic process	4/148	47/11822	0.0027701347631933	0.3980394890221377	0.3857546859466073	4	0.59	4/0.59	ENSAMXG00000039114/ENSAMXG00000031305/ENSAMXG00000038578/ENSAMXG00000037247	///
MOLNG-2583	pachonfedmuscle_VS_surfacefedmuscle	UP	Biological Process	GO:0051693	actin filament capping	3/148	27/11822	0.0045120263505093	0.3980394890221377	0.3857546859466073	3	0.34	3/0.34	ENSAMXG00000003649/ENSAMXG00000021263/ENSAMXG00000043926	lmod2b/sptbn4b/
MOLNG-2583	pachonfedmuscle_VS_surfacefedmuscle	UP	Biological Process	GO:0030834	regulation of actin filament depolymerization	3/148	28/11822	0.0050076056631293	0.3980394890221377	0.3857546859466073	3	0.35	3/0.35	ENSAMXG00000003649/ENSAMXG00000021263/ENSAMXG00000043926	lmod2b/sptbn4b/
MOLNG-2583	pachonfedmuscle_VS_surfacefedmuscle	UP	Biological Process	GO:0030835	negative regulation of actin filament depolymerization	3/148	28/11822	0.0050076056631293	0.3980394890221377	0.3857546859466073	3	0.35	3/0.35	ENSAMXG00000003649/ENSAMXG00000021263/ENSAMXG00000043926	lmod2b/sptbn4b/
MOLNG-2583	pachonfedmuscle_VS_surfacefedmuscle	UP	Biological Process	GO:0043242	negative regulation of protein-containing complex disassembly	3/148	29/11822	0.0055347449371928	0.3980394890221377	0.3857546859466073	3	0.36	3/0.36	ENSAMXG00000003649/ENSAMXG00000021263/ENSAMXG00000043926	lmod2b/sptbn4b/
MOLNG-2583	pachonfedmuscle_VS_surfacefedmuscle	UP	Biological Process	GO:1901880	negative regulation of protein depolymerization	3/148	29/11822	0.0055347449371928	0.3980394890221377	0.3857546859466073	3	0.36	3/0.36	ENSAMXG00000003649/ENSAMXG00000021263/ENSAMXG00000043926	lmod2b/sptbn4b/
MOLNG-2583	pachonfedmuscle_VS_surfacefedmuscle	UP	Biological Process	GO:1901879	regulation of protein depolymerization	3/148	31/11822	0.0066857721540647	0.3980394890221377	0.3857546859466073	3	0.39	3/0.39	ENSAMXG00000003649/ENSAMXG00000021263/ENSAMXG00000043926	lmod2b/sptbn4b/
MOLNG-2583	pachonfedmuscle_VS_surfacefedmuscle	UP	Biological Process	GO:0022411	cellular component disassembly	4/148	62/11822	0.0075000222173134	0.3980394890221377	0.3857546859466073	4	0.78	4/0.78	ENSAMXG00000003649/ENSAMXG00000014097/ENSAMXG00000021263/ENSAMXG00000043926	lmod2b/atg7/sptbn4b/
MOLNG-2583	pachonfedmuscle_VS_surfacefedmuscle	UP	Biological Process	GO:0030042	actin filament depolymerization	3/148	33/11822	0.0079689038819774	0.3980394890221377	0.3857546859466073	3	0.41	3/0.41	ENSAMXG00000003649/ENSAMXG00000021263/ENSAMXG00000043926	lmod2b/sptbn4b/
MOLNG-2583	pachonfedmuscle_VS_surfacefedmuscle	UP	Biological Process	GO:0090502	RNA phosphodiester bond hydrolysis, endonucleolytic	3/148	33/11822	0.0079689038819774	0.3980394890221377	0.3857546859466073	3	0.41	3/0.41	ENSAMXG00000040932/ENSAMXG00000038483/ENSAMXG00000038047	//
MOLNG-2583	pachonfedmuscle_VS_surfacefedmuscle	UP	Biological Process	GO:0030837	negative regulation of actin filament polymerization	3/148	35/11822	0.0093874107322276	0.3980394890221377	0.3857546859466073	3	0.44	3/0.44	ENSAMXG00000003649/ENSAMXG00000021263/ENSAMXG00000043926	lmod2b/sptbn4b/
MOLNG-2583	pachonfedmuscle_VS_surfacefedmuscle	UP	Biological Process	GO:0032272	negative regulation of protein polymerization	3/148	35/11822	0.0093874107322276	0.3980394890221377	0.3857546859466073	3	0.44	3/0.44	ENSAMXG00000003649/ENSAMXG00000021263/ENSAMXG00000043926	lmod2b/sptbn4b/
MOLNG-2583	pachonfedmuscle_VS_surfacefedmuscle	UP	Biological Process	GO:0031333	negative regulation of protein-containing complex assembly	3/148	36/11822	0.0101483155841338	0.3980394890221377	0.3857546859466073	3	0.45	3/0.45	ENSAMXG00000003649/ENSAMXG00000021263/ENSAMXG00000043926	lmod2b/sptbn4b/
MOLNG-2583	pachonfedmuscle_VS_surfacefedmuscle	UP	Biological Process	GO:0043244	regulation of protein-containing complex disassembly	3/148	36/11822	0.0101483155841338	0.3980394890221377	0.3857546859466073	3	0.45	3/0.45	ENSAMXG00000003649/ENSAMXG00000021263/ENSAMXG00000043926	lmod2b/sptbn4b/
MOLNG-2583	pachonfedmuscle_VS_surfacefedmuscle	UP	Biological Process	GO:0051261	protein depolymerization	3/148	36/11822	0.0101483155841338	0.3980394890221377	0.3857546859466073	3	0.45	3/0.45	ENSAMXG00000003649/ENSAMXG00000021263/ENSAMXG00000043926	lmod2b/sptbn4b/
MOLNG-2583	pachonfedmuscle_VS_surfacefedmuscle	UP	Biological Process	GO:1902904	negative regulation of supramolecular fiber organization	3/148	40/11822	0.0135430115181113	0.486824735660233	0.4717997289088288	3	0.5	3/0.5	ENSAMXG00000003649/ENSAMXG00000021263/ENSAMXG00000043926	lmod2b/sptbn4b/
MOLNG-2583	pachonfedmuscle_VS_surfacefedmuscle	UP	Biological Process	GO:0010951	negative regulation of endopeptidase activity	4/148	75/11822	0.0144313282955024	0.486824735660233	0.4717997289088288	4	0.94	4/0.94	ENSAMXG00000010565/ENSAMXG00000031127/ENSAMXG00000010569/ENSAMXG00000021415	///igf1rb
MOLNG-2583	pachonfedmuscle_VS_surfacefedmuscle	UP	Biological Process	GO:0051494	negative regulation of cytoskeleton organization	3/148	41/11822	0.0144806224488171	0.486824735660233	0.4717997289088288	3	0.51	3/0.51	ENSAMXG00000003649/ENSAMXG00000021263/ENSAMXG00000043926	lmod2b/sptbn4b/
MOLNG-2583	pachonfedmuscle_VS_surfacefedmuscle	UP	Biological Process	GO:0032535	regulation of cellular component size	5/148	121/11822	0.017932435752931	0.4908424570182992	0.4756934502190167	5	1.51	5/1.51	ENSAMXG00000011972/ENSAMXG00000034762/ENSAMXG00000003649/ENSAMXG00000021263/ENSAMXG00000043926	slc12a7b/arpc5la/lmod2b/sptbn4b/
MOLNG-2583	pachonfedmuscle_VS_surfacefedmuscle	UP	Biological Process	GO:0010466	negative regulation of peptidase activity	4/148	81/11822	0.0186569678219253	0.4908424570182992	0.4756934502190167	4	1.01	4/1.01	ENSAMXG00000010565/ENSAMXG00000031127/ENSAMXG00000010569/ENSAMXG00000021415	///igf1rb
MOLNG-2583	pachonfedmuscle_VS_surfacefedmuscle	UP	Biological Process	GO:0045861	negative regulation of proteolysis	4/148	81/11822	0.0186569678219253	0.4908424570182992	0.4756934502190167	4	1.01	4/1.01	ENSAMXG00000010565/ENSAMXG00000031127/ENSAMXG00000010569/ENSAMXG00000021415	///igf1rb
MOLNG-2583	pachonfedmuscle_VS_surfacefedmuscle	UP	Biological Process	GO:0007601	visual perception	3/148	47/11822	0.0208655043938383	0.4908424570182992	0.4756934502190167	3	0.59	3/0.59	ENSAMXG00000035630/ENSAMXG00000035849/ENSAMXG00000000107	cnga3a/pdca/cngb3.2
MOLNG-2583	pachonfedmuscle_VS_surfacefedmuscle	UP	Biological Process	GO:0043624	cellular protein complex disassembly	3/148	47/11822	0.0208655043938383	0.4908424570182992	0.4756934502190167	3	0.59	3/0.59	ENSAMXG00000003649/ENSAMXG00000021263/ENSAMXG00000043926	lmod2b/sptbn4b/
MOLNG-2583	pachonfedmuscle_VS_surfacefedmuscle	UP	Biological Process	GO:0030833	regulation of actin filament polymerization	4/148	85/11822	0.0218588836397181	0.4908424570182992	0.4756934502190167	4	1.06	4/1.06	ENSAMXG00000034762/ENSAMXG00000003649/ENSAMXG00000021263/ENSAMXG00000043926	arpc5la/lmod2b/sptbn4b/
MOLNG-2583	pachonfedmuscle_VS_surfacefedmuscle	UP	Biological Process	GO:0032271	regulation of protein polymerization	4/148	85/11822	0.0218588836397181	0.4908424570182992	0.4756934502190167	4	1.06	4/1.06	ENSAMXG00000034762/ENSAMXG00000003649/ENSAMXG00000021263/ENSAMXG00000043926	arpc5la/lmod2b/sptbn4b/
MOLNG-2583	pachonfedmuscle_VS_surfacefedmuscle	UP	Biological Process	GO:0050953	sensory perception of light stimulus	3/148	48/11822	0.0220570070056113	0.4908424570182992	0.4756934502190167	3	0.6	3/0.6	ENSAMXG00000035630/ENSAMXG00000035849/ENSAMXG00000000107	cnga3a/pdca/cngb3.2
MOLNG-2583	pachonfedmuscle_VS_surfacefedmuscle	UP	Biological Process	GO:0008064	regulation of actin polymerization or depolymerization	4/148	86/11822	0.0227086056207695	0.4908424570182992	0.4756934502190167	4	1.08	4/1.08	ENSAMXG00000034762/ENSAMXG00000003649/ENSAMXG00000021263/ENSAMXG00000043926	arpc5la/lmod2b/sptbn4b/
MOLNG-2583	pachonfedmuscle_VS_surfacefedmuscle	UP	Biological Process	GO:0030832	regulation of actin filament length	4/148	86/11822	0.0227086056207695	0.4908424570182992	0.4756934502190167	4	1.08	4/1.08	ENSAMXG00000034762/ENSAMXG00000003649/ENSAMXG00000021263/ENSAMXG00000043926	arpc5la/lmod2b/sptbn4b/
MOLNG-2583	pachonfedmuscle_VS_surfacefedmuscle	UP	Biological Process	GO:0043254	regulation of protein-containing complex assembly	4/148	87/11822	0.0235782375632367	0.4908424570182992	0.4756934502190167	4	1.09	4/1.09	ENSAMXG00000034762/ENSAMXG00000003649/ENSAMXG00000021263/ENSAMXG00000043926	arpc5la/lmod2b/sptbn4b/
MOLNG-2583	pachonfedmuscle_VS_surfacefedmuscle	UP	Biological Process	GO:0052548	regulation of endopeptidase activity	4/148	87/11822	0.0235782375632367	0.4908424570182992	0.4756934502190167	4	1.09	4/1.09	ENSAMXG00000010565/ENSAMXG00000031127/ENSAMXG00000010569/ENSAMXG00000021415	///igf1rb
MOLNG-2583	pachonfedmuscle_VS_surfacefedmuscle	UP	Biological Process	GO:0051493	regulation of cytoskeleton organization	5/148	130/11822	0.0236383052954988	0.4908424570182992	0.4756934502190167	5	1.63	5/1.63	ENSAMXG00000034762/ENSAMXG00000003649/ENSAMXG00000021263/ENSAMXG00000043926/ENSAMXG00000041330	arpc5la/lmod2b/sptbn4b//
MOLNG-2583	pachonfedmuscle_VS_surfacefedmuscle	UP	Biological Process	GO:0044087	regulation of cellular component biogenesis	5/148	132/11822	0.0250483059801121	0.5019033179462726	0.4864129367303969	5	1.65	5/1.65	ENSAMXG00000034762/ENSAMXG00000003649/ENSAMXG00000021263/ENSAMXG00000038045/ENSAMXG00000043926	arpc5la/lmod2b/sptbn4b/nostrin/
MOLNG-2583	pachonfedmuscle_VS_surfacefedmuscle	UP	Biological Process	GO:0097435	supramolecular fiber organization	7/148	230/11822	0.0255928037479685	0.5019033179462726	0.4864129367303969	7	2.88	7/2.88	ENSAMXG00000001452/ENSAMXG00000034762/ENSAMXG00000005850/ENSAMXG00000003649/ENSAMXG00000021263/ENSAMXG00000033850/ENSAMXG00000043926	tnnt2d/arpc5la/klhl41a/lmod2b/sptbn4b/plod2/
MOLNG-2583	pachonfedmuscle_VS_surfacefedmuscle	UP	Biological Process	GO:0032984	protein-containing complex disassembly	3/148	53/11822	0.0285615210523196	0.5203336368518111	0.5042744355951652	3	0.66	3/0.66	ENSAMXG00000003649/ENSAMXG00000021263/ENSAMXG00000043926	lmod2b/sptbn4b/
MOLNG-2583	pachonfedmuscle_VS_surfacefedmuscle	UP	Biological Process	GO:0030041	actin filament polymerization	4/148	94/11822	0.0302304617594481	0.5203336368518111	0.5042744355951652	4	1.18	4/1.18	ENSAMXG00000034762/ENSAMXG00000003649/ENSAMXG00000021263/ENSAMXG00000043926	arpc5la/lmod2b/sptbn4b/
MOLNG-2583	pachonfedmuscle_VS_surfacefedmuscle	UP	Biological Process	GO:0072593	reactive oxygen species metabolic process	2/148	22/11822	0.0305281570616053	0.5203336368518111	0.5042744355951652	2	0.28	2/0.28	ENSAMXG00000004945/ENSAMXG00000030601	ccs/cat
MOLNG-2583	pachonfedmuscle_VS_surfacefedmuscle	UP	Biological Process	GO:0110053	regulation of actin filament organization	4/148	95/11822	0.0312623367008478	0.5203336368518111	0.5042744355951652	4	1.19	4/1.19	ENSAMXG00000034762/ENSAMXG00000003649/ENSAMXG00000021263/ENSAMXG00000043926	arpc5la/lmod2b/sptbn4b/
MOLNG-2583	pachonfedmuscle_VS_surfacefedmuscle	UP	Biological Process	GO:0007600	sensory perception	4/148	96/11822	0.032314775802171	0.5203336368518111	0.5042744355951652	4	1.2	4/1.2	ENSAMXG00000035630/ENSAMXG00000035849/ENSAMXG00000000107/ENSAMXG00000003217	cnga3a/pdca/cngb3.2/
MOLNG-2583	pachonfedmuscle_VS_surfacefedmuscle	UP	Biological Process	GO:0052547	regulation of peptidase activity	4/148	96/11822	0.032314775802171	0.5203336368518111	0.5042744355951652	4	1.2	4/1.2	ENSAMXG00000010565/ENSAMXG00000031127/ENSAMXG00000010569/ENSAMXG00000021415	///igf1rb
MOLNG-2583	pachonfedmuscle_VS_surfacefedmuscle	UP	Biological Process	GO:0010639	negative regulation of organelle organization	3/148	56/11822	0.0329000046946583	0.5203336368518111	0.5042744355951652	3	0.7	3/0.7	ENSAMXG00000003649/ENSAMXG00000021263/ENSAMXG00000043926	lmod2b/sptbn4b/
MOLNG-2583	pachonfedmuscle_VS_surfacefedmuscle	UP	Biological Process	GO:0090501	RNA phosphodiester bond hydrolysis	3/148	56/11822	0.0329000046946583	0.5203336368518111	0.5042744355951652	3	0.7	3/0.7	ENSAMXG00000040932/ENSAMXG00000038483/ENSAMXG00000038047	//
MOLNG-2583	pachonfedmuscle_VS_surfacefedmuscle	UP	Biological Process	GO:0045214	sarcomere organization	2/148	23/11822	0.033165741725682	0.5203336368518111	0.5042744355951652	2	0.29	2/0.29	ENSAMXG00000001452/ENSAMXG00000005850	tnnt2d/klhl41a
MOLNG-2583	pachonfedmuscle_VS_surfacefedmuscle	UP	Biological Process	GO:1902903	regulation of supramolecular fiber organization	4/148	99/11822	0.0355958924372654	0.5463195665371615	0.5294583543300359	4	1.24	4/1.24	ENSAMXG00000034762/ENSAMXG00000003649/ENSAMXG00000021263/ENSAMXG00000043926	arpc5la/lmod2b/sptbn4b/
MOLNG-2583	pachonfedmuscle_VS_surfacefedmuscle	UP	Biological Process	GO:0090066	regulation of anatomical structure size	5/148	149/11822	0.0392265207976349	0.5800822822589077	0.562179041998345	5	1.87	5/1.87	ENSAMXG00000011972/ENSAMXG00000034762/ENSAMXG00000003649/ENSAMXG00000021263/ENSAMXG00000043926	slc12a7b/arpc5la/lmod2b/sptbn4b/
MOLNG-2583	pachonfedmuscle_VS_surfacefedmuscle	UP	Biological Process	GO:0007264	small GTPase mediated signal transduction	6/148	200/11822	0.0398154669596223	0.5800822822589077	0.562179041998345	6	2.5	6/2.5	ENSAMXG00000003534/ENSAMXG00000002840/ENSAMXG00000001893/ENSAMXG00000007413/ENSAMXG00000006246/ENSAMXG00000015945	rab4a/si:ch1073-13h15.3/DOCK4/arhgef12b/akap12b/dock9b
MOLNG-2583	pachonfedmuscle_VS_surfacefedmuscle	UP	Biological Process	GO:0030162	regulation of proteolysis	4/148	103/11822	0.0402606683154199	0.5800822822589077	0.562179041998345	4	1.29	4/1.29	ENSAMXG00000010565/ENSAMXG00000031127/ENSAMXG00000010569/ENSAMXG00000021415	///igf1rb
MOLNG-2583	pachonfedmuscle_VS_surfacefedmuscle	UP	Biological Process	GO:0051346	negative regulation of hydrolase activity	4/148	104/11822	0.0414787539035085	0.5856800051175405	0.5676040007848536	4	1.3	4/1.3	ENSAMXG00000010565/ENSAMXG00000031127/ENSAMXG00000010569/ENSAMXG00000021415	///igf1rb
MOLNG-2583	pachonfedmuscle_VS_surfacefedmuscle	UP	Biological Process	GO:0051258	protein polymerization	4/148	105/11822	0.0427176068402952	0.5858098077334778	0.5677297972666776	4	1.31	4/1.31	ENSAMXG00000034762/ENSAMXG00000003649/ENSAMXG00000021263/ENSAMXG00000043926	arpc5la/lmod2b/sptbn4b/
MOLNG-2583	pachonfedmuscle_VS_surfacefedmuscle	UP	Biological Process	GO:0043086	negative regulation of catalytic activity	5/148	153/11822	0.04314993551301	0.5858098077334778	0.5677297972666776	5	1.92	5/1.92	ENSAMXG00000010565/ENSAMXG00000031127/ENSAMXG00000010569/ENSAMXG00000021415/ENSAMXG00000040235	///igf1rb/inka1b
MOLNG-2583	pachonfedmuscle_VS_surfacefedmuscle	UP	Biological Process	GO:0032956	regulation of actin cytoskeleton organization	4/148	106/11822	0.0439772235267341	0.5858098077334778	0.5677297972666776	4	1.33	4/1.33	ENSAMXG00000034762/ENSAMXG00000003649/ENSAMXG00000021263/ENSAMXG00000043926	arpc5la/lmod2b/sptbn4b/
MOLNG-2583	pachonfedmuscle_VS_surfacefedmuscle	UP	Biological Process	GO:0051129	negative regulation of cellular component organization	3/148	64/11822	0.0460392061795627	0.5869722923297555	0.5688564037786508	3	0.8	3/0.8	ENSAMXG00000003649/ENSAMXG00000021263/ENSAMXG00000043926	lmod2b/sptbn4b/
MOLNG-2583	pachonfedmuscle_VS_surfacefedmuscle	UP	Biological Process	GO:0008154	actin polymerization or depolymerization	4/148	108/11822	0.0465587087400372	0.5869722923297555	0.5688564037786508	4	1.35	4/1.35	ENSAMXG00000034762/ENSAMXG00000003649/ENSAMXG00000021263/ENSAMXG00000043926	arpc5la/lmod2b/sptbn4b/
MOLNG-2583	pachonfedmuscle_VS_surfacefedmuscle	UP	Biological Process	GO:0032970	regulation of actin filament-based process	4/148	108/11822	0.0465587087400372	0.5869722923297555	0.5688564037786508	4	1.35	4/1.35	ENSAMXG00000034762/ENSAMXG00000003649/ENSAMXG00000021263/ENSAMXG00000043926	arpc5la/lmod2b/sptbn4b/
MOLNG-2583	pachonfedmuscle_VS_surfacefedmuscle	Down	Cellular Components	GO:0005615	extracellular space	7/94	194/10711	0.0015556025700836	0.0777801285041837	0.0720489611407175	7	1.7	7/1.7	ENSAMXG00000024736/ENSAMXG00000021644/ENSAMXG00000021816/ENSAMXG00000042149/ENSAMXG00000018060/ENSAMXG00000038575/ENSAMXG00000019600	rnpep/loxl5a/fgg/ccl34b.4/fgb/cfd/c3a.1
MOLNG-2583	pachonfedmuscle_VS_surfacefedmuscle	Down	Cellular Components	GO:0030017	sarcomere	3/94	55/10711	0.0123555360088147	0.1782643604788225	0.1651290918119619	3	0.48	3/0.48	ENSAMXG00000033466/ENSAMXG00000039743/ENSAMXG00000041324	myoz3a//myoz1b
MOLNG-2583	pachonfedmuscle_VS_surfacefedmuscle	Down	Cellular Components	GO:0030016	myofibril	3/94	58/10711	0.0142611488383058	0.1782643604788225	0.1651290918119619	3	0.51	3/0.51	ENSAMXG00000033466/ENSAMXG00000039743/ENSAMXG00000041324	myoz3a//myoz1b
MOLNG-2583	pachonfedmuscle_VS_surfacefedmuscle	Down	Cellular Components	GO:0043292	contractile fiber	3/94	58/10711	0.0142611488383058	0.1782643604788225	0.1651290918119619	3	0.51	3/0.51	ENSAMXG00000033466/ENSAMXG00000039743/ENSAMXG00000041324	myoz3a//myoz1b
MOLNG-2583	pachonfedmuscle_VS_surfacefedmuscle	Down	Cellular Components	GO:0030018	Z disc	2/94	24/10711	0.0185524717396765	0.1800032414132021	0.1667398446774924	2	0.21	2/0.21	ENSAMXG00000033466/ENSAMXG00000041324	myoz3a/myoz1b
MOLNG-2583	pachonfedmuscle_VS_surfacefedmuscle	Down	Cellular Components	GO:0031674	I band	2/94	26/10711	0.0216003889695842	0.1800032414132021	0.1667398446774924	2	0.23	2/0.23	ENSAMXG00000033466/ENSAMXG00000041324	myoz3a/myoz1b
MOLNG-2583	pachonfedmuscle_VS_surfacefedmuscle	Down	Molecular Functions	GO:0003810	protein-glutamine gamma-glutamyltransferase activity	2/142	10/13591	0.0046171306739725	0.3629988314539287	0.347367302826726	2	0.1	2/0.1	ENSAMXG00000005859/ENSAMXG00000019013	f13a1b/f13a1a.1
MOLNG-2583	pachonfedmuscle_VS_surfacefedmuscle	Down	Molecular Functions	GO:0016879	ligase activity, forming carbon-nitrogen bonds	3/142	36/13591	0.0061961788929824	0.3629988314539287	0.347367302826726	3	0.38	3/0.38	ENSAMXG00000002991/ENSAMXG00000005419/ENSAMXG00000039240	adss2/paics/asns
MOLNG-2583	pachonfedmuscle_VS_surfacefedmuscle	Down	Molecular Functions	GO:0016757	transferase activity, transferring glycosyl groups	8/142	276/13591	0.0084496914312895	0.3629988314539287	0.347367302826726	8	2.88	8/2.88	ENSAMXG00000000821/ENSAMXG00000031129/ENSAMXG00000043986/ENSAMXG00000043738/ENSAMXG00000013135/ENSAMXG00000043679/ENSAMXG00000029919/ENSAMXG00000037462	//gcnt7/st6gal2b/galnt8a.1//b3gnt3.4/b4galnt2.2
MOLNG-2583	pachonfedmuscle_VS_surfacefedmuscle	Down	Molecular Functions	GO:0016755	transferase activity, transferring amino-acyl groups	2/142	16/13591	0.011817794200513	0.3629988314539287	0.347367302826726	2	0.17	2/0.17	ENSAMXG00000005859/ENSAMXG00000019013	f13a1b/f13a1a.1
MOLNG-2583	pachonfedmuscle_VS_surfacefedmuscle	Down	Molecular Functions	GO:0016765	transferase activity, transferring alkyl or aryl (other than methyl) groups	3/142	46/13591	0.0122137195573517	0.3629988314539287	0.347367302826726	3	0.48	3/0.48	ENSAMXG00000039660/ENSAMXG00000010025/ENSAMXG00000029472	//mmab
MOLNG-2583	pachonfedmuscle_VS_surfacefedmuscle	Down	Molecular Functions	GO:0016829	lyase activity	5/142	133/13591	0.0128389410689133	0.3629988314539287	0.347367302826726	5	1.39	5/1.39	ENSAMXG00000014431/ENSAMXG00000006476/ENSAMXG00000042819/ENSAMXG00000010596/ENSAMXG00000005419	gldc/si:dkey-206f10.1/pts/ca9/paics
MOLNG-2583	pachonfedmuscle_VS_surfacefedmuscle	Down	Molecular Functions	GO:0008483	transaminase activity	2/142	18/13591	0.0148638605210569	0.3629988314539287	0.347367302826726	2	0.19	2/0.19	ENSAMXG00000031048/ENSAMXG00000006054	bcat1/agxtb
MOLNG-2583	pachonfedmuscle_VS_surfacefedmuscle	Down	Molecular Functions	GO:0016769	transferase activity, transferring nitrogenous groups	2/142	19/13591	0.0164999468842694	0.3629988314539287	0.347367302826726	2	0.2	2/0.2	ENSAMXG00000031048/ENSAMXG00000006054	bcat1/agxtb
MOLNG-2583	pachonfedmuscle_VS_surfacefedmuscle	Down	Molecular Functions	GO:0016638	oxidoreductase activity, acting on the CH-NH2 group of donors	2/142	22/13591	0.021839975838132	0.4270928608345831	0.4087013022340508	2	0.23	2/0.23	ENSAMXG00000014431/ENSAMXG00000021644	gldc/loxl5a
MOLNG-2583	pachonfedmuscle_VS_surfacefedmuscle	Down	Molecular Functions	GO:0015020	glucuronosyltransferase activity	2/142	24/13591	0.0257433042883761	0.45308215547542	0.4335714406463349	2	0.25	2/0.25	ENSAMXG00000031129/ENSAMXG00000043679	/
MOLNG-2583	pachonfedmuscle_VS_surfacefedmuscle	Down	Molecular Functions	GO:0016712	oxidoreductase activity, acting on paired donors, with incorporation or reduction of molecular oxygen, reduced flavin or flavoprotein as one donor, and incorporation of one atom of oxygen	2/142	27/13591	0.0320814338566181	0.4775260789522823	0.4569627549782606	2	0.28	2/0.28	ENSAMXG00000037683/ENSAMXG00000012560	/cyp3a65
MOLNG-2583	pachonfedmuscle_VS_surfacefedmuscle	Down	Molecular Functions	GO:0004866	endopeptidase inhibitor activity	3/142	74/13591	0.0422900097604156	0.4775260789522823	0.4569627549782606	3	0.77	3/0.77	ENSAMXG00000005905/ENSAMXG00000031428/ENSAMXG00000019600	itih2//c3a.1
MOLNG-2583	pachonfedmuscle_VS_surfacefedmuscle	Down	Molecular Functions	GO:0061135	endopeptidase regulator activity	3/142	74/13591	0.0422900097604156	0.4775260789522823	0.4569627549782606	3	0.77	3/0.77	ENSAMXG00000005905/ENSAMXG00000031428/ENSAMXG00000019600	itih2//c3a.1
MOLNG-2583	pachonfedmuscle_VS_surfacefedmuscle	Down	Molecular Functions	GO:0016758	transferase activity, transferring hexosyl groups	4/142	128/13591	0.0451812003976871	0.4775260789522823	0.4569627549782606	4	1.34	4/1.34	ENSAMXG00000031129/ENSAMXG00000013135/ENSAMXG00000043679/ENSAMXG00000037462	/galnt8a.1//b4galnt2.2
MOLNG-2583	pachonfedmuscle_VS_surfacefedmuscle	Down	Molecular Functions	GO:0019205	nucleobase-containing compound kinase activity	2/142	34/13591	0.048915326468279	0.4775260789522823	0.4569627549782606	2	0.36	2/0.36	ENSAMXG00000007505/ENSAMXG00000034136	uckl1a/nme2b.1
MOLNG-2583	pachonfedmuscle_VS_surfacefedmuscle	Down	Molecular Functions	GO:0070851	growth factor receptor binding	2/142	34/13591	0.048915326468279	0.4775260789522823	0.4569627549782606	2	0.36	2/0.36	ENSAMXG00000031424/ENSAMXG00000035938	epgn/artna
MOLNG-2583	pachonfedmuscle_VS_surfacefedmuscle	Down	Biological Process	GO:0017144	drug metabolic process	8/92	123/11822	4.899409330719027e-06	0.0022537282921307	0.0017380009941603	8	0.96	8/0.96	ENSAMXG00000014431/ENSAMXG00000002991/ENSAMXG00000039660/ENSAMXG00000010210/ENSAMXG00000042819/ENSAMXG00000034365/ENSAMXG00000039240/ENSAMXG00000029472	gldc/adss2//NOS2/pts/gcshb/asns/mmab
MOLNG-2583	pachonfedmuscle_VS_surfacefedmuscle	Down	Biological Process	GO:1901135	carbohydrate derivative metabolic process	13/92	457/11822	4.987969623759747e-05	0.0089236074706897	0.0068815920311726	13	3.56	13/3.56	ENSAMXG00000000399/ENSAMXG00000006476/ENSAMXG00000002991/ENSAMXG00000005905/ENSAMXG00000043738/ENSAMXG00000013135/ENSAMXG00000043679/ENSAMXG00000005419/ENSAMXG00000034539/ENSAMXG00000007505/ENSAMXG00000031428/ENSAMXG00000029919/ENSAMXG00000034136	/si:dkey-206f10.1/adss2/itih2/st6gal2b/galnt8a.1//paics/cdaa/uckl1a//b3gnt3.4/nme2b.1
MOLNG-2583	pachonfedmuscle_VS_surfacefedmuscle	Down	Biological Process	GO:0006955	immune response	9/92	229/11822	7.060701983626236e-05	0.0089236074706897	0.0068815920311726	9	1.78	9/1.78	ENSAMXG00000037572/ENSAMXG00000043767/ENSAMXG00000038554/ENSAMXG00000035765/ENSAMXG00000036068/ENSAMXG00000042149/ENSAMXG00000038575/ENSAMXG00000002657/ENSAMXG00000019600	//ly97.3/ly86//ccl34b.4/cfd/defbl1/c3a.1
MOLNG-2583	pachonfedmuscle_VS_surfacefedmuscle	Down	Biological Process	GO:0007596	blood coagulation	5/92	59/11822	9.1933256390653e-05	0.0089236074706897	0.0068815920311726	5	0.46	5/0.46	ENSAMXG00000017876/ENSAMXG00000021816/ENSAMXG00000005859/ENSAMXG00000019013/ENSAMXG00000018060	plg/fgg/f13a1b/f13a1a.1/fgb
MOLNG-2583	pachonfedmuscle_VS_surfacefedmuscle	Down	Biological Process	GO:0007599	hemostasis	5/92	60/11822	9.967921835810383e-05	0.0089236074706897	0.0068815920311726	5	0.47	5/0.47	ENSAMXG00000017876/ENSAMXG00000021816/ENSAMXG00000005859/ENSAMXG00000019013/ENSAMXG00000018060	plg/fgg/f13a1b/f13a1a.1/fgb
MOLNG-2583	pachonfedmuscle_VS_surfacefedmuscle	Down	Biological Process	GO:0050817	coagulation	5/92	64/11822	0.00013579402672788725	0.0089236074706897	0.0068815920311726	5	0.5	5/0.5	ENSAMXG00000017876/ENSAMXG00000021816/ENSAMXG00000005859/ENSAMXG00000019013/ENSAMXG00000018060	plg/fgg/f13a1b/f13a1a.1/fgb
MOLNG-2583	pachonfedmuscle_VS_surfacefedmuscle	Down	Biological Process	GO:0050878	regulation of body fluid levels	5/92	64/11822	0.00013579402672788725	0.0089236074706897	0.0068815920311726	5	0.5	5/0.5	ENSAMXG00000017876/ENSAMXG00000021816/ENSAMXG00000005859/ENSAMXG00000019013/ENSAMXG00000018060	plg/fgg/f13a1b/f13a1a.1/fgb
MOLNG-2583	pachonfedmuscle_VS_surfacefedmuscle	Down	Biological Process	GO:0098542	defense response to other organism	6/92	112/11822	0.000232584394446039	0.0129485089838854	0.0099854634498155	6	0.87	6/0.87	ENSAMXG00000000399/ENSAMXG00000038554/ENSAMXG00000035765/ENSAMXG00000042375/ENSAMXG00000038575/ENSAMXG00000002657	/ly97.3/ly86//cfd/defbl1
MOLNG-2583	pachonfedmuscle_VS_surfacefedmuscle	Down	Biological Process	GO:0042742	defense response to bacterium	4/92	40/11822	0.00025334039316297707	0.0129485089838854	0.0099854634498155	4	0.31	4/0.31	ENSAMXG00000000399/ENSAMXG00000038554/ENSAMXG00000042375/ENSAMXG00000002657	/ly97.3//defbl1
MOLNG-2583	pachonfedmuscle_VS_surfacefedmuscle	Down	Biological Process	GO:0042133	neurotransmitter metabolic process	3/92	23/11822	0.0007215740232515757	0.0302205652892472	0.0233051041246597	3	0.18	3/0.18	ENSAMXG00000014431/ENSAMXG00000010210/ENSAMXG00000034365	gldc/NOS2/gcshb
MOLNG-2583	pachonfedmuscle_VS_surfacefedmuscle	Down	Biological Process	GO:0044283	small molecule biosynthetic process	7/92	194/11822	0.0007768528213021334	0.0302205652892472	0.0233051041246597	7	1.51	7/1.51	ENSAMXG00000031048/ENSAMXG00000039660/ENSAMXG00000042819/ENSAMXG00000041790/ENSAMXG00000034136/ENSAMXG00000039240/ENSAMXG00000029472	bcat1//pts/itpkca/nme2b.1/asns/mmab
MOLNG-2583	pachonfedmuscle_VS_surfacefedmuscle	Down	Biological Process	GO:1901137	carbohydrate derivative biosynthetic process	9/92	317/11822	0.0007883625727629718	0.0302205652892472	0.0233051041246597	9	2.47	9/2.47	ENSAMXG00000006476/ENSAMXG00000002991/ENSAMXG00000043738/ENSAMXG00000013135/ENSAMXG00000043679/ENSAMXG00000005419/ENSAMXG00000007505/ENSAMXG00000029919/ENSAMXG00000034136	si:dkey-206f10.1/adss2/st6gal2b/galnt8a.1//paics/uckl1a/b3gnt3.4/nme2b.1
MOLNG-2583	pachonfedmuscle_VS_surfacefedmuscle	Down	Biological Process	GO:0009260	ribonucleotide biosynthetic process	5/92	100/11822	0.001076520435737	0.0338262179268943	0.0260856646255455	5	0.78	5/0.78	ENSAMXG00000006476/ENSAMXG00000002991/ENSAMXG00000005419/ENSAMXG00000007505/ENSAMXG00000034136	si:dkey-206f10.1/adss2/paics/uckl1a/nme2b.1
MOLNG-2583	pachonfedmuscle_VS_surfacefedmuscle	Down	Biological Process	GO:0006956	complement activation	3/92	27/11822	0.0011652433911684	0.0338262179268943	0.0260856646255455	3	0.21	3/0.21	ENSAMXG00000038554/ENSAMXG00000038575/ENSAMXG00000019600	ly97.3/cfd/c3a.1
MOLNG-2583	pachonfedmuscle_VS_surfacefedmuscle	Down	Biological Process	GO:0030203	glycosaminoglycan metabolic process	3/92	27/11822	0.0011652433911684	0.0338262179268943	0.0260856646255455	3	0.21	3/0.21	ENSAMXG00000000399/ENSAMXG00000005905/ENSAMXG00000031428	/itih2/
MOLNG-2583	pachonfedmuscle_VS_surfacefedmuscle	Down	Biological Process	GO:0046390	ribose phosphate biosynthetic process	5/92	102/11822	0.001176564101805	0.0338262179268943	0.0260856646255455	5	0.79	5/0.79	ENSAMXG00000006476/ENSAMXG00000002991/ENSAMXG00000005419/ENSAMXG00000007505/ENSAMXG00000034136	si:dkey-206f10.1/adss2/paics/uckl1a/nme2b.1
MOLNG-2583	pachonfedmuscle_VS_surfacefedmuscle	Down	Biological Process	GO:0006022	aminoglycan metabolic process	3/92	28/11822	0.0012977582037273	0.035115810218506	0.027080155706262	3	0.22	3/0.22	ENSAMXG00000000399/ENSAMXG00000005905/ENSAMXG00000031428	/itih2/
MOLNG-2583	pachonfedmuscle_VS_surfacefedmuscle	Down	Biological Process	GO:0009617	response to bacterium	4/92	64/11822	0.0015279924024172	0.0384243077476208	0.0296315599792865	4	0.5	4/0.5	ENSAMXG00000000399/ENSAMXG00000038554/ENSAMXG00000042375/ENSAMXG00000002657	/ly97.3//defbl1
MOLNG-2583	pachonfedmuscle_VS_surfacefedmuscle	Down	Biological Process	GO:0043207	response to external biotic stimulus	6/92	164/11822	0.0017349527495936	0.0384243077476208	0.0296315599792865	6	1.28	6/1.28	ENSAMXG00000000399/ENSAMXG00000038554/ENSAMXG00000035765/ENSAMXG00000042375/ENSAMXG00000038575/ENSAMXG00000002657	/ly97.3/ly86//cfd/defbl1
MOLNG-2583	pachonfedmuscle_VS_surfacefedmuscle	Down	Biological Process	GO:0051707	response to other organism	6/92	164/11822	0.0017349527495936	0.0384243077476208	0.0296315599792865	6	1.28	6/1.28	ENSAMXG00000000399/ENSAMXG00000038554/ENSAMXG00000035765/ENSAMXG00000042375/ENSAMXG00000038575/ENSAMXG00000002657	/ly97.3/ly86//cfd/defbl1
MOLNG-2583	pachonfedmuscle_VS_surfacefedmuscle	Down	Biological Process	GO:0009607	response to biotic stimulus	6/92	165/11822	0.0017893205601911	0.0384243077476208	0.0296315599792865	6	1.28	6/1.28	ENSAMXG00000000399/ENSAMXG00000038554/ENSAMXG00000035765/ENSAMXG00000042375/ENSAMXG00000038575/ENSAMXG00000002657	/ly97.3/ly86//cfd/defbl1
MOLNG-2583	pachonfedmuscle_VS_surfacefedmuscle	Down	Biological Process	GO:0002252	immune effector process	4/92	68/11822	0.0019127734495907	0.0384243077476208	0.0296315599792865	4	0.53	4/0.53	ENSAMXG00000038554/ENSAMXG00000035765/ENSAMXG00000038575/ENSAMXG00000019600	ly97.3/ly86/cfd/c3a.1
MOLNG-2583	pachonfedmuscle_VS_surfacefedmuscle	Down	Biological Process	GO:0006959	humoral immune response	3/92	32/11822	0.001921215387381	0.0384243077476208	0.0296315599792865	3	0.25	3/0.25	ENSAMXG00000038554/ENSAMXG00000038575/ENSAMXG00000019600	ly97.3/cfd/c3a.1
MOLNG-2583	pachonfedmuscle_VS_surfacefedmuscle	Down	Biological Process	GO:0009156	ribonucleoside monophosphate biosynthetic process	3/92	33/11822	0.002101512038034	0.0396905980851344	0.0306080813608474	3	0.26	3/0.26	ENSAMXG00000002991/ENSAMXG00000005419/ENSAMXG00000007505	adss2/paics/uckl1a
MOLNG-2583	pachonfedmuscle_VS_surfacefedmuscle	Down	Biological Process	GO:0002253	activation of immune response	3/92	34/11822	0.0022919917821834	0.0396905980851344	0.0306080813608474	3	0.26	3/0.26	ENSAMXG00000038554/ENSAMXG00000038575/ENSAMXG00000019600	ly97.3/cfd/c3a.1
MOLNG-2583	pachonfedmuscle_VS_surfacefedmuscle	Down	Biological Process	GO:0006952	defense response	6/92	176/11822	0.00247656384794	0.0396905980851344	0.0306080813608474	6	1.37	6/1.37	ENSAMXG00000000399/ENSAMXG00000038554/ENSAMXG00000035765/ENSAMXG00000042375/ENSAMXG00000038575/ENSAMXG00000002657	/ly97.3/ly86//cfd/defbl1
MOLNG-2583	pachonfedmuscle_VS_surfacefedmuscle	Down	Biological Process	GO:0009161	ribonucleoside monophosphate metabolic process	3/92	35/11822	0.0024928484953434	0.0396905980851344	0.0306080813608474	3	0.27	3/0.27	ENSAMXG00000002991/ENSAMXG00000005419/ENSAMXG00000007505	adss2/paics/uckl1a
MOLNG-2583	pachonfedmuscle_VS_surfacefedmuscle	Down	Biological Process	GO:0044419	interspecies interaction between organisms	6/92	177/11822	0.0025476712662736	0.0396905980851344	0.0306080813608474	6	1.38	6/1.38	ENSAMXG00000000399/ENSAMXG00000038554/ENSAMXG00000035765/ENSAMXG00000042375/ENSAMXG00000038575/ENSAMXG00000002657	/ly97.3/ly86//cfd/defbl1
MOLNG-2583	pachonfedmuscle_VS_surfacefedmuscle	Down	Biological Process	GO:0009110	vitamin biosynthetic process	2/92	10/11822	0.0025885172664218	0.0396905980851344	0.0306080813608474	2	0.08	2/0.08	ENSAMXG00000039660/ENSAMXG00000029472	/mmab
MOLNG-2583	pachonfedmuscle_VS_surfacefedmuscle	Down	Biological Process	GO:0018149	peptide cross-linking	2/92	10/11822	0.0025885172664218	0.0396905980851344	0.0306080813608474	2	0.08	2/0.08	ENSAMXG00000005859/ENSAMXG00000019013	f13a1b/f13a1a.1
MOLNG-2583	pachonfedmuscle_VS_surfacefedmuscle	Down	Biological Process	GO:0072527	pyrimidine-containing compound metabolic process	3/92	36/11822	0.0027042698199899	0.0401278747482378	0.0309452947143161	3	0.28	3/0.28	ENSAMXG00000034539/ENSAMXG00000007505/ENSAMXG00000034136	cdaa/uckl1a/nme2b.1
MOLNG-2583	pachonfedmuscle_VS_surfacefedmuscle	Down	Biological Process	GO:0030212	hyaluronan metabolic process	2/92	11/11822	0.0031477578932045	0.0440418820614079	0.0339636481800789	2	0.09	2/0.09	ENSAMXG00000005905/ENSAMXG00000031428	itih2/
MOLNG-2583	pachonfedmuscle_VS_surfacefedmuscle	Down	Biological Process	GO:0050778	positive regulation of immune response	3/92	38/11822	0.0031595263217966	0.0440418820614079	0.0339636481800789	3	0.3	3/0.3	ENSAMXG00000038554/ENSAMXG00000038575/ENSAMXG00000019600	ly97.3/cfd/c3a.1
MOLNG-2583	pachonfedmuscle_VS_surfacefedmuscle	Down	Biological Process	GO:0009124	nucleoside monophosphate biosynthetic process	3/92	39/11822	0.0034037065341276	0.0460501472264334	0.0355123560991031	3	0.3	3/0.3	ENSAMXG00000002991/ENSAMXG00000005419/ENSAMXG00000007505	adss2/paics/uckl1a
MOLNG-2583	pachonfedmuscle_VS_surfacefedmuscle	Down	Biological Process	GO:0030168	platelet activation	2/92	12/11822	0.0037582350183567	0.0493939459555462	0.0380909834943228	2	0.09	2/0.09	ENSAMXG00000021816/ENSAMXG00000018060	fgg/fgb
MOLNG-2583	pachonfedmuscle_VS_surfacefedmuscle	Down	Biological Process	GO:0009116	nucleoside metabolic process	3/92	42/11822	0.004204402765444	0.0502051154123862	0.0387165306498264	3	0.33	3/0.33	ENSAMXG00000034539/ENSAMXG00000007505/ENSAMXG00000034136	cdaa/uckl1a/nme2b.1
MOLNG-2583	pachonfedmuscle_VS_surfacefedmuscle	Down	Biological Process	GO:1901657	glycosyl compound metabolic process	3/92	43/11822	0.0044945279684438	0.0502051154123862	0.0387165306498264	3	0.33	3/0.33	ENSAMXG00000034539/ENSAMXG00000007505/ENSAMXG00000034136	cdaa/uckl1a/nme2b.1
MOLNG-2583	pachonfedmuscle_VS_surfacefedmuscle	Down	Biological Process	GO:0009152	purine ribonucleotide biosynthetic process	4/92	87/11822	0.0046745255487828	0.0502051154123862	0.0387165306498264	4	0.68	4/0.68	ENSAMXG00000006476/ENSAMXG00000002991/ENSAMXG00000005419/ENSAMXG00000034136	si:dkey-206f10.1/adss2/paics/nme2b.1
MOLNG-2583	pachonfedmuscle_VS_surfacefedmuscle	Down	Biological Process	GO:0001505	regulation of neurotransmitter levels	3/92	44/11822	0.0047965065533002	0.0502051154123862	0.0387165306498264	3	0.34	3/0.34	ENSAMXG00000014431/ENSAMXG00000010210/ENSAMXG00000034365	gldc/NOS2/gcshb
MOLNG-2583	pachonfedmuscle_VS_surfacefedmuscle	Down	Biological Process	GO:0009165	nucleotide biosynthetic process	5/92	143/11822	0.0051143794901942	0.0502051154123862	0.0387165306498264	5	1.11	5/1.11	ENSAMXG00000006476/ENSAMXG00000002991/ENSAMXG00000005419/ENSAMXG00000007505/ENSAMXG00000034136	si:dkey-206f10.1/adss2/paics/uckl1a/nme2b.1
MOLNG-2583	pachonfedmuscle_VS_surfacefedmuscle	Down	Biological Process	GO:0006241	CTP biosynthetic process	2/92	14/11822	0.0051296530964829	0.0502051154123862	0.0387165306498264	2	0.11	2/0.11	ENSAMXG00000007505/ENSAMXG00000034136	uckl1a/nme2b.1
MOLNG-2583	pachonfedmuscle_VS_surfacefedmuscle	Down	Biological Process	GO:0006767	water-soluble vitamin metabolic process	2/92	14/11822	0.0051296530964829	0.0502051154123862	0.0387165306498264	2	0.11	2/0.11	ENSAMXG00000039660/ENSAMXG00000029472	/mmab
MOLNG-2583	pachonfedmuscle_VS_surfacefedmuscle	Down	Biological Process	GO:0009069	serine family amino acid metabolic process	2/92	14/11822	0.0051296530964829	0.0502051154123862	0.0387165306498264	2	0.11	2/0.11	ENSAMXG00000014431/ENSAMXG00000034365	gldc/gcshb
MOLNG-2583	pachonfedmuscle_VS_surfacefedmuscle	Down	Biological Process	GO:0009148	pyrimidine nucleoside triphosphate biosynthetic process	2/92	14/11822	0.0051296530964829	0.0502051154123862	0.0387165306498264	2	0.11	2/0.11	ENSAMXG00000007505/ENSAMXG00000034136	uckl1a/nme2b.1
MOLNG-2583	pachonfedmuscle_VS_surfacefedmuscle	Down	Biological Process	GO:0009208	pyrimidine ribonucleoside triphosphate metabolic process	2/92	14/11822	0.0051296530964829	0.0502051154123862	0.0387165306498264	2	0.11	2/0.11	ENSAMXG00000007505/ENSAMXG00000034136	uckl1a/nme2b.1
MOLNG-2583	pachonfedmuscle_VS_surfacefedmuscle	Down	Biological Process	GO:0009209	pyrimidine ribonucleoside triphosphate biosynthetic process	2/92	14/11822	0.0051296530964829	0.0502051154123862	0.0387165306498264	2	0.11	2/0.11	ENSAMXG00000007505/ENSAMXG00000034136	uckl1a/nme2b.1
MOLNG-2583	pachonfedmuscle_VS_surfacefedmuscle	Down	Biological Process	GO:0046036	CTP metabolic process	2/92	14/11822	0.0051296530964829	0.0502051154123862	0.0387165306498264	2	0.11	2/0.11	ENSAMXG00000007505/ENSAMXG00000034136	uckl1a/nme2b.1
MOLNG-2583	pachonfedmuscle_VS_surfacefedmuscle	Down	Biological Process	GO:0009123	nucleoside monophosphate metabolic process	3/92	46/11822	0.0054365626019512	0.0521003916020324	0.0401781051942446	3	0.36	3/0.36	ENSAMXG00000002991/ENSAMXG00000005419/ENSAMXG00000007505	adss2/paics/uckl1a
MOLNG-2583	pachonfedmuscle_VS_surfacefedmuscle	Down	Biological Process	GO:0009147	pyrimidine nucleoside triphosphate metabolic process	2/92	15/11822	0.0058889944303082	0.0543408564209847	0.041905877834947	2	0.12	2/0.12	ENSAMXG00000007505/ENSAMXG00000034136	uckl1a/nme2b.1
MOLNG-2583	pachonfedmuscle_VS_surfacefedmuscle	Down	Biological Process	GO:1901293	nucleoside phosphate biosynthetic process	5/92	148/11822	0.0059066148283679	0.0543408564209847	0.041905877834947	5	1.15	5/1.15	ENSAMXG00000006476/ENSAMXG00000002991/ENSAMXG00000005419/ENSAMXG00000007505/ENSAMXG00000034136	si:dkey-206f10.1/adss2/paics/uckl1a/nme2b.1
MOLNG-2583	pachonfedmuscle_VS_surfacefedmuscle	Down	Biological Process	GO:0042060	wound healing	5/92	149/11822	0.0060748775884702	0.0547930135430647	0.0422545665080385	5	1.16	5/1.16	ENSAMXG00000017876/ENSAMXG00000021816/ENSAMXG00000005859/ENSAMXG00000019013/ENSAMXG00000018060	plg/fgg/f13a1b/f13a1a.1/fgb
MOLNG-2583	pachonfedmuscle_VS_surfacefedmuscle	Down	Biological Process	GO:0006164	purine nucleotide biosynthetic process	4/92	95/11822	0.0063788137282967	0.0564279675964708	0.0435153891991091	4	0.74	4/0.74	ENSAMXG00000006476/ENSAMXG00000002991/ENSAMXG00000005419/ENSAMXG00000034136	si:dkey-206f10.1/adss2/paics/nme2b.1
MOLNG-2583	pachonfedmuscle_VS_surfacefedmuscle	Down	Biological Process	GO:0072522	purine-containing compound biosynthetic process	4/92	96/11822	0.0066172168202269	0.0570431760321399	0.0439898176723825	4	0.75	4/0.75	ENSAMXG00000006476/ENSAMXG00000002991/ENSAMXG00000005419/ENSAMXG00000034136	si:dkey-206f10.1/adss2/paics/nme2b.1
MOLNG-2583	pachonfedmuscle_VS_surfacefedmuscle	Down	Biological Process	GO:0019882	antigen processing and presentation	2/92	16/11822	0.0066963728385555	0.0570431760321399	0.0439898176723825	2	0.12	2/0.12	ENSAMXG00000037572/ENSAMXG00000036068	/
MOLNG-2583	pachonfedmuscle_VS_surfacefedmuscle	Down	Biological Process	GO:0002684	positive regulation of immune system process	3/92	50/11822	0.0068645514428728	0.0574126120676634	0.0442747145693422	3	0.39	3/0.39	ENSAMXG00000038554/ENSAMXG00000038575/ENSAMXG00000019600	ly97.3/cfd/c3a.1
MOLNG-2583	pachonfedmuscle_VS_surfacefedmuscle	Down	Biological Process	GO:0070085	glycosylation	5/92	158/11822	0.0077442416943517	0.0636134139178892	0.0490565686277544	5	1.23	5/1.23	ENSAMXG00000043738/ENSAMXG00000013135/ENSAMXG00000043679/ENSAMXG00000029919/ENSAMXG00000037462	st6gal2b/galnt8a.1//b3gnt3.4/b4galnt2.2
MOLNG-2583	pachonfedmuscle_VS_surfacefedmuscle	Down	Biological Process	GO:0009259	ribonucleotide metabolic process	5/92	159/11822	0.007947570516095	0.0641382883755042	0.0494613345138327	5	1.24	5/1.24	ENSAMXG00000006476/ENSAMXG00000002991/ENSAMXG00000005419/ENSAMXG00000007505/ENSAMXG00000034136	si:dkey-206f10.1/adss2/paics/uckl1a/nme2b.1
MOLNG-2583	pachonfedmuscle_VS_surfacefedmuscle	Down	Biological Process	GO:0019693	ribose phosphate metabolic process	5/92	161/11822	0.0083653350225093	0.0658980546212056	0.050818408254797	5	1.25	5/1.25	ENSAMXG00000006476/ENSAMXG00000002991/ENSAMXG00000005419/ENSAMXG00000007505/ENSAMXG00000034136	si:dkey-206f10.1/adss2/paics/uckl1a/nme2b.1
MOLNG-2583	pachonfedmuscle_VS_surfacefedmuscle	Down	Biological Process	GO:1903510	mucopolysaccharide metabolic process	2/92	18/11822	0.008452141788372	0.0658980546212056	0.050818408254797	2	0.14	2/0.14	ENSAMXG00000005905/ENSAMXG00000031428	itih2/
MOLNG-2583	pachonfedmuscle_VS_surfacefedmuscle	Down	Biological Process	GO:0051346	negative regulation of hydrolase activity	4/92	104/11822	0.0087397423510276	0.0663465312695786	0.0511642586678444	4	0.81	4/0.81	ENSAMXG00000005905/ENSAMXG00000031428/ENSAMXG00000032400/ENSAMXG00000019600	itih2//zgc:162989/c3a.1
MOLNG-2583	pachonfedmuscle_VS_surfacefedmuscle	Down	Biological Process	GO:0051186	cofactor metabolic process	5/92	163/11822	0.0087981269727049	0.0663465312695786	0.0511642586678444	5	1.27	5/1.27	ENSAMXG00000039660/ENSAMXG00000042819/ENSAMXG00000010025/ENSAMXG00000005720/ENSAMXG00000029472	/pts//ggt5a/mmab
MOLNG-2583	pachonfedmuscle_VS_surfacefedmuscle	Down	Biological Process	GO:0009119	ribonucleoside metabolic process	2/92	19/11822	0.0093990050831654	0.0675553490352519	0.052096459095835	2	0.15	2/0.15	ENSAMXG00000034539/ENSAMXG00000034136	cdaa/nme2b.1
MOLNG-2583	pachonfedmuscle_VS_surfacefedmuscle	Down	Biological Process	GO:0009218	pyrimidine ribonucleotide metabolic process	2/92	19/11822	0.0093990050831654	0.0675553490352519	0.052096459095835	2	0.15	2/0.15	ENSAMXG00000007505/ENSAMXG00000034136	uckl1a/nme2b.1
MOLNG-2583	pachonfedmuscle_VS_surfacefedmuscle	Down	Biological Process	GO:0009220	pyrimidine ribonucleotide biosynthetic process	2/92	19/11822	0.0093990050831654	0.0675553490352519	0.052096459095835	2	0.15	2/0.15	ENSAMXG00000007505/ENSAMXG00000034136	uckl1a/nme2b.1
MOLNG-2583	pachonfedmuscle_VS_surfacefedmuscle	Down	Biological Process	GO:0090407	organophosphate biosynthetic process	6/92	235/11822	0.0099722373619861	0.0682827336968682	0.0526573941781341	6	1.83	6/1.83	ENSAMXG00000006476/ENSAMXG00000002991/ENSAMXG00000005419/ENSAMXG00000007505/ENSAMXG00000041790/ENSAMXG00000034136	si:dkey-206f10.1/adss2/paics/uckl1a/itpkca/nme2b.1
MOLNG-2583	pachonfedmuscle_VS_surfacefedmuscle	Down	Biological Process	GO:0009127	purine nucleoside monophosphate biosynthetic process	2/92	20/11822	0.0103908507799582	0.0682827336968682	0.0526573941781341	2	0.16	2/0.16	ENSAMXG00000002991/ENSAMXG00000005419	adss2/paics
MOLNG-2583	pachonfedmuscle_VS_surfacefedmuscle	Down	Biological Process	GO:0009168	purine ribonucleoside monophosphate biosynthetic process	2/92	20/11822	0.0103908507799582	0.0682827336968682	0.0526573941781341	2	0.16	2/0.16	ENSAMXG00000002991/ENSAMXG00000005419	adss2/paics
MOLNG-2583	pachonfedmuscle_VS_surfacefedmuscle	Down	Biological Process	GO:0033014	tetrapyrrole biosynthetic process	2/92	20/11822	0.0103908507799582	0.0682827336968682	0.0526573941781341	2	0.16	2/0.16	ENSAMXG00000039660/ENSAMXG00000029472	/mmab
MOLNG-2583	pachonfedmuscle_VS_surfacefedmuscle	Down	Biological Process	GO:0042737	drug catabolic process	2/92	20/11822	0.0103908507799582	0.0682827336968682	0.0526573941781341	2	0.16	2/0.16	ENSAMXG00000014431/ENSAMXG00000034365	gldc/gcshb
MOLNG-2583	pachonfedmuscle_VS_surfacefedmuscle	Down	Biological Process	GO:0046173	polyol biosynthetic process	2/92	20/11822	0.0103908507799582	0.0682827336968682	0.0526573941781341	2	0.16	2/0.16	ENSAMXG00000042819/ENSAMXG00000041790	pts/itpkca
MOLNG-2583	pachonfedmuscle_VS_surfacefedmuscle	Down	Biological Process	GO:0050776	regulation of immune response	3/92	59/11822	0.0108290795226371	0.070160233526945	0.054105260179818	3	0.46	3/0.46	ENSAMXG00000038554/ENSAMXG00000038575/ENSAMXG00000019600	ly97.3/cfd/c3a.1
MOLNG-2583	pachonfedmuscle_VS_surfacefedmuscle	Down	Biological Process	GO:0009611	response to wounding	5/92	176/11822	0.0119951499848798	0.0766356804589543	0.0590989114752119	5	1.37	5/1.37	ENSAMXG00000017876/ENSAMXG00000021816/ENSAMXG00000005859/ENSAMXG00000019013/ENSAMXG00000018060	plg/fgg/f13a1b/f13a1a.1/fgb
MOLNG-2583	pachonfedmuscle_VS_surfacefedmuscle	Down	Biological Process	GO:0009126	purine nucleoside monophosphate metabolic process	2/92	22/11822	0.0125065310755089	0.0777433012801908	0.059953072154289	2	0.17	2/0.17	ENSAMXG00000002991/ENSAMXG00000005419	adss2/paics
MOLNG-2583	pachonfedmuscle_VS_surfacefedmuscle	Down	Biological Process	GO:0009167	purine ribonucleoside monophosphate metabolic process	2/92	22/11822	0.0125065310755089	0.0777433012801908	0.059953072154289	2	0.17	2/0.17	ENSAMXG00000002991/ENSAMXG00000005419	adss2/paics
MOLNG-2583	pachonfedmuscle_VS_surfacefedmuscle	Down	Biological Process	GO:0009605	response to external stimulus	9/92	483/11822	0.0126966657741165	0.0778728834145817	0.0600530016263479	9	3.76	9/3.76	ENSAMXG00000017876/ENSAMXG00000000399/ENSAMXG00000038554/ENSAMXG00000004857/ENSAMXG00000035765/ENSAMXG00000042149/ENSAMXG00000042375/ENSAMXG00000038575/ENSAMXG00000002657	plg//ly97.3/notum2/ly86/ccl34b.4//cfd/defbl1
MOLNG-2583	pachonfedmuscle_VS_surfacefedmuscle	Down	Biological Process	GO:0045087	innate immune response	3/92	67/11822	0.0152643040585354	0.0923892087753462	0.0712475134034134	3	0.52	3/0.52	ENSAMXG00000035765/ENSAMXG00000038575/ENSAMXG00000002657	ly86/cfd/defbl1
MOLNG-2583	pachonfedmuscle_VS_surfacefedmuscle	Down	Biological Process	GO:0019752	carboxylic acid metabolic process	7/92	341/11822	0.0168808652098838	0.1008467272278773	0.0777696729423218	7	2.65	7/2.65	ENSAMXG00000031048/ENSAMXG00000014431/ENSAMXG00000005905/ENSAMXG00000004995/ENSAMXG00000034365/ENSAMXG00000031428/ENSAMXG00000039240	bcat1/gldc/itih2/si:dkey-11k2.7/gcshb//asns
MOLNG-2583	pachonfedmuscle_VS_surfacefedmuscle	Down	Biological Process	GO:0006766	vitamin metabolic process	2/92	26/11822	0.0172456159645535	0.1017049146627515	0.0784314788131516	2	0.2	2/0.2	ENSAMXG00000039660/ENSAMXG00000029472	/mmab
MOLNG-2583	pachonfedmuscle_VS_surfacefedmuscle	Down	Biological Process	GO:0006220	pyrimidine nucleotide metabolic process	2/92	27/11822	0.0185320457704243	0.1060045320016515	0.0817472020241568	2	0.21	2/0.21	ENSAMXG00000007505/ENSAMXG00000034136	uckl1a/nme2b.1
MOLNG-2583	pachonfedmuscle_VS_surfacefedmuscle	Down	Biological Process	GO:0006221	pyrimidine nucleotide biosynthetic process	2/92	27/11822	0.0185320457704243	0.1060045320016515	0.0817472020241568	2	0.21	2/0.21	ENSAMXG00000007505/ENSAMXG00000034136	uckl1a/nme2b.1
MOLNG-2583	pachonfedmuscle_VS_surfacefedmuscle	Down	Biological Process	GO:0055086	nucleobase-containing small molecule metabolic process	6/92	270/11822	0.0186660154176821	0.1060045320016515	0.0817472020241568	6	2.1	6/2.1	ENSAMXG00000006476/ENSAMXG00000002991/ENSAMXG00000005419/ENSAMXG00000034539/ENSAMXG00000007505/ENSAMXG00000034136	si:dkey-206f10.1/adss2/paics/cdaa/uckl1a/nme2b.1
MOLNG-2583	pachonfedmuscle_VS_surfacefedmuscle	Down	Biological Process	GO:0043436	oxoacid metabolic process	7/92	349/11822	0.018922058399217	0.1061481324834124	0.0818579419837757	7	2.72	7/2.72	ENSAMXG00000031048/ENSAMXG00000014431/ENSAMXG00000005905/ENSAMXG00000004995/ENSAMXG00000034365/ENSAMXG00000031428/ENSAMXG00000039240	bcat1/gldc/itih2/si:dkey-11k2.7/gcshb//asns
MOLNG-2583	pachonfedmuscle_VS_surfacefedmuscle	Down	Biological Process	GO:0006082	organic acid metabolic process	7/92	352/11822	0.0197305537158743	0.1093500567385805	0.0843271604597292	7	2.74	7/2.74	ENSAMXG00000031048/ENSAMXG00000014431/ENSAMXG00000005905/ENSAMXG00000004995/ENSAMXG00000034365/ENSAMXG00000031428/ENSAMXG00000039240	bcat1/gldc/itih2/si:dkey-11k2.7/gcshb//asns
MOLNG-2583	pachonfedmuscle_VS_surfacefedmuscle	Down	Biological Process	GO:0010951	negative regulation of endopeptidase activity	3/92	75/11822	0.0205837312600312	0.1122087197349435	0.0865316671640182	3	0.58	3/0.58	ENSAMXG00000005905/ENSAMXG00000031428/ENSAMXG00000019600	itih2//c3a.1
MOLNG-2583	pachonfedmuscle_VS_surfacefedmuscle	Down	Biological Process	GO:0033013	tetrapyrrole metabolic process	2/92	29/11822	0.0212220839498697	0.1122087197349435	0.0865316671640182	2	0.23	2/0.23	ENSAMXG00000039660/ENSAMXG00000029472	/mmab
MOLNG-2583	pachonfedmuscle_VS_surfacefedmuscle	Down	Biological Process	GO:0046165	alcohol biosynthetic process	2/92	29/11822	0.0212220839498697	0.1122087197349435	0.0865316671640182	2	0.23	2/0.23	ENSAMXG00000042819/ENSAMXG00000041790	pts/itpkca
MOLNG-2583	pachonfedmuscle_VS_surfacefedmuscle	Down	Biological Process	GO:0072528	pyrimidine-containing compound biosynthetic process	2/92	29/11822	0.0212220839498697	0.1122087197349435	0.0865316671640182	2	0.23	2/0.23	ENSAMXG00000007505/ENSAMXG00000034136	uckl1a/nme2b.1
MOLNG-2583	pachonfedmuscle_VS_surfacefedmuscle	Down	Biological Process	GO:0010466	negative regulation of peptidase activity	3/92	81/11822	0.0251605134809909	0.1263272607155195	0.0974194207348514	3	0.63	3/0.63	ENSAMXG00000005905/ENSAMXG00000031428/ENSAMXG00000019600	itih2//c3a.1
MOLNG-2583	pachonfedmuscle_VS_surfacefedmuscle	Down	Biological Process	GO:0045861	negative regulation of proteolysis	3/92	81/11822	0.0251605134809909	0.1263272607155195	0.0974194207348514	3	0.63	3/0.63	ENSAMXG00000005905/ENSAMXG00000031428/ENSAMXG00000019600	itih2//c3a.1
MOLNG-2583	pachonfedmuscle_VS_surfacefedmuscle	Down	Biological Process	GO:0006749	glutathione metabolic process	2/92	32/11822	0.0255400766229202	0.1263272607155195	0.0974194207348514	2	0.25	2/0.25	ENSAMXG00000010025/ENSAMXG00000005720	/ggt5a
MOLNG-2583	pachonfedmuscle_VS_surfacefedmuscle	Down	Biological Process	GO:0008652	cellular amino acid biosynthetic process	2/92	32/11822	0.0255400766229202	0.1263272607155195	0.0974194207348514	2	0.25	2/0.25	ENSAMXG00000031048/ENSAMXG00000039240	bcat1/asns
MOLNG-2583	pachonfedmuscle_VS_surfacefedmuscle	Down	Biological Process	GO:1901136	carbohydrate derivative catabolic process	2/92	32/11822	0.0255400766229202	0.1263272607155195	0.0974194207348514	2	0.25	2/0.25	ENSAMXG00000000399/ENSAMXG00000034539	/cdaa
MOLNG-2583	pachonfedmuscle_VS_surfacefedmuscle	Down	Biological Process	GO:1901606	alpha-amino acid catabolic process	2/92	32/11822	0.0255400766229202	0.1263272607155195	0.0974194207348514	2	0.25	2/0.25	ENSAMXG00000014431/ENSAMXG00000034365	gldc/gcshb
MOLNG-2583	pachonfedmuscle_VS_surfacefedmuscle	Down	Biological Process	GO:1901605	alpha-amino acid metabolic process	3/92	83/11822	0.0267981279458754	0.1308794476518138	0.1009299172967076	3	0.65	3/0.65	ENSAMXG00000014431/ENSAMXG00000034365/ENSAMXG00000039240	gldc/gcshb/asns
MOLNG-2583	pachonfedmuscle_VS_surfacefedmuscle	Down	Biological Process	GO:0009150	purine ribonucleotide metabolic process	4/92	146/11822	0.0270294511454832	0.1308794476518138	0.1009299172967076	4	1.14	4/1.14	ENSAMXG00000006476/ENSAMXG00000002991/ENSAMXG00000005419/ENSAMXG00000034136	si:dkey-206f10.1/adss2/paics/nme2b.1
MOLNG-2583	pachonfedmuscle_VS_surfacefedmuscle	Down	Biological Process	GO:0009117	nucleotide metabolic process	5/92	220/11822	0.02844346617081	0.1353682636884909	0.1043915443089736	5	1.71	5/1.71	ENSAMXG00000006476/ENSAMXG00000002991/ENSAMXG00000005419/ENSAMXG00000007505/ENSAMXG00000034136	si:dkey-206f10.1/adss2/paics/uckl1a/nme2b.1
MOLNG-2583	pachonfedmuscle_VS_surfacefedmuscle	Down	Biological Process	GO:0006486	protein glycosylation	4/92	149/11822	0.0288393257423306	0.1353682636884909	0.1043915443089736	4	1.16	4/1.16	ENSAMXG00000043738/ENSAMXG00000013135/ENSAMXG00000043679/ENSAMXG00000029919	st6gal2b/galnt8a.1//b3gnt3.4
MOLNG-2583	pachonfedmuscle_VS_surfacefedmuscle	Down	Biological Process	GO:0043413	macromolecule glycosylation	4/92	149/11822	0.0288393257423306	0.1353682636884909	0.1043915443089736	4	1.16	4/1.16	ENSAMXG00000043738/ENSAMXG00000013135/ENSAMXG00000043679/ENSAMXG00000029919	st6gal2b/galnt8a.1//b3gnt3.4
MOLNG-2583	pachonfedmuscle_VS_surfacefedmuscle	Down	Biological Process	GO:0019751	polyol metabolic process	2/92	35/11822	0.0301819946465498	0.1391082121874321	0.1072756693527795	2	0.27	2/0.27	ENSAMXG00000042819/ENSAMXG00000041790	pts/itpkca
MOLNG-2583	pachonfedmuscle_VS_surfacefedmuscle	Down	Biological Process	GO:0052548	regulation of endopeptidase activity	3/92	87/11822	0.03024091569292	0.1391082121874321	0.1072756693527795	3	0.68	3/0.68	ENSAMXG00000005905/ENSAMXG00000031428/ENSAMXG00000019600	itih2//c3a.1
MOLNG-2583	pachonfedmuscle_VS_surfacefedmuscle	Down	Biological Process	GO:0043086	negative regulation of catalytic activity	4/92	153/11822	0.0313625289224762	0.1428392406370203	0.1101529155484573	4	1.19	4/1.19	ENSAMXG00000005905/ENSAMXG00000031428/ENSAMXG00000032400/ENSAMXG00000019600	itih2//zgc:162989/c3a.1
MOLNG-2583	pachonfedmuscle_VS_surfacefedmuscle	Down	Biological Process	GO:0006520	cellular amino acid metabolic process	4/92	154/11822	0.0320130716796522	0.1431324401825563	0.1103790213764793	4	1.2	4/1.2	ENSAMXG00000031048/ENSAMXG00000014431/ENSAMXG00000034365/ENSAMXG00000039240	bcat1/gldc/gcshb/asns
MOLNG-2583	pachonfedmuscle_VS_surfacefedmuscle	Down	Biological Process	GO:0006753	nucleoside phosphate metabolic process	5/92	228/11822	0.0324716975965199	0.1431324401825563	0.1103790213764793	5	1.77	5/1.77	ENSAMXG00000006476/ENSAMXG00000002991/ENSAMXG00000005419/ENSAMXG00000007505/ENSAMXG00000034136	si:dkey-206f10.1/adss2/paics/uckl1a/nme2b.1
MOLNG-2583	pachonfedmuscle_VS_surfacefedmuscle	Down	Biological Process	GO:0006163	purine nucleotide metabolic process	4/92	155/11822	0.0326715352590617	0.1431324401825563	0.1103790213764793	4	1.21	4/1.21	ENSAMXG00000006476/ENSAMXG00000002991/ENSAMXG00000005419/ENSAMXG00000034136	si:dkey-206f10.1/adss2/paics/nme2b.1
MOLNG-2583	pachonfedmuscle_VS_surfacefedmuscle	Down	Biological Process	GO:0098609	cell-cell adhesion	4/92	155/11822	0.0326715352590617	0.1431324401825563	0.1103790213764793	4	1.21	4/1.21	ENSAMXG00000042962/ENSAMXG00000018475/ENSAMXG00000035912/ENSAMXG00000032255	///
MOLNG-2583	pachonfedmuscle_VS_surfacefedmuscle	Down	Biological Process	GO:0009199	ribonucleoside triphosphate metabolic process	2/92	37/11822	0.0334481539229419	0.1437958019117129	0.1108905840829457	2	0.29	2/0.29	ENSAMXG00000007505/ENSAMXG00000034136	uckl1a/nme2b.1
MOLNG-2583	pachonfedmuscle_VS_surfacefedmuscle	Down	Biological Process	GO:0009201	ribonucleoside triphosphate biosynthetic process	2/92	37/11822	0.0334481539229419	0.1437958019117129	0.1108905840829457	2	0.29	2/0.29	ENSAMXG00000007505/ENSAMXG00000034136	uckl1a/nme2b.1
MOLNG-2583	pachonfedmuscle_VS_surfacefedmuscle	Down	Biological Process	GO:0009142	nucleoside triphosphate biosynthetic process	2/92	38/11822	0.0351308554563389	0.1496314213881102	0.1153908215281308	2	0.3	2/0.3	ENSAMXG00000007505/ENSAMXG00000034136	uckl1a/nme2b.1
MOLNG-2583	pachonfedmuscle_VS_surfacefedmuscle	Down	Biological Process	GO:0009101	glycoprotein biosynthetic process	4/92	160/11822	0.0360830079301503	0.1522769142006344	0.1174309384110156	4	1.25	4/1.25	ENSAMXG00000043738/ENSAMXG00000013135/ENSAMXG00000043679/ENSAMXG00000029919	st6gal2b/galnt8a.1//b3gnt3.4
MOLNG-2583	pachonfedmuscle_VS_surfacefedmuscle	Down	Biological Process	GO:0007156	homophilic cell adhesion via plasma membrane adhesion molecules	3/92	95/11822	0.0377917694481406	0.1547383444943081	0.1193291123445808	3	0.74	3/0.74	ENSAMXG00000018475/ENSAMXG00000035912/ENSAMXG00000032255	//
MOLNG-2583	pachonfedmuscle_VS_surfacefedmuscle	Down	Biological Process	GO:0044282	small molecule catabolic process	3/92	95/11822	0.0377917694481406	0.1547383444943081	0.1193291123445808	3	0.74	3/0.74	ENSAMXG00000014431/ENSAMXG00000034539/ENSAMXG00000034365	gldc/cdaa/gcshb
MOLNG-2583	pachonfedmuscle_VS_surfacefedmuscle	Down	Biological Process	GO:0072521	purine-containing compound metabolic process	4/92	163/11822	0.0382254955644912	0.1547383444943081	0.1193291123445808	4	1.27	4/1.27	ENSAMXG00000006476/ENSAMXG00000002991/ENSAMXG00000005419/ENSAMXG00000034136	si:dkey-206f10.1/adss2/paics/nme2b.1
MOLNG-2583	pachonfedmuscle_VS_surfacefedmuscle	Down	Biological Process	GO:0009063	cellular amino acid catabolic process	2/92	40/11822	0.0385925046292939	0.1547383444943081	0.1193291123445808	2	0.31	2/0.31	ENSAMXG00000014431/ENSAMXG00000034365	gldc/gcshb
MOLNG-2583	pachonfedmuscle_VS_surfacefedmuscle	Down	Biological Process	GO:0051188	cofactor biosynthetic process	3/92	96/11822	0.0387974001780733	0.1547383444943081	0.1193291123445808	3	0.75	3/0.75	ENSAMXG00000039660/ENSAMXG00000042819/ENSAMXG00000029472	/pts/mmab
MOLNG-2583	pachonfedmuscle_VS_surfacefedmuscle	Down	Biological Process	GO:0052547	regulation of peptidase activity	3/92	96/11822	0.0387974001780733	0.1547383444943081	0.1193291123445808	3	0.75	3/0.75	ENSAMXG00000005905/ENSAMXG00000031428/ENSAMXG00000019600	itih2//c3a.1
MOLNG-2583	pachonfedmuscle_VS_surfacefedmuscle	Down	Biological Process	GO:0032269	negative regulation of cellular protein metabolic process	4/92	165/11822	0.0396937492398442	0.1547383444943081	0.1193291123445808	4	1.28	4/1.28	ENSAMXG00000005905/ENSAMXG00000031428/ENSAMXG00000032400/ENSAMXG00000019600	itih2//zgc:162989/c3a.1
MOLNG-2583	pachonfedmuscle_VS_surfacefedmuscle	Down	Biological Process	GO:0044092	negative regulation of molecular function	4/92	165/11822	0.0396937492398442	0.1547383444943081	0.1193291123445808	4	1.28	4/1.28	ENSAMXG00000005905/ENSAMXG00000031428/ENSAMXG00000032400/ENSAMXG00000019600	itih2//zgc:162989/c3a.1
MOLNG-2583	pachonfedmuscle_VS_surfacefedmuscle	Down	Biological Process	GO:0051248	negative regulation of protein metabolic process	4/92	165/11822	0.0396937492398442	0.1547383444943081	0.1193291123445808	4	1.28	4/1.28	ENSAMXG00000005905/ENSAMXG00000031428/ENSAMXG00000032400/ENSAMXG00000019600	itih2//zgc:162989/c3a.1
MOLNG-2583	pachonfedmuscle_VS_surfacefedmuscle	Down	Biological Process	GO:0009141	nucleoside triphosphate metabolic process	2/92	41/11822	0.0403702746314573	0.1560531624409275	0.120343056619205	2	0.32	2/0.32	ENSAMXG00000007505/ENSAMXG00000034136	uckl1a/nme2b.1
MOLNG-2583	pachonfedmuscle_VS_surfacefedmuscle	Down	Biological Process	GO:0009100	glycoprotein metabolic process	4/92	167/11822	0.0411939764538453	0.1579102430730739	0.1217751760082973	4	1.3	4/1.3	ENSAMXG00000043738/ENSAMXG00000013135/ENSAMXG00000043679/ENSAMXG00000029919	st6gal2b/galnt8a.1//b3gnt3.4
MOLNG-2583	pachonfedmuscle_VS_surfacefedmuscle	Down	Biological Process	GO:0030162	regulation of proteolysis	3/92	103/11822	0.0462151023728302	0.1756937776157182	0.135489251845531	3	0.8	3/0.8	ENSAMXG00000005905/ENSAMXG00000031428/ENSAMXG00000019600	itih2//c3a.1
MOLNG-2583	pachonfedmuscle_VS_surfacefedmuscle	Down	Biological Process	GO:0098742	cell-cell adhesion via plasma-membrane adhesion molecules	3/92	104/11822	0.0473282318784282	0.178450710361287	0.1376153075326172	3	0.81	3/0.81	ENSAMXG00000018475/ENSAMXG00000035912/ENSAMXG00000032255	//
MOLNG-2583	pachonfedmuscle_VS_surfacefedmuscle	Down	Biological Process	GO:1901565	organonitrogen compound catabolic process	5/92	254/11822	0.0479486753881258	0.1793202494190073	0.1382858674009278	5	1.98	5/1.98	ENSAMXG00000014431/ENSAMXG00000000399/ENSAMXG00000034539/ENSAMXG00000005720/ENSAMXG00000034365	gldc//cdaa/ggt5a/gcshb
MOLNG-2583	pachonfedliver_VS_surfacefedliver	UP	Molecular Functions	GO:0005520	insulin-like growth factor binding	7/405	34/13591	5.310727623625378e-05	0.0183220103015075	0.0179446691282499	7	1.01	7/1.01	ENSAMXG00000009512/ENSAMXG00000018010/ENSAMXG00000034029/ENSAMXG00000005447/ENSAMXG00000002035/ENSAMXG00000015267/ENSAMXG00000021415	igfbp1a/ccn1/igfbp2b/ccn1l2//si:ch211-106h11.3/igf1rb
MOLNG-2583	pachonfedliver_VS_surfacefedliver	UP	Molecular Functions	GO:0019838	growth factor binding	7/405	44/13591	0.00029270440393304627	0.0504915096784504	0.0494516387697409	7	1.31	7/1.31	ENSAMXG00000009512/ENSAMXG00000018010/ENSAMXG00000034029/ENSAMXG00000005447/ENSAMXG00000002035/ENSAMXG00000015267/ENSAMXG00000021415	igfbp1a/ccn1/igfbp2b/ccn1l2//si:ch211-106h11.3/igf1rb
MOLNG-2583	pachonfedliver_VS_surfacefedliver	UP	Molecular Functions	GO:0016791	phosphatase activity	17/405	262/13591	0.0022437223524273	0.2376358369648071	0.2327417350593534	17	7.81	17/7.81	ENSAMXG00000037235/ENSAMXG00000001046/ENSAMXG00000016917/ENSAMXG00000035124/ENSAMXG00000018088/ENSAMXG00000041350/ENSAMXG00000021586/ENSAMXG00000000789/ENSAMXG00000036588/ENSAMXG00000033439/ENSAMXG00000013469/ENSAMXG00000041890/ENSAMXG00000004431/ENSAMXG00000032749/ENSAMXG00000009745/ENSAMXG00000034720/ENSAMXG00000042517	si:ch211-223p8.8/pfkfb2a/ca16b/inpp5jb/lpin2/ptp4a3b/ptprsa/ptpro/mtmr1b/hdhd2/PTPRB/ppm1ab/ptpdc1a/si:ch73-21k16.1/PTPN14/ptpn20/
MOLNG-2583	pachonfedliver_VS_surfacefedliver	UP	Molecular Functions	GO:0004725	protein tyrosine phosphatase activity	10/405	118/13591	0.0027551981097368	0.2376358369648071	0.2327417350593534	10	3.52	10/3.52	ENSAMXG00000037235/ENSAMXG00000016917/ENSAMXG00000021586/ENSAMXG00000000789/ENSAMXG00000036588/ENSAMXG00000013469/ENSAMXG00000004431/ENSAMXG00000009745/ENSAMXG00000034720/ENSAMXG00000042517	si:ch211-223p8.8/ca16b/ptprsa/ptpro/mtmr1b/PTPRB/ptpdc1a/PTPN14/ptpn20/
MOLNG-2583	pachonfedliver_VS_surfacefedliver	UP	Molecular Functions	GO:0016779	nucleotidyltransferase activity	9/405	108/13591	0.0049345520058237	0.3404840884018367	0.3334718302882977	9	3.22	9/3.22	ENSAMXG00000040932/ENSAMXG00000039114/ENSAMXG00000017691/ENSAMXG00000031305/ENSAMXG00000011740/ENSAMXG00000040944/ENSAMXG00000038047/ENSAMXG00000020012/ENSAMXG00000011503	//tent4a//gphna///selenoo1/uap1
MOLNG-2583	pachonfedliver_VS_surfacefedliver	UP	Molecular Functions	GO:0042578	phosphoric ester hydrolase activity	19/405	343/13591	0.0071946902085849	0.3946820456146979	0.3865535824327018	19	10.22	19/10.22	ENSAMXG00000037235/ENSAMXG00000001046/ENSAMXG00000016917/ENSAMXG00000035124/ENSAMXG00000044082/ENSAMXG00000018088/ENSAMXG00000041350/ENSAMXG00000021586/ENSAMXG00000000789/ENSAMXG00000036588/ENSAMXG00000006086/ENSAMXG00000033439/ENSAMXG00000013469/ENSAMXG00000041890/ENSAMXG00000004431/ENSAMXG00000032749/ENSAMXG00000009745/ENSAMXG00000034720/ENSAMXG00000042517	si:ch211-223p8.8/pfkfb2a/ca16b/inpp5jb/plcd3b/lpin2/ptp4a3b/ptprsa/ptpro/mtmr1b/PLCB4/hdhd2/PTPRB/ppm1ab/ptpdc1a/si:ch73-21k16.1/PTPN14/ptpn20/
MOLNG-2583	pachonfedliver_VS_surfacefedliver	UP	Molecular Functions	GO:0004721	phosphoprotein phosphatase activity	12/405	181/13591	0.0080650582864734	0.3946820456146979	0.3865535824327018	12	5.39	12/5.39	ENSAMXG00000037235/ENSAMXG00000016917/ENSAMXG00000041350/ENSAMXG00000021586/ENSAMXG00000000789/ENSAMXG00000036588/ENSAMXG00000013469/ENSAMXG00000041890/ENSAMXG00000004431/ENSAMXG00000009745/ENSAMXG00000034720/ENSAMXG00000042517	si:ch211-223p8.8/ca16b/ptp4a3b/ptprsa/ptpro/mtmr1b/PTPRB/ppm1ab/ptpdc1a/PTPN14/ptpn20/
MOLNG-2583	pachonfedliver_VS_surfacefedliver	UP	Molecular Functions	GO:0004312	fatty acid synthase activity	3/405	15/13591	0.0091520474345437	0.3946820456146979	0.3865535824327018	3	0.45	3/0.45	ENSAMXG00000037372/ENSAMXG00000001318/ENSAMXG00000034182	elovl6//zgc:92749
MOLNG-2583	pachonfedliver_VS_surfacefedliver	UP	Molecular Functions	GO:0019205	nucleobase-containing compound kinase activity	4/405	34/13591	0.0177868128046951	0.5916900297352028	0.5795041938825327	4	1.01	4/1.01	ENSAMXG00000031997/ENSAMXG00000017490/ENSAMXG00000002803/ENSAMXG00000032464	ak8/uckl1b/ak2/
MOLNG-2583	pachonfedliver_VS_surfacefedliver	UP	Molecular Functions	GO:0071949	FAD binding	3/405	19/13591	0.0178505419196164	0.5916900297352028	0.5795041938825327	3	0.57	3/0.57	ENSAMXG00000013702/ENSAMXG00000001280/ENSAMXG00000013076	dao.3/mical1/mical2b
MOLNG-2583	pachonfedliver_VS_surfacefedliver	UP	Molecular Functions	GO:0016891	endoribonuclease activity, producing 5'-phosphomonoesters	3/405	20/13591	0.0205459505388307	0.5916900297352028	0.5795041938825327	3	0.6	3/0.6	ENSAMXG00000040932/ENSAMXG00000038483/ENSAMXG00000038047	//
MOLNG-2583	pachonfedliver_VS_surfacefedliver	UP	Molecular Functions	GO:0003697	single-stranded DNA binding	3/405	21/13591	0.0234521341580213	0.5916900297352028	0.5795041938825327	3	0.63	3/0.63	ENSAMXG00000012564/ENSAMXG00000037327/ENSAMXG00000013672	stn1/ten1/rad51
MOLNG-2583	pachonfedliver_VS_surfacefedliver	UP	Molecular Functions	GO:0003964	RNA-directed DNA polymerase activity	3/405	22/13591	0.0265690761114306	0.5916900297352028	0.5795041938825327	3	0.66	3/0.66	ENSAMXG00000039114/ENSAMXG00000031305/ENSAMXG00000040944	//
MOLNG-2583	pachonfedliver_VS_surfacefedliver	UP	Molecular Functions	GO:0048037	cofactor binding	18/405	370/13591	0.0287780593653132	0.5916900297352028	0.5795041938825327	18	11.03	18/11.03	ENSAMXG00000017574/ENSAMXG00000035565/ENSAMXG00000020784/ENSAMXG00000003540/ENSAMXG00000017509/ENSAMXG00000040266/ENSAMXG00000013702/ENSAMXG00000012538/ENSAMXG00000043827/ENSAMXG00000014390/ENSAMXG00000001280/ENSAMXG00000038532/ENSAMXG00000003161/ENSAMXG00000018746/ENSAMXG00000001375/ENSAMXG00000013076/ENSAMXG00000009950/ENSAMXG00000038014	accs/cyp3a65/cyp1a/p3h1/g6pd/pgd/dao.3/kyat3//adgb/mical1//acad8/lias//mical2b//
MOLNG-2583	pachonfedliver_VS_surfacefedliver	UP	Molecular Functions	GO:0016893	endonuclease activity, active with either ribo- or deoxyribonucleic acids and producing 5'-phosphomonoesters	3/405	23/13591	0.0298961342712505	0.5916900297352028	0.5795041938825327	3	0.69	3/0.69	ENSAMXG00000040932/ENSAMXG00000038483/ENSAMXG00000038047	//
MOLNG-2583	pachonfedliver_VS_surfacefedliver	UP	Molecular Functions	GO:0015171	amino acid transmembrane transporter activity	2/405	10/13591	0.0340258373547584	0.5916900297352028	0.5795041938825327	2	0.3	2/0.3	ENSAMXG00000014532/ENSAMXG00000014059	slc25a13/slc16a10
MOLNG-2583	pachonfedliver_VS_surfacefedliver	UP	Molecular Functions	GO:0015291	secondary active transmembrane transporter activity	8/405	127/13591	0.0361760834892023	0.5916900297352028	0.5795041938825327	8	3.78	8/3.78	ENSAMXG00000012506/ENSAMXG00000010974/ENSAMXG00000016875/ENSAMXG00000017442/ENSAMXG00000002038/ENSAMXG00000014059/ENSAMXG00000012634/ENSAMXG00000040557	SLC12A2/mfsd2ab/slc28a1/slc6a8/si:ch211-117c9.5/slc16a10/slc4a2a/slc26a2
MOLNG-2583	pachonfedliver_VS_surfacefedliver	UP	Molecular Functions	GO:0004519	endonuclease activity	5/405	62/13591	0.0370965563758492	0.5916900297352028	0.5795041938825327	5	1.85	5/1.85	ENSAMXG00000040932/ENSAMXG00000001736/ENSAMXG00000032808/ENSAMXG00000038483/ENSAMXG00000038047	/zc3h12a/endog//
MOLNG-2583	pachonfedliver_VS_surfacefedliver	UP	Molecular Functions	GO:0050145	nucleoside monophosphate kinase activity	2/405	11/13591	0.0407813839793819	0.5916900297352028	0.5795041938825327	2	0.33	2/0.33	ENSAMXG00000031997/ENSAMXG00000002803	ak8/ak2
MOLNG-2583	pachonfedliver_VS_surfacefedliver	UP	Molecular Functions	GO:0019199	transmembrane receptor protein kinase activity	6/405	85/13591	0.0411729214255903	0.5916900297352028	0.5795041938825327	6	2.53	6/2.53	ENSAMXG00000040779/ENSAMXG00000031359/ENSAMXG00000006406/ENSAMXG00000015547/ENSAMXG00000014301/ENSAMXG00000021415	tgfbr2a/ddr2l/epha4l/fgfr1a/flt1/igf1rb
MOLNG-2583	pachonfedliver_VS_surfacefedliver	UP	Molecular Functions	GO:0016712	oxidoreductase activity, acting on paired donors, with incorporation or reduction of molecular oxygen, reduced flavin or flavoprotein as one donor, and incorporation of one atom of oxygen	3/405	27/13591	0.0452735192860276	0.5916900297352028	0.5795041938825327	3	0.8	3/0.8	ENSAMXG00000035565/ENSAMXG00000020784/ENSAMXG00000043827	cyp3a65/cyp1a/
MOLNG-2583	pachonfedliver_VS_surfacefedliver	UP	Molecular Functions	GO:0004714	transmembrane receptor protein tyrosine kinase activity	5/405	66/13591	0.0465989235158027	0.5916900297352028	0.5795041938825327	5	1.97	5/1.97	ENSAMXG00000031359/ENSAMXG00000006406/ENSAMXG00000015547/ENSAMXG00000014301/ENSAMXG00000021415	ddr2l/epha4l/fgfr1a/flt1/igf1rb
MOLNG-2583	pachonfedliver_VS_surfacefedliver	UP	Molecular Functions	GO:0015293	symporter activity	5/405	66/13591	0.0465989235158027	0.5916900297352028	0.5795041938825327	5	1.97	5/1.97	ENSAMXG00000012506/ENSAMXG00000010974/ENSAMXG00000016875/ENSAMXG00000017442/ENSAMXG00000002038	SLC12A2/mfsd2ab/slc28a1/slc6a8/si:ch211-117c9.5
MOLNG-2583	pachonfedliver_VS_surfacefedliver	UP	Molecular Functions	GO:0019206	nucleoside kinase activity	2/405	12/13591	0.0479919599484489	0.5916900297352028	0.5795041938825327	2	0.36	2/0.36	ENSAMXG00000017490/ENSAMXG00000032464	uckl1b/
MOLNG-2583	pachonfedliver_VS_surfacefedliver	UP	Biological Process	GO:0015074	DNA integration	13/354	86/11822	1.5082132945167517e-06	0.0018400202193104	0.0018400202193104	13	2.58	13/2.58	ENSAMXG00000036506/ENSAMXG00000035494/ENSAMXG00000040932/ENSAMXG00000033138/ENSAMXG00000039114/ENSAMXG00000040613/ENSAMXG00000037931/ENSAMXG00000031305/ENSAMXG00000035834/ENSAMXG00000035335/ENSAMXG00000038483/ENSAMXG00000043821/ENSAMXG00000038047	////////////
MOLNG-2583	pachonfedliver_VS_surfacefedliver	UP	Biological Process	GO:0006865	amino acid transport	5/354	26/11822	0.0009161858801118314	0.5588733868682172	0.5588733868682172	5	0.78	5/0.78	ENSAMXG00000031260/ENSAMXG00000012045/ENSAMXG00000014532/ENSAMXG00000014059/ENSAMXG00000008298	slc7a1a/sfxn2/slc25a13/slc16a10/slc7a3b
MOLNG-2583	pachonfedliver_VS_surfacefedliver	UP	Biological Process	GO:0006633	fatty acid biosynthetic process	5/354	33/11822	0.0027846879788049	0.896143491457049	0.896143491457049	5	0.99	5/0.99	ENSAMXG00000037372/ENSAMXG00000001318/ENSAMXG00000039819/ENSAMXG00000034182/ENSAMXG00000018746	elovl6//scdb/zgc:92749/lias
MOLNG-2583	pachonfedliver_VS_surfacefedliver	UP	Biological Process	GO:0006739	NADP metabolic process	3/354	11/11822	0.0036727192272829	0.896143491457049	0.896143491457049	3	0.33	3/0.33	ENSAMXG00000017509/ENSAMXG00000040266/ENSAMXG00000043879	g6pd/pgd/taldo1
MOLNG-2583	pachonfedliver_VS_surfacefedliver	UP	Biological Process	GO:0042446	hormone biosynthetic process	3/354	11/11822	0.0036727192272829	0.896143491457049	0.896143491457049	3	0.33	3/0.33	ENSAMXG00000037805/ENSAMXG00000038493/ENSAMXG00000005286	hsd17b3/dio1/
MOLNG-2583	pachonfedliver_VS_surfacefedliver	UP	Biological Process	GO:0016311	dephosphorylation	18/354	310/11822	0.005675865869936	0.9137385919745292	0.9137385919745292	18	9.28	18/9.28	ENSAMXG00000037235/ENSAMXG00000001046/ENSAMXG00000016917/ENSAMXG00000035124/ENSAMXG00000018088/ENSAMXG00000041350/ENSAMXG00000021586/ENSAMXG00000000789/ENSAMXG00000036588/ENSAMXG00000033439/ENSAMXG00000013469/ENSAMXG00000042566/ENSAMXG00000041890/ENSAMXG00000004431/ENSAMXG00000032749/ENSAMXG00000009745/ENSAMXG00000034720/ENSAMXG00000042517	si:ch211-223p8.8/pfkfb2a/ca16b/inpp5jb/lpin2/ptp4a3b/ptprsa/ptpro/mtmr1b/hdhd2/PTPRB//ppm1ab/ptpdc1a/si:ch73-21k16.1/PTPN14/ptpn20/
MOLNG-2583	pachonfedliver_VS_surfacefedliver	UP	Biological Process	GO:0006368	transcription elongation from RNA polymerase II promoter	3/354	13/11822	0.00608911058103	0.9137385919745292	0.9137385919745292	3	0.39	3/0.39	ENSAMXG00000007420/ENSAMXG00000017724/ENSAMXG00000029267	si:ch211-13k12.2/ell/
MOLNG-2583	pachonfedliver_VS_surfacefedliver	UP	Biological Process	GO:0007254	JNK cascade	3/354	14/11822	0.0075797313184022	0.9137385919745292	0.9137385919745292	3	0.42	3/0.42	ENSAMXG00000018118/ENSAMXG00000014645/ENSAMXG00000041131	wu:fi36a10/map3k12/sh3rf2
MOLNG-2583	pachonfedliver_VS_surfacefedliver	UP	Biological Process	GO:0006259	DNA metabolic process	19/354	344/11822	0.0076730403038827	0.9137385919745292	0.9137385919745292	19	10.3	19/10.3	ENSAMXG00000012564/ENSAMXG00000036506/ENSAMXG00000035494/ENSAMXG00000040932/ENSAMXG00000033138/ENSAMXG00000039114/ENSAMXG00000018571/ENSAMXG00000015192/ENSAMXG00000040613/ENSAMXG00000037931/ENSAMXG00000031305/ENSAMXG00000035834/ENSAMXG00000035335/ENSAMXG00000011367/ENSAMXG00000038483/ENSAMXG00000040944/ENSAMXG00000043821/ENSAMXG00000038047/ENSAMXG00000013672	stn1//////rtel1/parp3//////helb/////rad51
MOLNG-2583	pachonfedliver_VS_surfacefedliver	UP	Biological Process	GO:0006354	DNA-templated transcription, elongation	3/354	16/11822	0.0111561721921282	0.9137385919745292	0.9137385919745292	3	0.48	3/0.48	ENSAMXG00000007420/ENSAMXG00000017724/ENSAMXG00000029267	si:ch211-13k12.2/ell/
MOLNG-2583	pachonfedliver_VS_surfacefedliver	UP	Biological Process	GO:0046942	carboxylic acid transport	6/354	64/11822	0.0120360807679542	0.9137385919745292	0.9137385919745292	6	1.92	6/1.92	ENSAMXG00000031260/ENSAMXG00000012045/ENSAMXG00000014532/ENSAMXG00000014059/ENSAMXG00000008298/ENSAMXG00000003998	slc7a1a/sfxn2/slc25a13/slc16a10/slc7a3b/proca1
MOLNG-2583	pachonfedliver_VS_surfacefedliver	UP	Biological Process	GO:0015849	organic acid transport	6/354	66/11822	0.0138822057140504	0.9137385919745292	0.9137385919745292	6	1.98	6/1.98	ENSAMXG00000031260/ENSAMXG00000012045/ENSAMXG00000014532/ENSAMXG00000014059/ENSAMXG00000008298/ENSAMXG00000003998	slc7a1a/sfxn2/slc25a13/slc16a10/slc7a3b/proca1
MOLNG-2583	pachonfedliver_VS_surfacefedliver	UP	Biological Process	GO:1903522	regulation of blood circulation	5/354	48/11822	0.0139570792627085	0.9137385919745292	0.9137385919745292	5	1.44	5/1.44	ENSAMXG00000032596/ENSAMXG00000040548/ENSAMXG00000021379/ENSAMXG00000014301/ENSAMXG00000040461	/grk3/scn5lab/flt1/edn2
MOLNG-2583	pachonfedliver_VS_surfacefedliver	UP	Biological Process	GO:0044255	cellular lipid metabolic process	18/354	340/11822	0.0139593911480111	0.9137385919745292	0.9137385919745292	18	10.18	18/10.18	ENSAMXG00000037372/ENSAMXG00000016009/ENSAMXG00000001318/ENSAMXG00000012399/ENSAMXG00000005517/ENSAMXG00000039819/ENSAMXG00000035124/ENSAMXG00000037012/ENSAMXG00000034182/ENSAMXG00000036588/ENSAMXG00000004209/ENSAMXG00000018746/ENSAMXG00000013752/ENSAMXG00000020897/ENSAMXG00000032749/ENSAMXG00000019276/ENSAMXG00000029221/ENSAMXG00000003998	elovl6/pip5k1ca//sphk2/pla2g4aa/scdb/inpp5jb/dgat1b/zgc:92749/mtmr1b/pik3cg/lias/gpam/pip5k1ba/si:ch73-21k16.1/gal3st1b/b4galnt1a/proca1
MOLNG-2583	pachonfedliver_VS_surfacefedliver	UP	Biological Process	GO:0015711	organic anion transport	9/354	129/11822	0.015416925055908	0.9137385919745292	0.9137385919745292	9	3.86	9/3.86	ENSAMXG00000000830/ENSAMXG00000000590/ENSAMXG00000010974/ENSAMXG00000031260/ENSAMXG00000012045/ENSAMXG00000014532/ENSAMXG00000014059/ENSAMXG00000008298/ENSAMXG00000003998	oatx/atp8b4/mfsd2ab/slc7a1a/sfxn2/slc25a13/slc16a10/slc7a3b/proca1
MOLNG-2583	pachonfedliver_VS_surfacefedliver	UP	Biological Process	GO:0006629	lipid metabolic process	23/354	479/11822	0.0174963855989567	0.9137385919745292	0.9137385919745292	23	14.34	23/14.34	ENSAMXG00000037372/ENSAMXG00000016009/ENSAMXG00000001318/ENSAMXG00000012399/ENSAMXG00000037805/ENSAMXG00000005517/ENSAMXG00000039819/ENSAMXG00000035124/ENSAMXG00000044082/ENSAMXG00000037012/ENSAMXG00000034182/ENSAMXG00000036588/ENSAMXG00000002796/ENSAMXG00000006086/ENSAMXG00000004209/ENSAMXG00000003161/ENSAMXG00000018746/ENSAMXG00000013752/ENSAMXG00000020897/ENSAMXG00000032749/ENSAMXG00000019276/…	elovl6/pip5k1ca//sphk2/hsd17b3/pla2g4aa/scdb/inpp5jb/plcd3b/dgat1b/zgc:92749/mtmr1b/LPL/PLCB4/pik3cg/acad8/lias/gpam/pip5k1ba/si:ch73-21k16.1/gal3st1b/b4galnt1a/proca1
MOLNG-2583	pachonfedliver_VS_surfacefedliver	UP	Biological Process	GO:0072330	monocarboxylic acid biosynthetic process	5/354	51/11822	0.0178117628926774	0.9137385919745292	0.9137385919745292	5	1.53	5/1.53	ENSAMXG00000037372/ENSAMXG00000001318/ENSAMXG00000039819/ENSAMXG00000034182/ENSAMXG00000018746	elovl6//scdb/zgc:92749/lias
MOLNG-2583	pachonfedliver_VS_surfacefedliver	UP	Biological Process	GO:0006470	protein dephosphorylation	13/354	225/11822	0.0179892151665732	0.9137385919745292	0.9137385919745292	13	6.74	13/6.74	ENSAMXG00000037235/ENSAMXG00000016917/ENSAMXG00000041350/ENSAMXG00000021586/ENSAMXG00000000789/ENSAMXG00000036588/ENSAMXG00000013469/ENSAMXG00000042566/ENSAMXG00000041890/ENSAMXG00000004431/ENSAMXG00000009745/ENSAMXG00000034720/ENSAMXG00000042517	si:ch211-223p8.8/ca16b/ptp4a3b/ptprsa/ptpro/mtmr1b/PTPRB//ppm1ab/ptpdc1a/PTPN14/ptpn20/
MOLNG-2583	pachonfedliver_VS_surfacefedliver	UP	Biological Process	GO:0031098	stress-activated protein kinase signaling cascade	3/354	19/11822	0.0180687527007761	0.9137385919745292	0.9137385919745292	3	0.57	3/0.57	ENSAMXG00000018118/ENSAMXG00000014645/ENSAMXG00000041131	wu:fi36a10/map3k12/sh3rf2
MOLNG-2583	pachonfedliver_VS_surfacefedliver	UP	Biological Process	GO:0051403	stress-activated MAPK cascade	3/354	19/11822	0.0180687527007761	0.9137385919745292	0.9137385919745292	3	0.57	3/0.57	ENSAMXG00000018118/ENSAMXG00000014645/ENSAMXG00000041131	wu:fi36a10/map3k12/sh3rf2
MOLNG-2583	pachonfedliver_VS_surfacefedliver	UP	Biological Process	GO:0035335	peptidyl-tyrosine dephosphorylation	8/354	112/11822	0.019161452189396	0.9137385919745292	0.9137385919745292	8	3.35	8/3.35	ENSAMXG00000037235/ENSAMXG00000016917/ENSAMXG00000021586/ENSAMXG00000000789/ENSAMXG00000036588/ENSAMXG00000013469/ENSAMXG00000004431/ENSAMXG00000042517	si:ch211-223p8.8/ca16b/ptprsa/ptpro/mtmr1b/PTPRB/ptpdc1a/
MOLNG-2583	pachonfedliver_VS_surfacefedliver	UP	Biological Process	GO:0008610	lipid biosynthetic process	10/354	158/11822	0.0204728866393282	0.9137385919745292	0.9137385919745292	10	4.73	10/4.73	ENSAMXG00000037372/ENSAMXG00000001318/ENSAMXG00000037805/ENSAMXG00000039819/ENSAMXG00000037012/ENSAMXG00000034182/ENSAMXG00000018746/ENSAMXG00000013752/ENSAMXG00000032749/ENSAMXG00000019276	elovl6//hsd17b3/scdb/dgat1b/zgc:92749/lias/gpam/si:ch73-21k16.1/gal3st1b
MOLNG-2583	pachonfedliver_VS_surfacefedliver	UP	Biological Process	GO:0007187	G protein-coupled receptor signaling pathway, coupled to cyclic nucleotide second messenger	3/354	20/11822	0.0207953385156786	0.9137385919745292	0.9137385919745292	3	0.6	3/0.6	ENSAMXG00000018022/ENSAMXG00000043516/ENSAMXG00000025558	gnai1/ghrhra/lpar6a
MOLNG-2583	pachonfedliver_VS_surfacefedliver	UP	Biological Process	GO:0007188	adenylate cyclase-modulating G protein-coupled receptor signaling pathway	3/354	20/11822	0.0207953385156786	0.9137385919745292	0.9137385919745292	3	0.6	3/0.6	ENSAMXG00000018022/ENSAMXG00000043516/ENSAMXG00000025558	gnai1/ghrhra/lpar6a
MOLNG-2583	pachonfedliver_VS_surfacefedliver	UP	Biological Process	GO:0019637	organophosphate metabolic process	21/354	436/11822	0.0219119663165019	0.9137385919745292	0.9137385919745292	21	13.06	21/13.06	ENSAMXG00000031997/ENSAMXG00000037372/ENSAMXG00000016009/ENSAMXG00000001046/ENSAMXG00000005517/ENSAMXG00000017509/ENSAMXG00000035124/ENSAMXG00000040906/ENSAMXG00000017490/ENSAMXG00000040266/ENSAMXG00000002803/ENSAMXG00000011740/ENSAMXG00000036588/ENSAMXG00000004209/ENSAMXG00000011124/ENSAMXG00000013752/ENSAMXG00000020897/ENSAMXG00000031764/ENSAMXG00000043879/ENSAMXG00000003998/ENSAMXG00000032464	ak8/elovl6/pip5k1ca/pfkfb2a/pla2g4aa/g6pd/inpp5jb/impdh2/uckl1b/pgd/ak2/gphna/mtmr1b/pik3cg/pgam1b/gpam/pip5k1ba/ipmkb/taldo1/proca1/
MOLNG-2583	pachonfedliver_VS_surfacefedliver	UP	Biological Process	GO:0010817	regulation of hormone levels	5/354	54/11822	0.022311388482842	0.9137385919745292	0.9137385919745292	5	1.62	5/1.62	ENSAMXG00000037805/ENSAMXG00000038493/ENSAMXG00000037012/ENSAMXG00000014059/ENSAMXG00000005286	hsd17b3/dio1/dgat1b/slc16a10/
MOLNG-2583	pachonfedliver_VS_surfacefedliver	UP	Biological Process	GO:0042445	hormone metabolic process	4/354	38/11822	0.0261875047965228	0.9137385919745292	0.9137385919745292	4	1.14	4/1.14	ENSAMXG00000037805/ENSAMXG00000038493/ENSAMXG00000037012/ENSAMXG00000005286	hsd17b3/dio1/dgat1b/
MOLNG-2583	pachonfedliver_VS_surfacefedliver	UP	Biological Process	GO:0006631	fatty acid metabolic process	6/354	77/11822	0.0276313472823989	0.9137385919745292	0.9137385919745292	6	2.31	6/2.31	ENSAMXG00000037372/ENSAMXG00000001318/ENSAMXG00000039819/ENSAMXG00000034182/ENSAMXG00000018746/ENSAMXG00000032749	elovl6//scdb/zgc:92749/lias/si:ch73-21k16.1
MOLNG-2583	pachonfedliver_VS_surfacefedliver	UP	Biological Process	GO:0046486	glycerolipid metabolic process	8/354	120/11822	0.0276446989008873	0.9137385919745292	0.9137385919745292	8	3.59	8/3.59	ENSAMXG00000016009/ENSAMXG00000035124/ENSAMXG00000037012/ENSAMXG00000036588/ENSAMXG00000004209/ENSAMXG00000013752/ENSAMXG00000020897/ENSAMXG00000032749	pip5k1ca/inpp5jb/dgat1b/mtmr1b/pik3cg/gpam/pip5k1ba/si:ch73-21k16.1
MOLNG-2583	pachonfedliver_VS_surfacefedliver	UP	Biological Process	GO:0006820	anion transport	12/354	219/11822	0.0321706267930421	0.9137385919745292	0.9137385919745292	12	6.56	12/6.56	ENSAMXG00000000830/ENSAMXG00000007569/ENSAMXG00000000590/ENSAMXG00000010974/ENSAMXG00000031260/ENSAMXG00000012045/ENSAMXG00000014532/ENSAMXG00000014059/ENSAMXG00000012634/ENSAMXG00000040557/ENSAMXG00000008298/ENSAMXG00000003998	oatx//atp8b4/mfsd2ab/slc7a1a/sfxn2/slc25a13/slc16a10/slc4a2a/slc26a2/slc7a3b/proca1
MOLNG-2583	pachonfedliver_VS_surfacefedliver	UP	Biological Process	GO:0030258	lipid modification	6/354	80/11822	0.0325396340869363	0.9137385919745292	0.9137385919745292	6	2.4	6/2.4	ENSAMXG00000016009/ENSAMXG00000035124/ENSAMXG00000036588/ENSAMXG00000004209/ENSAMXG00000020897/ENSAMXG00000029221	pip5k1ca/inpp5jb/mtmr1b/pik3cg/pip5k1ba/b4galnt1a
MOLNG-2583	pachonfedliver_VS_surfacefedliver	UP	Biological Process	GO:0001714	endodermal cell fate specification	2/354	10/11822	0.034323148317289	0.9137385919745292	0.9137385919745292	2	0.3	2/0.3	ENSAMXG00000038238/ENSAMXG00000015547	bmp4/fgfr1a
MOLNG-2583	pachonfedliver_VS_surfacefedliver	UP	Biological Process	GO:0006222	UMP biosynthetic process	2/354	10/11822	0.034323148317289	0.9137385919745292	0.9137385919745292	2	0.3	2/0.3	ENSAMXG00000017490/ENSAMXG00000032464	uckl1b/
MOLNG-2583	pachonfedliver_VS_surfacefedliver	UP	Biological Process	GO:0009173	pyrimidine ribonucleoside monophosphate metabolic process	2/354	10/11822	0.034323148317289	0.9137385919745292	0.9137385919745292	2	0.3	2/0.3	ENSAMXG00000017490/ENSAMXG00000032464	uckl1b/
MOLNG-2583	pachonfedliver_VS_surfacefedliver	UP	Biological Process	GO:0009174	pyrimidine ribonucleoside monophosphate biosynthetic process	2/354	10/11822	0.034323148317289	0.9137385919745292	0.9137385919745292	2	0.3	2/0.3	ENSAMXG00000017490/ENSAMXG00000032464	uckl1b/
MOLNG-2583	pachonfedliver_VS_surfacefedliver	UP	Biological Process	GO:0010454	negative regulation of cell fate commitment	2/354	10/11822	0.034323148317289	0.9137385919745292	0.9137385919745292	2	0.3	2/0.3	ENSAMXG00000038238/ENSAMXG00000015547	bmp4/fgfr1a
MOLNG-2583	pachonfedliver_VS_surfacefedliver	UP	Biological Process	GO:0046049	UMP metabolic process	2/354	10/11822	0.034323148317289	0.9137385919745292	0.9137385919745292	2	0.3	2/0.3	ENSAMXG00000017490/ENSAMXG00000032464	uckl1b/
MOLNG-2583	pachonfedliver_VS_surfacefedliver	UP	Biological Process	GO:0046677	response to antibiotic	2/354	10/11822	0.034323148317289	0.9137385919745292	0.9137385919745292	2	0.3	2/0.3	ENSAMXG00000042973/ENSAMXG00000015547	txndc12/fgfr1a
MOLNG-2583	pachonfedliver_VS_surfacefedliver	UP	Biological Process	GO:1903224	regulation of endodermal cell differentiation	2/354	10/11822	0.034323148317289	0.9137385919745292	0.9137385919745292	2	0.3	2/0.3	ENSAMXG00000038238/ENSAMXG00000015547	bmp4/fgfr1a
MOLNG-2583	pachonfedliver_VS_surfacefedliver	UP	Biological Process	GO:2000542	negative regulation of gastrulation	2/354	10/11822	0.034323148317289	0.9137385919745292	0.9137385919745292	2	0.3	2/0.3	ENSAMXG00000038238/ENSAMXG00000015547	bmp4/fgfr1a
MOLNG-2583	pachonfedliver_VS_surfacefedliver	UP	Biological Process	GO:0000038	very long-chain fatty acid metabolic process	2/354	11/11822	0.0411343547817349	0.9137385919745292	0.9137385919745292	2	0.33	2/0.33	ENSAMXG00000037372/ENSAMXG00000034182	elovl6/zgc:92749
MOLNG-2583	pachonfedliver_VS_surfacefedliver	UP	Biological Process	GO:0001711	endodermal cell fate commitment	2/354	11/11822	0.0411343547817349	0.9137385919745292	0.9137385919745292	2	0.33	2/0.33	ENSAMXG00000038238/ENSAMXG00000015547	bmp4/fgfr1a
MOLNG-2583	pachonfedliver_VS_surfacefedliver	UP	Biological Process	GO:0045992	negative regulation of embryonic development	2/354	11/11822	0.0411343547817349	0.9137385919745292	0.9137385919745292	2	0.33	2/0.33	ENSAMXG00000038238/ENSAMXG00000015547	bmp4/fgfr1a
MOLNG-2583	pachonfedliver_VS_surfacefedliver	UP	Biological Process	GO:0050708	regulation of protein secretion	2/354	11/11822	0.0411343547817349	0.9137385919745292	0.9137385919745292	2	0.33	2/0.33	ENSAMXG00000029295/ENSAMXG00000026012	/TLR5
MOLNG-2583	pachonfedliver_VS_surfacefedliver	UP	Biological Process	GO:0006278	RNA-dependent DNA biosynthetic process	3/354	26/11822	0.0416012247600761	0.9137385919745292	0.9137385919745292	3	0.78	3/0.78	ENSAMXG00000039114/ENSAMXG00000031305/ENSAMXG00000040944	//
MOLNG-2583	pachonfedliver_VS_surfacefedliver	UP	Biological Process	GO:0006220	pyrimidine nucleotide metabolic process	3/354	27/11822	0.0457958904733092	0.9137385919745292	0.9137385919745292	3	0.81	3/0.81	ENSAMXG00000017490/ENSAMXG00000013752/ENSAMXG00000032464	uckl1b/gpam/
MOLNG-2583	pachonfedliver_VS_surfacefedliver	UP	Biological Process	GO:0006221	pyrimidine nucleotide biosynthetic process	3/354	27/11822	0.0457958904733092	0.9137385919745292	0.9137385919745292	3	0.81	3/0.81	ENSAMXG00000017490/ENSAMXG00000013752/ENSAMXG00000032464	uckl1b/gpam/
MOLNG-2583	pachonfedliver_VS_surfacefedliver	UP	Biological Process	GO:0001819	positive regulation of cytokine production	2/354	12/11822	0.0484033901185982	0.9137385919745292	0.9137385919745292	2	0.36	2/0.36	ENSAMXG00000029295/ENSAMXG00000026012	/TLR5
MOLNG-2583	pachonfedliver_VS_surfacefedliver	UP	Biological Process	GO:0002791	regulation of peptide secretion	2/354	12/11822	0.0484033901185982	0.9137385919745292	0.9137385919745292	2	0.36	2/0.36	ENSAMXG00000029295/ENSAMXG00000026012	/TLR5
MOLNG-2583	pachonfedliver_VS_surfacefedliver	UP	Biological Process	GO:0009129	pyrimidine nucleoside monophosphate metabolic process	2/354	12/11822	0.0484033901185982	0.9137385919745292	0.9137385919745292	2	0.36	2/0.36	ENSAMXG00000017490/ENSAMXG00000032464	uckl1b/
MOLNG-2583	pachonfedliver_VS_surfacefedliver	UP	Biological Process	GO:0009130	pyrimidine nucleoside monophosphate biosynthetic process	2/354	12/11822	0.0484033901185982	0.9137385919745292	0.9137385919745292	2	0.36	2/0.36	ENSAMXG00000017490/ENSAMXG00000032464	uckl1b/
MOLNG-2583	pachonfedliver_VS_surfacefedliver	UP	Biological Process	GO:0042659	regulation of cell fate specification	2/354	12/11822	0.0484033901185982	0.9137385919745292	0.9137385919745292	2	0.36	2/0.36	ENSAMXG00000038238/ENSAMXG00000015547	bmp4/fgfr1a
MOLNG-2583	pachonfedliver_VS_surfacefedliver	UP	Biological Process	GO:0046328	regulation of JNK cascade	2/354	12/11822	0.0484033901185982	0.9137385919745292	0.9137385919745292	2	0.36	2/0.36	ENSAMXG00000018118/ENSAMXG00000041131	wu:fi36a10/sh3rf2
MOLNG-2583	pachonfedliver_VS_surfacefedliver	UP	Cellular Components	GO:0005887	integral component of plasma membrane	13/272	225/10711	0.0048897528290549	0.4388392495917831	0.4357887284923368	13	5.71	13/5.71	ENSAMXG00000005975/ENSAMXG00000003091/ENSAMXG00000016875/ENSAMXG00000025558/ENSAMXG00000016623/ENSAMXG00000014059/ENSAMXG00000014285/ENSAMXG00000006406/ENSAMXG00000021379/ENSAMXG00000021222/ENSAMXG00000014301/ENSAMXG00000000536/ENSAMXG00000021569	TENM2/robo3/slc28a1/lpar6a/itga5/slc16a10/itgb4/epha4l/scn5lab/TENM3/flt1/itga6b/chrm4a
MOLNG-2583	pachonfedliver_VS_surfacefedliver	UP	Cellular Components	GO:0008023	transcription elongation factor complex	3/272	16/10711	0.0070979311387133	0.4388392495917831	0.4357887284923368	3	0.41	3/0.41	ENSAMXG00000007420/ENSAMXG00000017724/ENSAMXG00000029267	si:ch211-13k12.2/ell/
MOLNG-2583	pachonfedliver_VS_surfacefedliver	UP	Cellular Components	GO:0031226	intrinsic component of plasma membrane	13/272	240/10711	0.0082799858413544	0.4388392495917831	0.4357887284923368	13	6.09	13/6.09	ENSAMXG00000005975/ENSAMXG00000003091/ENSAMXG00000016875/ENSAMXG00000025558/ENSAMXG00000016623/ENSAMXG00000014059/ENSAMXG00000014285/ENSAMXG00000006406/ENSAMXG00000021379/ENSAMXG00000021222/ENSAMXG00000014301/ENSAMXG00000000536/ENSAMXG00000021569	TENM2/robo3/slc28a1/lpar6a/itga5/slc16a10/itgb4/epha4l/scn5lab/TENM3/flt1/itga6b/chrm4a
MOLNG-2583	pachonfedliver_VS_surfacefedliver	UP	Cellular Components	GO:0005905	clathrin-coated pit	3/272	23/10711	0.0197018050830879	0.6189271871112865	0.614624813417365	3	0.58	3/0.58	ENSAMXG00000036289/ENSAMXG00000029385/ENSAMXG00000010387	cltcl1/clta/sh3bp4
MOLNG-2583	pachonfedliver_VS_surfacefedliver	UP	Cellular Components	GO:0005581	collagen trimer	3/272	24/10711	0.0221028238082989	0.6189271871112865	0.614624813417365	3	0.61	3/0.61	ENSAMXG00000015997/ENSAMXG00000002013/ENSAMXG00000013997	//col4a5
MOLNG-2583	pachonfedliver_VS_surfacefedliver	UP	Cellular Components	GO:0043235	receptor complex	4/272	49/10711	0.0352913669592833	0.6189271871112865	0.614624813417365	4	1.24	4/1.24	ENSAMXG00000040779/ENSAMXG00000016623/ENSAMXG00000014285/ENSAMXG00000000536	tgfbr2a/itga5/itgb4/itga6b
MOLNG-2583	pachonfedliver_VS_surfacefedliver	UP	Cellular Components	GO:0030125	clathrin vesicle coat	2/272	12/10711	0.0358543891947461	0.6189271871112865	0.614624813417365	2	0.3	2/0.3	ENSAMXG00000036289/ENSAMXG00000029385	cltcl1/clta
MOLNG-2583	pachonfedliver_VS_surfacefedliver	UP	Cellular Components	GO:0005793	endoplasmic reticulum-Golgi intermediate compartment	2/272	14/10711	0.0478238163009599	0.6189271871112865	0.614624813417365	2	0.36	2/0.36	ENSAMXG00000035598/ENSAMXG00000030932	tmed1b/tmed5
MOLNG-2583	pachonfedliver_VS_surfacefedliver	UP	Cellular Components	GO:0033116	endoplasmic reticulum-Golgi intermediate compartment membrane	2/272	14/10711	0.0478238163009599	0.6189271871112865	0.614624813417365	2	0.36	2/0.36	ENSAMXG00000035598/ENSAMXG00000030932	tmed1b/tmed5
MOLNG-2583	pachonfedliver_VS_surfacefedliver	Down	Molecular Functions	GO:0046906	tetrapyrrole binding	11/220	128/13591	7.216004562481011e-06	0.0016236010265582	0.0015799252094695	11	2.07	11/2.07	ENSAMXG00000037683/ENSAMXG00000032562/ENSAMXG00000006960/ENSAMXG00000006900/ENSAMXG00000035342/ENSAMXG00000013208/ENSAMXG00000006274/ENSAMXG00000006945/ENSAMXG00000041876/ENSAMXG00000005308/ENSAMXG00000034177	////////mmachc/cyp2ad6/cyp2r1
MOLNG-2583	pachonfedliver_VS_surfacefedliver	Down	Molecular Functions	GO:0020037	heme binding	10/220	124/13591	3.290473943342558e-05	0.0037017831862603	0.0036022030537644	10	2.01	10/2.01	ENSAMXG00000037683/ENSAMXG00000032562/ENSAMXG00000006960/ENSAMXG00000006900/ENSAMXG00000035342/ENSAMXG00000013208/ENSAMXG00000006274/ENSAMXG00000006945/ENSAMXG00000005308/ENSAMXG00000034177	////////cyp2ad6/cyp2r1
MOLNG-2583	pachonfedliver_VS_surfacefedliver	Down	Molecular Functions	GO:0016705	oxidoreductase activity, acting on paired donors, with incorporation or reduction of molecular oxygen	10/220	143/13591	0.00011030435247657228	0.0082728264357429	0.0080502825667112	10	2.31	10/2.31	ENSAMXG00000037683/ENSAMXG00000032562/ENSAMXG00000006960/ENSAMXG00000006900/ENSAMXG00000035342/ENSAMXG00000013208/ENSAMXG00000038561/ENSAMXG00000006945/ENSAMXG00000005308/ENSAMXG00000034177	////////cyp2ad6/cyp2r1
MOLNG-2583	pachonfedliver_VS_surfacefedliver	Down	Molecular Functions	GO:0004497	monooxygenase activity	8/220	99/13591	0.00020082802382170384	0.0112965763399708	0.0109926918302406	8	1.6	8/1.6	ENSAMXG00000037683/ENSAMXG00000032562/ENSAMXG00000006900/ENSAMXG00000035342/ENSAMXG00000013208/ENSAMXG00000006945/ENSAMXG00000005308/ENSAMXG00000034177	//////cyp2ad6/cyp2r1
MOLNG-2583	pachonfedliver_VS_surfacefedliver	Down	Molecular Functions	GO:0048037	cofactor binding	16/220	370/13591	0.00034884003711991435	0.0156978016703961	0.0152755216254615	16	5.99	16/5.99	ENSAMXG00000040662/ENSAMXG00000037683/ENSAMXG00000032562/ENSAMXG00000005262/ENSAMXG00000006960/ENSAMXG00000006900/ENSAMXG00000035342/ENSAMXG00000013208/ENSAMXG00000032924/ENSAMXG00000006274/ENSAMXG00000006945/ENSAMXG00000041876/ENSAMXG00000007438/ENSAMXG00000017272/ENSAMXG00000005308/ENSAMXG00000034177	zgc:136493////////dus4l///mmachc/IDH2/rsad2/cyp2ad6/cyp2r1
MOLNG-2583	pachonfedliver_VS_surfacefedliver	Down	Molecular Functions	GO:0005506	iron ion binding	9/220	143/13591	0.0005297575067305792	0.0198659065023967	0.019331501999993	9	2.31	9/2.31	ENSAMXG00000037683/ENSAMXG00000032562/ENSAMXG00000006960/ENSAMXG00000006900/ENSAMXG00000035342/ENSAMXG00000013208/ENSAMXG00000006945/ENSAMXG00000005308/ENSAMXG00000034177	///////cyp2ad6/cyp2r1
MOLNG-2583	pachonfedliver_VS_surfacefedliver	Down	Molecular Functions	GO:0008175	tRNA methyltransferase activity	3/220	14/13591	0.0013348138306017	0.0429047302693433	0.0417505679346124	3	0.23	3/0.23	ENSAMXG00000029671/ENSAMXG00000040010/ENSAMXG00000037663	trmt9b/trmt10b/ftsj1
MOLNG-2583	pachonfedliver_VS_surfacefedliver	Down	Molecular Functions	GO:0008009	chemokine activity	4/220	45/13591	0.0059225830624035	0.1480645765600881	0.1440815528631501	4	0.73	4/0.73	ENSAMXG00000032754/ENSAMXG00000033264/ENSAMXG00000040620/ENSAMXG00000005533	///
MOLNG-2583	pachonfedliver_VS_surfacefedliver	Down	Molecular Functions	GO:0042379	chemokine receptor binding	4/220	45/13591	0.0059225830624035	0.1480645765600881	0.1440815528631501	4	0.73	4/0.73	ENSAMXG00000032754/ENSAMXG00000033264/ENSAMXG00000040620/ENSAMXG00000005533	///
MOLNG-2583	pachonfedliver_VS_surfacefedliver	Down	Molecular Functions	GO:0008173	RNA methyltransferase activity	3/220	36/13591	0.0201753623125565	0.4539456520325217	0.4417342485275533	3	0.58	3/0.58	ENSAMXG00000029671/ENSAMXG00000040010/ENSAMXG00000037663	trmt9b/trmt10b/ftsj1
MOLNG-2583	pachonfedliver_VS_surfacefedliver	Down	Molecular Functions	GO:0005125	cytokine activity	4/220	67/13591	0.0231651652898419	0.4558195678123407	0.4435577548770379	4	1.08	4/1.08	ENSAMXG00000032754/ENSAMXG00000033264/ENSAMXG00000040620/ENSAMXG00000005533	///
MOLNG-2583	pachonfedliver_VS_surfacefedliver	Down	Molecular Functions	GO:0001664	G protein-coupled receptor binding	4/220	68/13591	0.0243103769499915	0.4558195678123407	0.4435577548770379	4	1.1	4/1.1	ENSAMXG00000032754/ENSAMXG00000033264/ENSAMXG00000040620/ENSAMXG00000005533	///
MOLNG-2583	pachonfedliver_VS_surfacefedliver	Down	Molecular Functions	GO:0016780	phosphotransferase activity, for other substituted phosphate groups	2/220	16/13591	0.0269624786221309	0.4666582838445749	0.4541049031095747	2	0.26	2/0.26	ENSAMXG00000013424/ENSAMXG00000030966	ptdss2/chpt1
MOLNG-2583	pachonfedliver_VS_surfacefedliver	Down	Molecular Functions	GO:0008080	N-acetyltransferase activity	3/220	42/13591	0.0302380028456975	0.4859679028772818	0.4728950820981268	3	0.68	3/0.68	ENSAMXG00000034397/ENSAMXG00000038714/ENSAMXG00000033378	/kat7b/si:ch211-195e19.1
MOLNG-2583	pachonfedliver_VS_surfacefedliver	Down	Molecular Functions	GO:0005484	SNAP receptor activity	2/220	18/13591	0.033659673451903	0.5048951017785451	0.4913131282804088	2	0.29	2/0.29	ENSAMXG00000030897/ENSAMXG00000032256	stx12l/stx1a
MOLNG-2583	pachonfedliver_VS_surfacefedliver	Down	Molecular Functions	GO:0016407	acetyltransferase activity	3/220	45/13591	0.036090860563934	0.5075277266803228	0.4938749340327819	3	0.73	3/0.73	ENSAMXG00000034397/ENSAMXG00000038714/ENSAMXG00000033378	/kat7b/si:ch211-195e19.1
MOLNG-2583	pachonfedliver_VS_surfacefedliver	Down	Molecular Functions	GO:0016410	N-acyltransferase activity	3/220	50/13591	0.047036291633498	0.6221531042409248	0.6054168219046192	3	0.81	3/0.81	ENSAMXG00000034397/ENSAMXG00000038714/ENSAMXG00000033378	/kat7b/si:ch211-195e19.1
MOLNG-2583	pachonfedliver_VS_surfacefedliver	Down	Biological Process	GO:0030488	tRNA methylation	3/154	14/11822	0.0007101215034818502	0.2756290729612157	0.2756290729612157	3	0.18	3/0.18	ENSAMXG00000029671/ENSAMXG00000040010/ENSAMXG00000037663	trmt9b/trmt10b/ftsj1
MOLNG-2583	pachonfedliver_VS_surfacefedliver	Down	Biological Process	GO:0006955	immune response	10/154	229/11822	0.0008240032076568483	0.2756290729612157	0.2756290729612157	10	2.98	10/2.98	ENSAMXG00000043767/ENSAMXG00000037572/ENSAMXG00000015795/ENSAMXG00000032754/ENSAMXG00000033264/ENSAMXG00000040620/ENSAMXG00000005533/ENSAMXG00000035474/ENSAMXG00000038575/ENSAMXG00000017176	////////cfd/
MOLNG-2583	pachonfedliver_VS_surfacefedliver	Down	Biological Process	GO:0006400	tRNA modification	4/154	41/11822	0.0019278351780231	0.3224304335243654	0.3224304335243654	4	0.53	4/0.53	ENSAMXG00000032924/ENSAMXG00000029671/ENSAMXG00000040010/ENSAMXG00000037663	dus4l/trmt9b/trmt10b/ftsj1
MOLNG-2583	pachonfedliver_VS_surfacefedliver	Down	Biological Process	GO:0009615	response to virus	4/154	41/11822	0.0019278351780231	0.3224304335243654	0.3224304335243654	4	0.53	4/0.53	ENSAMXG00000015795/ENSAMXG00000016465/ENSAMXG00000017272/ENSAMXG00000040620	/irf7/rsad2/
MOLNG-2583	pachonfedliver_VS_surfacefedliver	Down	Biological Process	GO:0009605	response to external stimulus	14/154	483/11822	0.0042101131202947	0.486280923466156	0.486280923466156	14	6.29	14/6.29	ENSAMXG00000018516/ENSAMXG00000000399/ENSAMXG00000015795/ENSAMXG00000016465/ENSAMXG00000004323/ENSAMXG00000004525/ENSAMXG00000042375/ENSAMXG00000032754/ENSAMXG00000033264/ENSAMXG00000017272/ENSAMXG00000040620/ENSAMXG00000034177/ENSAMXG00000005533/ENSAMXG00000038575	arl3l2///irf7/rgrb/alpl////rsad2//cyp2r1//cfd
MOLNG-2583	pachonfedliver_VS_surfacefedliver	Down	Biological Process	GO:0043207	response to external biotic stimulus	7/154	164/11822	0.0056283058201262	0.486280923466156	0.486280923466156	7	2.14	7/2.14	ENSAMXG00000000399/ENSAMXG00000015795/ENSAMXG00000016465/ENSAMXG00000042375/ENSAMXG00000017272/ENSAMXG00000040620/ENSAMXG00000038575	//irf7//rsad2//cfd
MOLNG-2583	pachonfedliver_VS_surfacefedliver	Down	Biological Process	GO:0051707	response to other organism	7/154	164/11822	0.0056283058201262	0.486280923466156	0.486280923466156	7	2.14	7/2.14	ENSAMXG00000000399/ENSAMXG00000015795/ENSAMXG00000016465/ENSAMXG00000042375/ENSAMXG00000017272/ENSAMXG00000040620/ENSAMXG00000038575	//irf7//rsad2//cfd
MOLNG-2583	pachonfedliver_VS_surfacefedliver	Down	Biological Process	GO:0009607	response to biotic stimulus	7/154	165/11822	0.0058150185167851	0.486280923466156	0.486280923466156	7	2.15	7/2.15	ENSAMXG00000000399/ENSAMXG00000015795/ENSAMXG00000016465/ENSAMXG00000042375/ENSAMXG00000017272/ENSAMXG00000040620/ENSAMXG00000038575	//irf7//rsad2//cfd
MOLNG-2583	pachonfedliver_VS_surfacefedliver	Down	Biological Process	GO:0044419	interspecies interaction between organisms	7/154	177/11822	0.0084342310428944	0.6085408851228147	0.6085408851228147	7	2.31	7/2.31	ENSAMXG00000000399/ENSAMXG00000015795/ENSAMXG00000016465/ENSAMXG00000042375/ENSAMXG00000017272/ENSAMXG00000040620/ENSAMXG00000038575	//irf7//rsad2//cfd
MOLNG-2583	pachonfedliver_VS_surfacefedliver	Down	Biological Process	GO:0008654	phospholipid biosynthetic process	4/154	63/11822	0.009096276309758	0.6085408851228147	0.6085408851228147	4	0.82	4/0.82	ENSAMXG00000013424/ENSAMXG00000031770/ENSAMXG00000001948/ENSAMXG00000030966	ptdss2/ISYNA1/piga/chpt1
MOLNG-2583	pachonfedliver_VS_surfacefedliver	Down	Biological Process	GO:0008033	tRNA processing	4/154	73/11822	0.0150469151084738	0.8077515824099027	0.8077515824099029	4	0.95	4/0.95	ENSAMXG00000032924/ENSAMXG00000029671/ENSAMXG00000040010/ENSAMXG00000037663	dus4l/trmt9b/trmt10b/ftsj1
MOLNG-2583	pachonfedliver_VS_surfacefedliver	Down	Biological Process	GO:0060326	cell chemotaxis	4/154	75/11822	0.016472677739638	0.8077515824099027	0.8077515824099029	4	0.98	4/0.98	ENSAMXG00000032754/ENSAMXG00000033264/ENSAMXG00000040620/ENSAMXG00000005533	///
MOLNG-2583	pachonfedliver_VS_surfacefedliver	Down	Biological Process	GO:0001510	RNA methylation	3/154	45/11822	0.0206356936380716	0.8077515824099027	0.8077515824099029	3	0.59	3/0.59	ENSAMXG00000029671/ENSAMXG00000040010/ENSAMXG00000037663	trmt9b/trmt10b/ftsj1
MOLNG-2583	pachonfedliver_VS_surfacefedliver	Down	Biological Process	GO:0006289	nucleotide-excision repair	2/154	18/11822	0.022500550374673	0.8077515824099027	0.8077515824099029	2	0.23	2/0.23	ENSAMXG00000017868/ENSAMXG00000018708	gtf2h4/gtf2h1
MOLNG-2583	pachonfedliver_VS_surfacefedliver	Down	Biological Process	GO:0007249	I-kappaB kinase/NF-kappaB signaling	2/154	18/11822	0.022500550374673	0.8077515824099027	0.8077515824099029	2	0.23	2/0.23	ENSAMXG00000025791/ENSAMXG00000013072	si:ch211-15b10.6/ikbkb
MOLNG-2583	pachonfedliver_VS_surfacefedliver	Down	Biological Process	GO:0018298	protein-chromophore linkage	2/154	19/11822	0.0249356479819912	0.8077515824099027	0.8077515824099029	2	0.25	2/0.25	ENSAMXG00000002370/ENSAMXG00000003688	cry-dash/si:ch1073-390k14.1
MOLNG-2583	pachonfedliver_VS_surfacefedliver	Down	Biological Process	GO:0019835	cytolysis	2/154	21/11822	0.0301093495048458	0.8077515824099027	0.8077515824099029	2	0.27	2/0.27	ENSAMXG00000000399/ENSAMXG00000017176	/
MOLNG-2583	pachonfedliver_VS_surfacefedliver	Down	Biological Process	GO:0009451	RNA modification	4/154	92/11822	0.0320130716796522	0.8077515824099027	0.8077515824099029	4	1.2	4/1.2	ENSAMXG00000032924/ENSAMXG00000029671/ENSAMXG00000040010/ENSAMXG00000037663	dus4l/trmt9b/trmt10b/ftsj1
MOLNG-2583	pachonfedliver_VS_surfacefedliver	Down	Biological Process	GO:0002683	negative regulation of immune system process	2/154	23/11822	0.0356677725244034	0.8077515824099027	0.8077515824099029	2	0.3	2/0.3	ENSAMXG00000016465/ENSAMXG00000035474	irf7/
MOLNG-2583	pachonfedliver_VS_surfacefedliver	Down	Biological Process	GO:0061025	membrane fusion	2/154	24/11822	0.0385839965187978	0.8077515824099027	0.8077515824099029	2	0.31	2/0.31	ENSAMXG00000030897/ENSAMXG00000032256	stx12l/stx1a
MOLNG-2583	pachonfedliver_VS_surfacefedliver	Down	Biological Process	GO:0006766	vitamin metabolic process	2/154	26/11822	0.0446764627428098	0.8077515824099027	0.8077515824099029	2	0.34	2/0.34	ENSAMXG00000041876/ENSAMXG00000034177	mmachc/cyp2r1
MOLNG-2583	pachonfedliver_VS_surfacefedliver	Down	Biological Process	GO:1902652	secondary alcohol metabolic process	2/154	26/11822	0.0446764627428098	0.8077515824099027	0.8077515824099029	2	0.34	2/0.34	ENSAMXG00000007438/ENSAMXG00000034177	IDH2/cyp2r1
MOLNG-2583	pachonfedliver_VS_surfacefedliver	Down	Biological Process	GO:0033554	cellular response to stress	8/154	306/11822	0.046854177268668	0.8077515824099027	0.8077515824099029	8	3.99	8/3.99	ENSAMXG00000021444/ENSAMXG00000002370/ENSAMXG00000005262/ENSAMXG00000035815/ENSAMXG00000001835/ENSAMXG00000001641/ENSAMXG00000017868/ENSAMXG00000018708	lgmn/cry-dash//creb3l1/rad52/nrf1/gtf2h4/gtf2h1
MOLNG-2583	pachonfedliver_VS_surfacefedliver	Down	Biological Process	GO:0006956	complement activation	2/154	27/11822	0.0478472721004398	0.8077515824099027	0.8077515824099029	2	0.35	2/0.35	ENSAMXG00000035474/ENSAMXG00000038575	/cfd
MOLNG-2583	pachonfedliver_VS_surfacefedliver	Down	Biological Process	GO:0006629	lipid metabolic process	11/154	479/11822	0.0484735996272333	0.8077515824099027	0.8077515824099029	11	6.24	11/6.24	ENSAMXG00000017880/ENSAMXG00000016625/ENSAMXG00000014409/ENSAMXG00000013424/ENSAMXG00000031770/ENSAMXG00000001948/ENSAMXG00000030966/ENSAMXG00000042976/ENSAMXG00000018194/ENSAMXG00000034177/ENSAMXG00000042228	plcd3a/acot11b/dgkab/ptdss2/ISYNA1/piga/chpt1/erlin1//cyp2r1/alg14
MOLNG-2583	pachonfedliver_VS_surfacefedliver	Down	Cellular Components	GO:0031965	nuclear membrane	3/165	37/10711	0.0190135337668623	0.9602869347298204	0.9602869347298204	3	0.57	3/0.57	ENSAMXG00000009814/ENSAMXG00000039637/ENSAMXG00000042228	sigmar1/tmem18/alg14
MOLNG-2677	pachonstarved_VS_surfacestarved	UP	Molecular Functions	GO:0005217	intracellular ligand-gated ion channel activity	3/130	15/13591	0.00035770022475655253	0.0761901478731457	0.0670217263228066	3	0.14	3/0.14	ENSAMXG00000001795/ENSAMXG00000000107/ENSAMXG00000008578	itpr1a/cngb3.2/ryr1a
MOLNG-2677	pachonstarved_VS_surfacestarved	UP	Molecular Functions	GO:0015293	symporter activity	4/130	66/13591	0.0036441988984901	0.1646944301203422	0.14487575271273	4	0.63	4/0.63	ENSAMXG00000002038/ENSAMXG00000016875/ENSAMXG00000013233/ENSAMXG00000010974	si:ch211-117c9.5/slc28a1/slc12a2/mfsd2ab
MOLNG-2677	pachonstarved_VS_surfacestarved	UP	Molecular Functions	GO:0015278	calcium-release channel activity	2/130	11/13591	0.00471927903053	0.1646944301203422	0.14487575271273	2	0.11	2/0.11	ENSAMXG00000001795/ENSAMXG00000008578	itpr1a/ryr1a
MOLNG-2677	pachonstarved_VS_surfacestarved	UP	Molecular Functions	GO:0099604	ligand-gated calcium channel activity	2/130	11/13591	0.00471927903053	0.1646944301203422	0.14487575271273	2	0.11	2/0.11	ENSAMXG00000001795/ENSAMXG00000008578	itpr1a/ryr1a
MOLNG-2677	pachonstarved_VS_surfacestarved	UP	Molecular Functions	GO:0030170	pyridoxal phosphate binding	3/130	38/13591	0.0056501862283542	0.1646944301203422	0.14487575271273	3	0.36	3/0.36	ENSAMXG00000017574/ENSAMXG00000012538/ENSAMXG00000020893	accs/kyat3/gcat
MOLNG-2677	pachonstarved_VS_surfacestarved	UP	Molecular Functions	GO:0070279	vitamin B6 binding	3/130	38/13591	0.0056501862283542	0.1646944301203422	0.14487575271273	3	0.36	3/0.36	ENSAMXG00000017574/ENSAMXG00000012538/ENSAMXG00000020893	accs/kyat3/gcat
MOLNG-2677	pachonstarved_VS_surfacestarved	UP	Molecular Functions	GO:0015318	inorganic molecular entity transmembrane transporter activity	11/130	482/13591	0.0065192376811745	0.1646944301203422	0.14487575271273	11	4.61	11/4.61	ENSAMXG00000014880/ENSAMXG00000001795/ENSAMXG00000000107/ENSAMXG00000014290/ENSAMXG00000007933/ENSAMXG00000012634/ENSAMXG00000016875/ENSAMXG00000013233/ENSAMXG00000008578/ENSAMXG00000001272/ENSAMXG00000018236	kcnk10b/itpr1a/cngb3.2/atp1a3a/gabrr3b/slc4a2a/slc28a1/slc12a2/ryr1a/PIEZO2/hcn2b
MOLNG-2677	pachonstarved_VS_surfacestarved	UP	Molecular Functions	GO:0015291	secondary active transmembrane transporter activity	5/130	127/13591	0.0074427609336406	0.1646944301203422	0.14487575271273	5	1.21	5/1.21	ENSAMXG00000012634/ENSAMXG00000002038/ENSAMXG00000016875/ENSAMXG00000013233/ENSAMXG00000010974	slc4a2a/si:ch211-117c9.5/slc28a1/slc12a2/mfsd2ab
MOLNG-2677	pachonstarved_VS_surfacestarved	UP	Molecular Functions	GO:0005089	Rho guanyl-nucleotide exchange factor activity	2/130	14/13591	0.0076631607755821	0.1646944301203422	0.14487575271273	2	0.13	2/0.13	ENSAMXG00000007413/ENSAMXG00000020463	arhgef12b/trioa
MOLNG-2677	pachonstarved_VS_surfacestarved	UP	Molecular Functions	GO:0003678	DNA helicase activity	3/130	45/13591	0.0090546612235106	0.1646944301203422	0.14487575271273	3	0.43	3/0.43	ENSAMXG00000011367/ENSAMXG00000009293/ENSAMXG00000018571	helb/recql5/rtel1
MOLNG-2677	pachonstarved_VS_surfacestarved	UP	Molecular Functions	GO:0015276	ligand-gated ion channel activity	4/130	86/13591	0.0092785594433995	0.1646944301203422	0.14487575271273	4	0.82	4/0.82	ENSAMXG00000001795/ENSAMXG00000000107/ENSAMXG00000007933/ENSAMXG00000008578	itpr1a/cngb3.2/gabrr3b/ryr1a
MOLNG-2677	pachonstarved_VS_surfacestarved	UP	Molecular Functions	GO:0022834	ligand-gated channel activity	4/130	86/13591	0.0092785594433995	0.1646944301203422	0.14487575271273	4	0.82	4/0.82	ENSAMXG00000001795/ENSAMXG00000000107/ENSAMXG00000007933/ENSAMXG00000008578	itpr1a/cngb3.2/gabrr3b/ryr1a
MOLNG-2677	pachonstarved_VS_surfacestarved	UP	Molecular Functions	GO:0099094	ligand-gated cation channel activity	3/130	50/13591	0.012082617275154	0.1743488393754874	0.1533683884795491	3	0.48	3/0.48	ENSAMXG00000001795/ENSAMXG00000000107/ENSAMXG00000008578	itpr1a/cngb3.2/ryr1a
MOLNG-2677	pachonstarved_VS_surfacestarved	UP	Molecular Functions	GO:0008483	transaminase activity	2/130	18/13591	0.0125668036510409	0.1743488393754874	0.1533683884795491	2	0.17	2/0.17	ENSAMXG00000020455/ENSAMXG00000012538	psat1/kyat3
MOLNG-2677	pachonstarved_VS_surfacestarved	UP	Molecular Functions	GO:0022853	active ion transmembrane transporter activity	4/130	95/13591	0.013029144291106	0.1743488393754874	0.1533683884795491	4	0.91	4/0.91	ENSAMXG00000014290/ENSAMXG00000012634/ENSAMXG00000016875/ENSAMXG00000013233	atp1a3a/slc4a2a/slc28a1/slc12a2
MOLNG-2677	pachonstarved_VS_surfacestarved	UP	Molecular Functions	GO:0015294	solute:cation symporter activity	2/130	19/13591	0.0139581023210524	0.1743488393754874	0.1533683884795491	2	0.18	2/0.18	ENSAMXG00000016875/ENSAMXG00000013233	slc28a1/slc12a2
MOLNG-2677	pachonstarved_VS_surfacestarved	UP	Molecular Functions	GO:0016769	transferase activity, transferring nitrogenous groups	2/130	19/13591	0.0139581023210524	0.1743488393754874	0.1533683884795491	2	0.18	2/0.18	ENSAMXG00000020455/ENSAMXG00000012538	psat1/kyat3
MOLNG-2677	pachonstarved_VS_surfacestarved	UP	Molecular Functions	GO:0005216	ion channel activity	7/130	272/13591	0.0156460387154264	0.1743488393754874	0.1533683884795491	7	2.6	7/2.6	ENSAMXG00000014880/ENSAMXG00000001795/ENSAMXG00000000107/ENSAMXG00000007933/ENSAMXG00000008578/ENSAMXG00000001272/ENSAMXG00000018236	kcnk10b/itpr1a/cngb3.2/gabrr3b/ryr1a/PIEZO2/hcn2b
MOLNG-2677	pachonstarved_VS_surfacestarved	UP	Molecular Functions	GO:0022836	gated channel activity	6/130	211/13591	0.0158636243049296	0.1743488393754874	0.1533683884795491	6	2.02	6/2.02	ENSAMXG00000001795/ENSAMXG00000000107/ENSAMXG00000007933/ENSAMXG00000008578/ENSAMXG00000001272/ENSAMXG00000018236	itpr1a/cngb3.2/gabrr3b/ryr1a/PIEZO2/hcn2b
MOLNG-2677	pachonstarved_VS_surfacestarved	UP	Molecular Functions	GO:0008094	DNA-dependent ATPase activity	3/130	56/13591	0.0163969135981402	0.1743488393754874	0.1533683884795491	3	0.54	3/0.54	ENSAMXG00000011367/ENSAMXG00000009293/ENSAMXG00000018571	helb/recql5/rtel1
MOLNG-2677	pachonstarved_VS_surfacestarved	UP	Molecular Functions	GO:0004620	phospholipase activity	3/130	57/13591	0.0171893221919494	0.1743488393754874	0.1533683884795491	3	0.55	3/0.55	ENSAMXG00000006275/ENSAMXG00000002297/ENSAMXG00000017456	plcd3b/si:ch211-168k14.2/PLAAT4
MOLNG-2677	pachonstarved_VS_surfacestarved	UP	Molecular Functions	GO:0022890	inorganic cation transmembrane transporter activity	8/130	346/13591	0.0180706213848343	0.1749564706804414	0.1539028998325603	8	3.31	8/3.31	ENSAMXG00000014880/ENSAMXG00000001795/ENSAMXG00000000107/ENSAMXG00000014290/ENSAMXG00000016875/ENSAMXG00000013233/ENSAMXG00000008578/ENSAMXG00000018236	kcnk10b/itpr1a/cngb3.2/atp1a3a/slc28a1/slc12a2/ryr1a/hcn2b
MOLNG-2677	pachonstarved_VS_surfacestarved	UP	Molecular Functions	GO:0022804	active transmembrane transporter activity	6/130	221/13591	0.019468396628522	0.1787834607861281	0.1572693650601967	6	2.11	6/2.11	ENSAMXG00000014290/ENSAMXG00000012634/ENSAMXG00000002038/ENSAMXG00000016875/ENSAMXG00000013233/ENSAMXG00000010974	atp1a3a/slc4a2a/si:ch211-117c9.5/slc28a1/slc12a2/mfsd2ab
MOLNG-2677	pachonstarved_VS_surfacestarved	UP	Molecular Functions	GO:0005088	Ras guanyl-nucleotide exchange factor activity	2/130	23/13591	0.0201446152998454	0.1787834607861281	0.1572693650601967	2	0.22	2/0.22	ENSAMXG00000007413/ENSAMXG00000020463	arhgef12b/trioa
MOLNG-2677	pachonstarved_VS_surfacestarved	UP	Molecular Functions	GO:0008324	cation transmembrane transporter activity	8/130	361/13591	0.022641544529542	0.1929059593916983	0.1696924179477257	8	3.45	8/3.45	ENSAMXG00000014880/ENSAMXG00000001795/ENSAMXG00000000107/ENSAMXG00000014290/ENSAMXG00000016875/ENSAMXG00000013233/ENSAMXG00000008578/ENSAMXG00000018236	kcnk10b/itpr1a/cngb3.2/atp1a3a/slc28a1/slc12a2/ryr1a/hcn2b
MOLNG-2677	pachonstarved_VS_surfacestarved	UP	Molecular Functions	GO:0046873	metal ion transmembrane transporter activity	6/130	232/13591	0.0240395448174542	0.1947130552619172	0.1712820550364283	6	2.22	6/2.22	ENSAMXG00000014880/ENSAMXG00000001795/ENSAMXG00000014290/ENSAMXG00000016875/ENSAMXG00000008578/ENSAMXG00000018236	kcnk10b/itpr1a/atp1a3a/slc28a1/ryr1a/hcn2b
MOLNG-2677	pachonstarved_VS_surfacestarved	UP	Molecular Functions	GO:0015267	channel activity	7/130	301/13591	0.0255960823818482	0.1947130552619172	0.1712820550364283	7	2.88	7/2.88	ENSAMXG00000014880/ENSAMXG00000001795/ENSAMXG00000000107/ENSAMXG00000007933/ENSAMXG00000008578/ENSAMXG00000001272/ENSAMXG00000018236	kcnk10b/itpr1a/cngb3.2/gabrr3b/ryr1a/PIEZO2/hcn2b
MOLNG-2677	pachonstarved_VS_surfacestarved	UP	Molecular Functions	GO:0022803	passive transmembrane transporter activity	7/130	301/13591	0.0255960823818482	0.1947130552619172	0.1712820550364283	7	2.88	7/2.88	ENSAMXG00000014880/ENSAMXG00000001795/ENSAMXG00000000107/ENSAMXG00000007933/ENSAMXG00000008578/ENSAMXG00000001272/ENSAMXG00000018236	kcnk10b/itpr1a/cngb3.2/gabrr3b/ryr1a/PIEZO2/hcn2b
MOLNG-2677	pachonstarved_VS_surfacestarved	UP	Molecular Functions	GO:0004725	protein tyrosine phosphatase activity	4/130	118/13591	0.026593636360028	0.1953256739546889	0.1718209536147004	4	1.13	4/1.13	ENSAMXG00000000934/ENSAMXG00000016917/ENSAMXG00000004431/ENSAMXG00000000789	ptprz1a/ca16b/ptpdc1a/ptpro
MOLNG-2677	pachonstarved_VS_surfacestarved	UP	Molecular Functions	GO:0004601	peroxidase activity	2/130	29/13591	0.0311486528382639	0.2211554351516742	0.1945424633407364	2	0.28	2/0.28	ENSAMXG00000015995/ENSAMXG00000009958	gpx4a/
MOLNG-2677	pachonstarved_VS_surfacestarved	UP	Molecular Functions	GO:0016684	oxidoreductase activity, acting on peroxide as acceptor	2/130	30/13591	0.0331682291989458	0.2256479320455142	0.1984943508974624	2	0.29	2/0.29	ENSAMXG00000015995/ENSAMXG00000009958	gpx4a/
MOLNG-2677	pachonstarved_VS_surfacestarved	UP	Molecular Functions	GO:0016298	lipase activity	3/130	74/13591	0.0339001588049598	0.2256479320455142	0.1984943508974624	3	0.71	3/0.71	ENSAMXG00000006275/ENSAMXG00000002297/ENSAMXG00000017456	plcd3b/si:ch211-168k14.2/PLAAT4
MOLNG-2677	pachonstarved_VS_surfacestarved	UP	Molecular Functions	GO:0005261	cation channel activity	5/130	195/13591	0.0393164084868133	0.2537695456876133	0.2232319205949848	5	1.87	5/1.87	ENSAMXG00000014880/ENSAMXG00000001795/ENSAMXG00000000107/ENSAMXG00000008578/ENSAMXG00000018236	kcnk10b/itpr1a/cngb3.2/ryr1a/hcn2b
MOLNG-2677	pachonstarved_VS_surfacestarved	UP	Molecular Functions	GO:0019842	vitamin binding	3/130	80/13591	0.0412473162507186	0.2584023047471493	0.2273071917222267	3	0.77	3/0.77	ENSAMXG00000017574/ENSAMXG00000012538/ENSAMXG00000020893	accs/kyat3/gcat
MOLNG-2677	pachonstarved_VS_surfacestarved	UP	Molecular Functions	GO:0015103	inorganic anion transmembrane transporter activity	3/130	85/13591	0.0479319507679895	0.2917001575309075	0.256598112382019	3	0.81	3/0.81	ENSAMXG00000007933/ENSAMXG00000012634/ENSAMXG00000013233	gabrr3b/slc4a2a/slc12a2
MOLNG-2677	pachonstarved_VS_surfacestarved	UP	Cellular Components	GO:0016323	basolateral plasma membrane	2/90	11/10711	0.0036555921176559	0.303273675776026	0.3008180184822931	2	0.09	2/0.09	ENSAMXG00000012634/ENSAMXG00000013233	slc4a2a/slc12a2
MOLNG-2677	pachonstarved_VS_surfacestarved	UP	Cellular Components	GO:0043025	neuronal cell body	2/90	15/10711	0.0068281665043513	0.303273675776026	0.3008180184822931	2	0.13	2/0.13	ENSAMXG00000004485/ENSAMXG00000011638	galn/shtn1
MOLNG-2677	pachonstarved_VS_surfacestarved	UP	Cellular Components	GO:0044297	cell body	2/90	17/10711	0.0087482791089238	0.303273675776026	0.3008180184822931	2	0.14	2/0.14	ENSAMXG00000004485/ENSAMXG00000011638	galn/shtn1
MOLNG-2677	pachonstarved_VS_surfacestarved	UP	Cellular Components	GO:0098590	plasma membrane region	5/90	163/10711	0.011949239525516	0.3106802276634183	0.3081645982896255	5	1.37	5/1.37	ENSAMXG00000013138/ENSAMXG00000007933/ENSAMXG00000012634/ENSAMXG00000013233/ENSAMXG00000003683	/gabrr3b/slc4a2a/slc12a2/bbs2
MOLNG-2677	pachonstarved_VS_surfacestarved	UP	Cellular Components	GO:0005581	collagen trimer	2/90	24/10711	0.01709156297369	0.3555045098527531	0.3526259308256054	2	0.2	2/0.2	ENSAMXG00000002013/ENSAMXG00000024639	/col28a1b
MOLNG-2677	pachonstarved_VS_surfacestarved	UP	Cellular Components	GO:0036477	somatodendritic compartment	2/90	38/10711	0.0403674584540739	0.5917995426538646	0.5870076435230642	2	0.32	2/0.32	ENSAMXG00000004485/ENSAMXG00000011638	galn/shtn1
MOLNG-2677	pachonstarved_VS_surfacestarved	UP	Biological Process	GO:0007155	cell adhesion	12/117	356/11822	0.00020650394949821264	0.0655650039656825	0.064777028368913	12	3.52	12/3.52	ENSAMXG00000005975/ENSAMXG00000005018/ENSAMXG00000002013/ENSAMXG00000018249/ENSAMXG00000010785/ENSAMXG00000024639/ENSAMXG00000014150/ENSAMXG00000007234/ENSAMXG00000015542/ENSAMXG00000003450/ENSAMXG00000003870/ENSAMXG00000001023	TENM2/svep1//ctnnd2b/PKP4/col28a1b/epdr1/pkp2/si:dkey-22o22.2/nlgn2a/lyve1b/nptna
MOLNG-2677	pachonstarved_VS_surfacestarved	UP	Biological Process	GO:0022610	biological adhesion	12/117	356/11822	0.00020650394949821264	0.0655650039656825	0.064777028368913	12	3.52	12/3.52	ENSAMXG00000005975/ENSAMXG00000005018/ENSAMXG00000002013/ENSAMXG00000018249/ENSAMXG00000010785/ENSAMXG00000024639/ENSAMXG00000014150/ENSAMXG00000007234/ENSAMXG00000015542/ENSAMXG00000003450/ENSAMXG00000003870/ENSAMXG00000001023	TENM2/svep1//ctnnd2b/PKP4/col28a1b/epdr1/pkp2/si:dkey-22o22.2/nlgn2a/lyve1b/nptna
MOLNG-2677	pachonstarved_VS_surfacestarved	UP	Biological Process	GO:1901605	alpha-amino acid metabolic process	5/117	83/11822	0.001368562239365	0.2896790073322725	0.2861975770742385	5	0.82	5/0.82	ENSAMXG00000020455/ENSAMXG00000017914/ENSAMXG00000009648/ENSAMXG00000012538/ENSAMXG00000020893	psat1/hal/ctps1a/kyat3/gcat
MOLNG-2677	pachonstarved_VS_surfacestarved	UP	Biological Process	GO:0006220	pyrimidine nucleotide metabolic process	3/117	27/11822	0.0023238095906118	0.2951238180077051	0.2915769507378238	3	0.27	3/0.27	ENSAMXG00000013752/ENSAMXG00000009648/ENSAMXG00000017490	gpam/ctps1a/uckl1b
MOLNG-2677	pachonstarved_VS_surfacestarved	UP	Biological Process	GO:0006221	pyrimidine nucleotide biosynthetic process	3/117	27/11822	0.0023238095906118	0.2951238180077051	0.2915769507378238	3	0.27	3/0.27	ENSAMXG00000013752/ENSAMXG00000009648/ENSAMXG00000017490	gpam/ctps1a/uckl1b
MOLNG-2677	pachonstarved_VS_surfacestarved	UP	Biological Process	GO:0072528	pyrimidine-containing compound biosynthetic process	3/117	29/11822	0.0028615640871863	0.3028488658938914	0.2992091571865052	3	0.29	3/0.29	ENSAMXG00000013752/ENSAMXG00000009648/ENSAMXG00000017490	gpam/ctps1a/uckl1b
MOLNG-2677	pachonstarved_VS_surfacestarved	UP	Biological Process	GO:0006520	cellular amino acid metabolic process	6/117	154/11822	0.0042320302688729	0.3839056029620499	0.3792917353756847	6	1.52	6/1.52	ENSAMXG00000020455/ENSAMXG00000017914/ENSAMXG00000009648/ENSAMXG00000015502/ENSAMXG00000012538/ENSAMXG00000020893	psat1/hal/ctps1a/hpdb/kyat3/gcat
MOLNG-2677	pachonstarved_VS_surfacestarved	UP	Biological Process	GO:0072527	pyrimidine-containing compound metabolic process	3/117	36/11822	0.0053178768427921	0.3965617149394345	0.3917957432306722	3	0.36	3/0.36	ENSAMXG00000013752/ENSAMXG00000009648/ENSAMXG00000017490	gpam/ctps1a/uckl1b
MOLNG-2677	pachonstarved_VS_surfacestarved	UP	Biological Process	GO:0006241	CTP biosynthetic process	2/117	14/11822	0.0081765235486618	0.3965617149394345	0.3917957432306722	2	0.14	2/0.14	ENSAMXG00000009648/ENSAMXG00000017490	ctps1a/uckl1b
MOLNG-2677	pachonstarved_VS_surfacestarved	UP	Biological Process	GO:0009148	pyrimidine nucleoside triphosphate biosynthetic process	2/117	14/11822	0.0081765235486618	0.3965617149394345	0.3917957432306722	2	0.14	2/0.14	ENSAMXG00000009648/ENSAMXG00000017490	ctps1a/uckl1b
MOLNG-2677	pachonstarved_VS_surfacestarved	UP	Biological Process	GO:0009208	pyrimidine ribonucleoside triphosphate metabolic process	2/117	14/11822	0.0081765235486618	0.3965617149394345	0.3917957432306722	2	0.14	2/0.14	ENSAMXG00000009648/ENSAMXG00000017490	ctps1a/uckl1b
MOLNG-2677	pachonstarved_VS_surfacestarved	UP	Biological Process	GO:0009209	pyrimidine ribonucleoside triphosphate biosynthetic process	2/117	14/11822	0.0081765235486618	0.3965617149394345	0.3917957432306722	2	0.14	2/0.14	ENSAMXG00000009648/ENSAMXG00000017490	ctps1a/uckl1b
MOLNG-2677	pachonstarved_VS_surfacestarved	UP	Biological Process	GO:0046036	CTP metabolic process	2/117	14/11822	0.0081765235486618	0.3965617149394345	0.3917957432306722	2	0.14	2/0.14	ENSAMXG00000009648/ENSAMXG00000017490	ctps1a/uckl1b
MOLNG-2677	pachonstarved_VS_surfacestarved	UP	Biological Process	GO:0046474	glycerophospholipid biosynthetic process	3/117	43/11822	0.0087430929277985	0.3965617149394345	0.3917957432306722	3	0.43	3/0.43	ENSAMXG00000013752/ENSAMXG00000002297/ENSAMXG00000015923	gpam/si:ch211-168k14.2/pgs1
MOLNG-2677	pachonstarved_VS_surfacestarved	UP	Biological Process	GO:0009147	pyrimidine nucleoside triphosphate metabolic process	2/117	15/11822	0.0093738147103341	0.3968248227374794	0.3920556889374849	2	0.15	2/0.15	ENSAMXG00000009648/ENSAMXG00000017490	ctps1a/uckl1b
MOLNG-2677	pachonstarved_VS_surfacestarved	UP	Biological Process	GO:0045017	glycerolipid biosynthetic process	3/117	47/11822	0.0111647460634889	0.4431008593947173	0.43777556933154	3	0.47	3/0.47	ENSAMXG00000013752/ENSAMXG00000002297/ENSAMXG00000015923	gpam/si:ch211-168k14.2/pgs1
MOLNG-2677	pachonstarved_VS_surfacestarved	UP	Biological Process	GO:0016236	macroautophagy	2/117	17/11822	0.0119859384683276	0.4477100545522368	0.4423293701005109	2	0.17	2/0.17	ENSAMXG00000021375/ENSAMXG00000014097	atg13/atg7
MOLNG-2677	pachonstarved_VS_surfacestarved	UP	Biological Process	GO:0009218	pyrimidine ribonucleotide metabolic process	2/117	19/11822	0.0148779829465049	0.4690953968455092	0.4634576983338973	2	0.19	2/0.19	ENSAMXG00000009648/ENSAMXG00000017490	ctps1a/uckl1b
MOLNG-2677	pachonstarved_VS_surfacestarved	UP	Biological Process	GO:0009220	pyrimidine ribonucleotide biosynthetic process	2/117	19/11822	0.0148779829465049	0.4690953968455092	0.4634576983338973	2	0.19	2/0.19	ENSAMXG00000009648/ENSAMXG00000017490	ctps1a/uckl1b
MOLNG-2677	pachonstarved_VS_surfacestarved	UP	Biological Process	GO:0018298	protein-chromophore linkage	2/117	19/11822	0.0148779829465049	0.4690953968455092	0.4634576983338973	2	0.19	2/0.19	ENSAMXG00000005406/ENSAMXG00000020084	cry1a/cry1b
MOLNG-2677	pachonstarved_VS_surfacestarved	UP	Biological Process	GO:0000723	telomere maintenance	2/117	21/11822	0.0180381012781788	0.4690953968455092	0.4634576983338973	2	0.21	2/0.21	ENSAMXG00000012564/ENSAMXG00000018571	stn1/rtel1
MOLNG-2677	pachonstarved_VS_surfacestarved	UP	Biological Process	GO:0032200	telomere organization	2/117	21/11822	0.0180381012781788	0.4690953968455092	0.4634576983338973	2	0.21	2/0.21	ENSAMXG00000012564/ENSAMXG00000018571	stn1/rtel1
MOLNG-2677	pachonstarved_VS_surfacestarved	UP	Biological Process	GO:0098609	cell-cell adhesion	5/117	155/11822	0.0188248458229525	0.4690953968455092	0.4634576983338973	5	1.53	5/1.53	ENSAMXG00000005018/ENSAMXG00000018249/ENSAMXG00000010785/ENSAMXG00000007234/ENSAMXG00000015542	svep1/ctnnd2b/PKP4/pkp2/si:dkey-22o22.2
MOLNG-2677	pachonstarved_VS_surfacestarved	UP	Biological Process	GO:0009072	aromatic amino acid family metabolic process	2/117	22/11822	0.0197150822676905	0.4690953968455092	0.4634576983338973	2	0.22	2/0.22	ENSAMXG00000017914/ENSAMXG00000015502	hal/hpdb
MOLNG-2677	pachonstarved_VS_surfacestarved	UP	Biological Process	GO:0051017	actin filament bundle assembly	2/117	22/11822	0.0197150822676905	0.4690953968455092	0.4634576983338973	2	0.22	2/0.22	ENSAMXG00000019095/ENSAMXG00000005952	pls1/fhod1
MOLNG-2677	pachonstarved_VS_surfacestarved	UP	Biological Process	GO:0007033	vacuole organization	2/117	23/11822	0.0214547977760592	0.4690953968455092	0.4634576983338973	2	0.23	2/0.23	ENSAMXG00000021375/ENSAMXG00000014097	atg13/atg7
MOLNG-2677	pachonstarved_VS_surfacestarved	UP	Biological Process	GO:1901264	carbohydrate derivative transport	2/117	23/11822	0.0214547977760592	0.4690953968455092	0.4634576983338973	2	0.23	2/0.23	ENSAMXG00000016875/ENSAMXG00000010974	slc28a1/mfsd2ab
MOLNG-2677	pachonstarved_VS_surfacestarved	UP	Biological Process	GO:0006650	glycerophospholipid metabolic process	4/117	108/11822	0.0222263618735852	0.4690953968455092	0.4634576983338973	4	1.07	4/1.07	ENSAMXG00000013752/ENSAMXG00000002297/ENSAMXG00000015923/ENSAMXG00000016009	gpam/si:ch211-168k14.2/pgs1/pip5k1ca
MOLNG-2677	pachonstarved_VS_surfacestarved	UP	Biological Process	GO:0006644	phospholipid metabolic process	5/117	163/11822	0.0228388708321404	0.4690953968455092	0.4634576983338973	5	1.61	5/1.61	ENSAMXG00000013752/ENSAMXG00000002297/ENSAMXG00000015923/ENSAMXG00000017456/ENSAMXG00000016009	gpam/si:ch211-168k14.2/pgs1/PLAAT4/pip5k1ca
MOLNG-2677	pachonstarved_VS_surfacestarved	UP	Biological Process	GO:0034220	ion transmembrane transport	10/117	491/11822	0.0236135433823828	0.4690953968455092	0.4634576983338973	10	4.86	10/4.86	ENSAMXG00000014880/ENSAMXG00000001795/ENSAMXG00000000107/ENSAMXG00000014290/ENSAMXG00000007933/ENSAMXG00000012634/ENSAMXG00000017827/ENSAMXG00000013233/ENSAMXG00000008578/ENSAMXG00000018236	kcnk10b/itpr1a/cngb3.2/atp1a3a/gabrr3b/slc4a2a/nudt9/slc12a2/ryr1a/hcn2b
MOLNG-2677	pachonstarved_VS_surfacestarved	UP	Biological Process	GO:0008654	phospholipid biosynthetic process	3/117	63/11822	0.0244087579862189	0.4690953968455092	0.4634576983338973	3	0.62	3/0.62	ENSAMXG00000013752/ENSAMXG00000002297/ENSAMXG00000015923	gpam/si:ch211-168k14.2/pgs1
MOLNG-2677	pachonstarved_VS_surfacestarved	UP	Biological Process	GO:0009636	response to toxic substance	3/117	63/11822	0.0244087579862189	0.4690953968455092	0.4634576983338973	3	0.62	3/0.62	ENSAMXG00000015995/ENSAMXG00000009958/ENSAMXG00000005406	gpx4a//cry1a
MOLNG-2677	pachonstarved_VS_surfacestarved	UP	Biological Process	GO:0035335	peptidyl-tyrosine dephosphorylation	4/117	112/11822	0.0250028688556902	0.4690953968455092	0.4634576983338973	4	1.11	4/1.11	ENSAMXG00000000934/ENSAMXG00000016917/ENSAMXG00000004431/ENSAMXG00000000789	ptprz1a/ca16b/ptpdc1a/ptpro
MOLNG-2677	pachonstarved_VS_surfacestarved	UP	Biological Process	GO:0061572	actin filament bundle organization	2/117	25/11822	0.0251169188862162	0.4690953968455092	0.4634576983338973	2	0.25	2/0.25	ENSAMXG00000019095/ENSAMXG00000005952	pls1/fhod1
MOLNG-2677	pachonstarved_VS_surfacestarved	UP	Biological Process	GO:0002040	sprouting angiogenesis	3/117	66/11822	0.0275372192174032	0.4996038343728881	0.4935994783029281	3	0.65	3/0.65	ENSAMXG00000010157/ENSAMXG00000010835/ENSAMXG00000017515	arhgap18/rbpjb/hspa12b
MOLNG-2677	pachonstarved_VS_surfacestarved	UP	Biological Process	GO:0046486	glycerolipid metabolic process	4/117	120/11822	0.031160599323511	0.5496383491785974	0.5430326665734673	4	1.19	4/1.19	ENSAMXG00000013752/ENSAMXG00000002297/ENSAMXG00000015923/ENSAMXG00000016009	gpam/si:ch211-168k14.2/pgs1/pip5k1ca
MOLNG-2677	pachonstarved_VS_surfacestarved	UP	Biological Process	GO:0070925	organelle assembly	6/117	250/11822	0.0377704993452234	0.6235711523797283	0.6160769280038426	6	2.47	6/2.47	ENSAMXG00000017213/ENSAMXG00000003247/ENSAMXG00000021375/ENSAMXG00000003683/ENSAMXG00000012576/ENSAMXG00000014097	IFT122/sav1/atg13/bbs2/cep120/atg7
MOLNG-2677	pachonstarved_VS_surfacestarved	UP	Biological Process	GO:1901606	alpha-amino acid catabolic process	2/117	32/11822	0.0397137512363198	0.6235711523797283	0.6160769280038426	2	0.32	2/0.32	ENSAMXG00000017914/ENSAMXG00000020893	hal/gcat
MOLNG-2677	pachonstarved_VS_surfacestarved	UP	Biological Process	GO:0009064	glutamine family amino acid metabolic process	2/117	36/11822	0.0491780496867911	0.6235711523797283	0.6160769280038426	2	0.36	2/0.36	ENSAMXG00000017914/ENSAMXG00000009648	hal/ctps1a
MOLNG-2677	pachonstarved_VS_surfacestarved	Down	Molecular Functions	GO:0008234	cysteine-type peptidase activity	5/89	178/13591	0.0062345192812304	0.3947528615380183	0.3947528615380183	5	1.17	5/1.17	ENSAMXG00000021444/ENSAMXG00000014689/ENSAMXG00000010263/ENSAMXG00000011487/ENSAMXG00000008009	lgmn/TINAGL1/CASP6/otud6b/zranb1b
MOLNG-2677	pachonstarved_VS_surfacestarved	Down	Molecular Functions	GO:0051539	4 iron, 4 sulfur cluster binding	2/89	29/13591	0.0153493446162248	0.3947528615380183	0.3947528615380183	2	0.19	2/0.19	ENSAMXG00000018092/ENSAMXG00000005262	mocs1/
MOLNG-2677	pachonstarved_VS_surfacestarved	Down	Molecular Functions	GO:0003729	mRNA binding	2/89	42/13591	0.0308183647130299	0.3947528615380183	0.3947528615380183	2	0.28	2/0.28	ENSAMXG00000003585/ENSAMXG00000019345	fxr2/eif4g1a
MOLNG-2677	pachonstarved_VS_surfacestarved	Down	Molecular Functions	GO:0016798	hydrolase activity, acting on glycosyl bonds	3/89	107/13591	0.0330817676372441	0.3947528615380183	0.3947528615380183	3	0.7	3/0.7	ENSAMXG00000015721/ENSAMXG00000017869/ENSAMXG00000005262	man1b1b/hexa/
MOLNG-2677	pachonstarved_VS_surfacestarved	Down	Molecular Functions	GO:0016765	transferase activity, transferring alkyl or aryl (other than methyl) groups	2/89	46/13591	0.0364307892867699	0.3947528615380183	0.3947528615380183	2	0.3	2/0.3	ENSAMXG00000021391/ENSAMXG00000014946	cox10/gstt1a
MOLNG-2677	pachonstarved_VS_surfacestarved	Down	Cellular Components	GO:0000323	lytic vacuole	4/56	92/10711	0.0013310727948154	0.047204976944781	0.0434782682386141	4	0.48	4/0.48	ENSAMXG00000014236/ENSAMXG00000017869/ENSAMXG00000013665/ENSAMXG00000008120	pip4p1a/hexa/clcn3/tmem9b
MOLNG-2677	pachonstarved_VS_surfacestarved	Down	Cellular Components	GO:0005764	lysosome	4/56	92/10711	0.0013310727948154	0.047204976944781	0.0434782682386141	4	0.48	4/0.48	ENSAMXG00000014236/ENSAMXG00000017869/ENSAMXG00000013665/ENSAMXG00000008120	pip4p1a/hexa/clcn3/tmem9b
MOLNG-2677	pachonstarved_VS_surfacestarved	Down	Cellular Components	GO:0005765	lysosomal membrane	3/56	51/10711	0.002360248847239	0.047204976944781	0.0434782682386141	3	0.27	3/0.27	ENSAMXG00000014236/ENSAMXG00000013665/ENSAMXG00000008120	pip4p1a/clcn3/tmem9b
MOLNG-2677	pachonstarved_VS_surfacestarved	Down	Cellular Components	GO:0098852	lytic vacuole membrane	3/56	51/10711	0.002360248847239	0.047204976944781	0.0434782682386141	3	0.27	3/0.27	ENSAMXG00000014236/ENSAMXG00000013665/ENSAMXG00000008120	pip4p1a/clcn3/tmem9b
MOLNG-2677	pachonstarved_VS_surfacestarved	Down	Cellular Components	GO:0005773	vacuole	4/56	115/10711	0.0030138247143866	0.0482211954301866	0.044414258948856	4	0.6	4/0.6	ENSAMXG00000014236/ENSAMXG00000017869/ENSAMXG00000013665/ENSAMXG00000008120	pip4p1a/hexa/clcn3/tmem9b
MOLNG-2677	pachonstarved_VS_surfacestarved	Down	Cellular Components	GO:0005774	vacuolar membrane	3/56	61/10711	0.003931486852663	0.0524198247021746	0.048281417488845	3	0.32	3/0.32	ENSAMXG00000014236/ENSAMXG00000013665/ENSAMXG00000008120	pip4p1a/clcn3/tmem9b
MOLNG-2677	pachonstarved_VS_surfacestarved	Down	Cellular Components	GO:0031902	late endosome membrane	2/56	31/10711	0.0113288465712056	0.1294725322423504	0.119251016539007	2	0.16	2/0.16	ENSAMXG00000014236/ENSAMXG00000013665	pip4p1a/clcn3
MOLNG-2677	pachonstarved_VS_surfacestarved	Down	Cellular Components	GO:0098805	whole membrane	5/56	296/10711	0.0188690072299358	0.1886900722993587	0.1737934876441462	5	1.55	5/1.55	ENSAMXG00000009814/ENSAMXG00000014236/ENSAMXG00000010351/ENSAMXG00000013665/ENSAMXG00000008120	sigmar1/pip4p1a/ap2a1/clcn3/tmem9b
MOLNG-2677	pachonstarved_VS_surfacestarved	Down	Cellular Components	GO:0005770	late endosome	2/56	50/10711	0.028019685427778	0.2490638704691378	0.2294009333268375	2	0.26	2/0.26	ENSAMXG00000014236/ENSAMXG00000013665	pip4p1a/clcn3
MOLNG-2677	pachonstarved_VS_surfacestarved	Down	Cellular Components	GO:0098588	bounding membrane of organelle	6/56	492/10711	0.0425212671779291	0.2870430554220453	0.2643817615729364	6	2.57	6/2.57	ENSAMXG00000009814/ENSAMXG00000014236/ENSAMXG00000025815/ENSAMXG00000010351/ENSAMXG00000013665/ENSAMXG00000008120	sigmar1/pip4p1a/b3galt2/ap2a1/clcn3/tmem9b
MOLNG-2677	pachonstarved_VS_surfacestarved	Down	Biological Process	GO:0046174	polyol catabolic process	2/73	13/11822	0.00280723137103	0.4402879691875309	0.4381075727030136	2	0.08	2/0.08	ENSAMXG00000003957/ENSAMXG00000005230	miox/
MOLNG-2677	pachonstarved_VS_surfacestarved	Down	Biological Process	GO:0050953	sensory perception of light stimulus	3/73	48/11822	0.0032014287398824	0.4402879691875309	0.4381075727030136	3	0.3	3/0.3	ENSAMXG00000024339/ENSAMXG00000004323/ENSAMXG00000020117	aoc2/rgrb/ush1gb
MOLNG-2677	pachonstarved_VS_surfacestarved	Down	Biological Process	GO:0009950	dorsal/ventral axis specification	2/73	15/11822	0.0037489133494747	0.4402879691875309	0.4381075727030136	2	0.09	2/0.09	ENSAMXG00000010351/ENSAMXG00000010744	ap2a1/axin2
MOLNG-2677	pachonstarved_VS_surfacestarved	Down	Biological Process	GO:0046164	alcohol catabolic process	2/73	16/11822	0.0042674138788153	0.4402879691875309	0.4381075727030136	2	0.1	2/0.1	ENSAMXG00000003957/ENSAMXG00000005230	miox/
MOLNG-2677	pachonstarved_VS_surfacestarved	Down	Biological Process	GO:1901616	organic hydroxy compound catabolic process	2/73	17/11822	0.0048171550239335	0.4402879691875309	0.4381075727030136	2	0.1	2/0.1	ENSAMXG00000003957/ENSAMXG00000005230	miox/
MOLNG-2677	pachonstarved_VS_surfacestarved	Down	Biological Process	GO:0044262	cellular carbohydrate metabolic process	3/73	68/11822	0.0084959826994479	0.5648425729847892	0.5620453565114107	3	0.42	3/0.42	ENSAMXG00000003957/ENSAMXG00000020429/ENSAMXG00000005230	miox/si:dkey-96f10.1/
MOLNG-2677	pachonstarved_VS_surfacestarved	Down	Biological Process	GO:0014706	striated muscle tissue development	4/73	133/11822	0.0091600734738709	0.5648425729847892	0.5620453565114107	4	0.82	4/0.82	ENSAMXG00000004840/ENSAMXG00000018757/ENSAMXG00000006632/ENSAMXG00000012765	tomm70a/gfra3/myo18aa/kif5ba
MOLNG-2677	pachonstarved_VS_surfacestarved	Down	Biological Process	GO:0060537	muscle tissue development	4/73	136/11822	0.0098878349756637	0.5648425729847892	0.5620453565114107	4	0.84	4/0.84	ENSAMXG00000004840/ENSAMXG00000018757/ENSAMXG00000006632/ENSAMXG00000012765	tomm70a/gfra3/myo18aa/kif5ba
MOLNG-2677	pachonstarved_VS_surfacestarved	Down	Biological Process	GO:0030258	lipid modification	3/73	80/11822	0.0132158630601261	0.5774670204394007	0.5746072851084213	3	0.49	3/0.49	ENSAMXG00000014236/ENSAMXG00000012745/ENSAMXG00000009771	pip4p1a/hsd17b4/pik3ca
MOLNG-2677	pachonstarved_VS_surfacestarved	Down	Biological Process	GO:0007519	skeletal muscle tissue development	3/73	82/11822	0.0141214522792954	0.5774670204394007	0.5746072851084213	3	0.51	3/0.51	ENSAMXG00000018757/ENSAMXG00000006632/ENSAMXG00000012765	gfra3/myo18aa/kif5ba
MOLNG-2677	pachonstarved_VS_surfacestarved	Down	Biological Process	GO:0009798	axis specification	2/73	33/11822	0.0175502583797268	0.5774670204394007	0.5746072851084213	2	0.2	2/0.2	ENSAMXG00000010351/ENSAMXG00000010744	ap2a1/axin2
MOLNG-2677	pachonstarved_VS_surfacestarved	Down	Biological Process	GO:0060538	skeletal muscle organ development	3/73	92/11822	0.019170168021047	0.5774670204394007	0.5746072851084213	3	0.57	3/0.57	ENSAMXG00000018757/ENSAMXG00000006632/ENSAMXG00000012765	gfra3/myo18aa/kif5ba
MOLNG-2677	pachonstarved_VS_surfacestarved	Down	Biological Process	GO:0019751	polyol metabolic process	2/73	35/11822	0.0196214242686761	0.5774670204394007	0.5746072851084213	2	0.22	2/0.22	ENSAMXG00000003957/ENSAMXG00000005230	miox/
MOLNG-2677	pachonstarved_VS_surfacestarved	Down	Biological Process	GO:0044282	small molecule catabolic process	3/73	95/11822	0.0208553585837791	0.5774670204394007	0.5746072851084213	3	0.59	3/0.59	ENSAMXG00000003957/ENSAMXG00000012745/ENSAMXG00000005230	miox/hsd17b4/
MOLNG-2677	pachonstarved_VS_surfacestarved	Down	Biological Process	GO:0007600	sensory perception	3/73	96/11822	0.0214346631262521	0.5774670204394007	0.5746072851084213	3	0.59	3/0.59	ENSAMXG00000024339/ENSAMXG00000004323/ENSAMXG00000020117	aoc2/rgrb/ush1gb
MOLNG-2677	pachonstarved_VS_surfacestarved	Down	Biological Process	GO:0005975	carbohydrate metabolic process	5/73	258/11822	0.0214779561904907	0.5774670204394007	0.5746072851084213	5	1.59	5/1.59	ENSAMXG00000003957/ENSAMXG00000015721/ENSAMXG00000017869/ENSAMXG00000020429/ENSAMXG00000005230	miox/man1b1b/hexa/si:dkey-96f10.1/
MOLNG-2677	pachonstarved_VS_surfacestarved	Down	Biological Process	GO:0016042	lipid catabolic process	3/73	99/11822	0.023225347515427	0.5774670204394007	0.5746072851084213	3	0.61	3/0.61	ENSAMXG00000017880/ENSAMXG00000015056/ENSAMXG00000012745	plcd3a/plbd1/hsd17b4
MOLNG-2677	pachonstarved_VS_surfacestarved	Down	Biological Process	GO:0006629	lipid metabolic process	7/73	479/11822	0.0280013197767407	0.5774670204394007	0.5746072851084213	7	2.96	7/2.96	ENSAMXG00000017880/ENSAMXG00000015056/ENSAMXG00000014409/ENSAMXG00000014236/ENSAMXG00000016625/ENSAMXG00000012745/ENSAMXG00000009771	plcd3a/plbd1/dgkab/pip4p1a/acot11b/hsd17b4/pik3ca
MOLNG-2677	pachonstarved_VS_surfacestarved	Down	Biological Process	GO:1901575	organic substance catabolic process	7/73	492/11822	0.0317544131485461	0.5774670204394007	0.5746072851084213	7	3.04	7/3.04	ENSAMXG00000017880/ENSAMXG00000021444/ENSAMXG00000015056/ENSAMXG00000003957/ENSAMXG00000012745/ENSAMXG00000019037/ENSAMXG00000005230	plcd3a/lgmn/plbd1/miox/hsd17b4/cul2/
MOLNG-2677	pachonstarved_VS_surfacestarved	Down	Biological Process	GO:0007601	visual perception	2/73	47/11822	0.034000890784391	0.5774670204394007	0.5746072851084213	2	0.29	2/0.29	ENSAMXG00000024339/ENSAMXG00000004323	aoc2/rgrb
MOLNG-2677	pachonstarved_VS_surfacestarved	Down	Biological Process	GO:0016052	carbohydrate catabolic process	2/73	48/11822	0.0353399978298044	0.5774670204394007	0.5746072851084213	2	0.3	2/0.3	ENSAMXG00000003957/ENSAMXG00000005230	miox/
MOLNG-2677	pachonstarved_VS_surfacestarved	Down	Biological Process	GO:0060218	hematopoietic stem cell differentiation	2/73	48/11822	0.0353399978298044	0.5774670204394007	0.5746072851084213	2	0.3	2/0.3	ENSAMXG00000016465/ENSAMXG00000010351	irf7/ap2a1
MOLNG-2677	pachonstarved_VS_surfacestarved	Down	Biological Process	GO:0046486	glycerolipid metabolic process	3/73	120/11822	0.037968010071862	0.5774670204394007	0.5746072851084213	3	0.74	3/0.74	ENSAMXG00000014409/ENSAMXG00000014236/ENSAMXG00000009771	dgkab/pip4p1a/pik3ca
MOLNG-2677	pachonstarved_VS_surfacestarved	Down	Biological Process	GO:0007517	muscle organ development	3/73	127/11822	0.0437290489828261	0.5774670204394007	0.5746072851084213	3	0.78	3/0.78	ENSAMXG00000018757/ENSAMXG00000006632/ENSAMXG00000012765	gfra3/myo18aa/kif5ba
MOLNG-2677	pachonstarved_VS_surfacestarved	Down	Biological Process	GO:0061061	muscle structure development	4/73	223/11822	0.0489195050885066	0.5774670204394007	0.5746072851084213	4	1.38	4/1.38	ENSAMXG00000004840/ENSAMXG00000018757/ENSAMXG00000006632/ENSAMXG00000012765	tomm70a/gfra3/myo18aa/kif5ba
MOLNG-2677	pachonrefed_VS_surfacerefed	UP	Biological Process	GO:1901605	alpha-amino acid metabolic process	5/99	83/11822	0.000644545384797423	0.3996181385744022	0.3989396697482997	5	0.7	5/0.7	ENSAMXG00000020455/ENSAMXG00000006009/ENSAMXG00000012538/ENSAMXG00000020893/ENSAMXG00000014431	psat1/asl/kyat3/gcat/gldc
MOLNG-2677	pachonrefed_VS_surfacerefed	UP	Biological Process	GO:0006520	cellular amino acid metabolic process	6/99	154/11822	0.0018347747347356	0.5240343399641008	0.5231446381984571	6	1.29	6/1.29	ENSAMXG00000020455/ENSAMXG00000015502/ENSAMXG00000006009/ENSAMXG00000012538/ENSAMXG00000020893/ENSAMXG00000014431	psat1/hpdb/asl/kyat3/gcat/gldc
MOLNG-2677	pachonrefed_VS_surfacerefed	UP	Biological Process	GO:0098869	cellular oxidant detoxification	3/99	43/11822	0.0055156454456539	0.5240343399641008	0.5231446381984571	3	0.36	3/0.36	ENSAMXG00000015995/ENSAMXG00000004945/ENSAMXG00000009958	gpx4a/ccs/
MOLNG-2677	pachonrefed_VS_surfacerefed	UP	Biological Process	GO:0097237	cellular response to toxic substance	3/99	44/11822	0.005883681290191	0.5240343399641008	0.5231446381984571	3	0.37	3/0.37	ENSAMXG00000015995/ENSAMXG00000004945/ENSAMXG00000009958	gpx4a/ccs/
MOLNG-2677	pachonrefed_VS_surfacerefed	UP	Biological Process	GO:1990748	cellular detoxification	3/99	44/11822	0.005883681290191	0.5240343399641008	0.5231446381984571	3	0.37	3/0.37	ENSAMXG00000015995/ENSAMXG00000004945/ENSAMXG00000009958	gpx4a/ccs/
MOLNG-2677	pachonrefed_VS_surfacerefed	UP	Biological Process	GO:0009069	serine family amino acid metabolic process	2/99	14/11822	0.0059165167415301	0.5240343399641008	0.5231446381984571	2	0.12	2/0.12	ENSAMXG00000020455/ENSAMXG00000014431	psat1/gldc
MOLNG-2677	pachonrefed_VS_surfacerefed	UP	Biological Process	GO:0016358	dendrite development	2/99	14/11822	0.0059165167415301	0.5240343399641008	0.5231446381984571	2	0.12	2/0.12	ENSAMXG00000011215/ENSAMXG00000009215	grip1/ulk2
MOLNG-2677	pachonrefed_VS_surfacerefed	UP	Biological Process	GO:0098754	detoxification	3/99	47/11822	0.0070746466225913	0.5244153020577387	0.5235249534973689	3	0.39	3/0.39	ENSAMXG00000015995/ENSAMXG00000004945/ENSAMXG00000009958	gpx4a/ccs/
MOLNG-2677	pachonrefed_VS_surfacerefed	UP	Biological Process	GO:0019752	carboxylic acid metabolic process	8/99	341/11822	0.0077567394688497	0.5244153020577387	0.5235249534973689	8	2.86	8/2.86	ENSAMXG00000020455/ENSAMXG00000015502/ENSAMXG00000011124/ENSAMXG00000006009/ENSAMXG00000000394/ENSAMXG00000012538/ENSAMXG00000020893/ENSAMXG00000014431	psat1/hpdb/pgam1b/asl/aclya/kyat3/gcat/gldc
MOLNG-2677	pachonrefed_VS_surfacerefed	UP	Biological Process	GO:0043436	oxoacid metabolic process	8/99	349/11822	0.0088609880775316	0.5244153020577387	0.5235249534973689	8	2.92	8/2.92	ENSAMXG00000020455/ENSAMXG00000015502/ENSAMXG00000011124/ENSAMXG00000006009/ENSAMXG00000000394/ENSAMXG00000012538/ENSAMXG00000020893/ENSAMXG00000014431	psat1/hpdb/pgam1b/asl/aclya/kyat3/gcat/gldc
MOLNG-2677	pachonrefed_VS_surfacerefed	UP	Biological Process	GO:0006082	organic acid metabolic process	8/99	352/11822	0.0093041424558631	0.5244153020577387	0.5235249534973689	8	2.95	8/2.95	ENSAMXG00000020455/ENSAMXG00000015502/ENSAMXG00000011124/ENSAMXG00000006009/ENSAMXG00000000394/ENSAMXG00000012538/ENSAMXG00000020893/ENSAMXG00000014431	psat1/hpdb/pgam1b/asl/aclya/kyat3/gcat/gldc
MOLNG-2677	pachonrefed_VS_surfacerefed	UP	Biological Process	GO:0098656	anion transmembrane transport	4/99	106/11822	0.0119904397076919	0.5820874919217413	0.5810992279286653	4	0.89	4/0.89	ENSAMXG00000007933/ENSAMXG00000015746/ENSAMXG00000012634/ENSAMXG00000014532	gabrr3b//slc4a2a/slc25a13
MOLNG-2677	pachonrefed_VS_surfacerefed	UP	Biological Process	GO:0000723	telomere maintenance	2/99	21/11822	0.0131439111079102	0.5820874919217413	0.5810992279286653	2	0.18	2/0.18	ENSAMXG00000012564/ENSAMXG00000018571	stn1/rtel1
MOLNG-2677	pachonrefed_VS_surfacerefed	UP	Biological Process	GO:0032200	telomere organization	2/99	21/11822	0.0131439111079102	0.5820874919217413	0.5810992279286653	2	0.18	2/0.18	ENSAMXG00000012564/ENSAMXG00000018571	stn1/rtel1
MOLNG-2677	pachonrefed_VS_surfacerefed	UP	Biological Process	GO:1901264	carbohydrate derivative transport	2/99	23/11822	0.0156646165968547	0.6099534054230348	0.6089178308807206	2	0.19	2/0.19	ENSAMXG00000015746/ENSAMXG00000016875	/slc28a1
MOLNG-2677	pachonrefed_VS_surfacerefed	UP	Biological Process	GO:0009636	response to toxic substance	3/99	63/11822	0.015740733043175	0.6099534054230348	0.6089178308807206	3	0.53	3/0.53	ENSAMXG00000015995/ENSAMXG00000004945/ENSAMXG00000009958	gpx4a/ccs/
MOLNG-2677	pachonrefed_VS_surfacerefed	UP	Biological Process	GO:1901607	alpha-amino acid biosynthetic process	2/99	29/11822	0.0243357097198988	0.6294327305728115	0.6283640841711599	2	0.24	2/0.24	ENSAMXG00000020455/ENSAMXG00000006009	psat1/asl
MOLNG-2677	pachonrefed_VS_surfacerefed	UP	Biological Process	GO:0008652	cellular amino acid biosynthetic process	2/99	32/11822	0.0292536402598302	0.6294327305728115	0.6283640841711599	2	0.27	2/0.27	ENSAMXG00000020455/ENSAMXG00000006009	psat1/asl
MOLNG-2677	pachonrefed_VS_surfacerefed	UP	Biological Process	GO:1901606	alpha-amino acid catabolic process	2/99	32/11822	0.0292536402598302	0.6294327305728115	0.6283640841711599	2	0.27	2/0.27	ENSAMXG00000020893/ENSAMXG00000014431	gcat/gldc
MOLNG-2677	pachonrefed_VS_surfacerefed	UP	Biological Process	GO:0030833	regulation of actin filament polymerization	3/99	85/11822	0.0343450698023354	0.6294327305728115	0.6283640841711599	3	0.71	3/0.71	ENSAMXG00000003770/ENSAMXG00000021263/ENSAMXG00000012050	wash1/sptbn4b/fam49ba
MOLNG-2677	pachonrefed_VS_surfacerefed	UP	Biological Process	GO:0032271	regulation of protein polymerization	3/99	85/11822	0.0343450698023354	0.6294327305728115	0.6283640841711599	3	0.71	3/0.71	ENSAMXG00000003770/ENSAMXG00000021263/ENSAMXG00000012050	wash1/sptbn4b/fam49ba
MOLNG-2677	pachonrefed_VS_surfacerefed	UP	Biological Process	GO:0008064	regulation of actin polymerization or depolymerization	3/99	86/11822	0.0353762307343827	0.6294327305728115	0.6283640841711599	3	0.72	3/0.72	ENSAMXG00000003770/ENSAMXG00000021263/ENSAMXG00000012050	wash1/sptbn4b/fam49ba
MOLNG-2677	pachonrefed_VS_surfacerefed	UP	Biological Process	GO:0030832	regulation of actin filament length	3/99	86/11822	0.0353762307343827	0.6294327305728115	0.6283640841711599	3	0.72	3/0.72	ENSAMXG00000003770/ENSAMXG00000021263/ENSAMXG00000012050	wash1/sptbn4b/fam49ba
MOLNG-2677	pachonrefed_VS_surfacerefed	UP	Biological Process	GO:0043254	regulation of protein-containing complex assembly	3/99	87/11822	0.0364233074330799	0.6294327305728115	0.6283640841711599	3	0.73	3/0.73	ENSAMXG00000003770/ENSAMXG00000021263/ENSAMXG00000012050	wash1/sptbn4b/fam49ba
MOLNG-2677	pachonrefed_VS_surfacerefed	UP	Biological Process	GO:0007015	actin filament organization	4/99	155/11822	0.0410727032703249	0.6294327305728115	0.6283640841711599	4	1.3	4/1.3	ENSAMXG00000003770/ENSAMXG00000021263/ENSAMXG00000019095/ENSAMXG00000012050	wash1/sptbn4b/pls1/fam49ba
MOLNG-2677	pachonrefed_VS_surfacerefed	UP	Biological Process	GO:0007368	determination of left/right symmetry	4/99	157/11822	0.042720830169455	0.6294327305728115	0.6283640841711599	4	1.31	4/1.31	ENSAMXG00000000479/ENSAMXG00000010835/ENSAMXG00000021379/ENSAMXG00000024846	ahi1/rbpjb/scn5lab/enc3
MOLNG-2677	pachonrefed_VS_surfacerefed	UP	Biological Process	GO:0033554	cellular response to stress	6/99	306/11822	0.0433538040506801	0.6294327305728115	0.6283640841711599	6	2.56	6/2.56	ENSAMXG00000018571/ENSAMXG00000004945/ENSAMXG00000017271/ENSAMXG00000015192/ENSAMXG00000015308/ENSAMXG00000019365	rtel1/ccs/mbd4/parp3/becn1/polm
MOLNG-2677	pachonrefed_VS_surfacerefed	UP	Biological Process	GO:0009063	cellular amino acid catabolic process	2/99	40/11822	0.0440699093006894	0.6294327305728115	0.6283640841711599	2	0.33	2/0.33	ENSAMXG00000020893/ENSAMXG00000014431	gcat/gldc
MOLNG-2677	pachonrefed_VS_surfacerefed	UP	Biological Process	GO:0030041	actin filament polymerization	3/99	94/11822	0.0441942928209015	0.6294327305728115	0.6283640841711599	3	0.79	3/0.79	ENSAMXG00000003770/ENSAMXG00000021263/ENSAMXG00000012050	wash1/sptbn4b/fam49ba
MOLNG-2677	pachonrefed_VS_surfacerefed	UP	Biological Process	GO:0110053	regulation of actin filament organization	3/99	95/11822	0.0453668228218231	0.6294327305728115	0.6283640841711599	3	0.8	3/0.8	ENSAMXG00000003770/ENSAMXG00000021263/ENSAMXG00000012050	wash1/sptbn4b/fam49ba
MOLNG-2677	pachonrefed_VS_surfacerefed	UP	Biological Process	GO:0006629	lipid metabolic process	8/99	479/11822	0.0473878265557542	0.6294327305728115	0.6283640841711599	8	4.01	8/4.01	ENSAMXG00000006275/ENSAMXG00000019276/ENSAMXG00000016009/ENSAMXG00000015923/ENSAMXG00000002297/ENSAMXG00000000394/ENSAMXG00000003161/ENSAMXG00000017456	plcd3b/gal3st1b/pip5k1ca/pgs1/si:ch211-168k14.2/aclya/acad8/PLAAT4
MOLNG-2677	pachonrefed_VS_surfacerefed	UP	Biological Process	GO:0006644	phospholipid metabolic process	4/99	163/11822	0.047887437884384	0.6294327305728115	0.6283640841711599	4	1.36	4/1.36	ENSAMXG00000016009/ENSAMXG00000015923/ENSAMXG00000002297/ENSAMXG00000017456	pip5k1ca/pgs1/si:ch211-168k14.2/PLAAT4
MOLNG-2677	pachonrefed_VS_surfacerefed	UP	Cellular Components	GO:0043025	neuronal cell body	2/82	15/10711	0.0056986977364829	0.4019613126140391	0.3961915330071391	2	0.11	2/0.11	ENSAMXG00000004485/ENSAMXG00000011638	galn/shtn1
MOLNG-2677	pachonrefed_VS_surfacerefed	UP	Cellular Components	GO:0044297	cell body	2/82	17/10711	0.0073083875020734	0.4019613126140391	0.3961915330071391	2	0.13	2/0.13	ENSAMXG00000004485/ENSAMXG00000011638	galn/shtn1
MOLNG-2677	pachonrefed_VS_surfacerefed	UP	Cellular Components	GO:0005604	basement membrane	2/82	25/10711	0.0154966815355889	0.4479074954842608	0.4414782012907067	2	0.19	2/0.19	ENSAMXG00000005792/ENSAMXG00000005822	lamb1b/frem3
MOLNG-2677	pachonrefed_VS_surfacerefed	UP	Cellular Components	GO:0036477	somatodendritic compartment	2/82	38/10711	0.0340682570650221	0.4479074954842608	0.4414782012907067	2	0.29	2/0.29	ENSAMXG00000004485/ENSAMXG00000011638	galn/shtn1
MOLNG-2677	pachonrefed_VS_surfacerefed	UP	Cellular Components	GO:0034702	ion channel complex	3/82	97/10711	0.0381454494672042	0.4479074954842608	0.4414782012907067	3	0.74	3/0.74	ENSAMXG00000007933/ENSAMXG00000021379/ENSAMXG00000013243	gabrr3b/scn5lab/cacnb2b
MOLNG-2677	pachonrefed_VS_surfacerefed	UP	Cellular Components	GO:1902495	transmembrane transporter complex	3/82	105/10711	0.0464590974311172	0.4479074954842608	0.4414782012907067	3	0.8	3/0.8	ENSAMXG00000007933/ENSAMXG00000021379/ENSAMXG00000013243	gabrr3b/scn5lab/cacnb2b
MOLNG-2677	pachonrefed_VS_surfacerefed	UP	Cellular Components	GO:1990351	transporter complex	3/82	106/10711	0.0475565252460429	0.4479074954842608	0.4414782012907067	3	0.81	3/0.81	ENSAMXG00000007933/ENSAMXG00000021379/ENSAMXG00000013243	gabrr3b/scn5lab/cacnb2b
MOLNG-2677	pachonrefed_VS_surfacerefed	UP	Molecular Functions	GO:0030170	pyridoxal phosphate binding	3/111	38/13591	0.003633100943287	0.1964199873256108	0.175027711478267	3	0.31	3/0.31	ENSAMXG00000017574/ENSAMXG00000012538/ENSAMXG00000020893	accs/kyat3/gcat
MOLNG-2677	pachonrefed_VS_surfacerefed	UP	Molecular Functions	GO:0070279	vitamin B6 binding	3/111	38/13591	0.003633100943287	0.1964199873256108	0.175027711478267	3	0.31	3/0.31	ENSAMXG00000017574/ENSAMXG00000012538/ENSAMXG00000020893	accs/kyat3/gcat
MOLNG-2677	pachonrefed_VS_surfacerefed	UP	Molecular Functions	GO:0019842	vitamin binding	4/111	80/13591	0.0041392221381433	0.1964199873256108	0.175027711478267	4	0.65	4/0.65	ENSAMXG00000017574/ENSAMXG00000012538/ENSAMXG00000020893/ENSAMXG00000017324	accs/kyat3/gcat/mut
MOLNG-2677	pachonrefed_VS_surfacerefed	UP	Molecular Functions	GO:0015301	anion:anion antiporter activity	2/111	13/13591	0.0048618808743963	0.1964199873256108	0.175027711478267	2	0.11	2/0.11	ENSAMXG00000015746/ENSAMXG00000012634	/slc4a2a
MOLNG-2677	pachonrefed_VS_surfacerefed	UP	Molecular Functions	GO:0140323	solute:anion antiporter activity	2/111	13/13591	0.0048618808743963	0.1964199873256108	0.175027711478267	2	0.11	2/0.11	ENSAMXG00000015746/ENSAMXG00000012634	/slc4a2a
MOLNG-2677	pachonrefed_VS_surfacerefed	UP	Molecular Functions	GO:0016209	antioxidant activity	3/111	46/13591	0.0062362404804615	0.2069240587956672	0.184387775164456	3	0.38	3/0.38	ENSAMXG00000015995/ENSAMXG00000004945/ENSAMXG00000009958	gpx4a/ccs/
MOLNG-2677	pachonrefed_VS_surfacerefed	UP	Molecular Functions	GO:0008483	transaminase activity	2/111	18/13591	0.0092865107747392	0.2069240587956672	0.184387775164456	2	0.15	2/0.15	ENSAMXG00000020455/ENSAMXG00000012538	psat1/kyat3
MOLNG-2677	pachonrefed_VS_surfacerefed	UP	Molecular Functions	GO:0015932	nucleobase-containing compound transmembrane transporter activity	3/111	55/13591	0.0102224387767755	0.2069240587956672	0.184387775164456	3	0.45	3/0.45	ENSAMXG00000015746/ENSAMXG00000016875/ENSAMXG00000014532	/slc28a1/slc25a13
MOLNG-2677	pachonrefed_VS_surfacerefed	UP	Molecular Functions	GO:1901505	carbohydrate derivative transmembrane transporter activity	3/111	55/13591	0.0102224387767755	0.2069240587956672	0.184387775164456	3	0.45	3/0.45	ENSAMXG00000015746/ENSAMXG00000016875/ENSAMXG00000014532	/slc28a1/slc25a13
MOLNG-2677	pachonrefed_VS_surfacerefed	UP	Molecular Functions	GO:0016769	transferase activity, transferring nitrogenous groups	2/111	19/13591	0.0103240936994277	0.2069240587956672	0.184387775164456	2	0.16	2/0.16	ENSAMXG00000020455/ENSAMXG00000012538	psat1/kyat3
MOLNG-2677	pachonrefed_VS_surfacerefed	UP	Molecular Functions	GO:0004620	phospholipase activity	3/111	57/13591	0.0112681418156056	0.2069240587956672	0.184387775164456	3	0.47	3/0.47	ENSAMXG00000006275/ENSAMXG00000002297/ENSAMXG00000017456	plcd3b/si:ch211-168k14.2/PLAAT4
MOLNG-2677	pachonrefed_VS_surfacerefed	UP	Molecular Functions	GO:0016866	intramolecular transferase activity	2/111	25/13591	0.0175459237876701	0.2944332261765916	0.2623662411474579	2	0.2	2/0.2	ENSAMXG00000011124/ENSAMXG00000017324	pgam1b/mut
MOLNG-2677	pachonrefed_VS_surfacerefed	UP	Molecular Functions	GO:0005543	phospholipid binding	4/111	126/13591	0.0197139952013205	0.2944332261765916	0.2623662411474579	4	1.03	4/1.03	ENSAMXG00000005024/ENSAMXG00000011125/ENSAMXG00000002297/ENSAMXG00000021263	nisch/snx15/si:ch211-168k14.2/sptbn4b
MOLNG-2677	pachonrefed_VS_surfacerefed	UP	Molecular Functions	GO:0016298	lipase activity	3/111	74/13591	0.022602766958776	0.2944332261765916	0.2623662411474579	3	0.6	3/0.6	ENSAMXG00000006275/ENSAMXG00000002297/ENSAMXG00000017456	plcd3b/si:ch211-168k14.2/PLAAT4
MOLNG-2677	pachonrefed_VS_surfacerefed	UP	Molecular Functions	GO:0004601	peroxidase activity	2/111	29/13591	0.0232493137081787	0.2944332261765916	0.2623662411474579	2	0.24	2/0.24	ENSAMXG00000015995/ENSAMXG00000009958	gpx4a/
MOLNG-2677	pachonrefed_VS_surfacerefed	UP	Molecular Functions	GO:0016829	lyase activity	4/111	133/13591	0.0235044873937055	0.2944332261765916	0.2623662411474579	4	1.09	4/1.09	ENSAMXG00000015502/ENSAMXG00000006009/ENSAMXG00000012538/ENSAMXG00000014431	hpdb/asl/kyat3/gldc
MOLNG-2677	pachonrefed_VS_surfacerefed	UP	Molecular Functions	GO:0016684	oxidoreductase activity, acting on peroxide as acceptor	2/111	30/13591	0.0247790338861488	0.2944332261765916	0.2623662411474579	2	0.25	2/0.25	ENSAMXG00000015995/ENSAMXG00000009958	gpx4a/
MOLNG-2677	pachonrefed_VS_surfacerefed	UP	Molecular Functions	GO:0035091	phosphatidylinositol binding	3/111	83/13591	0.0304034914118962	0.3071019439801732	0.2736551976060949	3	0.68	3/0.68	ENSAMXG00000005024/ENSAMXG00000011125/ENSAMXG00000002297	nisch/snx15/si:ch211-168k14.2
MOLNG-2677	pachonrefed_VS_surfacerefed	UP	Molecular Functions	GO:0048037	cofactor binding	7/111	370/13591	0.0319151730846934	0.3071019439801732	0.2736551976060949	7	3.02	7/3.02	ENSAMXG00000017574/ENSAMXG00000009958/ENSAMXG00000000864/ENSAMXG00000012538/ENSAMXG00000020893/ENSAMXG00000017324/ENSAMXG00000003161	accs///kyat3/gcat/mut/acad8
MOLNG-2677	pachonrefed_VS_surfacerefed	UP	Molecular Functions	GO:0005347	ATP transmembrane transporter activity	2/111	39/13591	0.0402605710556741	0.3071019439801732	0.2736551976060949	2	0.32	2/0.32	ENSAMXG00000015746/ENSAMXG00000014532	/slc25a13
MOLNG-2677	pachonrefed_VS_surfacerefed	UP	Molecular Functions	GO:0017048	Rho GTPase binding	2/111	39/13591	0.0402605710556741	0.3071019439801732	0.2736551976060949	2	0.32	2/0.32	ENSAMXG00000007413/ENSAMXG00000012050	arhgef12b/fam49ba
MOLNG-2677	pachonrefed_VS_surfacerefed	UP	Molecular Functions	GO:0003779	actin binding	6/111	312/13591	0.0426376894264547	0.3071019439801732	0.2736551976060949	6	2.55	6/2.55	ENSAMXG00000003770/ENSAMXG00000021263/ENSAMXG00000011638/ENSAMXG00000024846/ENSAMXG00000019095/ENSAMXG00000017247	wash1/sptbn4b/shtn1/enc3/pls1/myo5ab
MOLNG-2677	pachonrefed_VS_surfacerefed	UP	Molecular Functions	GO:0022853	active ion transmembrane transporter activity	3/111	95/13591	0.0427273388487421	0.3071019439801732	0.2736551976060949	3	0.78	3/0.78	ENSAMXG00000015746/ENSAMXG00000012634/ENSAMXG00000016875	/slc4a2a/slc28a1
MOLNG-2677	pachonrefed_VS_surfacerefed	UP	Molecular Functions	GO:0015318	inorganic molecular entity transmembrane transporter activity	8/111	482/13591	0.0436408170684219	0.3071019439801732	0.2736551976060949	8	3.94	8/3.94	ENSAMXG00000014880/ENSAMXG00000000107/ENSAMXG00000007933/ENSAMXG00000012634/ENSAMXG00000021379/ENSAMXG00000013243/ENSAMXG00000016875/ENSAMXG00000014532	kcnk10b/cngb3.2/gabrr3b/slc4a2a/scn5lab/cacnb2b/slc28a1/slc25a13
MOLNG-2677	pachonrefed_VS_surfacerefed	UP	Molecular Functions	GO:0000295	adenine nucleotide transmembrane transporter activity	2/111	41/13591	0.0440888929476486	0.3071019439801732	0.2736551976060949	2	0.33	2/0.33	ENSAMXG00000015746/ENSAMXG00000014532	/slc25a13
MOLNG-2677	pachonrefed_VS_surfacerefed	UP	Molecular Functions	GO:0005346	purine ribonucleotide transmembrane transporter activity	2/111	41/13591	0.0440888929476486	0.3071019439801732	0.2736551976060949	2	0.33	2/0.33	ENSAMXG00000015746/ENSAMXG00000014532	/slc25a13
MOLNG-2677	pachonrefed_VS_surfacerefed	UP	Molecular Functions	GO:0015215	nucleotide transmembrane transporter activity	2/111	41/13591	0.0440888929476486	0.3071019439801732	0.2736551976060949	2	0.33	2/0.33	ENSAMXG00000015746/ENSAMXG00000014532	/slc25a13
MOLNG-2677	pachonrefed_VS_surfacerefed	UP	Molecular Functions	GO:0015216	purine nucleotide transmembrane transporter activity	2/111	41/13591	0.0440888929476486	0.3071019439801732	0.2736551976060949	2	0.33	2/0.33	ENSAMXG00000015746/ENSAMXG00000014532	/slc25a13
MOLNG-2677	pachonrefed_VS_surfacerefed	UP	Molecular Functions	GO:0015605	organophosphate ester transmembrane transporter activity	2/111	41/13591	0.0440888929476486	0.3071019439801732	0.2736551976060949	2	0.33	2/0.33	ENSAMXG00000015746/ENSAMXG00000014532	/slc25a13
MOLNG-2677	pachonrefed_VS_surfacerefed	UP	Molecular Functions	GO:0015297	antiporter activity	2/111	42/13591	0.04605190257588	0.3077894204622264	0.274267800411885	2	0.34	2/0.34	ENSAMXG00000015746/ENSAMXG00000012634	/slc4a2a
MOLNG-2677	pachonrefed_VS_surfacerefed	UP	Molecular Functions	GO:0008509	anion transmembrane transporter activity	4/111	168/13591	0.0487960595371575	0.3077894204622264	0.274267800411885	4	1.37	4/1.37	ENSAMXG00000007933/ENSAMXG00000015746/ENSAMXG00000012634/ENSAMXG00000014532	gabrr3b//slc4a2a/slc25a13
MOLNG-2677	pachonrefed_VS_surfacerefed	Down	Biological Process	GO:0046058	cAMP metabolic process	3/71	18/11822	0.00015878371112419438	0.0722465885615084	0.0707005366374044	3	0.11	3/0.11	ENSAMXG00000010617/ENSAMXG00000011826/ENSAMXG00000019516	pde4ba/si:ch211-132f19.7/pde8b
MOLNG-2677	pachonrefed_VS_surfacerefed	Down	Biological Process	GO:0009187	cyclic nucleotide metabolic process	3/71	33/11822	0.0009953114822982688	0.2264333622228561	0.2215877668485093	3	0.2	3/0.2	ENSAMXG00000010617/ENSAMXG00000011826/ENSAMXG00000019516	pde4ba/si:ch211-132f19.7/pde8b
MOLNG-2677	pachonrefed_VS_surfacerefed	Down	Biological Process	GO:1901575	organic substance catabolic process	9/71	492/11822	0.0026098529722713	0.3023215727854824	0.2958519960399284	9	2.95	9/2.95	ENSAMXG00000017880/ENSAMXG00000015056/ENSAMXG00000010617/ENSAMXG00000021444/ENSAMXG00000003957/ENSAMXG00000019516/ENSAMXG00000012048/ENSAMXG00000008075/ENSAMXG00000007828	plcd3a/plbd1/pde4ba/lgmn/miox/pde8b//cnot7/hibadha
MOLNG-2677	pachonrefed_VS_surfacerefed	Down	Biological Process	GO:0072523	purine-containing compound catabolic process	2/71	13/11822	0.0026577720684438	0.3023215727854824	0.2958519960399284	2	0.08	2/0.08	ENSAMXG00000010617/ENSAMXG00000019516	pde4ba/pde8b
MOLNG-2677	pachonrefed_VS_surfacerefed	Down	Biological Process	GO:0009166	nucleotide catabolic process	2/71	17/11822	0.0045627279166737	0.4095502723725204	0.4007860386664573	2	0.1	2/0.1	ENSAMXG00000010617/ENSAMXG00000019516	pde4ba/pde8b
MOLNG-2677	pachonrefed_VS_surfacerefed	Down	Biological Process	GO:0044248	cellular catabolic process	8/71	454/11822	0.0056787365310395	0.4095502723725204	0.4007860386664573	8	2.73	8/2.73	ENSAMXG00000013875/ENSAMXG00000010617/ENSAMXG00000021444/ENSAMXG00000003957/ENSAMXG00000019516/ENSAMXG00000012048/ENSAMXG00000008075/ENSAMXG00000007828	si:ch211-153b23.5/pde4ba/lgmn/miox/pde8b//cnot7/hibadha
MOLNG-2677	pachonrefed_VS_surfacerefed	Down	Biological Process	GO:1901292	nucleoside phosphate catabolic process	2/71	20/11822	0.0063007734211157	0.4095502723725204	0.4007860386664573	2	0.12	2/0.12	ENSAMXG00000010617/ENSAMXG00000019516	pde4ba/pde8b
MOLNG-2677	pachonrefed_VS_surfacerefed	Down	Biological Process	GO:0006631	fatty acid metabolic process	3/71	77/11822	0.0110573216697645	0.4200166977842351	0.4110284862064349	3	0.46	3/0.46	ENSAMXG00000016625/ENSAMXG00000012048/ENSAMXG00000006545	acot11b//acot11a
MOLNG-2677	pachonrefed_VS_surfacerefed	Down	Biological Process	GO:0009150	purine ribonucleotide metabolic process	4/71	146/11822	0.0114456526356644	0.4200166977842351	0.4110284862064349	4	0.88	4/0.88	ENSAMXG00000010617/ENSAMXG00000008743/ENSAMXG00000011826/ENSAMXG00000019516	pde4ba/atic/si:ch211-132f19.7/pde8b
MOLNG-2677	pachonrefed_VS_surfacerefed	Down	Biological Process	GO:0032787	monocarboxylic acid metabolic process	4/71	154/11822	0.0137018030987707	0.4200166977842351	0.4110284862064349	4	0.92	4/0.92	ENSAMXG00000016625/ENSAMXG00000012048/ENSAMXG00000007438/ENSAMXG00000006545	acot11b//IDH2/acot11a
MOLNG-2677	pachonrefed_VS_surfacerefed	Down	Biological Process	GO:0006163	purine nucleotide metabolic process	4/71	155/11822	0.0140022994068422	0.4200166977842351	0.4110284862064349	4	0.93	4/0.93	ENSAMXG00000010617/ENSAMXG00000008743/ENSAMXG00000011826/ENSAMXG00000019516	pde4ba/atic/si:ch211-132f19.7/pde8b
MOLNG-2677	pachonrefed_VS_surfacerefed	Down	Biological Process	GO:0009259	ribonucleotide metabolic process	4/71	159/11822	0.0152461811194552	0.4200166977842351	0.4110284862064349	4	0.95	4/0.95	ENSAMXG00000010617/ENSAMXG00000008743/ENSAMXG00000011826/ENSAMXG00000019516	pde4ba/atic/si:ch211-132f19.7/pde8b
MOLNG-2677	pachonrefed_VS_surfacerefed	Down	Biological Process	GO:1901136	carbohydrate derivative catabolic process	2/71	32/11822	0.0157038742900896	0.4200166977842351	0.4110284862064349	2	0.19	2/0.19	ENSAMXG00000010617/ENSAMXG00000019516	pde4ba/pde8b
MOLNG-2677	pachonrefed_VS_surfacerefed	Down	Biological Process	GO:0019693	ribose phosphate metabolic process	4/71	161/11822	0.0158935137513246	0.4200166977842351	0.4110284862064349	4	0.97	4/0.97	ENSAMXG00000010617/ENSAMXG00000008743/ENSAMXG00000011826/ENSAMXG00000019516	pde4ba/atic/si:ch211-132f19.7/pde8b
MOLNG-2677	pachonrefed_VS_surfacerefed	Down	Biological Process	GO:0019752	carboxylic acid metabolic process	6/71	341/11822	0.0163897037007856	0.4200166977842351	0.4110284862064349	6	2.05	6/2.05	ENSAMXG00000016599/ENSAMXG00000016625/ENSAMXG00000012048/ENSAMXG00000007828/ENSAMXG00000007438/ENSAMXG00000006545	ITIH3/acot11b//hibadha/IDH2/acot11a
MOLNG-2677	pachonrefed_VS_surfacerefed	Down	Biological Process	GO:0072521	purine-containing compound metabolic process	4/71	163/11822	0.0165579603236104	0.4200166977842351	0.4110284862064349	4	0.98	4/0.98	ENSAMXG00000010617/ENSAMXG00000008743/ENSAMXG00000011826/ENSAMXG00000019516	pde4ba/atic/si:ch211-132f19.7/pde8b
MOLNG-2677	pachonrefed_VS_surfacerefed	Down	Biological Process	GO:0034655	nucleobase-containing compound catabolic process	3/71	91/11822	0.0173047787073048	0.4200166977842351	0.4110284862064349	3	0.55	3/0.55	ENSAMXG00000010617/ENSAMXG00000019516/ENSAMXG00000008075	pde4ba/pde8b/cnot7
MOLNG-2677	pachonrefed_VS_surfacerefed	Down	Biological Process	GO:0034404	nucleobase-containing small molecule biosynthetic process	2/71	34/11822	0.0176256800969063	0.4200166977842351	0.4110284862064349	2	0.2	2/0.2	ENSAMXG00000010617/ENSAMXG00000019516	pde4ba/pde8b
MOLNG-2677	pachonrefed_VS_surfacerefed	Down	Biological Process	GO:0043436	oxoacid metabolic process	6/71	349/11822	0.0181669058789298	0.4200166977842351	0.4110284862064349	6	2.1	6/2.1	ENSAMXG00000016599/ENSAMXG00000016625/ENSAMXG00000012048/ENSAMXG00000007828/ENSAMXG00000007438/ENSAMXG00000006545	ITIH3/acot11b//hibadha/IDH2/acot11a
MOLNG-2677	pachonrefed_VS_surfacerefed	Down	Biological Process	GO:0006082	organic acid metabolic process	6/71	352/11822	0.0188663543206997	0.4200166977842351	0.4110284862064349	6	2.11	6/2.11	ENSAMXG00000016599/ENSAMXG00000016625/ENSAMXG00000012048/ENSAMXG00000007828/ENSAMXG00000007438/ENSAMXG00000006545	ITIH3/acot11b//hibadha/IDH2/acot11a
MOLNG-2677	pachonrefed_VS_surfacerefed	Down	Biological Process	GO:0044282	small molecule catabolic process	3/71	95/11822	0.01938538605158	0.4200166977842351	0.4110284862064349	3	0.57	3/0.57	ENSAMXG00000003957/ENSAMXG00000012048/ENSAMXG00000007828	miox//hibadha
MOLNG-2677	pachonrefed_VS_surfacerefed	Down	Biological Process	GO:0016042	lipid catabolic process	3/71	99/11822	0.021598751381582	0.4467014490281736	0.4371421930339328	3	0.59	3/0.59	ENSAMXG00000017880/ENSAMXG00000015056/ENSAMXG00000012048	plcd3a/plbd1/
MOLNG-2677	pachonrefed_VS_surfacerefed	Down	Biological Process	GO:0046434	organophosphate catabolic process	2/71	43/11822	0.0274074357472417	0.5421905767389125	0.5305878865484326	2	0.26	2/0.26	ENSAMXG00000010617/ENSAMXG00000019516	pde4ba/pde8b
MOLNG-2677	pachonrefed_VS_surfacerefed	Down	Biological Process	GO:0007601	visual perception	2/71	47/11822	0.0323115836854898	0.5451211496459306	0.533455746212212	2	0.28	2/0.28	ENSAMXG00000024339/ENSAMXG00000004323	aoc2/rgrb
MOLNG-2677	pachonrefed_VS_surfacerefed	Down	Biological Process	GO:0044270	cellular nitrogen compound catabolic process	3/71	117/11822	0.0332035013653047	0.5451211496459306	0.533455746212212	3	0.7	3/0.7	ENSAMXG00000010617/ENSAMXG00000019516/ENSAMXG00000008075	pde4ba/pde8b/cnot7
MOLNG-2677	pachonrefed_VS_surfacerefed	Down	Biological Process	GO:0050953	sensory perception of light stimulus	2/71	48/11822	0.0335877970519246	0.5451211496459306	0.533455746212212	2	0.29	2/0.29	ENSAMXG00000024339/ENSAMXG00000004323	aoc2/rgrb
MOLNG-2677	pachonrefed_VS_surfacerefed	Down	Biological Process	GO:0019439	aromatic compound catabolic process	3/71	121/11822	0.0361455195475985	0.5451211496459306	0.533455746212212	3	0.73	3/0.73	ENSAMXG00000010617/ENSAMXG00000019516/ENSAMXG00000008075	pde4ba/pde8b/cnot7
MOLNG-2677	pachonrefed_VS_surfacerefed	Down	Biological Process	GO:0046700	heterocycle catabolic process	3/71	121/11822	0.0361455195475985	0.5451211496459306	0.533455746212212	3	0.73	3/0.73	ENSAMXG00000010617/ENSAMXG00000019516/ENSAMXG00000008075	pde4ba/pde8b/cnot7
MOLNG-2677	pachonrefed_VS_surfacerefed	Down	Biological Process	GO:0002684	positive regulation of immune system process	2/71	50/11822	0.0361984963534483	0.5451211496459306	0.533455746212212	2	0.3	2/0.3	ENSAMXG00000013586/ENSAMXG00000000480	c3b.2/stat5a
MOLNG-2677	pachonrefed_VS_surfacerefed	Down	Biological Process	GO:1901361	organic cyclic compound catabolic process	3/71	127/11822	0.0408026355176827	0.5451211496459306	0.533455746212212	3	0.76	3/0.76	ENSAMXG00000010617/ENSAMXG00000019516/ENSAMXG00000008075	pde4ba/pde8b/cnot7
MOLNG-2677	pachonrefed_VS_surfacerefed	Down	Biological Process	GO:0009117	nucleotide metabolic process	4/71	220/11822	0.0431162727980907	0.5451211496459306	0.533455746212212	4	1.32	4/1.32	ENSAMXG00000010617/ENSAMXG00000008743/ENSAMXG00000011826/ENSAMXG00000019516	pde4ba/atic/si:ch211-132f19.7/pde8b
MOLNG-2677	pachonrefed_VS_surfacerefed	Down	Biological Process	GO:0006753	nucleoside phosphate metabolic process	4/71	228/11822	0.0480651263203643	0.5451211496459306	0.533455746212212	4	1.37	4/1.37	ENSAMXG00000010617/ENSAMXG00000008743/ENSAMXG00000011826/ENSAMXG00000019516	pde4ba/atic/si:ch211-132f19.7/pde8b
MOLNG-2677	pachonrefed_VS_surfacerefed	Down	Cellular Components	GO:0019867	outer membrane	2/52	50/10711	0.0244118548699884	0.3925882651643098	0.3801907410012263	2	0.24	2/0.24	ENSAMXG00000012048/ENSAMXG00000009814	/sigmar1
MOLNG-2677	pachonrefed_VS_surfacerefed	Down	Cellular Components	GO:0031968	organelle outer membrane	2/52	50/10711	0.0244118548699884	0.3925882651643098	0.3801907410012263	2	0.24	2/0.24	ENSAMXG00000012048/ENSAMXG00000009814	/sigmar1
MOLNG-2677	pachonrefed_VS_surfacerefed	Down	Cellular Components	GO:0016459	myosin complex	2/52	69/10711	0.0441116979683151	0.3925882651643098	0.3801907410012263	2	0.33	2/0.33	ENSAMXG00000012478/ENSAMXG00000006632	myo1ea/myo18aa
MOLNG-2677	pachonrefed_VS_surfacerefed	Down	Cellular Components	GO:0005579	membrane attack complex	1/52	10/10711	0.0475207518370196	0.3925882651643098	0.3801907410012263	1	0.05	1/0.05	ENSAMXG00000017176
MOLNG-2677	pachonrefed_VS_surfacerefed	Down	Molecular Functions	GO:0016790	thiolester hydrolase activity	2/99	18/13591	0.0074485504348031	0.3386811982354582	0.3245438705414192	2	0.13	2/0.13	ENSAMXG00000016625/ENSAMXG00000006545	acot11b/acot11a
MOLNG-2677	pachonrefed_VS_surfacerefed	Down	Molecular Functions	GO:0004114	3',5'-cyclic-nucleotide phosphodiesterase activity	2/99	25/13591	0.0141303142375323	0.3386811982354582	0.3245438705414192	2	0.18	2/0.18	ENSAMXG00000010617/ENSAMXG00000019516	pde4ba/pde8b
MOLNG-2677	pachonrefed_VS_surfacerefed	Down	Molecular Functions	GO:0004112	cyclic-nucleotide phosphodiesterase activity	2/99	26/13591	0.0152359165361387	0.3386811982354582	0.3245438705414192	2	0.19	2/0.19	ENSAMXG00000010617/ENSAMXG00000019516	pde4ba/pde8b
MOLNG-2677	pachonrefed_VS_surfacerefed	Down	Molecular Functions	GO:0016712	oxidoreductase activity, acting on paired donors, with incorporation or reduction of molecular oxygen, reduced flavin or flavoprotein as one donor, and incorporation of one atom of oxygen	2/99	27/13591	0.0163775207991639	0.3386811982354582	0.3245438705414192	2	0.2	2/0.2	ENSAMXG00000006936/ENSAMXG00000005285	/cyp2n13
MOLNG-2677	pachonrefed_VS_surfacerefed	Down	Molecular Functions	GO:0004866	endopeptidase inhibitor activity	3/99	74/13591	0.0167363531700479	0.3386811982354582	0.3245438705414192	3	0.54	3/0.54	ENSAMXG00000016599/ENSAMXG00000010535/ENSAMXG00000013586	ITIH3/ctsf/c3b.2
MOLNG-2677	pachonrefed_VS_surfacerefed	Down	Molecular Functions	GO:0061135	endopeptidase regulator activity	3/99	74/13591	0.0167363531700479	0.3386811982354582	0.3245438705414192	3	0.54	3/0.54	ENSAMXG00000016599/ENSAMXG00000010535/ENSAMXG00000013586	ITIH3/ctsf/c3b.2
MOLNG-2677	pachonrefed_VS_surfacerefed	Down	Molecular Functions	GO:0008081	phosphoric diester hydrolase activity	3/99	78/13591	0.019237764388189	0.3386811982354582	0.3245438705414192	3	0.57	3/0.57	ENSAMXG00000017880/ENSAMXG00000010617/ENSAMXG00000019516	plcd3a/pde4ba/pde8b
MOLNG-2677	pachonrefed_VS_surfacerefed	Down	Molecular Functions	GO:0005506	iron ion binding	4/99	143/13591	0.0204963947768365	0.3386811982354582	0.3245438705414192	4	1.04	4/1.04	ENSAMXG00000010828/ENSAMXG00000003957/ENSAMXG00000006936/ENSAMXG00000005285	/miox//cyp2n13
MOLNG-2677	pachonrefed_VS_surfacerefed	Down	Molecular Functions	GO:0030414	peptidase inhibitor activity	3/99	81/13591	0.0212423401858404	0.3386811982354582	0.3245438705414192	3	0.59	3/0.59	ENSAMXG00000016599/ENSAMXG00000010535/ENSAMXG00000013586	ITIH3/ctsf/c3b.2
MOLNG-2677	pachonrefed_VS_surfacerefed	Down	Molecular Functions	GO:0061134	peptidase regulator activity	3/99	84/13591	0.0233573240162385	0.3386811982354582	0.3245438705414192	3	0.61	3/0.61	ENSAMXG00000016599/ENSAMXG00000010535/ENSAMXG00000013586	ITIH3/ctsf/c3b.2
MOLNG-2677	pachonrefed_VS_surfacerefed	Down	Molecular Functions	GO:0016409	palmitoyltransferase activity	2/99	36/13591	0.028179704532118	0.3714597415597384	0.3559541625109653	2	0.26	2/0.26	ENSAMXG00000012048/ENSAMXG00000018223	/ZDHHC14
MOLNG-2677	pachonrefed_VS_surfacerefed	Down	Molecular Functions	GO:0004222	metalloendopeptidase activity	3/99	100/13591	0.036495674220492	0.3822472576682551	0.3662913830287455	3	0.73	3/0.73	ENSAMXG00000003503/ENSAMXG00000014651/ENSAMXG00000015190	/ADAMTS20/ADAMTS5
MOLNG-2677	pachonrefed_VS_surfacerefed	Down	Molecular Functions	GO:0051287	NAD binding	2/99	42/13591	0.0374474065697568	0.3822472576682551	0.3662913830287455	2	0.31	2/0.31	ENSAMXG00000007828/ENSAMXG00000007438	hibadha/IDH2
